# Supplementary material for: Highly enantio- and diastereoselective construction of spirocyclic oxindoles via a palladium-catalyzed decarboxylative asymmetric [4 + 2] annulation strategy
Source: Royal Society of Chemistry journal article supplement (doi:10.1039/d4ob00518j), 2024-01-01
Supplement: d4ob00518j1.pdf [file d4ob00518j1.pdf]

# Highly Enantio- and Diastereoselective Construction of Spirocyclic Oxindoles via a Palladium-Catalyzed Decarboxylative Asymmetric [4 + 2] Annulation Strategy

Pengyuan You,<sup>abc†</sup> Minjie Liu,<sup>bc†</sup> Ke Zhang,<sup>bc</sup> Fan Yang,<sup>abc</sup> Zequn Tan,<sup>abc</sup>  
Fener Chen <sup>\*abc</sup>

<sup>a</sup> *School of Pharmaceutical Sciences, Institute of Drug Discovery and Development, Zhengzhou University, Zhengzhou 450001, China*

<sup>b</sup> *Engineering Center of Catalysis and Synthesis for Chiral Molecules, Fudan University, 200433 Shanghai, China. E-mail: rfchen@fudan.edu.cn*

<sup>c</sup> *Shanghai Engineering Center of Industrial Catalysis for Chiral Drugs, 200433 Shanghai, China*

† These authors contributed equally to this work.

## Table of contents

|                                                                        |    |
|------------------------------------------------------------------------|----|
| <b>1. Supporting tables and figures</b> .....                          | 3  |
| <b>Table S1.</b> Screen of reaction conditions .....                   | 3  |
| <b>Figure S1.</b> NMR spectra of 2a .....                              | 4  |
| <b>Figure S2.</b> HRMS analysis of [Pd-L9] <sup>+</sup> .....          | 5  |
| <b>2. General information</b> .....                                    | 6  |
| <b>3. General Procedures for the Synthesis of the substrates</b> ..... | 7  |
| 3.1 Preparation of <b>2a-2u</b> .....                                  | 7  |
| 3.2 Preparation of <b>1a</b> .....                                     | 19 |
| 3.3 Preparation of <b>1b</b> .....                                     | 20 |
| <b>4. General procedure for the synthesis of products 3</b> .....      | 21 |
| <b>5. Scaled-up Synthesis of the Product 3a</b> .....                  | 39 |
| <b>6. Transformations of the Product 3a</b> .....                      | 40 |
| <b>7. Isomerization of methyleneindodone</b> .....                     | 45 |
| <b>8. Crystal data for enantiopure products 3a</b> .....               | 46 |
| <b>Figure S3.</b> Single crystal structure 3a .....                    | 46 |
| <b>9. Reference</b> .....                                              | 49 |
| <b>10. NMR spectra of representative compounds</b> .....               | 50 |
| <b>11. HPLC chromatograms of representative compounds</b> .....        | 95 |

# 1. Supporting tables and figures

**Table S1.** Screen of reaction conditions

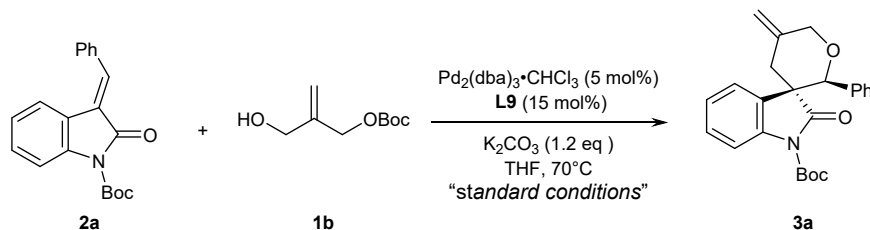

| entry                     | Variation from the "standard conditions" <sup>a</sup> | yield <sup>b</sup> | dr <sup>c</sup> | ee (%) <sup>d</sup> |
|---------------------------|-------------------------------------------------------|--------------------|-----------------|---------------------|
| <b>screen of [Pd]</b>     |                                                       |                    |                 |                     |
| 1                         | $\text{Pd}(\text{OAc})_2$                             | 53                 | >20:1           | 70                  |
| <b>screen of additive</b> |                                                       |                    |                 |                     |
| 2                         | -                                                     | 80                 | >20:1           | 75                  |
| 3                         | $\text{Et}_3\text{N}$                                 | 82                 | >20:1           | 78                  |
| 4                         | Pyridine                                              | 81                 | >20:1           | 76                  |
| 5                         | DMAP                                                  | 40                 | >20:1           | 78                  |
| 6                         | TsOH                                                  | trace              | -               | -                   |
| 7                         | AcOH                                                  | trace              | -               | -                   |

<sup>a</sup> Reactions were performed with **1b** (0.15 mmol), **2a** (0.1 mmol),  $\text{Pd}_2(\text{dba})_3 \cdot \text{CHCl}_3$  (5 mol%), and **L9** (15 mol %) in THF (1.0 mL) at 70 °C for 48 h under an argon atmosphere.

<sup>b</sup> Isolated yield.

<sup>c</sup> *dr* values were determined by crude  $^1\text{H}$  NMR analysis.

<sup>d</sup> *ee* values were determined by chiral HPLC analysis.

Figure S1. NMR spectra of 2a

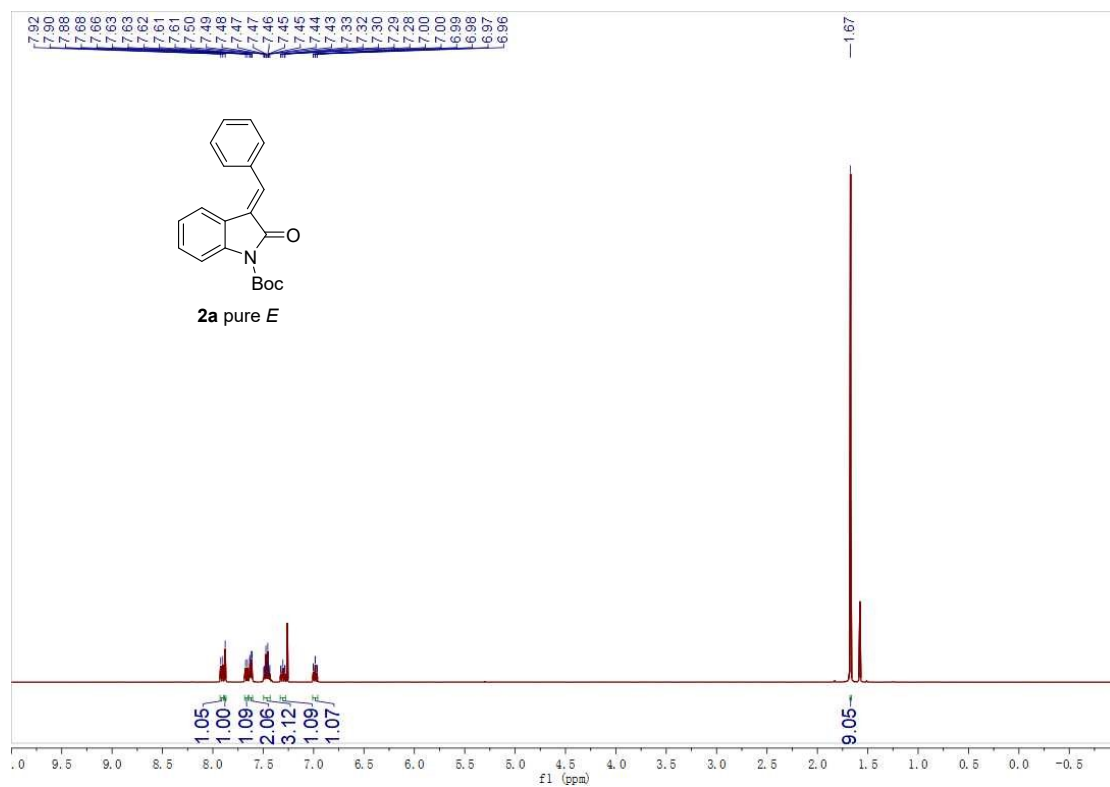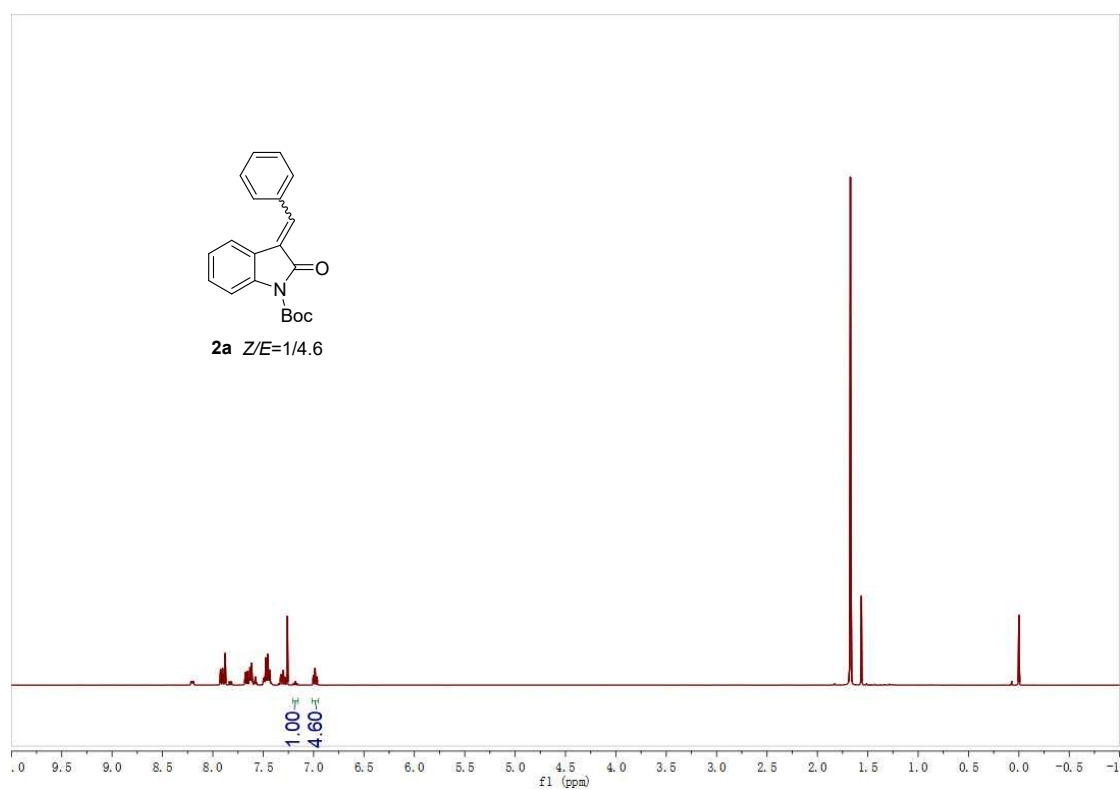

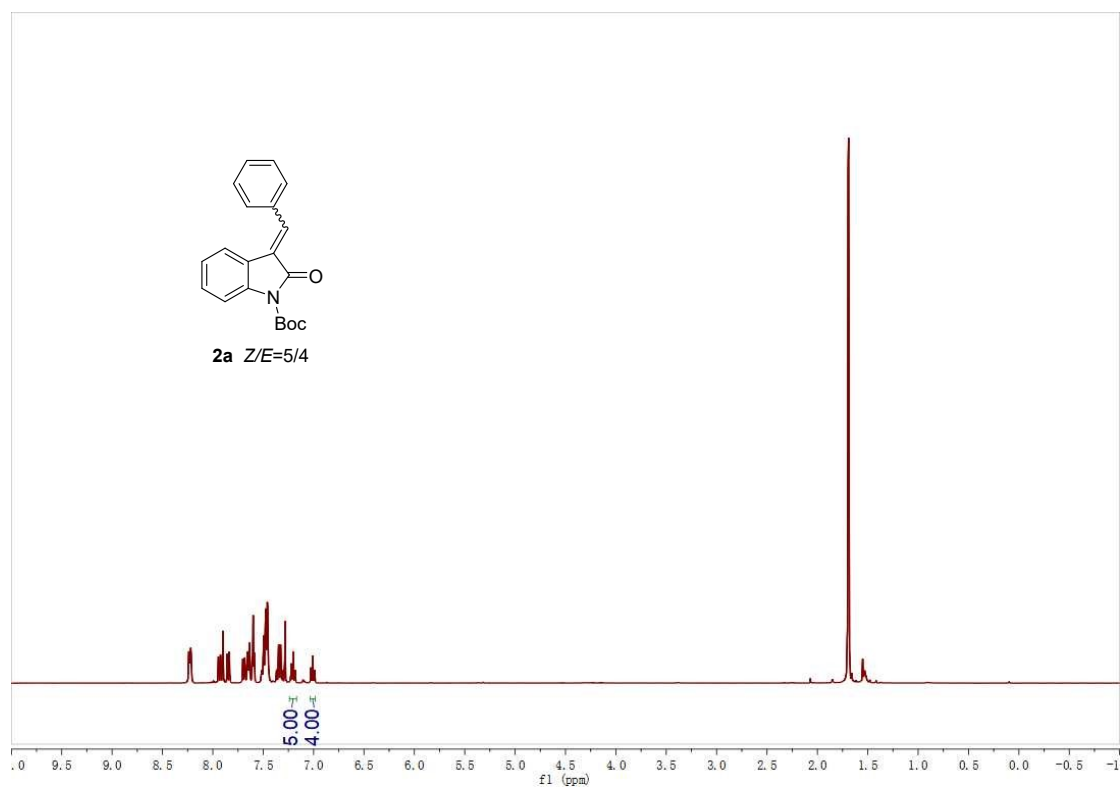

**Figure S2.** HRMS analysis of  $[\text{Pd-L9}]^+$

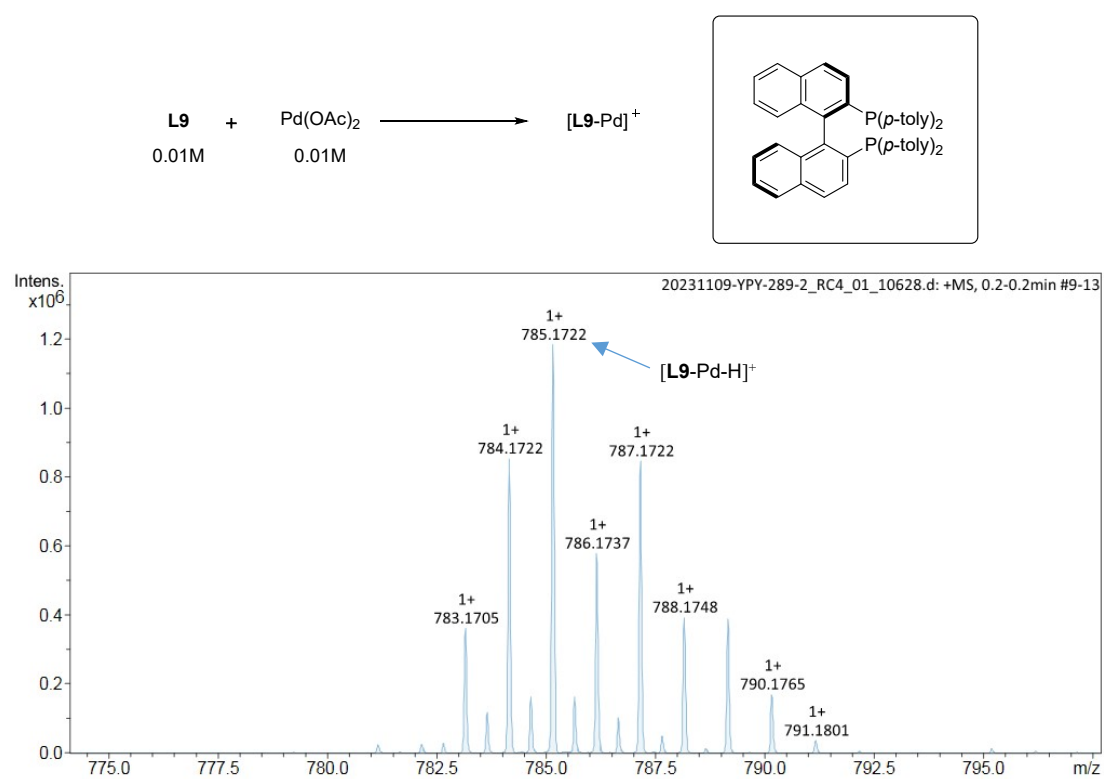

## 2. General information

Unless otherwise noted, all reactions were carried out in oven-dried glassware under N<sub>2</sub> atmosphere using standard Schlenk techniques. Column chromatography was performed over silica gel (200-300 mesh). Reactions were monitored by TLC, GC-MS, and NMR. Reactions employing elevated temperatures were performed using heating mantles.

Commercial reagents were obtained from Adamas, Bide, Jiuding, Leyan, and TCI and used as received. When necessary, solvents were distilled and stored over 4Å molecular sieves.

<sup>1</sup>H NMR spectra were recorded with a Bruker AM400 spectrometer, and chemical shifts (in ppm) were referenced from the residual protium in CDCl<sub>3</sub> (δ = 7.26 ppm). Data are reported as follows: chemical shift [multiplicity (s = singlet, d = doublet, t = triplet, q = quartet, qd = quartet of doublet, m = multiplet), coupling constant (s) in Hertz, integration]. <sup>13</sup>C {<sup>1</sup>H} NMR spectra were obtained using the same NMR spectrometer and were calibrated with CDCl<sub>3</sub> (δ = 77.0 ppm). HRMS were recorded on a Bruker microTOF spectrometer using an electrospray ionization source (ESI). IR data were obtained with a Thermo Fisher Scientific FT-IR. Melting point (MP) was obtained with Hanon MP-430. All HPLC analyses were performed on an Agilent Technologies 1220 system with chiralcel IC HPLC column.

### 3. General Procedures for the Synthesis of the substrates

#### 3.1 Preparation of 2a-2u

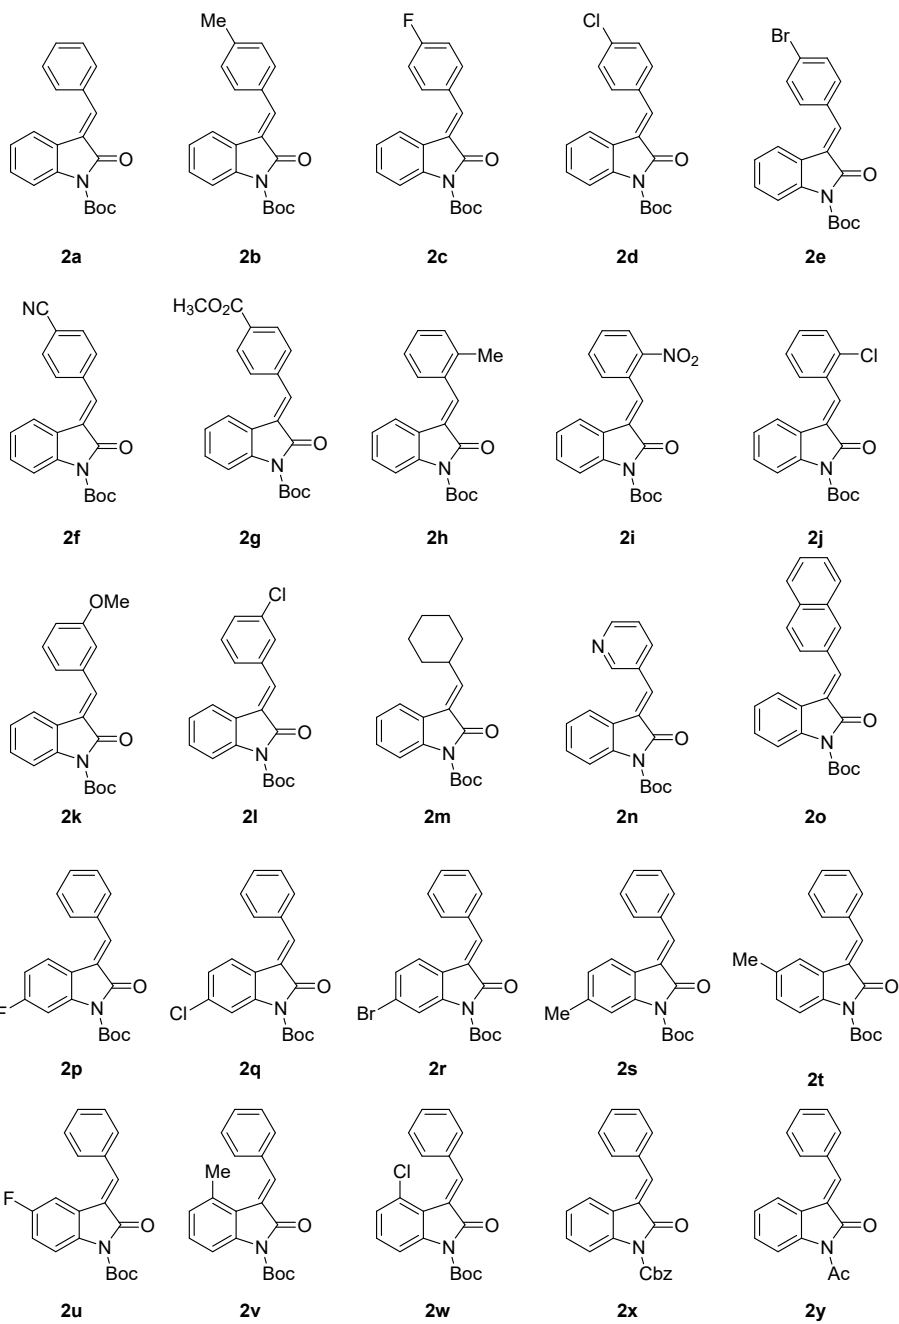

## Preparation of the *N*-Boc protected Alkylidene Oxindoles<sup>[1]</sup>

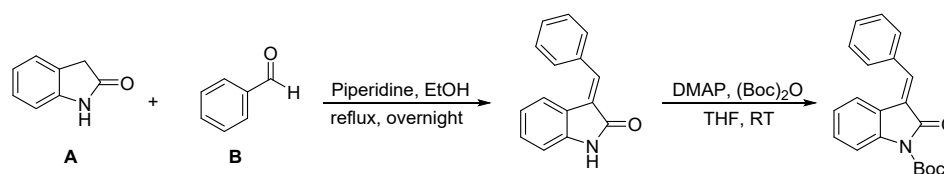

To oxindole **A** (20 mmol, 1 eq) and aldehyde **B** (24 mmol, 1.2 eq) in EtOH (30 mL) was added piperidine (2 mmol, 0.1 eq). After refluxing for 8 hours, the reaction was cooled to room temperature. Crude product was collected by flash filtration. The solid (5mmol) was dissolved by THF (50 mL), then DMAP (0.5 mmol) and (Boc)<sub>2</sub>O (7.5 mmol) were added. After stirring for 1 hour, the reaction was quenched by addition of 50 mL of cold water. The organic layer was then washed with cold water and brine. The organic layer was dried over Na<sub>2</sub>SO<sub>4</sub>, filtered, concentrated. Crude product was purified by EtOH recrystallization to give the corresponding products.

### 2a-2u

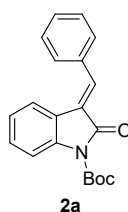

### *tert*-butyl (*E*)-3-benzylidene-2-oxindoline-1-carboxylate (**2a**)

Yellow solid, yield 63% (1.01 g, 3.1 mmol), purified by EtOH recrystallization. The spectroscopic data corresponds to those previously reported in the literature.<sup>[1]</sup>

<sup>1</sup>H NMR (400 MHz, CDCl<sub>3</sub>) δ 7.91 (d, *J* = 8.2 Hz, 1H), 7.88 (s, 1H), 7.67 (d, *J* = 7.6 Hz, 1H), 7.62 (dd, *J* = 7.1, 1.2 Hz, 2H), 7.50 – 7.42 (m, 3H), 7.34 – 7.28 (m, 1H), 6.99 (td, *J* = 7.7, 1.0 Hz, 1H), 1.67 (s, 9H).

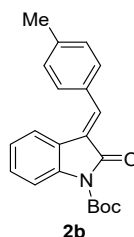

### *tert*-butyl (*E*)-3-(4-methylbenzylidene)-2-oxindoline-1-carboxylate (**2b**)



Yellow solid, yield 33% (0.56 g, 1.7 mmol), purified by EtOH recrystallization.

**Mp** 97.1 - 98.0 °C.

**<sup>1</sup>H NMR** (400 MHz, CDCl<sub>3</sub>) δ 7.91 (d, *J* = 8.1 Hz, 1H), 7.85 (s, 1H), 7.75 (d, *J* = 7.6 Hz, 1H), 7.54 (d, *J* = 8.0 Hz, 2H), 7.33 – 7.26 (m, 3H), 7.00 (td, *J* = 7.7, 1.0 Hz, 1H), 2.43 (s, 3H), 1.67 (s, 9H).

**<sup>13</sup>C NMR** (100 MHz, CDCl<sub>3</sub>) δ 166.8, 149.3, 140.3, 139.8, 138.7, 131.6, 129.8, 129.4, 129.3, 125.3, 123.6, 122.2, 121.7, 115.1, 84.2, 28.1, 21.6.

**HRMS-ESI** (positive): *M* = C<sub>21</sub>H<sub>21</sub>NNaO<sub>3</sub>, calculated (*M*+Na) *m/z*: 358.1414, found: 358.1420.

**IR** (cm<sup>-1</sup>): 3045, 2965, 1775, 1463, 1155, 746.

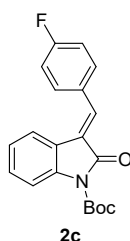

***tert*-butyl (*E*)-3-(4-fluorobenzylidene)-2-oxoindoline-1-carboxylate (**2c**)**

Yellow solid, yield 62% (1.06 g, 3.1 mmol), purified by EtOH recrystallization.

The spectroscopic data corresponds to those previously reported in the literature.<sup>[1]</sup>

**<sup>1</sup>H NMR** (400 MHz, CDCl<sub>3</sub>) δ 7.91 (d, *J* = 8.1 Hz, 1H), 7.81 (s, 1H), 7.66 – 7.59 (m, 3H), 7.35 – 7.28 (m, 1H), 7.21 – 7.12 (m, 2H), 7.00 (td, *J* = 7.7, 0.9 Hz, 1H), 1.67 (s, 9H).

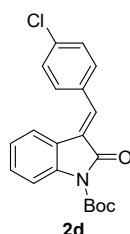

***tert*-butyl (*E*)-3-(4-chlorobenzylidene)-2-oxoindoline-1-carboxylate (**2d**)**

Yellow solid, yield 25% (0.45 g, 1.3 mmol), purified by EtOH recrystallization.

The spectroscopic data corresponds to those previously reported in the literature.<sup>[2]</sup>

**<sup>1</sup>H NMR** (400 MHz, CDCl<sub>3</sub>) δ 7.91 (d, *J* = 8.2 Hz, 1H), 7.78 (s, 1H), 7.61 (d, *J* = 7.5 Hz, 1H), 7.56 (d, *J* = 8.4 Hz, 2H), 7.46 – 7.42 (m, 2H), 7.35 – 7.29 (m, 1H), 7.00 (td, *J* = 7.7, 0.9 Hz, 1H), 1.67 (s, 9H).

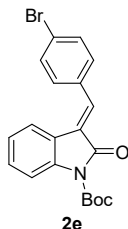

***tert*-butyl (*E*)-3-(4-bromobenzylidene)-2-oxoindoline-1-carboxylate (**2e**)**

Yellow solid, yield 38% (0.75 g, 1.9 mmol), purified by EtOH recrystallization. The spectroscopic data corresponds to those previously reported in the literature.<sup>[1]</sup>

**<sup>1</sup>H NMR** (400 MHz, CDCl<sub>3</sub>) δ 7.91 (d, *J* = 8.2 Hz, 1H), 7.76 (s, 1H), 7.61 (d, *J* = 8.4 Hz, 3H), 7.49 (d, *J* = 8.3 Hz, 2H), 7.35 – 7.28 (m, 1H), 7.00 (td, *J* = 7.7, 0.9 Hz, 1H), 1.67 (s, 9H).

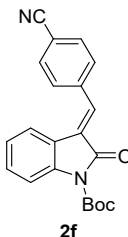

***tert*-butyl (*E*)-3-(4-cyanobenzylidene)-2-oxoindoline-1-carboxylate (**2f**)**

Yellow solid, yield 47% (0.82 g, 2.4 mmol), purified by EtOH recrystallization. The spectroscopic data corresponds to those previously reported in the literature.

**<sup>1</sup>H NMR** (400 MHz, CDCl<sub>3</sub>) δ 7.93 (d, *J* = 8.2 Hz, 1H), 7.80 – 7.74 (m, 3H), 7.71 (d, *J* = 8.0 Hz, 2H), 7.46 (d, *J* = 7.5 Hz, 1H), 7.37 – 7.32 (m, 1H), 7.00 (td, *J* = 7.7, 0.9 Hz, 1H), 1.67 (s, 9H).

**<sup>13</sup>C NMR** (100 MHz, CDCl<sub>3</sub>) δ 165.9, 149.0, 140.5, 139.3, 134.7, 132.5, 131.0, 129.5, 128.3, 123.9, 122.4, 120.5, 118.3, 115.4, 112.9, 84.5, 28.0.

**HRMS-ESI** (positive): *M* = C<sub>21</sub>H<sub>18</sub>N<sub>2</sub>O<sub>3</sub>, calculated (*M*+Na) *m/z*: 369.1210, found: 369.1206.

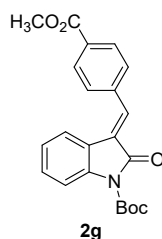

***tert*-butyl(*E*)-3-(4-(methoxycarbonyl)benzylidene)-2-oxoindoline-1-carboxylate (**2g**)**

Yellow solid, yield 53% (1.00 g, 2.6 mmol), purified by EtOH recrystallization.

**Mp** 125.5 - 126.0 °C.

**<sup>1</sup>H NMR** (400 MHz, CDCl<sub>3</sub>) δ 8.13 (d, *J* = 8.3 Hz, 2H), 7.91 (d, *J* = 8.2 Hz, 1H), 7.85 (s, 1H), 7.67 (d, *J* = 8.1 Hz, 2H), 7.54 (d, *J* = 7.6 Hz, 1H), 7.35 – 7.29 (m, 1H), 6.98 (td, *J* = 7.7, 0.9 Hz, 1H), 3.96 (s, 3H), 1.67 (d, *J* = 3.1 Hz, 9H).

**<sup>13</sup>C NMR** (100 MHz, CDCl<sub>3</sub>) δ 166.3, 166.2, 149.1, 140.3, 139.2, 136.3, 131.6, 130.9, 130.5, 129.9, 129.1, 128.9, 127.5, 123.8, 122.5, 121.0, 115.3, 84.4, 52.3, 28.1.

**HRMS-ESI** (positive): *M* = C<sub>22</sub>H<sub>22</sub>NO<sub>5</sub>, calculated (*M*+*H*) *m/z*: 380.1492, found: 380.1489.

**IR** (cm<sup>-1</sup>): 3026, 2984, 1717, 1461, 1152, 780.

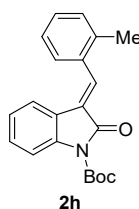

***tert*-butyl (*E*)-3-(2-methylbenzylidene)-2-oxoindoline-1-carboxylate (**2h**)**

Yellow solid, yield 63% (1.06 g, 3.2 mmol), purified by EtOH recrystallization.

**Mp** 101.1 - 101.6 °C.

**<sup>1</sup>H NMR** (400 MHz, CDCl<sub>3</sub>) δ 8.01 – 7.89 (m, 2H), 7.55 (d, *J* = 7.5 Hz, 1H), 7.40 – 7.35 (m, 1H), 7.35 – 7.30 (m, 3H), 7.29 (dd, *J* = 4.4, 3.1 Hz, 1H), 6.96 (td, *J* = 7.7, 0.9 Hz, 1H), 2.36 (s, 3H), 1.70 (s, 9H).

**<sup>13</sup>C NMR** (100 MHz, CDCl<sub>3</sub>) δ 166.4, 149.4, 139.9, 137.6, 137.3, 133.9, 130.6, 129.9, 129.6, 128.1, 126.7, 125.8, 123.8, 122.5, 121.6, 115.1, 84.2, 28.1, 19.9.

**HRMS-ESI** (positive): *M* = C<sub>21</sub>H<sub>21</sub>NNaO<sub>3</sub>, calculated (*M*+*Na*) *m/z*: 358.1414,

found: 358.1409.

IR (cm<sup>-1</sup>): 3012, 2985, 1724, 1460, 1152, 747.

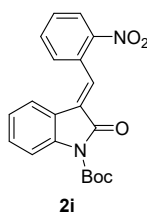

**tert-butyl (E)-3-(2-nitrobenzylidene)-2-oxoindoline-1-carboxylate (2i)**

Yellow solid, yield 49% (0.83 g, 2.3 mmol), purified by EtOH recrystallization. The spectroscopic data corresponds to those previously reported in the literature.<sup>[2]</sup>

<sup>1</sup>H NMR (400 MHz, CDCl<sub>3</sub>) δ 8.33 (dd, *J* = 7.1, 2.5 Hz, 1H), 8.09 (s, 1H), 7.92 (d, *J* = 8.3 Hz, 1H), 7.74 (dd, *J* = 10.8, 4.1 Hz, 1H), 7.70 – 7.62 (m, 2H), 7.29 (ddd, *J* = 8.6, 5.3, 3.6 Hz, 1H), 6.92 – 6.84 (m, 2H), 1.67 (s, 9H).

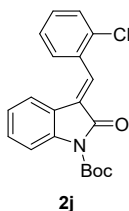

**tert-butyl (E)-3-(2-chlorobenzylidene)-2-oxoindoline-1-carboxylate (2j)**

Yellow solid, yield 54% (0.96 g, 2.7 mmol), purified by EtOH recrystallization. The spectroscopic data corresponds to those previously reported in the literature.<sup>[2]</sup>

<sup>1</sup>H NMR (400 MHz, CDCl<sub>3</sub>) δ 7.94 – 7.88 (m, 2H), 7.66 (dd, *J* = 7.5, 1.6 Hz, 1H), 7.52 (dd, *J* = 7.9, 1.2 Hz, 1H), 7.40 (td, *J* = 7.7, 1.8 Hz, 1H), 7.37 – 7.28 (m, 3H), 6.95 (td, *J* = 7.7, 0.9 Hz, 1H), 1.67 (s, 9H).

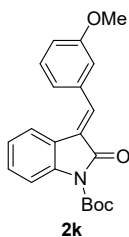

**tert-butyl (E)-3-(3-methoxybenzylidene)-2-oxoindoline-1-carboxylate (2k)**

Yellow solid, yield 26% (0.46 g, 1.3 mmol), purified by EtOH recrystallization.

**Mp** 85.8 - 86.7 °C.

**<sup>1</sup>H NMR** (400 MHz, CDCl<sub>3</sub>) δ 7.90 (d, *J* = 8.2 Hz, 1H), 7.84 (s, 1H), 7.70 (d, *J* = 7.8 Hz, 1H), 7.38 (t, *J* = 7.9 Hz, 1H), 7.30 (t, *J* = 7.9 Hz, 1H), 7.20 (d, *J* = 7.5 Hz, 1H), 7.12 (s, 1H), 6.99 (t, *J* = 8.2 Hz, 2H), 3.83 (s, 3H), 1.67 (s, 9H).

**<sup>13</sup>C NMR** (100 MHz, CDCl<sub>3</sub>) δ 166.6, 159.7, 149.3, 140.0, 138.1, 135.9, 130.0, 129.8, 126.3, 123.7, 122.6, 121.5, 121.4, 115.7, 115.1, 114.1, 84.2, 55.3, 28.1.

**HRMS-ESI** (positive): *M* = C<sub>21</sub>H<sub>21</sub>NNaO<sub>4</sub>, calculated (*M*+Na) *m/z*: 374.1363, found: 374.1358.

**IR** (cm<sup>-1</sup>): 3055, 2977, 1722, 1457, 1151, 788.

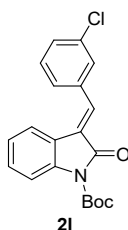

**tert-butyl (*E*)-3-(3-chlorobenzylidene)-2-oxindoline-1-carboxylate (2l)**

Yellow solid, yield 30% (0.53 g, 1.5 mmol), purified by EtOH recrystallization.

**Mp** 108.4 - 109.0 °C.

**<sup>1</sup>H NMR** (400 MHz, CDCl<sub>3</sub>) δ 7.92 (d, *J* = 8.1 Hz, 1H), 7.77 (s, 1H), 7.57 (d, *J* = 8.0 Hz, 2H), 7.48 (d, *J* = 3.0 Hz, 1H), 7.41 (dd, *J* = 3.8, 1.5 Hz, 2H), 7.33 (t, *J* = 7.3 Hz, 1H), 7.05 – 6.97 (m, 1H), 1.67 (s, 9H).

**<sup>13</sup>C NMR** (100 MHz, CDCl<sub>3</sub>) δ 166.3, 149.2, 140.3, 136.4, 136.0, 134.8, 130.5, 130.1, 129.7, 128.8, 127.2, 127.1, 123.8, 122.4, 121.0, 115.3, 84.4, 28.1.

**HRMS-ESI** (positive): *M* = C<sub>20</sub>H<sub>18</sub>ClNNO<sub>3</sub>, calculated (*M*+Na) *m/z*: 378.0867, found: 378.0875.

**IR** (cm<sup>-1</sup>): 3060, 2965, 1775, 1463, 1155, 746.

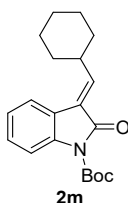

**tert-butyl (*E*)-3-(cyclohexylmethylene)-2-oxindoline-1-carboxylate (2m)**

White solid, yield 15% (0.24 g, 0.7 mmol), purified by EtOH recrystallization.

**Mp** 105.6 - 106.4 °C.

**<sup>1</sup>H NMR** (400 MHz, CDCl<sub>3</sub>) δ 7.91 (d, *J* = 8.2 Hz, 1H), 7.56 (d, *J* = 7.6 Hz, 1H), 7.31 (t, *J* = 7.8 Hz, 1H), 7.17 (t, *J* = 7.6 Hz, 1H), 6.95 (d, *J* = 9.9 Hz, 1H), 3.02 – 2.85 (m, 1H), 1.83 (dd, *J* = 15.8, 6.8 Hz, 4H), 1.74 (d, *J* = 12.5 Hz, 1H), 1.64 (s, 9H), 1.45 – 1.25 (m, 5H).

**<sup>13</sup>C NMR** (100 MHz, CDCl<sub>3</sub>) δ 166.4, 149.4, 148.4, 139.4, 128.9, 124.8, 124.0, 123.0, 122.3, 115.1, 84.0, 38.0, 31.4, 28.1, 25.7, 25.4.

**HRMS-ESI** (positive): *M* = C<sub>22</sub>H<sub>22</sub>NO<sub>5</sub>, calculated (*M*+*H*) *m/z*: 328.1907, found: 328.1903.

**IR** (cm<sup>-1</sup>): 3084, 2926, 1753, 1464, 1158, 739.

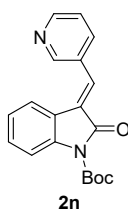

***tert*-butyl (*E*)-2-oxo-3-(pyridin-3-ylmethylene)indoline-1-carboxylate (**2n**)**

Yellow solid, yield 31% (0.50 g, 1.6 mmol), purified by EtOH recrystallization.

**Mp** 131.6 - 132.3 °C.

**<sup>1</sup>H NMR** (400 MHz, CDCl<sub>3</sub>) δ 8.88 (d, *J* = 2.2 Hz, 1H), 8.67 (dd, *J* = 4.8, 1.4 Hz, 1H), 7.93 – 7.88 (m, 2H), 7.78 (s, 1H), 7.53 (d, *J* = 7.7 Hz, 1H), 7.42 (dd, *J* = 7.8, 4.9 Hz, 1H), 7.37 – 7.30 (m, 1H), 6.99 (td, *J* = 7.7, 0.9 Hz, 1H), 1.67 (s, 9H).

**<sup>13</sup>C NMR** (100 MHz, CDCl<sub>3</sub>) δ 166.0, 150.4, 149.8, 149.1, 140.4, 136.2, 133.5, 130.7, 130.7, 128.1, 123.9, 123.5, 122.2, 120.9, 115.4, 84.4, 28.1.

**HRMS-ESI** (positive): *M* = C<sub>19</sub>H<sub>19</sub>N<sub>2</sub>O<sub>3</sub>, calculated (*M*+*H*) *m/z*: 323.1390, found: 323.1382.

**IR** (cm<sup>-1</sup>): 3055, 2975, 1721, 1459, 1154, 743.

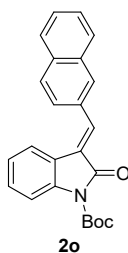

**tert-butyl (E)-3-(naphthalen-2-ylmethylene)-2-oxoindoline-1-carboxylate (2o)**

Yellow solid, yield 26% (0.46 g, 1.2 mmol), purified by EtOH recrystallization. The spectroscopic data corresponds to those previously reported in the literature.

**Mp** 98.8 - 99.4 °C.

**<sup>1</sup>H NMR** (400 MHz, CDCl<sub>3</sub>) δ 8.11 (s, 1H), 8.03 (s, 1H), 7.90 (ddd, *J* = 14.1, 8.9, 4.8 Hz, 4H), 7.72 (t, *J* = 7.2 Hz, 2H), 7.56 (p, *J* = 8.1 Hz, 2H), 7.32 (t, *J* = 7.9 Hz, 1H), 6.97 (t, *J* = 7.6 Hz, 1H), 1.69 (s, 9H).

**<sup>13</sup>C NMR** (100 MHz, CDCl<sub>3</sub>) δ 166.7, 149.3, 140.1, 138.3, 133.8, 133.0, 132.1, 130.0, 129.3, 128.4, 128.4, 127.9, 127.4, 126.8, 126.2, 126.1, 123.7, 122.3, 121.6, 115.2, 84.2, 28.1.

**HRMS-ESI** (positive): *M* = C<sub>24</sub>H<sub>21</sub>NNaO<sub>3</sub>, calculated (*M*+Na) *m/z*: 394.1414, found: 394.1411.

**IR** (cm<sup>-1</sup>): 3052, 2976, 1717, 1462, 1159, 740.

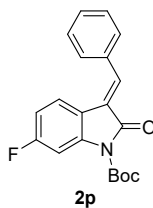

**tert-butyl (E)-3-benzylidene-6-fluoro-2-oxoindoline-1-carboxylate (2p)**

Yellow solid, yield 74% (1.26 g, 3.7 mmol), purified by EtOH recrystallization. The spectroscopic data corresponds to those previously reported in the literature.

**Mp** 159.0 - 159.8 °C.

**<sup>1</sup>H NMR** (400 MHz, CDCl<sub>3</sub>) δ 7.94 – 7.87 (m, 2H), 7.61 – 7.57 (m, 2H), 7.52 – 7.44 (m, 3H), 7.35 (dd, *J* = 8.8, 2.7 Hz, 1H), 7.01 (td, *J* = 8.9, 2.7 Hz, 1H), 1.66 (s, 9H).

**<sup>13</sup>C NMR** (100 MHz, CDCl<sub>3</sub>) δ 166.3, 159.1 (d, *J* = 241.90), 149.2, 139.8, 136.1 (d, *J* = 2.11), 134.0, 132.3, 130.2, 129.0, 128.9, 125.6 (d, *J* = 3.00), 122.7 (d, *J* = 8.95), 116.4 (d, *J* = 23.35), 116.3 (d, *J* = 7.97), 109.4 (d, *J* = 25.81), 84.4, 53.4, 28.1.

**<sup>19</sup>F NMR** (376 MHz, CDCl<sub>3</sub>) δ -118.25.

**HRMS-ESI** (positive): *M* = C<sub>20</sub>H<sub>18</sub>FNNaO<sub>3</sub>, calculated (*M*+Na) *m/z*: 362.1163, found: 362.1163.

**IR** (cm<sup>-1</sup>): 3063, 2986, 1721, 1466, 1145, 710.

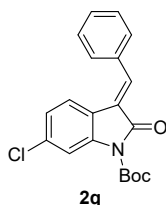

***tert*-butyl (*E*)-3-benzylidene-6-chloro-2-oxoindoline-1-carboxylate (2q)**

Yellow solid, yield 70% (1.24 g, 3.5 mmol), purified by EtOH recrystallization. The spectroscopic data corresponds to those previously reported in the literature.<sup>[1]</sup>

**<sup>1</sup>H NMR** (400 MHz, CDCl<sub>3</sub>) δ 7.83 (s, 1H), 7.79 (d, *J* = 8.8 Hz, 1H), 7.55 (s, 1H), 7.52 (d, *J* = 6.8 Hz, 2H), 7.41 (q, *J* = 5.8 Hz, 3H), 7.18 (d, *J* = 8.6 Hz, 1H), 1.58 (s, 9H).

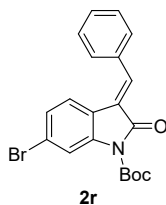

***tert*-butyl (*E*)-3-benzylidene-6-bromo-2-oxoindoline-1-carboxylate (2r)**

Yellow solid, yield 68% (1.36 g, 3.4 mmol), purified by EtOH recrystallization. The spectroscopic data corresponds to those previously reported in the literature.<sup>[1]</sup>



**<sup>1</sup>H NMR** (400 MHz, CDCl<sub>3</sub>) δ 7.91 (s, 1H), 7.80 (dd, *J* = 13.8, 5.4 Hz, 2H), 7.60 (dd, *J* = 7.1, 1.3 Hz, 2H), 7.53 – 7.46 (m, 3H), 7.42 (dd, *J* = 8.7, 2.1 Hz, 1H), 1.66 (s, 9H).

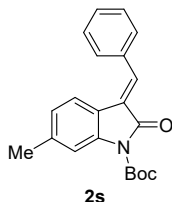

***tert*-butyl (*E*)-3-benzylidene-6-methyl-2-oxindoline-1-carboxylate(2s)**

Yellow solid, yield 75% (1.25 g, 3.5 mmol), purified by EtOH recrystallization.

**Mp** 134.5 – 135.4 °C.

**<sup>1</sup>H NMR** (400 MHz, CDCl<sub>3</sub>) δ 7.96 – 7.91 (m, 2H), 7.78 – 7.70 (m, 2H), 7.44 – 7.38 (m, 3H), 7.21 (t, *J* = 7.9 Hz, 1H), 6.97 (d, *J* = 7.7 Hz, 1H), 2.63 (s, 3H), 1.65 (s, 9H).

**<sup>13</sup>C NMR** (100 MHz, CDCl<sub>3</sub>) δ 164.1, 149.4, 141.7, 139.1, 133.9, 133.1, 131.4, 129.9, 128.5, 127.9, 127.1, 126.9, 121.6, 112.6, 84.1, 28.1, 22.0.

**HRMS-ESI** (positive): C<sub>21</sub>H<sub>21</sub>NNaO<sub>3</sub>, calculated (M+Na) *m/z*: 358.1423, found: 358.1429.

**IR** (cm<sup>-1</sup>): 3054, 1721, 1436, 1243, 1121, 734.

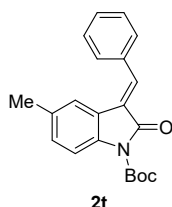

***tert*-butyl (*E*)-3-benzylidene-5-methyl-2-oxindoline-1-carboxylate(2t)**

Yellow solid, yield 72% (1.20 g, 3.6 mmol), purified by EtOH recrystallization.

**Mp** 157.5 – 158.8 °C.

**<sup>1</sup>H NMR** (400 MHz, CDCl<sub>3</sub>) δ 7.84 (s, 1H), 7.79 (d, *J* = 8.3 Hz, 1H), 7.63 (dd, *J* = 7.1, 1.2 Hz, 2H), 7.50 – 7.42 (m, 4H), 7.11 (dd, *J* = 8.3, 0.9 Hz, 1H), 2.22 (s, 3H), 1.67 (s, 9H).

**<sup>13</sup>C NMR** (100 MHz, CDCl<sub>3</sub>) δ 166.8, 149.3, 137.9, 137.8, 134.6, 133.1, 130.6, 129.7, 129.1, 128.6, 126.2, 122.8, 121.4, 114.9, 84.0, 28.1, 21.1.

**HRMS-ESI** (positive):  $M = C_{21}H_{21}NNaO_3$ , calculated (M+Na)  $m/z$ : 358.1421, found: 358.1427.

**IR** ( $cm^{-1}$ ): 2983, 1723, 1332, 1157, 757, 697.

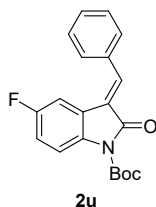

**tert-butyl (E)-3-benzylidene-5-fluoro-2-oxoindoline-1-carboxylate (2u)**

Yellow solid, yield 52% (0.88 g, 2.6 mmol), purified by EtOH recrystallization.

**Mp** 160.1 – 161.3 °C.

**$^1H$  NMR** (400 MHz,  $CDCl_3$ )  $\delta$  7.90 (dd,  $J = 9.7, 5.5$  Hz, 2H), 7.62 – 7.55 (m, 2H), 7.52 – 7.43 (m, 3H), 7.35 (dd,  $J = 8.8, 2.7$  Hz, 1H), 7.00 (td,  $J = 8.9, 2.7$  Hz, 1H), 1.66 (s, 9H).

**$^{13}C$  NMR** (100 MHz,  $CDCl_3$ )  $\delta$  164.1, 149.4, 141.7, 139.1, 133.9, 133.1, 131.4, 129.9, 128.5, 127.9, 127.1, 126.9, 121.6, 112.6, 84.1, 28.1, 22.0.

**$^{19}F$  NMR** (376 MHz,  $CDCl_3$ )  $\delta$  -118.23.

**HRMS-ESI** (positive):  $M = C_{20}H_{28}FNNaO_3$ , calculated (M+Na)  $m/z$ : 362.1263, found: 362.1267.

**IR** ( $cm^{-1}$ ): 3081, 1725, 1336, 1147, 737, 621.

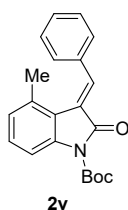

**tert-butyl (E)-3-benzylidene-4-methyl-2-oxoindoline-1-carboxylate(2v)**

Yellow solid, yield 72% (1.20 g, 3.6 mmol), purified by EtOH recrystallization.

**Mp** 178.5 – 179.3 °C.

**$^1H$  NMR** (400 MHz,  $CDCl_3$ )  $\delta$  7.84 (s, 1H), 7.79 (d,  $J = 8.3$  Hz, 1H), 7.63 (dd,  $J = 7.1, 1.2$  Hz, 2H), 7.50 – 7.43 (m, 4H), 7.11 (dd,  $J = 8.3, 0.9$  Hz, 1H), 2.22 (s, 3H), 1.67 (s, 9H).

**<sup>13</sup>C NMR** (100 MHz, CDCl<sub>3</sub>) δ 166.8, 149.3, 137.9, 137.8, 134.6, 133.1, 130.6, 129.7, 129.1, 128.6, 126.2, 122.8, 121.4, 114.9, 84.0, 28.1, 21.1.

**HRMS-ESI** (positive): M = C<sub>21</sub>H<sub>21</sub>NNaO<sub>3</sub>, calculated (M+Na) m/z: 358.1429, found: 358.1432.

**IR** (cm<sup>-1</sup>): 3201, 1745, 1224, 1163, 734, 654.

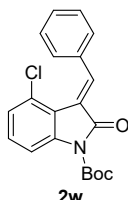

**tert-butyl (*E*)-3-benzylidene-4-chloro-2-oxindoline-1-carboxylate(2w)**

Yellow solid, yield 79% (1.41 g, 3.9 mmol), purified by EtOH recrystallization.

**Mp** 122.1 – 123.4 °C.

**<sup>1</sup>H NMR** (400 MHz, CDCl<sub>3</sub>) δ 8.62 (s, 1H), 7.92 (dd, *J* = 6.5, 2.7 Hz, 2H), 7.74 (dd, *J* = 8.0, 0.9 Hz, 1H), 7.35 (dd, *J* = 5.0, 1.8 Hz, 3H), 7.20 – 7.11 (m, 2H), 1.57 (s, 9H).

**<sup>13</sup>C NMR** (100 MHz, CDCl<sub>3</sub>) δ 163.2, 149.2, 143.9, 140.1, 133.5, 131.8, 130.6, 129.0, 128.5, 128.0, 126.1, 124.1, 120.2, 113.2, 84.6, 28.1.

**HRMS-ESI** (positive): M = C<sub>20</sub>H<sub>18</sub>ClNNaO<sub>3</sub>, calculated (M+Na) m/z: 378.0821, found: 378.0823.

**IR** (cm<sup>-1</sup>): 3066, 1729, 1442, 1251, 1130, 754.

Preparation of the *N*-Cbz protected Alkylidene Oxindoles.<sup>[3]</sup>

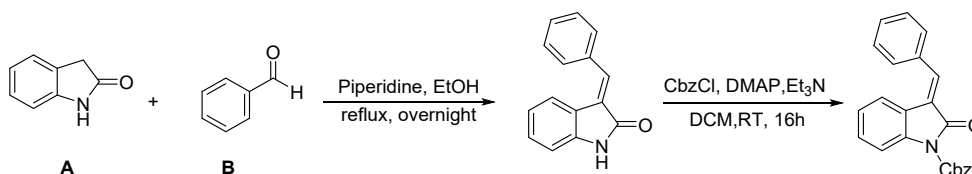

To oxindole **A** (20 mmol, 1 eq.) and aldehyde **B** (24 mmol, 1.2 eq.) in EtOH (30 mL) was added piperidine (2 mmol, 0.1 eq.). After refluxing for 8 hours, the reaction was cooled to room temperature. Crude product was collected by flash filtration. 4 mmol fraction of the crude benzylideneoxindole was diluted in DCM (40 mL, 0.1 M), DMAP was added portionwise (1.02 g, 2.1 mmol, 2.1 equiv.) and Et<sub>3</sub>N (1.2 mL, 2.1 mmol, 2.1 equiv.). After 5 min, CbzCl (1.2 mL,

2.1 mmol, 2.1 equiv.) was added dropwise at 0 °C and stirred at rt. After full consumption of the starting material, monitored by TLC (usually after 16h), the reaction was quenched with water. The organic layer was washed with 2×100 mL of water. The organic layer was dried with Na<sub>2</sub>SO<sub>4</sub> and concentrated under reduced pressure. The crude product was purified by column chromatography (PE/EA =10/1), giving the desired *N*-Cbz protected 3-benzyloxindole in 29% yield.

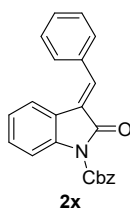

### benzyl (*E*)-3-benzylidene-2-oxindoline-1-carboxylate (**2x**)

Yellow solid, yield 27% (0.40 g, 1.1 mmol), The crude product was purified by column chromatography (PE/EA =10/1), giving the desired *N*-Cbz protected 3-benzyloxindole. The spectroscopic data corresponds to those previously reported in the literature.<sup>[3]</sup>

**<sup>1</sup>H NMR** (400 MHz, CDCl<sub>3</sub>) δ 7.98 (d, *J* = 8.2 Hz, 1H), 7.91 (s, 1H), 7.68 (d, *J* = 7.8 Hz, 1H), 7.63 (d, *J* = 6.6 Hz, 2H), 7.55 (d, *J* = 7.5 Hz, 2H), 7.50 – 7.44 (m, 3H), 7.41 (t, *J* = 7.4 Hz, 2H), 7.36 (d, *J* = 7.1 Hz, 1H), 7.33 – 7.29 (m, 1H), 7.01 (t, *J* = 7.7 Hz, 1H), 5.49 (s, 2H).

Preparation of the *N*-Ac protected Alkylidene Oxindoles.<sup>[4]</sup>

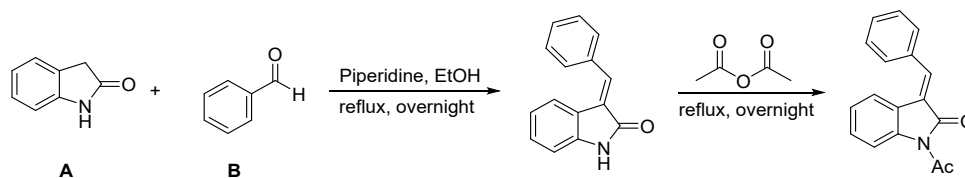

To oxindole A (20 mmol, 1 eq.) and aldehyde B (24 mmol, 1.2 eq.) in EtOH (30 mL) was added piperidine (2 mmol, 0.1 eq.). After refluxing overnight, the reaction was cooled to room temperature. Crude product was collected by flash filtration. 4.9 mmol fraction of the crude benzylideneoxindole was diluted in acetic anhydride (24 mL) was heated to 100 °C (bath temperature) with

stirring overnight, during which time the suspension cleared to a deep red-brown solution. The mixture was cooled and poured into 120 mL of H<sub>2</sub>O. A yellow-orange product precipitated and was dissolved by shaking with 30 mL of MTBE/Et<sub>2</sub>O = 1/1. The organic layer was separated, and the aqueous layer was extracted twice more with 30 mL of MTBE/Et<sub>2</sub>O = 1/1. The combined organic extracts were washed with aqueous 2M NaOH (2 × 30 mL), H<sub>2</sub>O (2 × 40 mL), and brine (1 × 30 mL), then dried over Na<sub>2</sub>SO<sub>4</sub>. Filtration and concentration under reduced pressure afforded a crude orange-red solid, which was recrystallized from EtOH, to afford the yellow needles in 38%.

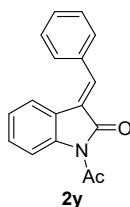

### **(E)-1-acetyl-3-benzylideneindolin-2-one (2y)**

Yellow needles, yield 38% (0.48 g, 1.8 mmol), purified by EtOH recrystallization. The spectroscopic data corresponds to those previously reported in the literature.<sup>[4]</sup>

**<sup>1</sup>H NMR** (400 MHz, CDCl<sub>3</sub>) δ 8.2 (d, *J* = 8.2 Hz, 1H), 7.8 (s, 1H), 7.6 (d, *J* = 7.8 Hz, 1H), 7.6 (d, *J* = 6.4 Hz, 2H), 7.4 (q, *J* = 5.9 Hz, 3H), 7.2 (t, *J* = 7.9 Hz, 1H), 6.9 (t, *J* = 7.6 Hz, 1H), 2.7 (s, 3H).

### **3.2 Preparation of 1a<sup>[5]</sup>**

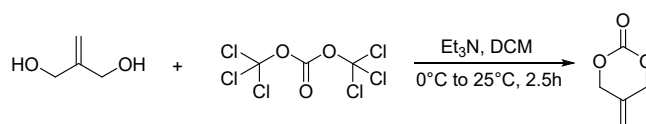

According to a previous reference: A solution of triphosgene (1.48 g, 5.0 mmol) in DCM (50.0 mL) was slowly added to a solution of 2-methylenepropane-1,3-diol (2.2 g, 25 mmol) and triethylamine (34.8 mL, 250 mmol) in DCM (250 mL) at 0 °C over 30 min. The resulting mixture was stirred for 2 h while gradually raising the temperature to 20 °C. The reaction was quenched with NH<sub>4</sub>Cl aq and extracted with DCM. The organic layer was dried over Na<sub>2</sub>SO<sub>4</sub>, filtered,

and concentrated under vacuum. The residue was chromatographed on silica gel with PE/EA = 2/1 to afford a white solid (1.2 g, 42% yield).

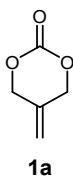

### 5-methylene-1,3-dioxan-2-one (**1a**)

White solid, yield 42% (1.2 g, 2.1 mmol), The crude product was purified by column chromatography (PE/EA = 2/1), giving the desired **1a**. The spectroscopic data corresponds to those previously reported in the literature.<sup>[5]</sup>  
**<sup>1</sup>H NMR** (400 MHz, CDCl<sub>3</sub>)  $\delta$  5.32 – 5.28 (m, 2H), 4.84 (d, *J* = 1.2 Hz, 4H).

### 3.3 Preparation of **1b**<sup>[6]</sup>

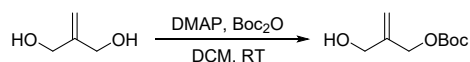

To a solution of freshly distilled 2-methylene propane-1,3-diol (2 g, 22.5 mmol), 4-DMAP (270 mg, 2.5 mmol) in DCM (20 mL), was added dropwise a solution of Boc<sub>2</sub>O (0.8M in DCM, 5.7 mL) at 0 °C. After 16 h stirring at rt, the reaction mixture was quenched with HCl 1M and extracted with DCM. The combined organic layers were washed with brine, dried over Na<sub>2</sub>SO<sub>4</sub> and concentrated under reduced pressure. Purification by flash column chromatography on silica gel (PE/EA = 4/1) afforded 1.84 g (43%) as a colourless oil.

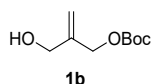

### *tert*-butyl (2-(hydroxymethyl)allyl) carbonate (**1b**)

colourless oil, yield 43% (1.84 g, 9.7 mmol), The crude product was purified by column chromatography (PE/EA = 4/1), giving the desired **1b**. The spectroscopic data corresponds to those previously reported in the literature.<sup>[6]</sup>  
**<sup>1</sup>H NMR** (400 MHz, CDCl<sub>3</sub>)  $\delta$  5.25 (s, 1H), 5.20 (s, 1H), 4.62 (s, 2H), 4.16 (s, 2H), 1.91 (s, 1H), 1.48 (s, 9H).

## 4. General procedure for the synthesis of products **3**

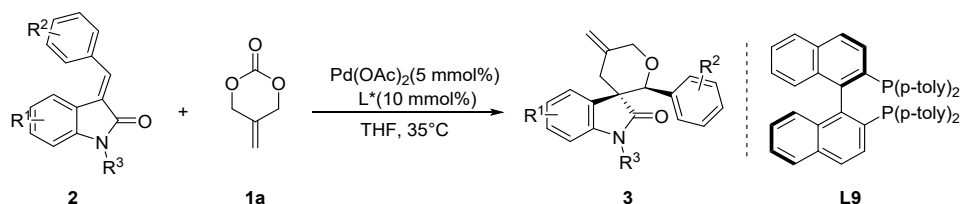

To an oven-dried Schlenk tube was added Pd(OAc)<sub>2</sub> (0.005 mmol), Chiral ligand **L9** (0.01 mmol) followed by the addition of THF (0.5 mL). The reaction mixture was allowed to stir for 30 mins at room temperature (25 °C), to the reaction mixture was then added methyleneindolinones **2** (0.1 mmol), 2-Methylidenetrimethylene **1a** (0.15 mmol). The reaction mixture was allowed to stir at 35 °C for 24 h and then directly purified by silica gel chromatography (PE/EA = 20/1 to 10/1) to provide the desired product **3**.

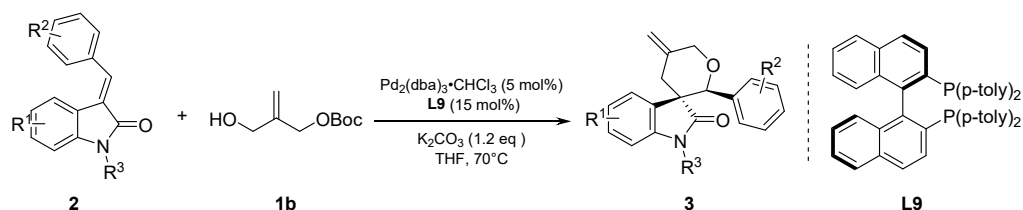

To an oven-dried Schlenk tube was added Pd<sub>2</sub>(dba)<sub>3</sub>•CHCl<sub>3</sub> (0.005 mmol), Chiral ligand **L9** (0.015 mmol) followed by the addition of THF (0.5 mL). The reaction mixture was allowed to stir for 30 mins at room temperature (25 °C), to the reaction mixture was then added methyleneindolinones **2** (0.1 mmol), 2-Methylidenetrimethylene **1a** (0.15 mmol), K<sub>2</sub>CO<sub>3</sub> (0.12 mmol). The reaction mixture was allowed to stir at 70 °C for 48 h and then directly purified by silica gel chromatography (PE/EA = 20/1 to 10/1) to provide the desired product **3**.

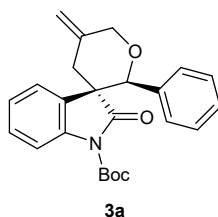

***tert*-butyl(2'*S*,3*S*)-5'-methylene-2-oxo-2'-phenyl-5',6'-dihydro-2'*H*,4'*H*-spiro[indoline-3,3'-pyran]-1-carboxylate (3a)**

Method A: **3a** (35.2 mg, 0.09 mmol) was obtained in 90% yield as a white solid. >20:1 *dr*, 90% *ee*, purified by silica gel column chromatography (PE/EA = 20/1).

Method B: 35.1mg, 0.09mmol, yield 90%, >20:1 *dr*, 80% *ee*.

**Mp** 115.9 - 116.7°C.

**<sup>1</sup>H NMR** (400 MHz, CDCl<sub>3</sub>) δ 7.67 (d, *J* = 7.4 Hz, 1H), 7.46 (d, *J* = 8.1 Hz, 1H), 7.19 (td, *J* = 7.9, 1.3 Hz, 1H), 7.13 (dd, *J* = 10.9, 4.1 Hz, 1H), 7.06 (t, *J* = 7.2 Hz, 1H), 6.99 (t, *J* = 7.4 Hz, 2H), 6.89 (d, *J* = 7.4 Hz, 2H), 5.19 (s, 1H), 4.94 (s, 2H), 4.65 (d, *J* = 12.6 Hz, 1H), 4.46 (d, *J* = 12.6 Hz, 1H), 3.25 (d, *J* = 13.8 Hz, 1H), 2.46 (d, *J* = 13.8 Hz, 1H), 1.55 (s, 9H).

**<sup>13</sup>C NMR** (100 MHz, CDCl<sub>3</sub>) δ 175.6, 148.5, 138.9, 138.2, 136.3, 128.25, 128.1, 127.8, 127.3, 126.5, 126.0, 123.6, 114.1, 113.5, 84.1, 83.7, 73.4, 54.8, 39.3, 28.0.

**HRMS-ESI** (positive): M = C<sub>24</sub>H<sub>25</sub>NNaO<sub>4</sub>, calculated (M+Na) *m/z*: 414.1676, found: 414.1679.

**IR** (cm<sup>-1</sup>): 3080, 1727, 1465, 1150, 750, 677.

**[α]<sub>D</sub><sup>25</sup>** = - 62.77 (c = 0.64, CHCl<sub>3</sub>).

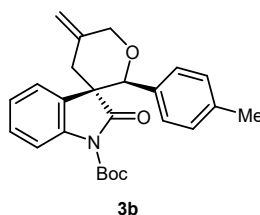

***tert*-butyl(2'*S*,3*S*)-5'-methylene-2-oxo-2'-(*p*-tolyl)-5',6'-dihydro-2'*H*,4'*H*-spiro[indoline-3,3'-pyran]-1-carboxylate (3b)**

Method A: **3b** (26.6 mg, 0.066 mol) was obtained in 66% yield as a white liquid. >20:1 *dr*, 85% *ee*, purified by silica gel column chromatography (PE/EA = 20/1).

Method B: 36.9mg, 0.091 mmol, yield 91%, >20:1 *dr*, 80% *ee*.



**<sup>1</sup>H NMR** (400 MHz, CDCl<sub>3</sub>) δ 7.70 – 7.62 (m, 1H), 7.49 (d, *J* = 8.0 Hz, 1H), 7.20 (td, *J* = 8.0, 1.3 Hz, 1H), 7.13 (dd, *J* = 10.9, 4.1 Hz, 1H), 6.78 (q, *J* = 8.3 Hz, 4H), 5.17 (s, 1H), 4.93 (s, 1H), 4.90 (s, 1H), 4.68 – 4.59 (m, 1H), 4.45 (d, *J* = 12.6 Hz, 1H), 3.23 (d, *J* = 13.8 Hz, 1H), 2.45 (d, *J* = 13.8 Hz, 1H), 2.16 (s, 3H), 1.55 (s, 9H).

**<sup>13</sup>C NMR** (100 MHz, CDCl<sub>3</sub>) δ 175.7, 148.5, 138.9, 138.2, 137.4, 133.3, 128.4, 128.0, 128.0, 126.4, 126.0, 123.6, 114.2, 113.4, 84.0, 83.7, 77.3, 77.0, 76.7, 73.4, 54.8, 39.4, 27.9, 21.0.

**HRMS-ESI** (positive): *M* = C<sub>25</sub>H<sub>27</sub>NNaO<sub>4</sub>, calculated (*M*+Na) *m/z*: 432.1832, found: 432.1839.

**HPLC** (IC, *n*-hex/2-propanol = 90/10, flow rate = 1.0 mL/min, *l* = 254 nm, *T* = 25 °C) *t<sub>R</sub>* = 5.26 min (major), *t<sub>R</sub>* = 6.43 min (minor).

**IR** (cm<sup>-1</sup>): 2980, 1732, 1250, 1152, 754, 731.

**[α]<sup>25</sup><sub>D</sub>** = - 60.35 (*c* = 0.35, CHCl<sub>3</sub>).

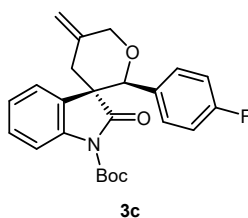

***tert*-butyl(2'*S*,3*S*)-2'-(4-fluorophenyl)-5'-methylene-2-oxo-5',6'-dihydro-2'*H*,4'*H*-spiro[indoline-3,3'-pyran]-1-carboxylate (3c)**

Method A: **3c** (36.3 mg, 0.089 mmol) was obtained in 89% yield as a yellow liquid. >20:1 *dr*, 80% *ee*, purified by silica gel column chromatography (PE/EA = 20/1).

Method B: 34.7mg, 0.085 mmol, yield 85%, >20:1 *dr*, 77% *ee*.

**<sup>1</sup>H NMR** (400 MHz, CDCl<sub>3</sub>) δ 7.65 (dd, *J* = 7.5, 1.1 Hz, 1H), 7.48 (d, *J* = 8.0 Hz, 1H), 7.21 (td, *J* = 7.9, 1.4 Hz, 1H), 7.12 (td, *J* = 7.5, 1.0 Hz, 1H), 6.89 – 6.83 (m, 2H), 6.71 – 6.65 (m, 2H), 5.18 (d, *J* = 1.3 Hz, 1H), 4.94 (s, 1H), 4.91 (s, 1H), 4.64 (dd, *J* = 12.6, 1.5 Hz, 1H), 4.45 (d, *J* = 12.6 Hz, 1H), 3.23 (dd, *J* = 13.8, 1.1 Hz, 1H), 2.45 (dd, *J* = 13.8, 1.5 Hz, 1H), 1.56 (s, 9H).

**<sup>13</sup>C NMR** (100 MHz, CDCl<sub>3</sub>) δ 175.5, 162.2, 148.4, 138.8, 137.9, 132.2, 128.3,

128.3, 128.1, 125.9, 123.7, 114.3, 114.1, 113.6, 84.3, 83.0, 73.4, 54.7, 39.3, 28.0.

**<sup>19</sup>F NMR** (376 MHz, CDCl<sub>3</sub>) δ -114.09.

**HRMS-ESI** (positive): M = C<sub>24</sub>H<sub>24</sub>FNNaO<sub>4</sub>, calculated (M+Na) m/z: 432.1582, found: 432.1585.

**HPLC** (IC, *n*-hex/2-propanol = 90/10, flow rate = 1.0 mL/min, I = 254 nm, T = 25 °C) t<sub>R</sub> = 4.47 min (major), t<sub>R</sub> = 5.34 min (minor).

**IR** (cm<sup>-1</sup>): 3076, 1733, 1251, 1152, 1090, 756.

[α]<sub>D</sub><sup>25</sup> = -46.44 (c = 0.52, CHCl<sub>3</sub>).

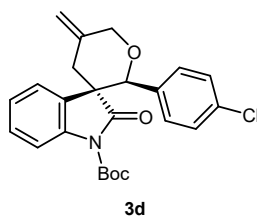

***tert*-butyl(2'*S*,3*S*)-2'-(4-chlorophenyl)-5'-methylene-2-oxo-5',6'-dihydro-2'*H*,4'*H*-spiro[indoline-3,3'-pyran]-1-carboxylate (3d)**

Method A: **3d** (38.4 mg, 0.09 mmol) was obtained in 90% yield as a white solid. >20:1 *dr*, 87% *ee*, purified by silica gel column chromatography (PE/EA = 20/1).

Method B: 38.6mg, 0.091mmol, yield 91%, >20:1 *dr*, 80% *ee*.

**Mp** 117.6 - 118.6°C.

**<sup>1</sup>H NMR** (400 MHz, CDCl<sub>3</sub>) δ 7.63 (d, *J* = 7.4 Hz, 1H), 7.48 (d, *J* = 8.1 Hz, 1H), 7.22 (dd, *J* = 11.3, 4.4 Hz, 1H), 7.12 (t, *J* = 7.5 Hz, 1H), 6.97 (d, *J* = 8.5 Hz, 2H), 6.84 (d, *J* = 8.5 Hz, 2H), 5.18 (s, 1H), 4.93 (s, 1H), 4.91 (s, 1H), 4.64 (d, *J* = 12.6 Hz, 1H), 4.45 (d, *J* = 12.6 Hz, 1H), 3.23 (d, *J* = 13.8 Hz, 1H), 2.45 (d, *J* = 13.8 Hz, 1H), 1.56 (s, 9H).

**<sup>13</sup>C NMR** (100 MHz, CDCl<sub>3</sub>) δ 175.5, 148.3, 138.8, 137.8, 134.9, 133.6, 128.3, 127.9, 127.5, 125.9, 123.8, 114.3, 113.8, 84.4, 82.9, 73.4, 54.6, 39.3, 29.7, 28.0.

**HRMS-ESI** (positive): M = C<sub>24</sub>H<sub>24</sub>ClNNaO<sub>4</sub>, calculated (M+Na) m/z: 448.1286, found: 448.1281.

**HPLC** (IC, *n*-hex/2-propanol = 90/10, flow rate = 1.0 mL/min,  $\lambda$  = 254 nm, T = 25 °C)  $t_R$  = 4.66 min (major),  $t_R$  = 5.82 min (minor).

**IR** (cm<sup>-1</sup>): 2985, 1724, 1293, 1150, 756, 733.

**$[\alpha]^{25}_D$**  = - 51.00 (c = 0.68, CHCl<sub>3</sub>).

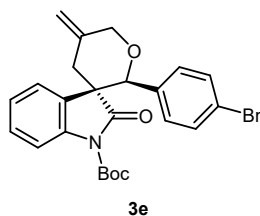

***tert*-butyl(2'*S*,3*S*)-2'-(4-bromophenyl)-5'-methylene-2-oxo-5',6'-dihydro-2'*H*,4'*H*-spiro[indoline-3,3'-pyran]-1-carboxylate (3e)**

Method A: **3e** (39.7 mg, 0.084 mmol) was obtained in 84% yield as a white solid. >20:1 *dr*, 87% *ee*, purified by silica gel column chromatography (PE/EA = 20/1).

Method B: 30.7mg, 0.065 mmol, yield 65%, >20:1 *dr*, 78% *ee*.

**Mp** 126.8 - 127.4°C.

**<sup>1</sup>H NMR** (400 MHz, CDCl<sub>3</sub>)  $\delta$  7.63 (d, *J* = 6.9 Hz, 1H), 7.47 (d, *J* = 8.1 Hz, 1H), 7.24 – 7.19 (m, 1H), 7.12 (t, *J* = 7.4 Hz, 3H), 6.78 (d, *J* = 8.5 Hz, 2H), 5.18 (s, 1H), 4.93 (s, 1H), 4.89 (s, 1H), 4.63 (d, *J* = 12.7 Hz, 1H), 4.44 (d, *J* = 12.6 Hz, 1H), 3.22 (d, *J* = 13.8 Hz, 1H), 2.45 (d, *J* = 13.8 Hz, 1H), 1.56 (s, 9H).

**<sup>13</sup>C NMR** (100 MHz, CDCl<sub>3</sub>)  $\delta$  175.5, 148.3, 138.8, 137.7, 135.5, 130.4, 128.3, 128.2, 127.8, 125.9, 123.8, 121.9, 114.3, 113.8, 84.4, 83.0, 73.4, 54.6, 39.4, 28.0.

**HRMS-ESI** (positive): M = C<sub>24</sub>H<sub>24</sub>BrNNaO<sub>4</sub>, calculated (M+Na) *m/z*: 492.0781, found: 492.0791.

**HPLC** (IC, *n*-hex/2-propanol = 90/10, flow rate = 1.0 mL/min,  $\lambda$  = 254 nm, T = 25 °C)  $t_R$  = 4.80 min (major),  $t_R$  = 6.08 min (minor).

**IR** (cm<sup>-1</sup>): 2977, 1732, 1250, 1147, 752, 731.

**$[\alpha]^{25}_D$**  = - 46.63 (c = 0.73, CHCl<sub>3</sub>).

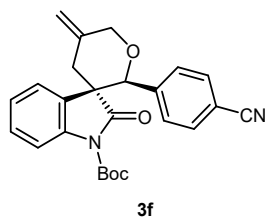

***tert*-butyl(2'*S*,3*S*)-2'-(4-cyanophenyl)-5'-methylene-2-oxo-5',6'-dihydro-2'*H*,4'*H*-spiro[indoline-3,3'-pyran]-1-carboxylate (3f)**

**3f** (36.6 mg, 0.088 mmol) was obtained in 88% yield as a white solid. >20:1 *dr*, 75% *ee*, purified by silica gel column chromatography (PE/EA = 20/1).

**Mp** 65.1 - 66.2°C.

**<sup>1</sup>H NMR** (400 MHz, CDCl<sub>3</sub>) δ 7.62 (dd, *J* = 7.5, 1.1 Hz, 1H), 7.44 (d, *J* = 8.0 Hz, 1H), 7.32 – 7.27 (m, 2H), 7.20 (td, *J* = 7.9, 1.4 Hz, 1H), 7.11 (td, *J* = 7.6, 1.0 Hz, 1H), 7.04 (d, *J* = 8.3 Hz, 2H), 5.20 (s, 1H), 4.98 (s, 1H), 4.95 (s, 1H), 4.65 (dd, *J* = 12.6, 1.4 Hz, 1H), 4.45 (d, *J* = 12.6 Hz, 1H), 3.23 (dd, *J* = 13.8, 0.9 Hz, 1H), 2.46 (dd, *J* = 13.8, 1.4 Hz, 1H), 1.56 (s, 9H).

**<sup>13</sup>C NMR** (100 MHz, CDCl<sub>3</sub>) δ 175.2, 148.2, 141.7, 138.5, 137.2, 131.0, 128.5, 127.3, 127.2, 125.8, 123.9, 118.5, 114.3, 114.1, 111.5, 84.6, 82.6, 73.2, 54.5, 39.4, 27.9.

**HRMS-ESI** (positive): *M* = C<sub>25</sub>H<sub>24</sub>N<sub>2</sub>NaO<sub>4</sub>, calculated (*M*+Na) *m/z*: 439.1628, found: 439.1628.

**HPLC** (IC, *n*-hex/2-propanol = 90/10, flow rate = 1.0 mL/min, I = 254 nm, T = 25 °C) *t<sub>R</sub>* = 10.68 min (major), *t<sub>R</sub>* = 12.49 min (minor).

**IR** (cm<sup>-1</sup>): 3081, 1751, 1251, 1149, 1092, 756.

**[α]<sup>25</sup><sub>D</sub>** = - 42.04 (c = 0.66, CHCl<sub>3</sub>).

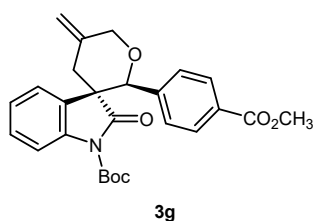

***tert*-butyl(2'*S*,3*S*)-2'-(4-(methoxycarbonyl)phenyl)-5'-methylene-2-oxo-5',6'-dihydro-2'*H*,4'*H*-spiro[indoline-3,3'-pyran]-1-carboxylate (3g)**

**3g** (37.8 mg, 0.084 mmol) was obtained in 84% yield as a white liquid. >20:1

*dr*, 85% *ee*, purified by silica gel column chromatography (PE/EA = 20/1).

**<sup>1</sup>H NMR** (400 MHz, CDCl<sub>3</sub>) δ 7.69 – 7.62 (m, 3H), 7.43 (d, *J* = 7.7 Hz, 1H), 7.18 (td, *J* = 7.9, 1.5 Hz, 1H), 7.11 (td, *J* = 7.5, 1.1 Hz, 1H), 6.99 (d, *J* = 8.3 Hz, 2H), 5.19 (s, 1H), 4.99 (s, 1H), 4.94 (s, 1H), 4.65 (dd, *J* = 12.6, 1.3 Hz, 1H), 4.45 (d, *J* = 12.6 Hz, 1H), 3.81 (s, 3H), 3.24 (d, *J* = 13.8 Hz, 1H), 2.45 (dd, *J* = 13.8, 1.3 Hz, 1H), 1.54 (s, 9H).

**<sup>13</sup>C NMR** (100 MHz, CDCl<sub>3</sub>) δ 175.4, 166.7, 148.3, 141.5, 138.6, 137.6, 129.4, 128.6, 128.3, 127.7, 126.5, 125.9, 123.8, 114.2, 113.8, 84.4, 83.0, 73.3, 54.6, 52.0, 39.4, 27.9.

**HRMS-ESI** (positive): *M* = C<sub>26</sub>H<sub>27</sub>NNaO<sub>6</sub>, calculated (*M*+Na) *m/z*: 472.1731, found: 472.1719.

**HPLC** (IC, *n*-hex/2-propanol = 90/10, flow rate = 1.0 mL/min, *l* = 254 nm, *T* = 25 °C) *t<sub>R</sub>* = 10.12 min (major), *t<sub>R</sub>* = 14.07 min (minor).

**IR** (cm<sup>-1</sup>): 2980, 1732, 1250, 1152, 754, 731.

[α]<sub>D</sub><sup>25</sup> = - 42.6 (*c* = 0.77, CHCl<sub>3</sub>).

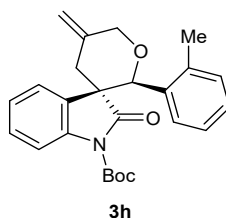

***tert*-butyl(2'*S*,3*S*)-5'-methylene-2-oxo-2'-(*o*-tolyl)-5',6'-dihydro-2'*H*,4'*H*-spiro[indoline-3,3'-pyran]-1-carboxylate (3h)**

Method A: **3h** (21.9 mg, 0.054 mmol) was obtained in 54% yield as a yellow solid. >20:1 *dr*, 92% *ee*, purified by silica gel column chromatography (PE/EA = 20/1).

**Mp** 141.5 - 142.5 °C.

**<sup>1</sup>H NMR** (400 MHz, CDCl<sub>3</sub>) δ 7.75 (d, *J* = 7.3 Hz, 1H), 7.54 (d, *J* = 8.1 Hz, 1H), 7.32 – 7.22 (m, 1H), 7.18 (t, *J* = 7.5 Hz, 1H), 7.02 – 6.89 (m, 2H), 6.69 – 6.58 (m, 1H), 6.39 (d, *J* = 7.9 Hz, 1H), 5.21 (s, 1H), 5.19 (s, 1H), 4.97 (s, 1H), 4.64 (d, *J* = 12.7 Hz, 1H), 4.49 (d, *J* = 12.7 Hz, 1H), 3.29 (d, *J* = 13.9 Hz, 1H), 2.51 (t, *J* = 12.2 Hz, 1H), 2.38 (s, 3H), 1.50 (s, 9H).

**<sup>13</sup>C NMR** (100 MHz, CDCl<sub>3</sub>) δ 175.2, 148.5, 139.3, 138.4, 135.3, 134.3, 129.9, 128.5, 128.3, 127.8, 127.1, 126.3, 124.7, 123.7, 114.2, 113.4, 83.8, 79.5, 77.3, 77.0, 76.7, 73.8, 53.9, 39.6, 27.9, 19.9.

**HRMS-ESI** (positive): M = C<sub>25</sub>H<sub>27</sub>NNaO<sub>4</sub>, calculated (M+Na) m/z: 428.1832, found: 428.1827.

**HPLC** (IC, *n*-hex/2-propanol = 90/10, flow rate = 1.0 mL/min, I = 254 nm, T = 25 °C) t<sub>R</sub> = 4.36 min (major), t<sub>R</sub> = 4.75 min (minor).

**IR** (cm<sup>-1</sup>): 3073, 1734, 1282, 1152, 751, 732.

[α]<sub>D</sub><sup>25</sup> = -26.44 (c = 0.40, CHCl<sub>3</sub>).

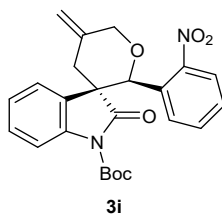

***tert*-butyl(2'*S*,3*S*)-5'-methylene-2'-(2-nitrophenyl)-2-oxo-5',6'-dihydro-2'*H*,4'*H*-spiro[indoline-3,3'-pyran]-1-carboxylate (3i)**

**3i** (39.5 mg, 0.08 mmol) was obtained in 91% yield as a white solid. >20:1 *dr*, 80% *ee*, purified by silica gel column chromatography (PE/EA = 10/1).

**Mp** 119.0 - 119.5 °C.

**<sup>1</sup>H NMR** (400 MHz, CDCl<sub>3</sub>) δ 7.69 (dd, *J* = 7.5, 1.0 Hz, 1H), 7.64 (dd, *J* = 11.6, 4.6 Hz, 2H), 7.29 – 7.21 (m, 2H), 7.16 (td, *J* = 7.6, 1.0 Hz, 1H), 7.10 – 7.04 (m, 1H), 6.82 (dd, *J* = 8.0, 1.2 Hz, 1H), 5.90 (s, 1H), 5.22 (s, 1H), 4.97 (s, 1H), 4.68 (d, *J* = 12.7 Hz, 1H), 4.59 (d, *J* = 12.8 Hz, 1H), 3.24 (dd, *J* = 13.9, 0.9 Hz, 1H), 2.48 (dd, *J* = 13.8, 1.0 Hz, 1H), 1.59 (s, 9H).

**<sup>13</sup>C NMR** (100 MHz, CDCl<sub>3</sub>) δ 173.7, 148.7, 148.5, 139.1, 137.6, 131.2, 129.7, 129.0, 128.7, 128.6, 127.6, 126.1, 123.8, 123.7, 114.4, 114.0, 84.4, 73.7, 54.3, 40.0, 27.8.

**HRMS-ESI** (positive): M = C<sub>24</sub>H<sub>24</sub>N<sub>2</sub>NaO<sub>6</sub>, calculated (M+Na) m/z: 459.1527, found: 459.1522.

**HPLC** (IC, *n*-hex/2-propanol = 80/20, flow rate = 1.0 mL/min, I = 254 nm, T = 25 °C) t<sub>R</sub> = 10.53 min (major), t<sub>R</sub> = 15.27 min (minor).

IR (cm<sup>-1</sup>): 3078, 2980, 1727, 1534, 1152, 788, 692.

[ $\alpha$ ]<sub>D</sub><sup>25</sup> = + 152.87 (c = 0.64, CHCl<sub>3</sub>).

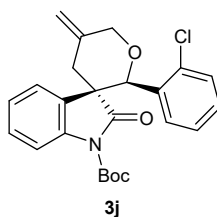

**tert-butyl(2'R,3S)-2'-(2-chlorophenyl)-5'-methylene-2-oxo-5',6'-dihydro-2'H,4'H-spiro[indoline-3,3'-pyran]-1-carboxylate (3j)**

**3j** (36.6 mg, 0.086 mmol) was obtained in 86% yield as a white solid. >20:1 *dr*, 60% *ee*, purified by silica gel column chromatography (PE/EA = 20/1).

**Mp** 134.8 - 135.9°C.

**<sup>1</sup>H NMR** (400 MHz, CDCl<sub>3</sub>)  $\delta$  7.72 (dd, J = 7.5, 0.8 Hz, 1H), 7.57 (d, J = 8.1 Hz, 1H), 7.27 (td, J = 7.9, 1.3 Hz, 1H), 7.18 (dtd, J = 8.3, 7.8, 0.9 Hz, 2H), 7.01 (td, J = 7.9, 1.6 Hz, 1H), 6.76 – 6.68 (m, 1H), 6.45 (dd, J = 8.0, 1.4 Hz, 1H), 5.51 (s, 1H), 5.19 (s, 1H), 4.99 (s, 1H), 4.66 – 4.58 (m, 1H), 4.51 (d, J = 12.7 Hz, 1H), 3.33 (d, J = 14.0 Hz, 1H), 2.51 (dd, J = 14.0, 1.0 Hz, 1H), 1.52 (s, 9H).

**<sup>13</sup>C NMR** (100 MHz, CDCl<sub>3</sub>)  $\delta$  174.0, 148.7, 139.4, 138.3, 133.8, 132.7, 129.2, 128.9, 128.9, 128.5, 128.2, 126.2, 125.7, 123.7, 114.3, 113.6, 84.0, 79.1, 73.8, 53.6, 39.3, 28.0.

**HRMS-ESI** (positive): M = C<sub>24</sub>H<sub>24</sub>ClNNaO<sub>4</sub>, calculated (M+Na) m/z: 448.1286, found: 448.1279.

**HPLC** (IC, *n*-hex/2-propanol = 90/10, flow rate = 1.0 mL/min, I = 254 nm, T = 25 °C) *t*<sub>R</sub> = 4.96 min (major), *t*<sub>R</sub> = 6.16 min (minor).

IR (cm<sup>-1</sup>): 3075, 1721, 1283, 1152, 845, 755.

[ $\alpha$ ]<sub>D</sub><sup>25</sup> = - 10.38 (c = 0.68, CHCl<sub>3</sub>).

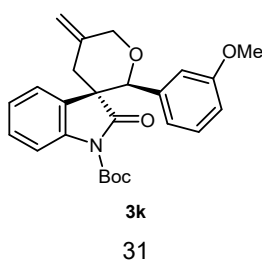

***tert*-butyl(2'*S*,3*S*)-2'-(3-methoxyphenyl)-5'-methylene-2-oxo-5',6'-dihydro-2'*H*,4'*H*-spiro[indoline-3,3'-pyran]-1-carboxylate (3k)**

Method A: **3k** (31.4 mg, 0.075 mmol) was obtained in 75% yield as a white solid. >20:1 *dr*, 86% *ee*, purified by silica gel column chromatography (PE/EA = 20/1).

Method B: 38.3mg, yield 91%, >20:1 *dr*, 80% *ee*.

**Mp** 146.6 - 147.6°C.

**<sup>1</sup>H NMR** (400 MHz, CDCl<sub>3</sub>) δ 7.82 (d, *J* = 8.1 Hz, 1H), 7.47 (dd, *J* = 7.5, 1.0 Hz, 1H), 7.31 (td, *J* = 8.1, 1.4 Hz, 1H), 7.10 (td, *J* = 7.6, 0.9 Hz, 1H), 5.02 (d, *J* = 1.2 Hz, 1H), 4.70 (s, 1H), 4.42 (dd, *J* = 12.3, 1.7 Hz, 1H), 4.18 (d, *J* = 12.3 Hz, 1H), 3.69 (d, *J* = 6.0 Hz, 1H), 2.92 (d, *J* = 13.4 Hz, 1H), 2.17 (dd, *J* = 13.4, 1.7 Hz, 1H), 1.64 (s, 9H), 1.55 – 1.43 (m, 4H), 1.16 (d, *J* = 10.4 Hz, 1H), 1.07 – 0.83 (m, 6H).

**<sup>13</sup>C NMR** (100 MHz, CDCl<sub>3</sub>) δ 176.4, 149.1, 138.4, 138.3, 129.5, 127.9, 125.9, 123.9, 114.6, 112.7, 85.3, 84.4, 72.9, 52.6, 43.0, 40.7, 29.7, 29.0, 28.1, 26.1, 26.0, 25.8.

**HRMS-ESI** (positive): *M* = C<sub>25</sub>H<sub>27</sub>NNaO<sub>5</sub>, calculated (*M*+Na) *m/z*: 444.1781, found: 444.1790.

**HPLC** (IC, *n*-hex/2-propanol = 90/10, flow rate = 1.0 mL/min, I = 254 nm, T = 25 °C) *t<sub>R</sub>* = 6.42 min (major), *t<sub>R</sub>* = 8.28 min (minor).

**IR** (cm<sup>-1</sup>): 3071, 1729, 1297, 1150, 1094, 755.

**[α]<sup>25</sup><sub>D</sub>** = - 62.89 (c = 0.66, CHCl<sub>3</sub>).

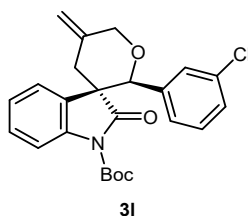

***tert*-butyl(2'*S*,3*S*)-2'-(3-chlorophenyl)-5'-methylene-2-oxo-5',6'-dihydro-2'*H*,4'*H*-spiro[indoline-3,3'-pyran]-1-carboxylate (3l)**

**3l** (31.2 mg, 0.073 mmol) was obtained in 73% yield as a white solid. >20:1 *dr*, 83% *ee*, purified by silica gel column chromatography (PE/EA = 20/1).



**Mp** 129.5 - 130.4°C.

**<sup>1</sup>H NMR** (400 MHz, CDCl<sub>3</sub>) δ 7.63 (d, *J* = 7.4 Hz, 1H), 7.51 (d, *J* = 8.1 Hz, 1H), 7.20 (dd, *J* = 11.3, 4.3 Hz, 1H), 7.13 (t, *J* = 7.5 Hz, 1H), 7.03 (d, *J* = 7.9 Hz, 1H), 6.92 (t, *J* = 7.8 Hz, 2H), 6.79 (d, *J* = 7.7 Hz, 1H), 5.19 (s, 1H), 4.94 (s, 1H), 4.90 (s, 1H), 4.64 (d, *J* = 12.6 Hz, 1H), 4.44 (d, *J* = 12.6 Hz, 1H), 3.22 (d, *J* = 13.8 Hz, 1H), 2.45 (d, *J* = 13.8 Hz, 1H), 1.57 (s, 9H).

**<sup>13</sup>C NMR** (100 MHz, CDCl<sub>3</sub>) δ 175.3, 148.5, 138.7, 138.4, 137.7, 133.2, 128.5, 128.3, 127.9, 127.8, 126.7, 125.8, 124.6, 123.8, 114.1, 113.7, 84.3, 82.8, 73.3, 54.6, 39.2, 27.9.

**HRMS-ESI** (positive): *M* = C<sub>24</sub>H<sub>24</sub>CINNaO<sub>4</sub>, calculated (*M*+Na) *m/z*: 448.1286, found: 448.1279.

**HPLC** (IC, *n*-hex/2-propanol = 90/10, flow rate = 1.0 mL/min, *l* = 254 nm, *T* = 25 °C) *t<sub>R</sub>* = 4.31 min (major), *t<sub>R</sub>* = 5.13 min (minor).

**IR** (cm<sup>-1</sup>): 2979, 1732, 1253, 1148, 754, 730.

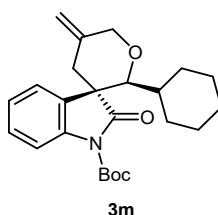

***tert*-butyl(2'*S*,3*S*)-2'-cyclohexyl-5'-methylene-2-oxo-5',6'-dihydro-2'*H*,4'*H*-spiro[indoline-3,3'-pyran]-1-carboxylate (3m)**

**3m** (32.3 mg, 0.081mmol) was obtained in 81% yield as a white liquid. >20:1 *dr*, 70% *ee*, purified by silica gel column chromatography (PE/EA = 20/1).

**<sup>1</sup>H NMR** (400 MHz, CDCl<sub>3</sub>) δ 7.82 (d, *J* = 8.1 Hz, 1H), 7.47 (dd, *J* = 7.5, 1.0 Hz, 1H), 7.31 (td, *J* = 8.1, 1.4 Hz, 1H), 7.10 (td, *J* = 7.6, 0.9 Hz, 1H), 5.02 (d, *J* = 1.2 Hz, 1H), 4.70 (s, 1H), 4.42 (dd, *J* = 12.3, 1.7 Hz, 1H), 4.18 (d, *J* = 12.3 Hz, 1H), 3.69 (d, *J* = 6.0 Hz, 1H), 2.92 (d, *J* = 13.4 Hz, 1H), 2.17 (dd, *J* = 13.4, 1.7 Hz, 1H), 1.64 (s, 9H), 1.55 – 1.43 (m, 4H), 1.16 (d, *J* = 10.4 Hz, 1H), 1.07 – 0.83 (m, 6H).

**<sup>13</sup>C NMR** (100 MHz, CDCl<sub>3</sub>) δ 176.4, 149.1, 138.4, 138.3, 129.5, 127.9, 125.9, 123.9, 114.6, 112.7, 85.3, 84.4, 72.9, 52.6, 43.0, 40.7, 29.7, 29.0, 28.1, 26.1,

26.0, 25.8.

**HRMS-ESI** (positive):  $M = C_{24}H_{31}NNaO_4$ , calculated (M+Na)  $m/z$ : 420.2145, found: 420.2145.

**HPLC** (IC, *n*-hex/2-propanol = 99/1, flow rate = 1.0 mL/min,  $\lambda = 254$  nm,  $T = 25$  °C)  $t_R = 4.67$  min (major),  $t_R = 5.11$  min (minor).

**IR** ( $cm^{-1}$ ): 3550, 2927, 1733, 1283, 1152, 756.

$[\alpha]_D^{25} = -33.08$  ( $c = 0.64$ ,  $CHCl_3$ ).

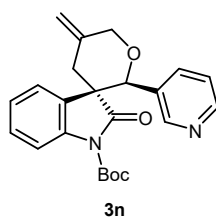

***tert*-butyl(2'*S*,3*S*)-5'-methylene-2-oxo-2'-(pyridin-3-yl)-5',6'-dihydro-2'*H*,4'*H*-spiro[indoline-3,3'-pyran]-1-carboxylate (3n)**

**3n** (36.1 mg, 0.092 mmol) was obtained in 92% yield as a white solid. >20:1 *dr*, 82% *ee*, purified by silica gel column chromatography (PE/EA = 20/1).

**Mp** 91.5 - 92.4 °C.

**<sup>1</sup>H NMR** (400 MHz,  $CDCl_3$ )  $\delta$  8.30 (dd,  $J = 4.8, 1.6$  Hz, 1H), 8.18 (d,  $J = 1.9$  Hz, 1H), 7.65 (dd,  $J = 7.4, 0.9$  Hz, 1H), 7.49 (d,  $J = 8.1$  Hz, 1H), 7.20 (td,  $J = 7.9, 1.4$  Hz, 1H), 7.14 (dt,  $J = 14.2, 4.6$  Hz, 2H), 6.90 (dd,  $J = 7.9, 4.8$  Hz, 1H), 5.19 (s, 1H), 4.94 (s, 2H), 4.64 (d,  $J = 12.7$  Hz, 1H), 4.44 (d,  $J = 12.6$  Hz, 1H), 3.22 (d,  $J = 13.8$  Hz, 1H), 2.47 (d,  $J = 13.8$  Hz, 1H), 1.55 (s, 9H).

**<sup>13</sup>C NMR** (100 MHz,  $CDCl_3$ )  $\delta$  175.0, 149.2, 148.3, 148.0, 138.7, 137.5, 134.0, 132.0, 128.5, 127.4, 125.9, 123.9, 122.2, 114.3, 113.9, 84.4, 81.5, 73.3, 54.5, 39.3, 27.9.

**HRMS-ESI** (positive):  $M = C_{23}H_{25}N_2O_4$ , calculated (M+H)  $m/z$ : 393.1809, found: 393.1806.

**HPLC** (IC, *n*-hex/2-propanol = 99/1, flow rate = 1.0 mL/min,  $\lambda = 254$  nm,  $T = 25$  °C)  $t_R = 15.77$  min (minor),  $t_R = 16.84$  min (major).

**IR** ( $cm^{-1}$ ): 2979, 1756, 1283, 1152, 1092, 776.

$[\alpha]_D^{25} = -52.04$  ( $c = 0.53$ ,  $CHCl_3$ ).

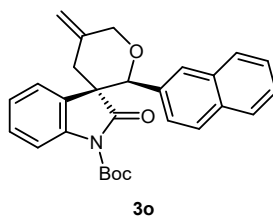

***tert*-butyl(2'*S*,3*S*)-5'-methylene-2'-(naphthalen-2-yl)-2-oxo-5',6'-dihydro-2'*H*,4'*H*-spiro[indoline-3,3'-pyran]-1-carboxylate (3o)**

Method A: **3o** (41.4 mg, 0.094 mmol) was obtained in 94% yield as a white solid. >20:1 *dr*, 86% *ee*, purified by silica gel column chromatography (PE/EA = 20/1).

Method B: 40.2mg, yield 91%, >20:1 *dr*, 80% *ee*.

**Mp** 83.0 - 84.2°C.

**<sup>1</sup>H NMR** (400 MHz, CDCl<sub>3</sub>) δ 7.78 – 7.72 (m, 1H), 7.68 – 7.59 (m, 2H), 7.48 – 7.42 (m, 2H), 7.40 – 7.31 (m, 3H), 7.16 (dd, *J* = 5.5, 3.6 Hz, 2H), 6.98 (dd, *J* = 8.7, 0.9 Hz, 1H), 5.22 (s, 1H), 5.13 (s, 1H), 4.97 (s, 1H), 4.71 (d, *J* = 12.5 Hz, 1H), 4.53 (d, *J* = 12.6 Hz, 1H), 3.32 (d, *J* = 13.7 Hz, 1H), 2.50 (d, *J* = 13.7 Hz, 1H), 1.43 (s, 9H).

**<sup>13</sup>C NMR** (100 MHz, CDCl<sub>3</sub>) δ 175.6, 148.3, 138.8, 138.1, 133.9, 132.8, 132.4, 128.2, 128.1, 128.0, 127.3, 126.8, 126.0, 125.8, 125.6, 124.1, 123.6, 114.2, 113.5, 84.0, 83.8, 73.5, 54.9, 39.5, 27.8.

**HRMS-ESI** (positive): *M* = C<sub>28</sub>H<sub>27</sub>NNaO<sub>4</sub>, calculated (*M*+Na) *m/z*: 464.1832, found: 464.1846.

**HPLC** (IC, *n*-hex/2-propanol = 90/10, flow rate = 1.0 mL/min, I = 254 nm, T = 25 °C) *t<sub>R</sub>* = 6.81 min (major), *t<sub>R</sub>* = 7.65 min (minor).

**IR** (cm<sup>-1</sup>): 3054, 1728, 1280, 1147, 1049, 741.

**[α]<sub>D</sub><sup>25</sup>** = - 1.05 (c = 0.71, CHCl<sub>3</sub>)

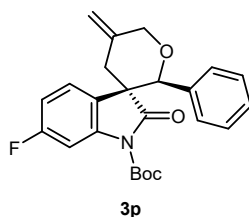

***tert*-butyl(2'*S*,3*S*)-6-fluoro-5'-methylene-2-oxo-2'-phenyl-5',6'-dihydro-**

**2'H,4'H-spiro[indoline-3,3'-pyran]-1-carboxylate (3p)**

**3p** (37.5 mg, 0.092 mmol) was obtained in 92% yield as a white solid. >20:1 *dr*, 84% *ee*, purified by silica gel column chromatography (PE/EA = 20/1).

**Mp** 116.3 - 117.5°C.

**<sup>1</sup>H NMR** (400 MHz, CDCl<sub>3</sub>) δ 7.42 (ddd, *J* = 11.0, 8.6, 3.6 Hz, 2H), 7.09 – 7.04 (m, 1H), 7.02 (t, *J* = 7.4 Hz, 2H), 6.93 – 6.85 (m, 3H), 5.21 (s, 1H), 4.98 – 4.90 (m, 2H), 4.64 (d, *J* = 12.6 Hz, 1H), 4.44 (d, *J* = 12.6 Hz, 1H), 3.24 (d, *J* = 13.8 Hz, 1H), 2.44 (d, *J* = 13.8 Hz, 1H), 1.54 (s, 9H).

**<sup>13</sup>C NMR** (100 MHz, CDCl<sub>3</sub>) δ 175.1, 160.4, 158.0, 148.4, 137.6, 136.1, 134.8, 130.0 (d, *J* = 8.86 Hz), 127.9, 127.4, 126.3, 115.2 (d, *J* = 7.96 Hz), 114.4, 114.1 (d, *J* = 106.48 Hz), 114.0, 113.3, 84.2, 83.5, 73.3, 54.9, 39.1, 27.4.

**<sup>19</sup>F NMR** (376 MHz, CDCl<sub>3</sub>) δ -118.26.

**HRMS-ESI** (positive): *M* = C<sub>24</sub>H<sub>24</sub>FNNaO<sub>4</sub>, calculated (*M*+Na) *m/z*: 432.1582, found: 432.1576.

**HPLC** (IC, *n*-hex/2-propanol = 80/20, flow rate = 1.0 mL/min, *l* = 254 nm, *T* = 25 °C) *t<sub>R</sub>* = 4.35 min (major), *t<sub>R</sub>* = 4.96 min (minor).

**IR** (cm<sup>-1</sup>): 3077, 1728, 1242, 1148, 1047, 706.

[α]<sub>D</sub><sup>25</sup> = - 57.21 (*c* = 0.75, CHCl<sub>3</sub>).

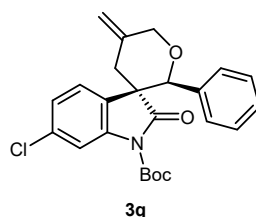

**tert-butyl(2'S,3S)-6-chloro-5'-methylene-2-oxo-2'-phenyl-5',6'-dihydro-2'H,4'H-spiro[indoline-3,3'-pyran]-1-carboxylate (3q)**

**3q** (31.4 mg, 0.074 mmol) was obtained in 74% yield as a yellow solid. >20:1 *dr*, 80% *ee*, purified by silica gel column chromatography (PE/EA = 20/1).

**Mp** 124.8 - 125.7°C.

**<sup>1</sup>H NMR** (400 MHz, CDCl<sub>3</sub>) δ 7.63 (d, *J* = 2.0 Hz, 1H), 7.41 (d, *J* = 8.7 Hz, 1H), 7.16 (dd, *J* = 8.7, 2.0 Hz, 1H), 7.08 – 6.99 (m, 3H), 6.90 (d, *J* = 7.4 Hz, 2H),

5.23 (s, 1H), 4.98 (s, 1H), 4.91 (s, 1H), 4.66 (d,  $J = 12.6$  Hz, 1H), 4.44 (d,  $J = 12.6$  Hz, 1H), 3.24 (d,  $J = 13.9$  Hz, 1H), 2.44 (d,  $J = 13.8$  Hz, 1H), 1.54 (s, 9H).  
 **$^{13}\text{C}$  NMR** (100 MHz,  $\text{CDCl}_3$ )  $\delta$  174.9, 148.3, 137.5, 137.4, 136.0, 130.0, 129.2, 128.1, 128.0, 127.4, 126.3, 125.9, 115.3, 114.1, 84.4, 83.6, 73.4, 54.8, 39.0, 27.9.

**HRMS-ESI** (positive):  $M = \text{C}_{24}\text{H}_{24}\text{ClNNaO}_4$ , calculated ( $M+\text{Na}$ )  $m/z$ : 448.1286, found: 448.1294.

**HPLC** (IC,  $n$ -hex/2-propanol = 80/20, flow rate = 1.0 mL/min,  $\lambda = 254$  nm,  $T = 25$  °C)  $t_R = 4.29$  min (major),  $t_R = 4.82$  min (minor).

**IR** ( $\text{cm}^{-1}$ ): 3059, 1729, 1250, 1149, 1090, 742.

**$[\alpha]_D^{25}$**  = - 14.76 ( $c = 0.39$ ,  $\text{CHCl}_3$ ).

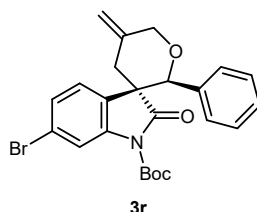

***tert*-butyl(2'*S*,3*S*)-6-bromo-5'-methylene-2-oxo-2'-phenyl-5',6'-dihydro-2'*H*,4'*H*-spiro[indoline-3,3'-pyran]-1-carboxylate (3r)**

Method A: **3r** (44.5mg, 0.094 mmol) was obtained in 94% yield as a white solid.  $>20:1$  *dr*, 80% *ee*, purified by silica gel column chromatography (PE/EA = 15/1).

Method B: 34.9mg, 0.074 mmol, yield 74%,  $>20:1$  *dr*, 80% *ee*.

**Mp** 136.1 - 137.7°C.

**$^1\text{H}$  NMR** (400 MHz,  $\text{CDCl}_3$ )  $\delta$  7.77 (d,  $J = 1.7$  Hz, 1H), 7.33 (dt,  $J = 8.7, 5.2$  Hz, 2H), 7.10 – 7.05 (m, 1H), 7.03 (t,  $J = 7.3$  Hz, 2H), 6.89 (d,  $J = 7.0$  Hz, 2H), 5.22 (s, 1H), 4.98 (s, 1H), 4.91 (s, 1H), 4.66 (d,  $J = 12.6$  Hz, 1H), 4.44 (d,  $J = 12.6$  Hz, 1H), 3.23 (d,  $J = 13.8$  Hz, 1H), 2.44 (d,  $J = 13.9$  Hz, 1H), 1.54 (s, 9H).  
 **$^{13}\text{C}$  NMR** (100 MHz,  $\text{CDCl}_3$ )  $\delta$  174.7, 148.2, 137.9, 137.4, 135.9, 131.0, 130.3, 128.7, 128.0, 127.4, 126.3, 116.8, 115.7, 114.1, 84.4, 83.6, 73.3, 54.7, 39.0, 27.9.

**HRMS-ESI** (positive):  $M = \text{C}_{24}\text{H}_{24}\text{BrNNaO}_4$ , calculated ( $M+\text{Na}$ )  $m/z$ : 492.0781,

found: 492.0773.

**HPLC** (IC, *n*-hex/2-propanol = 80/20, flow rate = 1.0 mL/min,  $\lambda$  = 254 nm, T = 25 °C)  $t_R$  = 4.34 min (major),  $t_R$  = 4.86 min (minor).

**IR** (cm<sup>-1</sup>): 3055, 1732, 1249, 1148, 1090, 747 cm<sup>-1</sup>;

**$[\alpha]^{25}_D$**  = - 0.34 (c = 0.82, CHCl<sub>3</sub>).

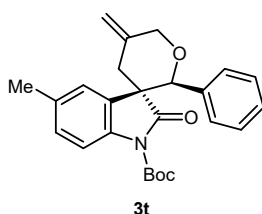

***tert*-butyl(2'*S*,3*S*)-5-methyl-5'-methylene-2-oxo-2'-phenyl-5',6'-dihydro-2'*H*,4'*H*-spiro[indoline-3,3'-pyran]-1-carboxylate(3t)**

**3t** (28.9 mg, 0.071 mmol) was obtained in 71% yield as a yellow liquid. >20:1 *dr*, 80% *ee*, purified by silica gel column chromatography (PE/EA = 20/1).

**<sup>1</sup>H NMR** (400 MHz, CDCl<sub>3</sub>)  $\delta$  7.47 (d, *J* = 0.7 Hz, 1H), 7.36 – 7.31 (m, 1H), 7.09 – 7.03 (m, 1H), 7.03 – 6.97 (m, 3H), 6.88 (d, *J* = 7.2 Hz, 2H), 5.19 (d, *J* = 1.1 Hz, 1H), 4.95 (s, 1H), 4.92 (s, 1H), 4.66 (dd, *J* = 12.6, 1.3 Hz, 1H), 4.46 (d, *J* = 12.6 Hz, 1H), 3.24 (d, *J* = 14.7 Hz, 1H), 2.45 (dd, *J* = 13.8, 1.3 Hz, 1H), 2.37 (s, 3H), 1.54 (s, 9H).

**<sup>13</sup>C NMR** (100 MHz, CDCl<sub>3</sub>)  $\delta$  175.7, 148.5, 138.2, 136.5, 136.3, 133.2, 128.5, 128.3, 128.2, 127.8, 127.3, 126.5, 126.5, 113.9, 113.4, 83.9, 83.8, 73.4, 54.72, 39.3, 28.0, 21.2.

**HRMS-ESI** (positive): M = C<sub>25</sub>H<sub>27</sub>NNaO<sub>4</sub>, calculated (M+Na) *m/z*: 428.1864, found: 428.1866.

**HPLC** (IC, *n*-hex/2-propanol = 90/10, flow rate = 1.0 mL/min,  $\lambda$  = 254 nm, T = 25 °C)  $t_R$  = 5.34 min (major),  $t_R$  = 6.32 min (minor).

**IR** (cm<sup>-1</sup>): 2979, 1731, 1277, 1153, 908, 732.

**$[\alpha]^{25}_D$**  = - 59.12 (c = 0.43, CHCl<sub>3</sub>).

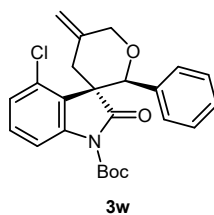

***tert*-butyl(2'*S*,3*S*)-4-chloro-5'-methylene-2-oxo-2'-phenyl-5',6'-dihydro-2'*H*,4'*H*-spiro[indoline-3,3'-pyran]-1-carboxylate (3w)**

**3w** (25.6 mg, 0.062 mmol) was obtained in 62% yield as a white solid. >20:1 *dr*, 11% *ee*, purified by silica gel column chromatography (PE/EA = 20/1).

**Mp** 142.8 – 143.7 °C.

**<sup>1</sup>H NMR** (400 MHz, CDCl<sub>3</sub>) δ 7.50 (dd, *J* = 6.7, 2.4 Hz, 1H), 7.15 – 7.06 (m, 3H), 7.03 (d, *J* = 4.4 Hz, 4H), 5.43 (s, 1H), 5.18 (s, 1H), 5.00 (s, 1H), 4.69 (dd, *J* = 12.8, 1.3 Hz, 1H), 4.41 (d, *J* = 12.7 Hz, 1H), 3.80 (dd, *J* = 14.8, 1.1 Hz, 1H), 2.56 (dd, *J* = 14.7, 1.2 Hz, 1H), 1.52 (s, 9H).

**<sup>13</sup>C NMR** (100 MHz, CDCl<sub>3</sub>) δ 172.6, 148.6, 141.3, 138.0, 136.2, 129.8, 129.8, 128.1, 127.4, 126.4, 125.5, 124.9, 113.2, 112.3, 84.2, 79.4, 72.6, 54.7, 34.6, 23.0.

**HRMS-ESI** (positive): *M* = C<sub>24</sub>H<sub>24</sub>ClNNaO<sub>4</sub>, calculated (*M*+Na) *m/z*: 448.1298, found: 448.1297.

**HPLC** (IC, *n*-hex/2-propanol = 80/20, flow rate = 1.0 mL/min, I = 254 nm, T = 25 °C) *t<sub>R</sub>* = 15.51 min (minor), *t<sub>R</sub>* = 35.44 min (major).

IR (cm<sup>-1</sup>): 2983, 1733, 1304, 1129, 1071, 734.

[α]<sub>D</sub><sup>25</sup> = - 1.67 (*c* = 0.06, CHCl<sub>3</sub>).

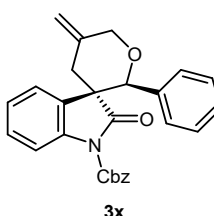

**benzyl(2'*S*,3*S*)-5'-methylene-2-oxo-2'-phenyl-5',6'-dihydro-2'*H*,4'*H*-spiro[indoline-3,3'-pyran]-1-carboxylate (3x)**

**3x** (26.7 mg, 0.063 mmol) was obtained in 63% yield as a yellow solid. >20:1

*dr*, 86% *ee*, purified by silica gel column chromatography (PE/EA = 10/1).

**Mp** 113.5 - 114.2°C.

**<sup>1</sup>H NMR** (400 MHz, CDCl<sub>3</sub>) δ 7.68 (dd, *J* = 7.4, 1.1 Hz, 1H), 7.55 (d, *J* = 7.8 Hz, 1H), 7.46 – 7.35 (m, 5H), 7.18 (dtd, *J* = 22.9, 7.6, 1.3 Hz, 2H), 7.05 – 6.99 (m, 1H), 6.89 (dt, *J* = 8.5, 4.7 Hz, 4H), 5.35 (q, *J* = 12.5 Hz, 2H), 5.20 (s, 1H), 4.95 (d, *J* = 3.8 Hz, 2H), 4.66 (dd, *J* = 12.6, 1.3 Hz, 1H), 4.47 (d, *J* = 12.6 Hz, 1H), 3.26 (dd, *J* = 13.8, 0.9 Hz, 1H), 2.48 (dd, *J* = 13.8, 1.4 Hz, 1H).

**<sup>13</sup>C NMR** (100 MHz, CDCl<sub>3</sub>) δ 175.3, 150.1, 138.4, 137.9, 136.2, 135.0, 128.6, 128.4, 128.3, 127.9, 127.9, 127.4, 126.4, 126.0, 124.0, 114.3, 113.6, 83.7, 73.4, 68.3, 54.9, 39.5.

**HRMS-ESI** (positive): *M* = C<sub>24</sub>H<sub>24</sub>ClNO<sub>4</sub>, calculated (*M*+*H*) *m/z*: 426.1700, found: 426.1702.

**HPLC** (IC, *n*-hex/2-propanol = 80/20, flow rate = 1.0 mL/min, *l* = 254 nm, *T* = 25 °C) *t<sub>R</sub>* = 7.03 min (major), *t<sub>R</sub>* = 11.75 min (minor).

**IR** (cm<sup>-1</sup>): 3030, 1782, 1232, 1152, 767, 693.

**[α]<sub>D</sub><sup>25</sup>** = - 67.11 (*c* = 0.43, CHCl<sub>3</sub>).

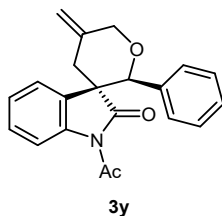

**(2'*S*,3'*S*)-1-acetyl-5'-methylene-2'-phenyl-5',6'-dihydro-2'*H*,4'*H*-spiro[indoline-3,3'-pyran]-2-one (3y)**

**3y** (22.0 mg, 0.066 mmol) was obtained in 66% yield as a white solid. >20:1 *dr*, 87% *ee*, purified by silica gel column chromatography (PE/EA = 20/1).

**Mp** 65.1 - 66.2°C.

**<sup>1</sup>H NMR** (400 MHz, CDCl<sub>3</sub>) δ 7.89 (dd, *J* = 8.0, 0.7 Hz, 1H), 7.70 (dd, *J* = 7.4, 1.2 Hz, 1H), 7.26 – 7.15 (m, 2H), 7.10 – 7.04 (m, 1H), 6.99 (dd, *J* = 10.2, 4.6 Hz, 2H), 6.85 (d, *J* = 7.2 Hz, 2H), 5.21 (d, *J* = 1.2 Hz, 1H), 4.96 (s, 1H), 4.93 (s, 1H), 4.67 (dd, *J* = 12.7, 1.4 Hz, 1H), 4.48 (d, *J* = 12.6 Hz, 1H), 3.23 (dd, *J* = 13.7, 1.1 Hz, 1H), 2.53 (d, *J* = 9.8 Hz, 3H), 2.48 (dd, *J* = 13.8, 1.3 Hz, 1H).



**<sup>13</sup>C NMR** (100 MHz, CDCl<sub>3</sub>) δ 177.8, 170.2, 139.2, 137.7, 136.1, 128.3, 128.2, 127.4, 126.4, 125.8, 124.4, 115.6, 113.8, 83.9, 73.5, 54.8, 39.5, 26.5.

**HRMS-ESI** (positive): M = C<sub>21</sub>H<sub>20</sub>NO<sub>3</sub>, calculated (M+H) m/z: 334.1438, found: 334.1444.

**HPLC** (IC, *n*-hex/2-propanol = 80/20, flow rate = 1.0 mL/min, I = 254 nm, T = 25 °C) t<sub>R</sub> = 5.54 min (major), t<sub>R</sub> = 5.95 min (minor).

**IR** (cm<sup>-1</sup>): 3075, 1745, 1270, 1195, 1097, 722.

**[α]<sub>D</sub><sup>25</sup>** = - 32.42 (c = 0.33, CHCl<sub>3</sub>).

## 5. Scaled-up Synthesis of the Product **3a**

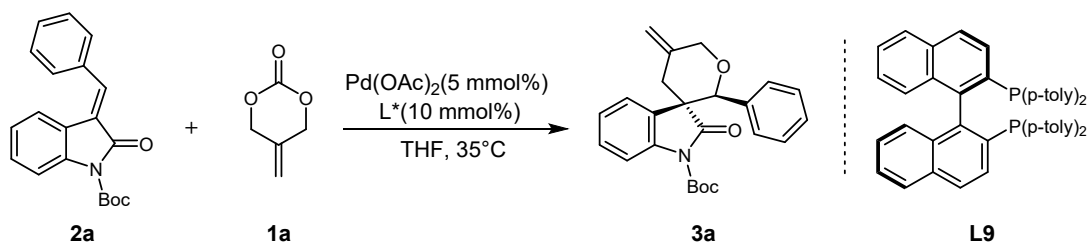

To an oven-dried Schlenk tube was added  $\text{Pd}(\text{OAc})_2$  (0.2 mmol), Chiral ligand **L9** (0.4 mmol) followed by the addition of THF (20 mL). The reaction mixture was allowed to stir for 30 mins at room temperature ( $25^\circ\text{C}$ ), to the reaction mixture was then added methyleneindolinones **2a** (40 mmol), 2-Methylidenetrimethylene **1a** (60 mmol). The reaction mixture was allowed to stir at  $35^\circ\text{C}$  for 24 h and then directly purified by silica gel chromatography (PE/EA = 20/1 to 10/1) to provide the desired product **3a** in 89% yield (1.39g, 34.8 mmol) with 87% ee and  $> 20:1$  dr.

## 6. Transformations of the Product **3a**<sup>[7, 8]</sup>

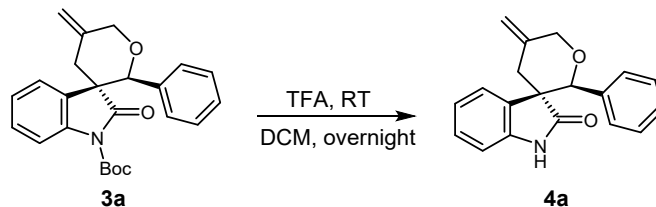

A sealed tube was charged with chiral **3a** (0.2 mmol, 78.4 mg), trifluoroacetic acid (TFA, 1 mL) and dichloromethane (3 mL). The reaction mixture was stirred at ambient temperature until the reaction was judged to be completed by TLC analysis. 50 mL H<sub>2</sub>O was added, and the mixture was extracted by DCM (40 mL × 3). The combined organic layers were dried over anhydrous Na<sub>2</sub>SO<sub>4</sub>, filtered and concentrated. The crude product was purified by chromatography on silica gel (PE/EA = 4/1) to afford the desired product **4a**.

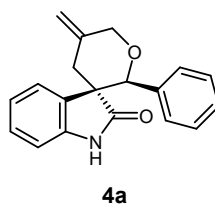

**(2'S,3S)-5'-methylene-2'-phenyl-5',6'-dihydro-2'H,4'H-spiro[indoline-3,3'-pyran]-2-one (4a)**

**4a** (55.7 mg, 0.192 mmol) was obtained in 96% yield as a white solid. >20:1 *dr*, 86% *ee*, purified by silica gel column chromatography (PE/EA = 4/1).

**Mp** 146.5 - 147.8°C.

**<sup>1</sup>H NMR** (400 MHz, CDCl<sub>3</sub>) δ 8.24 (s, 1H), 7.64 (d, *J* = 7.4 Hz, 1H), 7.13 (t, *J* = 7.4 Hz, 1H), 7.09 – 7.01 (m, 2H), 6.97 (td, *J* = 6.1, 3.9 Hz, 4H), 6.60 (d, *J* = 7.7 Hz, 1H), 5.18 (s, 1H), 4.95 (s, 1H), 4.92 (s, 1H), 4.64 (d, *J* = 12.5 Hz, 1H), 4.45 (d, *J* = 12.5 Hz, 1H), 3.18 (d, *J* = 13.6 Hz, 1H), 2.40 (d, *J* = 13.5 Hz, 1H).

**<sup>13</sup>C NMR** (100 MHz, CDCl<sub>3</sub>) δ 178.8, 139.9, 138.4, 136.7, 129.8, 127.9, 127.7, 127.3, 126.8, 126.5, 121.8, 113.3, 109.2, 83.0, 82.9, 73.3, 55.1, 39.3.

**HRMS-ESI** (positive): *M* = C<sub>19</sub>H<sub>18</sub>NO<sub>2</sub>, calculated (*M*+*H*) *m/z*: 292.1332, found:

292.1327.

**HPLC** (AD-H, *n*-hex/2-propanol = 95/5, flow rate = 1.0 mL/min,  $\lambda$  = 254 nm,  $T$  = 25 °C)  $t_R$  = 14.49 min (major),  $t_R$  = 15.49 min (minor).

**IR** ( $\text{cm}^{-1}$ ): 3181, 1704, 1469, 1094, 753, 681.

$[\alpha]_D^{25} = -3.33$  ( $c = 1.12$ ,  $\text{CHCl}_3$ ).

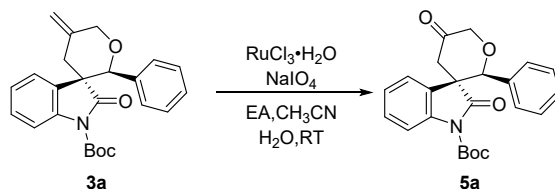

A solution of  $\text{NaIO}_4$  (85 mg, 0.4 mmol) in water (0.6 mL) was added to a solution of  $\text{RuCl}_3 \cdot \text{H}_2\text{O}$  (3.1 mg, 15 mol%) in MeCN (0.8 mL). This mixture was stirred 2 minutes and then a solution of the **3a** (0.1 mmol) in EA (0.8 mL) was added. The mixture was stirred for 10 minutes until TLC indicates complete consumption of the starting material.  $\text{MgSO}_4$  was added and the resulting heterogeneous mixture was washed with EA, and finally evaporated under reduced pressure. Purified by flash chromatography on silica gel with PE/EA (4/1) as the solvent give a white solid **5a**.

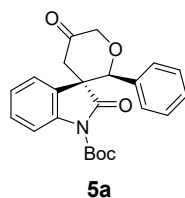

***tert*-butyl(2'*S*,3*S*)-2,5'-dioxo-2'-phenyl-5',6'-dihydro-2'*H*,4'*H*-spiro[indoline-3,3'-pyran]-1-carboxylate (**5a**)**

**5a** (18,8 mg, 0.096 mmol) was obtained in 48% yield as a colourless oil, >20:1 *dr*, 85% *ee*, purified by silica gel column chromatography (PE/EA = 5/1).

**$^1\text{H NMR}$**  (400 MHz,  $\text{CDCl}_3$ )  $\delta$  7.46 (d,  $J = 8.1$  Hz, 1H), 7.37 (d,  $J = 7.3$  Hz, 1H), 7.24 (d,  $J = 7.8$  Hz, 1H), 7.20 – 7.09 (m, 2H), 7.04 (t,  $J = 7.6$  Hz, 2H), 6.89 (d,  $J = 7.5$  Hz, 2H), 5.20 (s, 1H), 4.57 (d,  $J = 16.3$  Hz, 1H), 4.46 (d,  $J = 16.2$  Hz, 1H), 3.42 (d,  $J = 16.7$  Hz, 1H), 2.66 (d,  $J = 16.6$  Hz, 1H), 1.53 (s, 9H).

**$^{13}\text{C NMR}$**  (100 MHz,  $\text{CDCl}_3$ )  $\delta$  203.9, 174.0, 148.1, 139.0, 134.5, 129.1, 128.4, 127.5, 127.0, 126.4, 124.8, 124.4, 114.6, 84.5, 83.1, 75.5, 56.3, 44.6, 27.9.

**HRMS-ESI** (positive):  $M = C_{23}H_{23}NNaO_5$ , calculated ( $M+Na$ )  $m/z$ : 416.1459, found: 416.1468.

**HPLC** (IC, *n*-hex/2-propanol = 90/10, flow rate = 1.0 mL/min,  $\lambda = 254$  nm,  $T = 25$  °C)  $t_R = 13.32$  min (major),  $t_R = 23.26$  min (minor).

**IR** ( $cm^{-1}$ ): 2979, 1733, 1252, 1152, 751, 715.

$[\alpha]_D^{25} = -55.13$  ( $c = 0.23$ ,  $CHCl_3$ ).

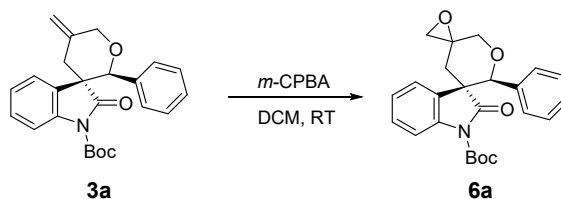

To a solution of **3a** (0.10 mmol, 1.0 equiv.) in dichloromethane (2 mL) was added the dichloromethane solution of *m*-CPBA (0.30 mmol, 0.30 M, 1.0 mL) dropwise at 0 °C under nitrogen. The reaction mixture was sealed under nitrogen and allowed to warm to room temperature and stir for 24 hours. The reaction was then quenched with saturated  $NaHCO_3$  solution and extracted with dichloromethane. The combined organic phase was collected and dried with  $Na_2SO_4$ . After filtration and evaporation, the residue was purified by silica gel chromatography (PE/EA = 5/1) to afford a white solid.

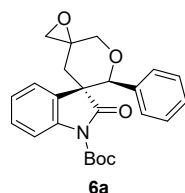

**tert-butyl(2'S,3S)-2-oxo-2'-phenyl-2'H,4'H,6'H-dispiro[indoline-3,3'-pyran-5',2''-oxirane]-1-carboxylate (6a)**

**6a** (18.5 mg, 0.138 mmol) was obtained in 69% yield as a white solid. 2:1 *dr*, 86% *ee*, purified by silica gel column chromatography (PE/EA = 5/1).

**Mp** 123.7 - 124.8 °C.

**$^1H$  NMR** (400 MHz,  $CDCl_3$ )  $\delta$  7.72 (dd,  $J = 7.3, 1.0$  Hz, 1H), 7.50 (d,  $J = 7.8$  Hz, 1H), 7.25 – 7.14 (m, 2H), 7.10 – 7.04 (m, 1H), 7.01 (t,  $J = 7.4$  Hz, 2H), 6.93 (d,  $J = 7.3$  Hz, 2H), 4.93 (s, 1H), 4.23 (dd,  $J = 11.7, 1.8$  Hz, 1H), 3.82 (dd,

$J = 11.7, 1.8 \text{ Hz, 1H}$ ), 3.10 (d,  $J = 4.9 \text{ Hz, 1H}$ ), 3.06 (d,  $J = 13.3 \text{ Hz, 1H}$ ), 2.80 (dd,  $J = 4.9, 1.8 \text{ Hz, 1H}$ ), 1.61 – 1.57 (m, 1H), 1.56 (d,  $J = 3.9 \text{ Hz, 9H}$ ).

**$^1\text{H NMR}$**  (400 MHz,  $\text{CDCl}_3$ )  $\delta$  8.15 – 8.07 (m, 1H), 7.43 – 7.37 (m, 1H), 7.24 – 7.15 (m, 2H), 7.07 (t,  $J = 7.2 \text{ Hz, 1H}$ ), 7.01 (t,  $J = 7.4 \text{ Hz, 2H}$ ), 6.93 (d,  $J = 7.3 \text{ Hz, 2H}$ ), 4.87 (s, 1H), 4.42 (d,  $J = 12.8 \text{ Hz, 1H}$ ), 3.85 (dd,  $J = 12.8, 2.3 \text{ Hz, 1H}$ ), 3.18 (d,  $J = 14.5 \text{ Hz, 1H}$ ), 2.81 (d,  $J = 4.1 \text{ Hz, 1H}$ ), 2.74 (d,  $J = 4.1 \text{ Hz, 1H}$ ), 1.55 (s, 9H).

**$^{13}\text{C NMR}$**  (100 MHz,  $\text{CDCl}_3$ )  $\delta$  174.5, 148.4, 139.0, 135.5, 128.5, 128.0, 127.7, 127.4, 126.4, 125.4, 123.9, 114.6, 84.4, 84.0, 72.7, 56.8, 55.8, 52.5, 37.7, 27.9.

**HRMS-ESI** (positive):  $M = \text{C}_{24}\text{H}_{25}\text{NNaO}_5$ , calculated ( $M+\text{Na}$ )  $m/z$ : 430.1625, found: 430.1619.

**HPLC** (IC, *n*-hex/2-propanol = 90/10, flow rate = 1.0 mL/min,  $\lambda = 254 \text{ nm}$ ,  $T = 25 \text{ }^\circ\text{C}$ )  $t_R = 9.39 \text{ min}$  (major),  $t_R = 13.97 \text{ min}$  (minor).

**IR** ( $\text{cm}^{-1}$ ): 2924, 1732, 1299, 1153, 1118, 714.

**$[\alpha]_D^{25}$**  = - 60.56 ( $c = 0.23, \text{CHCl}_3$ ).

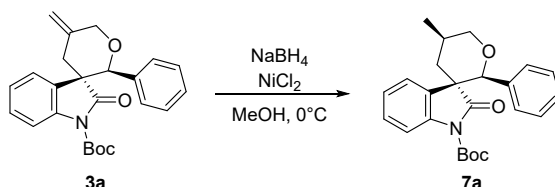

In a reaction tube with a magnetic stirring bar, the solution of **3a** (0.1 mmol, 1.0 equiv.) and  $\text{NiCl}_2$  (0.1 mmol, 1.0 equiv.) in MeOH (4.0 mL) was obtained, and then,  $\text{NaBH}_4$  (1.0 mmol, 10 equiv.) was slowly added at  $0^\circ\text{C}$ . After stirring for 2 h at  $0^\circ\text{C}$ , the reaction was quenched by adding  $\text{NH}_4\text{Cl}$  (aq). The mixture was extracted with DCM (5 mL  $\times$  3), and the combined organic layer was dried over  $\text{Na}_2\text{SO}_4$  and concentrated. The residue was purified using flash column chromatography on silica gel (PE/EA = 5/1) to afford product **7a**.

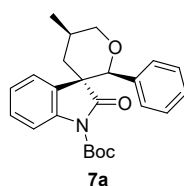

***tert*-butyl(2'*S*,3*S*,5'*R*)-5'-methyl-2-oxo-2'-phenyl-5',6'-dihydro-2'*H*,4'*H*-spiro[indoline-3,3'-pyran]-1-carboxylate (7a)**

**7a** (23.9 mg, 0.123 mmol) was obtained in 61% yield as a colourless oil, >20:1 *dr*, 86% *ee*, purified by silica gel column chromatography (PE/EA = 5/1).

**<sup>1</sup>H NMR** (400 MHz, CDCl<sub>3</sub>) δ 7.57 – 7.52 (m, 1H), 7.48 – 7.42 (m, 1H), 7.11 – 7.03 (m, 2H), 7.01 – 6.96 (m, 5H), 5.09 (s, 1H), 4.25 (dd, *J* = 10.5, 5.9 Hz, 1H), 3.88 (dd, *J* = 10.6, 7.4 Hz, 1H), 2.62 (dh, *J* = 13.9, 7.0 Hz, 1H), 2.44 (dd, *J* = 13.9, 5.1 Hz, 1H), 1.77 (dd, *J* = 14.0, 8.9 Hz, 1H), 1.61 (s, 9H), 1.14 (d, *J* = 6.9 Hz, 3H).

**<sup>13</sup>C NMR** (100 MHz, CDCl<sub>3</sub>) δ 178.1, 148.8, 138.8, 137.4, 130.2, 127.7, 127.3, 127.3, 125.8, 125.5, 123.8, 114.2, 84.1, 80.7, 73.7, 54.3, 38.5, 28.1, 24.7, 19.1.

**HRMS-ESI** (positive): *M* = C<sub>24</sub>H<sub>27</sub>NNaO<sub>4</sub>, calculated (*M*+Na) *m/z*: 416.1832, found: 416.1829.

**HPLC** (IC, *n*-hex/2-propanol = 95/5, flow rate = 1.0 mL/min, λ = 254 nm, T = 25 °C) *t<sub>R</sub>* = 6.02 min (major), *t<sub>R</sub>* = 6.69 min (minor).

**IR** (cm<sup>-1</sup>): 2928, 1733, 1287, 1152, 1065, 752.

**[α]<sub>D</sub><sup>25</sup>** = - 56.34 (*c* = 0.42, CHCl<sub>3</sub>).

## 7. Isomerization of methyleneindodonone

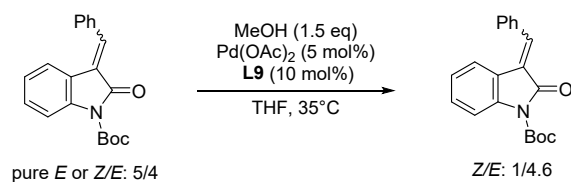

To an oven-dried Schlenk tube was added Pd(OAc)<sub>2</sub> (0.005 mmol), Chiral ligand **L9** (0.01 mmol) followed by the addition of THF (0.5 mL). The reaction mixture was allowed to stir for 30 mins at room temperature (25 °C), to the reaction mixture was then added methyleneindolinone ( pure *E* or *Z/E* = 5/4, 0.1 mmol), MeOH (0.15 mmol). The reaction mixture was allowed to stir at 35 °C for 24 h and then directly purified by silica gel chromatography (PE/EA = 20/1 to 10/1) to provide the product methyleneindolinone (*Z/E*=1/4.6).



## 8. Crystal data for enantiopure products 3a

**Preparations:** Compound **3a** (20.0 mg) was dissolved in n-Hexane / isopropanol =1 (10.0 mL) in a vial. The vial was properly sealed with parafilm and kept at 25 °C to allow the slow evaporation of the solvent until a single crystal was obtained. The crystals were subjected for single crystal XRD to determine the absolute configuration of **3a**.

**Methods:** The data set was collected by a Bruker D8 VENTURE with MetalJet source at 173 K equipped with micro-focus Ga radiation source ( $K\alpha = 1.34138 \text{ \AA}$ ). Applied with face-indexed numerical absorption correction, the structure solution and refinement were processed by SHELXTL program package.

**Date of 3a:** CCDC 2302972 contains the supplementary crystallographic data, and can be obtained via [www.ccdc.cam.ac.uk/conts/retrieving.html](http://www.ccdc.cam.ac.uk/conts/retrieving.html).

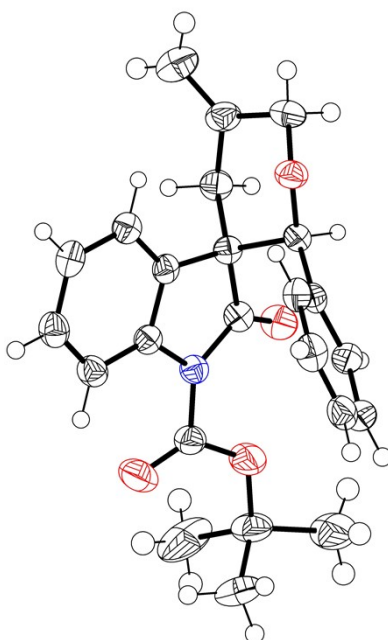

**Figure S3.** Single crystal structure 3a (ellipsoid contour probability 50%).

Table 1. Crystal data and structure refinement for **3a**.

|                                   |                                                                                             |
|-----------------------------------|---------------------------------------------------------------------------------------------|
| Identification code               | <b>3a</b>                                                                                   |
| Empirical formula                 | C <sub>24</sub> H <sub>25</sub> NO <sub>4</sub>                                             |
| Formula weight                    | 391.45                                                                                      |
| Temperature                       | 173(2) K                                                                                    |
| Wavelength                        | 1.34139 Å                                                                                   |
| Crystal system                    | Monoclinic                                                                                  |
| Space group                       | P2 <sub>1</sub>                                                                             |
| Unit cell dimensions              | a = 8.0358(3) Å a = 90°.<br>b = 10.9125(4) Å b = 90.7150(10)°.<br>c = 12.2549(5) Å c = 90°. |
| Volume                            | 1074.56(7) Å <sup>3</sup>                                                                   |
| Z                                 | 2                                                                                           |
| Density (calculated)              | 1.210 Mg/m <sup>3</sup>                                                                     |
| Absorption coefficient            | 0.422 mm <sup>-1</sup>                                                                      |
| F(000)                            | 416                                                                                         |
| Crystal size                      | 0.210 x 0.180 x 0.140 mm <sup>3</sup>                                                       |
| Theta range for data collection   | 4.788 to 54.927°.                                                                           |
| Index ranges                      | -9 ≤ h ≤ 9, -13 ≤ k ≤ 13, -14 ≤ l ≤ 14                                                      |
| Reflections collected             | 15052                                                                                       |
| Independent reflections           | 4049 [R(int) = 0.0239]                                                                      |
| Completeness to theta = 53.594°   | 99.5 %                                                                                      |
| Absorption correction             | Semi-empirical from equivalents                                                             |
| Max. and min. transmission        | 0.864 and 0.753                                                                             |
| Refinement method                 | Full-matrix least-squares on F <sup>2</sup>                                                 |
| Data / restraints / parameters    | 4049 / 44 / 297                                                                             |
| Goodness-of-fit on F <sup>2</sup> | 1.059                                                                                       |
| Final R indices [I > 2σ(I)]       | R1 = 0.0295, wR2 = 0.0780                                                                   |
| R indices (all data)              | R1 = 0.0305, wR2 = 0.0793                                                                   |
| Absolute structure parameter      | 0.09(5)                                                                                     |
| Extinction coefficient            | 0.0100(14)                                                                                  |
| Largest diff. peak and hole       | 0.321 and -0.186 e.Å <sup>-3</sup>                                                          |

Table 2. Atomic coordinates (x 10<sup>4</sup>) and equivalent isotropic displacement parameters (Å<sup>2</sup> x 10<sup>3</sup>) for **3a**. U(eq) is defined as one third of

the trace of the orthogonalized U<sup>ij</sup> tensor.

|      | x       | y       | z       | U(eq) |
|------|---------|---------|---------|-------|
| N(1) | 7467(2) | 4947(2) | 2412(1) | 30(1) |
| O(1) | 7654(2) | 3126(1) | 3413(1) | 43(1) |
| O(2) | 5305(2) | 5546(1) | 5769(1) | 37(1) |
| O(3) | 7054(2) | 3393(2) | 1264(1) | 55(1) |

|       |          |          |          |        |
|-------|----------|----------|----------|--------|
| O(4)  | 7997(3)  | 5164(2)  | 603(1)   | 75(1)  |
| C(1)  | 7502(2)  | 4226(2)  | 3367(2)  | 32(1)  |
| C(2)  | 5541(2)  | 4811(2)  | 4829(2)  | 31(1)  |
| C(3)  | 7295(2)  | 5078(2)  | 4337(2)  | 30(1)  |
| C(4)  | 8628(2)  | 4803(2)  | 5224(2)  | 36(1)  |
| C(5)  | 8205(3)  | 5403(2)  | 6292(2)  | 41(1)  |
| C(6)  | 6441(3)  | 5196(2)  | 6626(2)  | 45(1)  |
| C(7)  | 7408(2)  | 6327(2)  | 3831(2)  | 29(1)  |
| C(8)  | 7488(2)  | 6215(2)  | 2701(2)  | 30(1)  |
| C(9)  | 7605(2)  | 7225(2)  | 2026(2)  | 36(1)  |
| C(10) | 7648(2)  | 8373(2)  | 2516(2)  | 40(1)  |
| C(11) | 7586(2)  | 8506(2)  | 3641(2)  | 37(1)  |
| C(12) | 7462(2)  | 7477(2)  | 4306(2)  | 33(1)  |
| C(13) | 4126(2)  | 5046(2)  | 4031(2)  | 30(1)  |
| C(14) | 3221(2)  | 6132(2)  | 4051(2)  | 36(1)  |
| C(15) | 1963(3)  | 6340(2)  | 3281(2)  | 44(1)  |
| C(16) | 1612(2)  | 5470(2)  | 2491(2)  | 43(1)  |
| C(17) | 2485(3)  | 4381(2)  | 2479(2)  | 44(1)  |
| C(18) | 3734(3)  | 4164(2)  | 3250(2)  | 37(1)  |
| C(19) | 9266(3)  | 6059(3)  | 6880(2)  | 56(1)  |
| C(20) | 7535(3)  | 4523(2)  | 1334(2)  | 37(1)  |
| C(21) | 7263(3)  | 2684(2)  | 243(2)   | 51(1)  |
| C(22) | 6381(17) | 3221(9)  | -729(11) | 58(2)  |
| C(23) | 9030(20) | 2488(19) | 143(13)  | 104(6) |
| C(24) | 6220(30) | 1507(10) | 507(9)   | 85(3)  |

## 9. Reference

1. M. Rehan, J. Flegel, F. Heitkamp, J. L. Pergomet, F. Otte, C. Strohmann and K. Kumar, Asymmetric Synthesis of 3,3'-Piperidinoyl Spirooxindoles and Discovery of Stereospecific Cycloadducts as Novel Hedgehog Pathway Modulators, *Synthesis.*, 2020, **52**, 3140-3152.
2. G. Wang, X. Liu, T. Huang, Y. Kuang, L. Lin and X. Feng, Asymmetric Catalytic 1,3-Dipolar Cycloaddition Reaction of Nitrile Imines for the Synthesis of Chiral Spiro-Pyrazoline-Oxindoles, *Org. Lett.*, 2013, **15**, 76-79.
3. P. Franceschi, J. Mateos, A. Vega-Peñaloza, L. Dell'Amico, Microfluidic Visible-Light Paternò-Büchi Reaction of Oxindole Enol Ethers, *Eur. J. Org. Chem.*, 2020, **43**, 6718-6722.
4. Q. Tian, X. Chen, W. Liu, Z. Wang, S. Shi and C. Kuang, Regioselective halogenation of 2-substituted-1,2,3-triazoles via sp<sup>2</sup> C–H activation, *Org. Biomol. Chem.*, 2013, **11** 7830–7833.
5. S. Zhang, Y. Liu, Y. Zheng, H. Xie, S. Chen, J. Song and B. Shu, Rhodium(III)-Catalyzed Regioselective C, *Adv. Synth. Catal.*, 2022, **364**, 64-70.
6. A. Archambeau, J. Garrec, A. Scullier, X. Liu and M. Cordier, A Palladium-Catalyzed Oxa-(4+4)-Cycloaddition Strategy Towards Oxazocine Scaffolds, *Synlett*, 2021, **32**, 981-986.
7. J. Wang, L. Zhao, Q. Rong, C. Lv, Y. Lu, X. Pan, L. Zhao and L. Hu, Asymmetric Synthesis of 3,3'-Tetrahydrofuryl Spirooxindoles via Palladium-Catalyzed [3+2] Cycloadditions of Methyleneindolinones with Vinylethylene Carbonates, *Org. Lett.*, 2020, **22**, 5833-5838.
8. B. Mao, H. Liu, Z. Yan, Y. Xu, J. Xu, W. Wang, Y. Wu and H. Guo, Palladium-Catalyzed Asymmetric [4+2] Cycloaddition of 2-Methylidenetrimethylene Carbonate with Alkenes: Access to Chiral Tetrahydropyran-Fused Spirocyclic Scaffolds, *Angew. Chem. Int. Ed.*, 2020, **59**, 11316-11320.
9. P. Dou, S. Yuan, Y. Chen, J. Zhao, Z. Wang, Y. You, Y. Zhang, M. Zhou and W. Yuan, Dearomatization of 3-Nitroindoles Enabled Using Palladium-Catalyzed Decarboxylative [4 + 2] Cycloaddition of 2-Alkylidenetrimethylene Carbonates, *J. Org. Chem.*, 2022, **87**, 6025-6037.

## 10. NMR spectra of representative compounds

$^1\text{H}$  NMR of **2a** (400 MHz,  $\text{CDCl}_3$ )

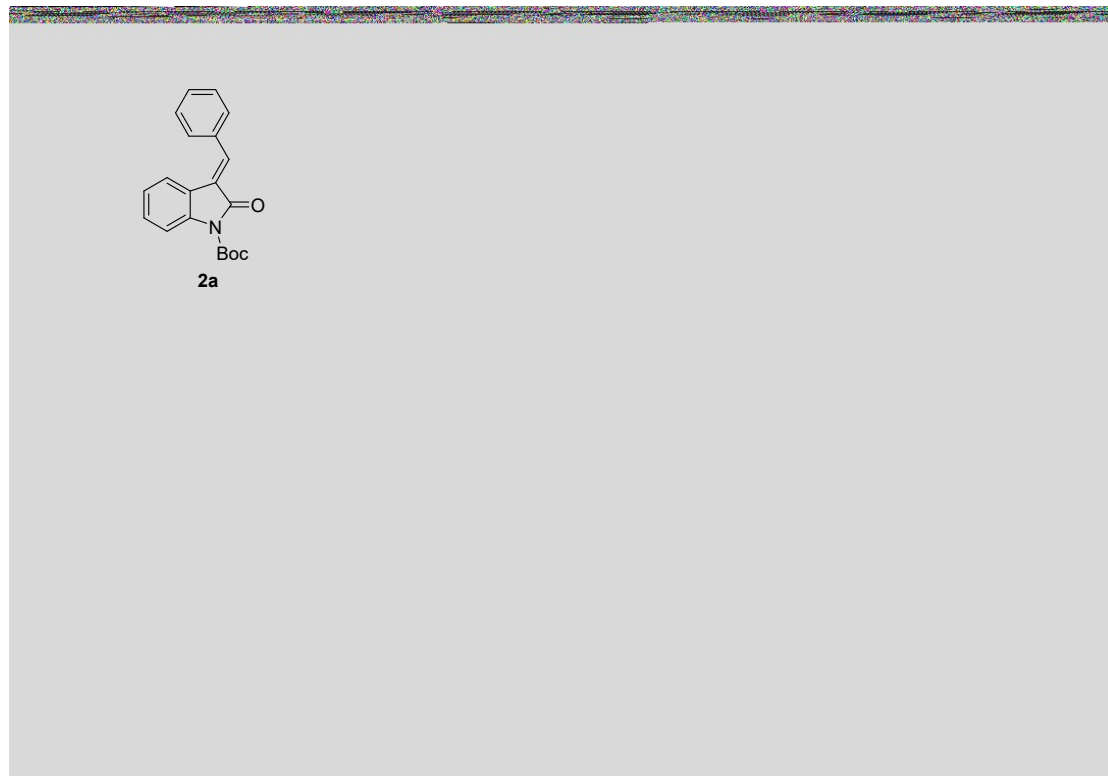

$^1\text{H}$  NMR of **2b** (400 MHz,  $\text{CDCl}_3$ )

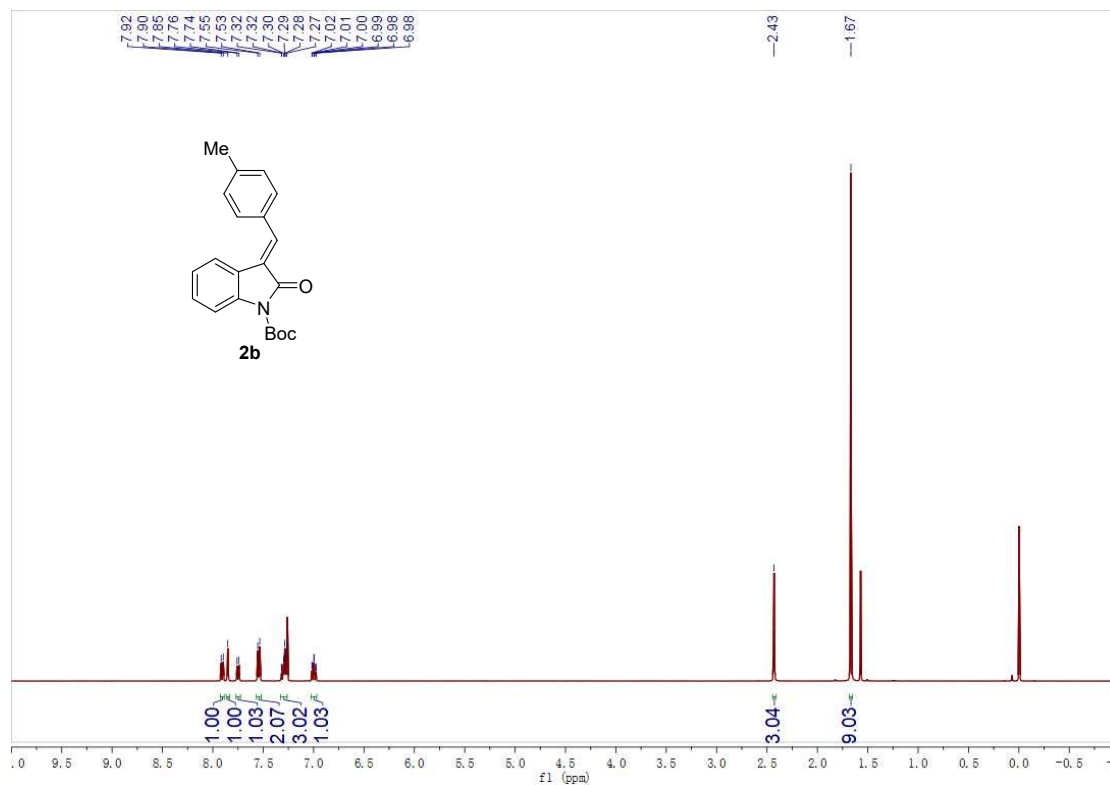

$^{13}\text{C}$   $\{^1\text{H}\}$  NMR of **2b** (100 MHz,  $\text{CDCl}_3$ )

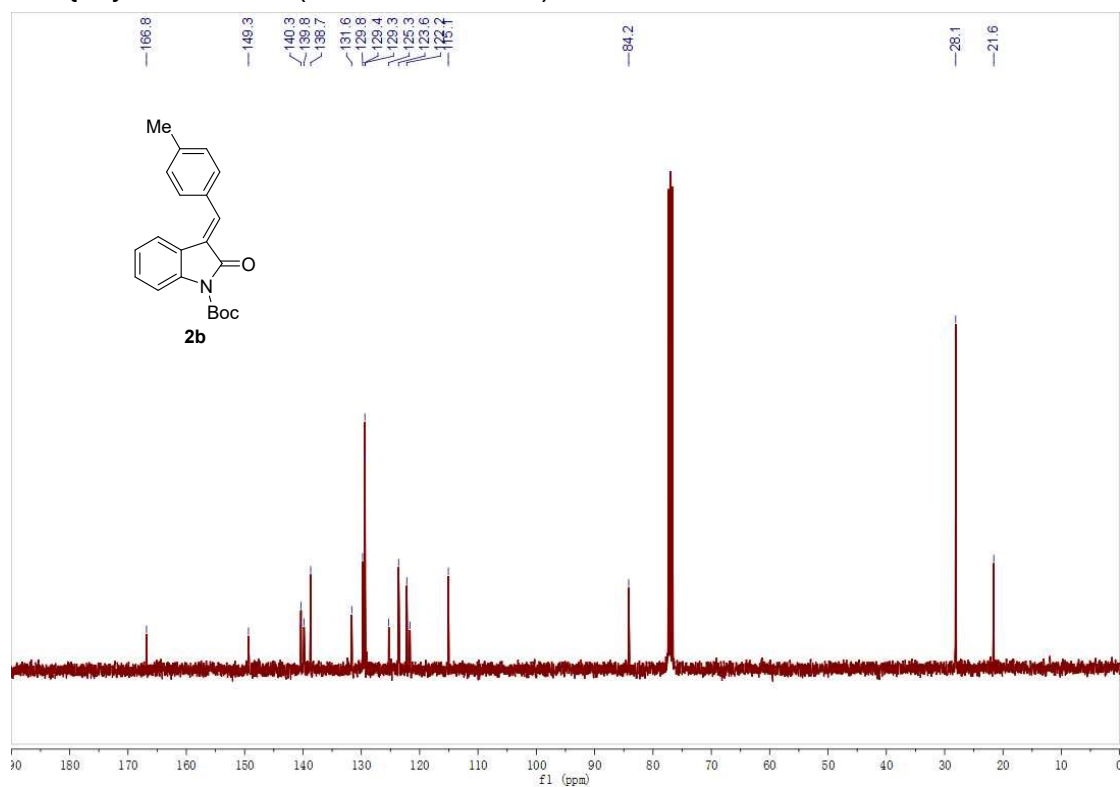

$^1\text{H}$  NMR of **2c** (400 MHz,  $\text{CDCl}_3$ )

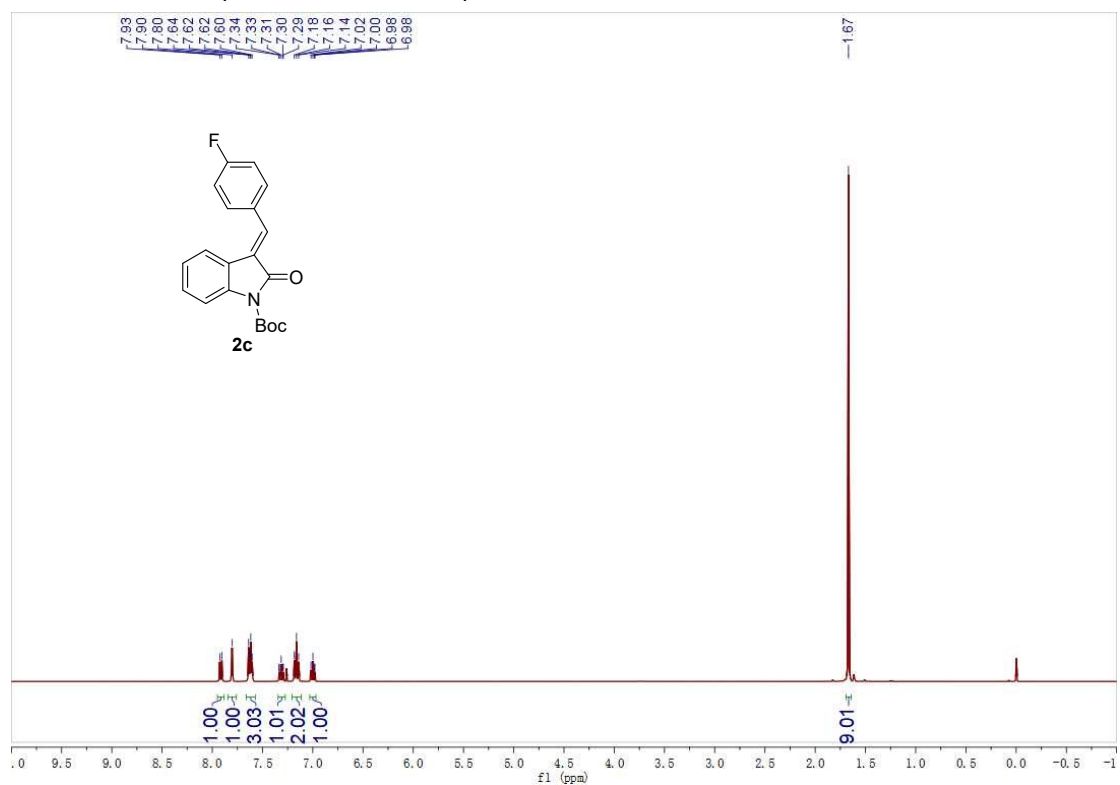

**<sup>1</sup>H NMR of 2d (400 MHz, CDCl<sub>3</sub>)**

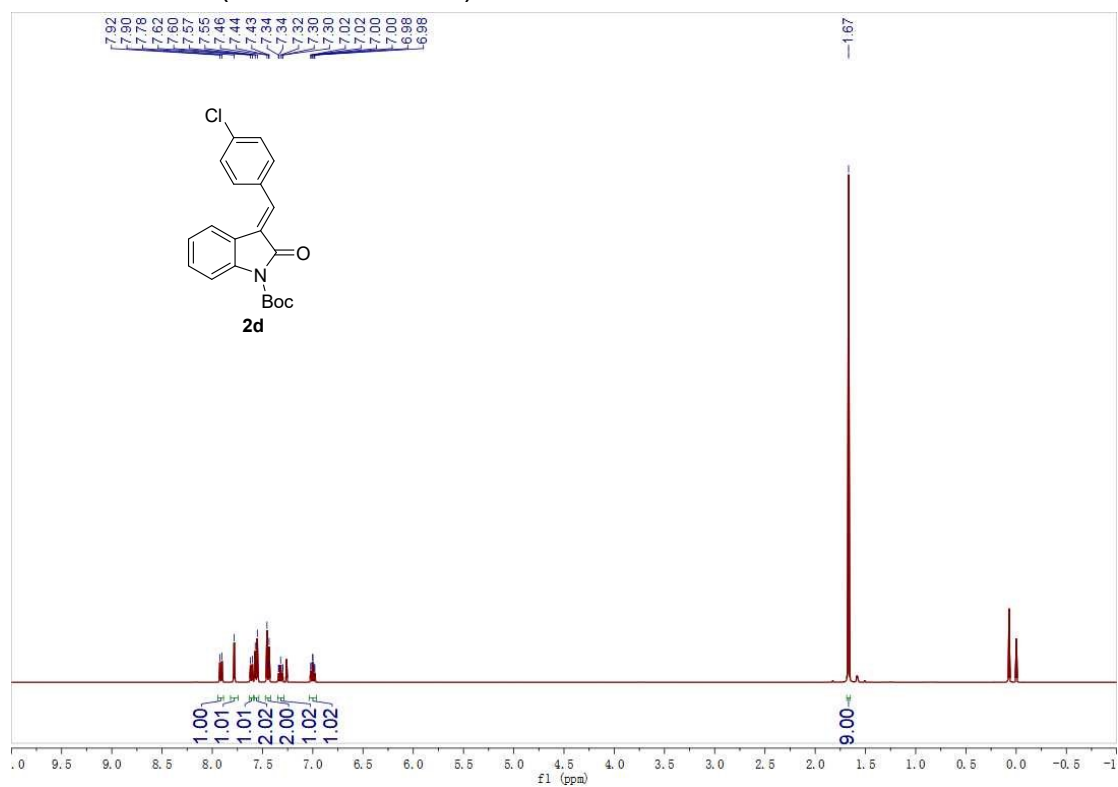

**<sup>1</sup>H NMR of 2e (400 MHz, CDCl<sub>3</sub>)**

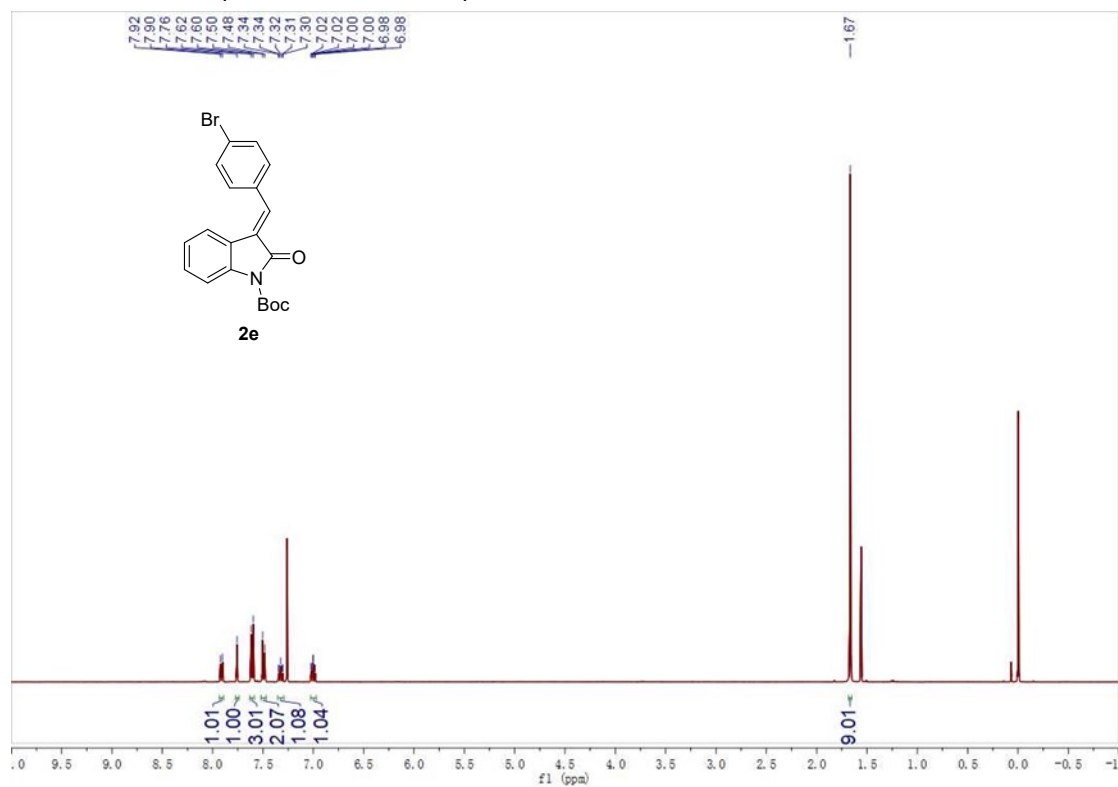

<sup>1</sup>H NMR of **2f** (400 MHz, CDCl<sub>3</sub>)

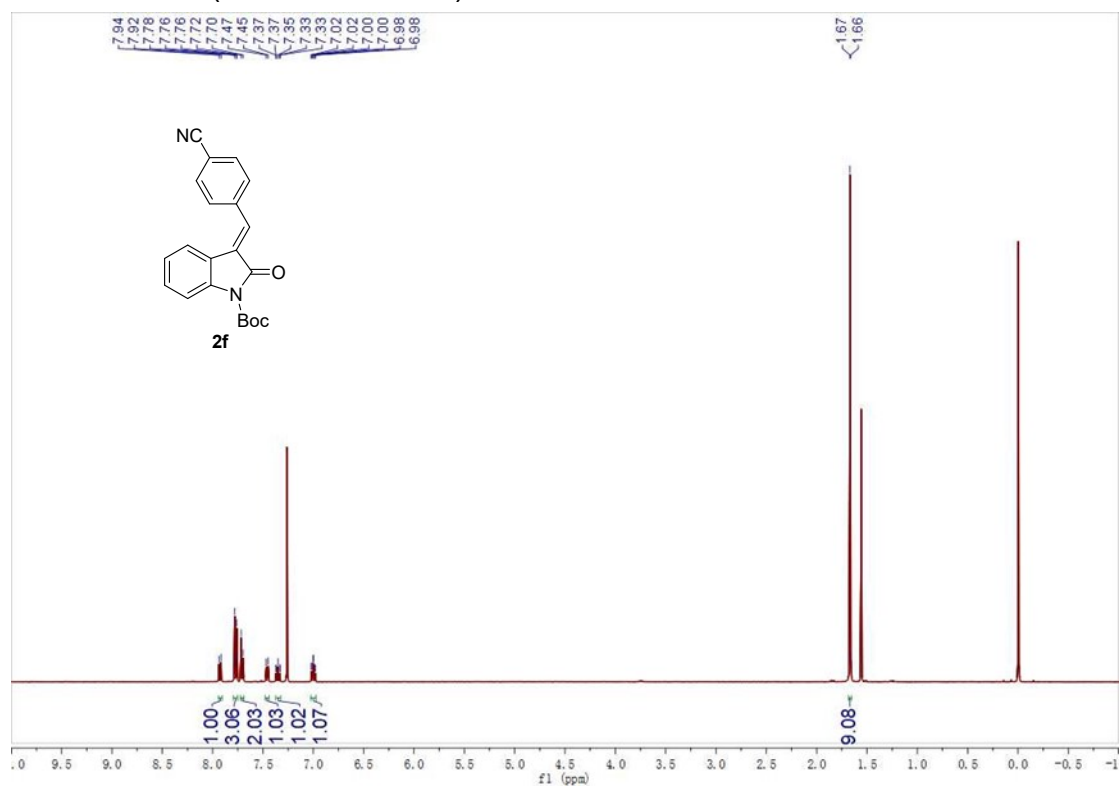

<sup>13</sup>C {<sup>1</sup>H} NMR of **2f** (100 MHz, CDCl<sub>3</sub>)

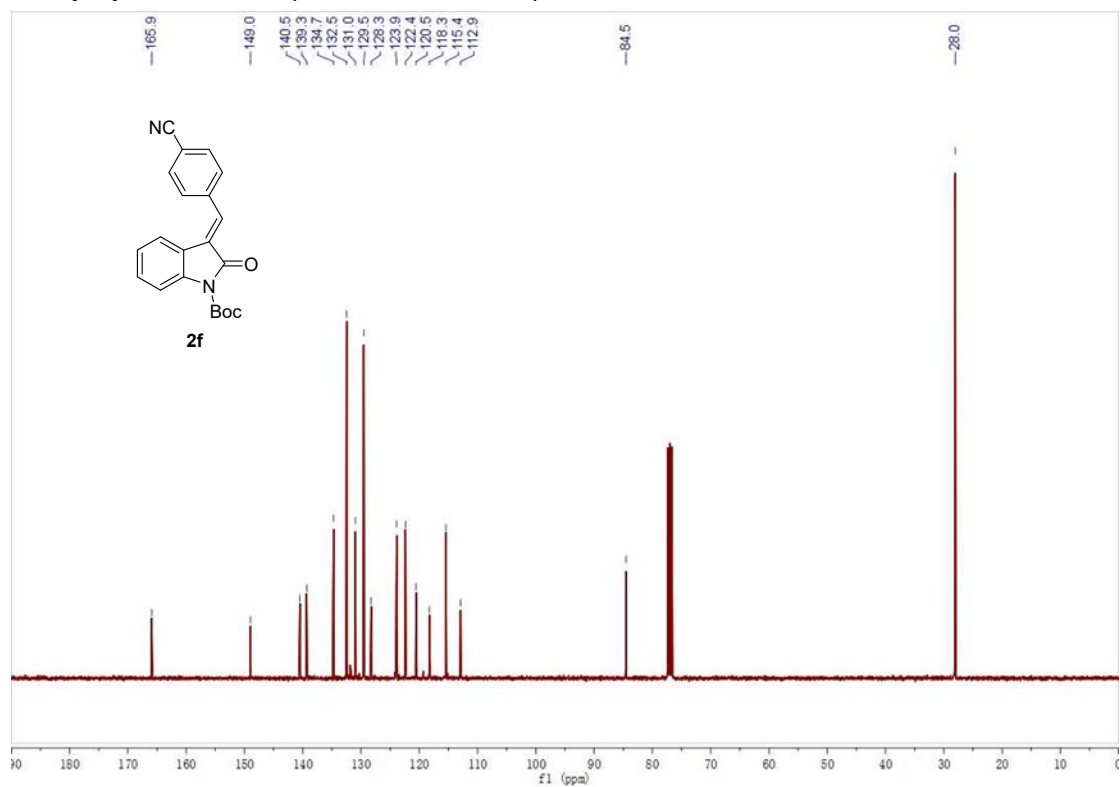



$^1\text{H}$  NMR of **2g** (400 MHz,  $\text{CDCl}_3$ )

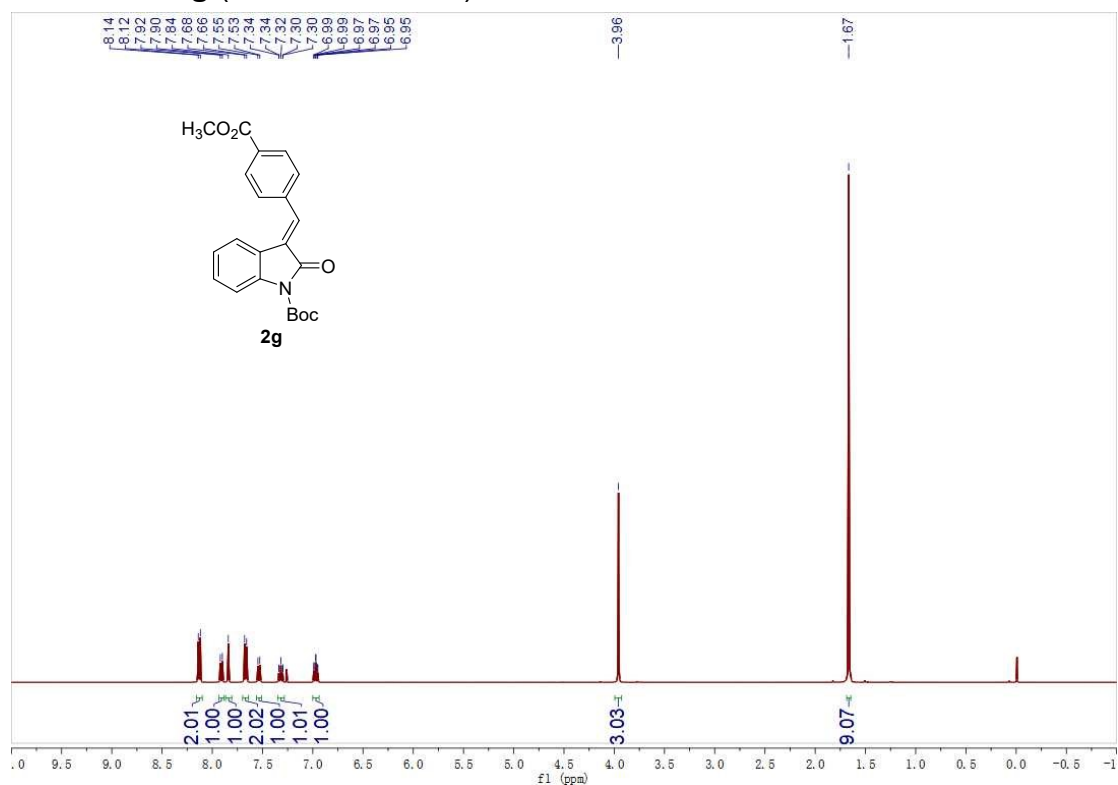

$^{13}\text{C}$   $\{^1\text{H}\}$  NMR of **2g** (100 MHz,  $\text{CDCl}_3$ )

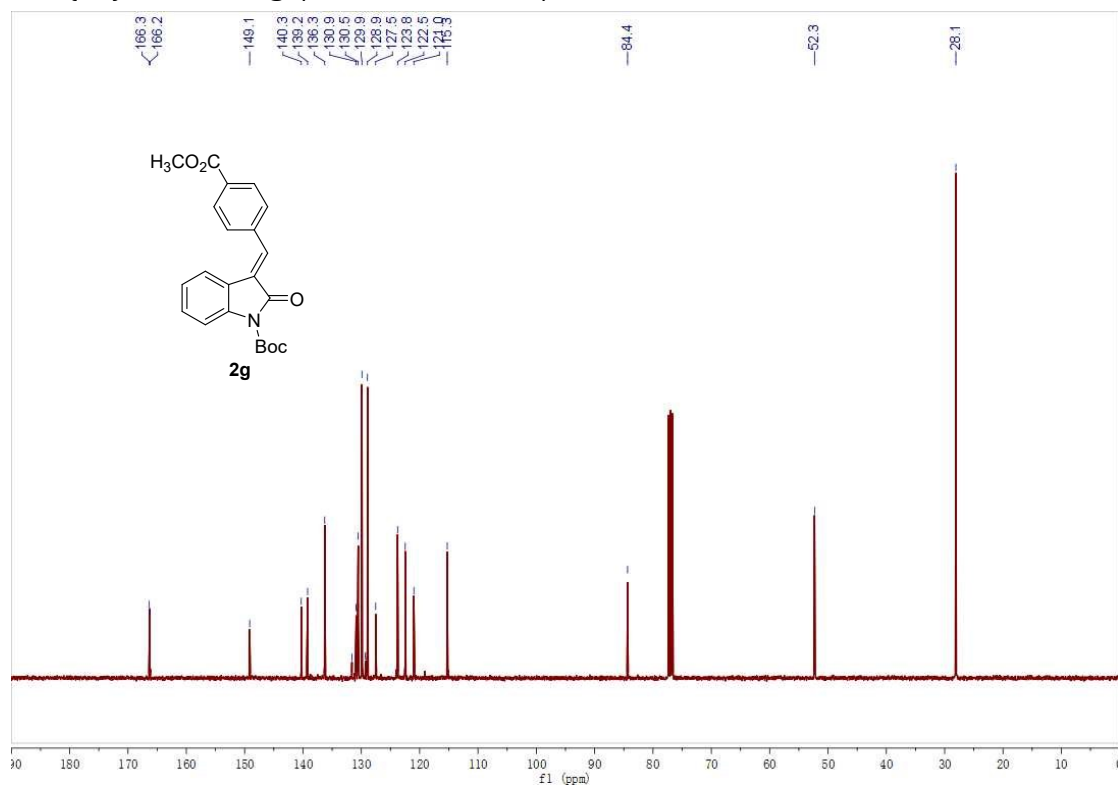

<sup>1</sup>H NMR of **2h** (400 MHz, CDCl<sub>3</sub>)

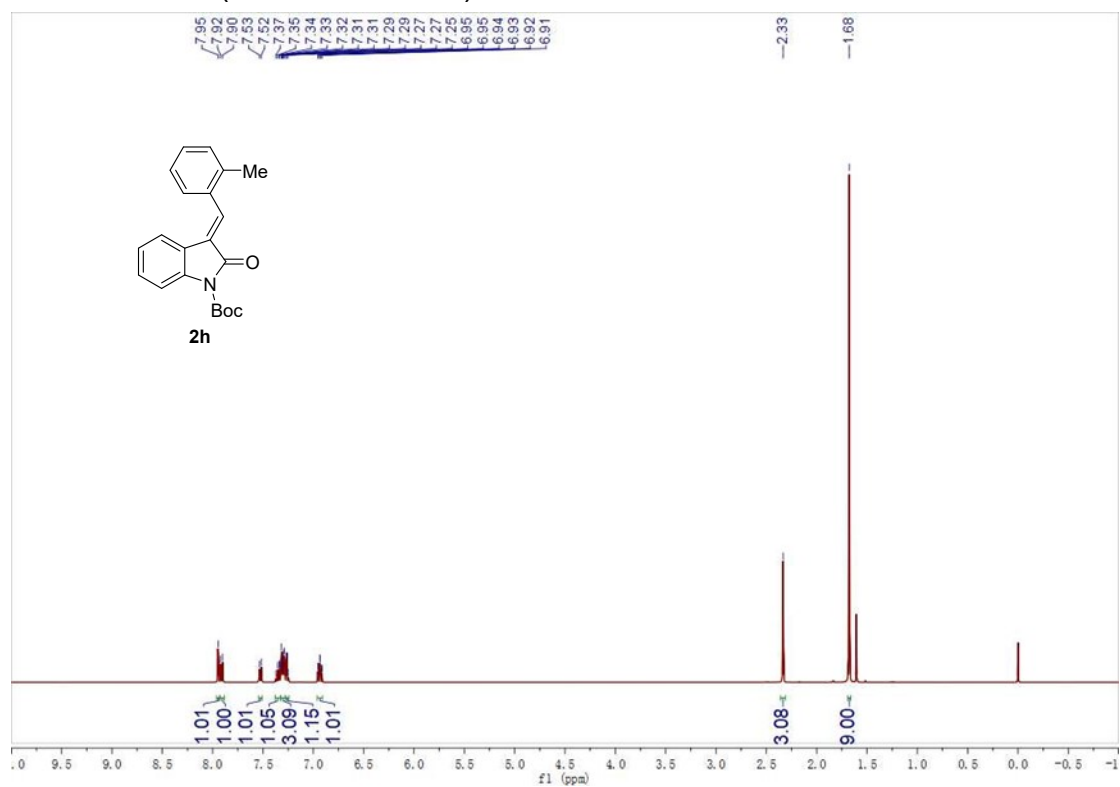

<sup>13</sup>C {<sup>1</sup>H} NMR of **2h** (100 MHz, CDCl<sub>3</sub>)

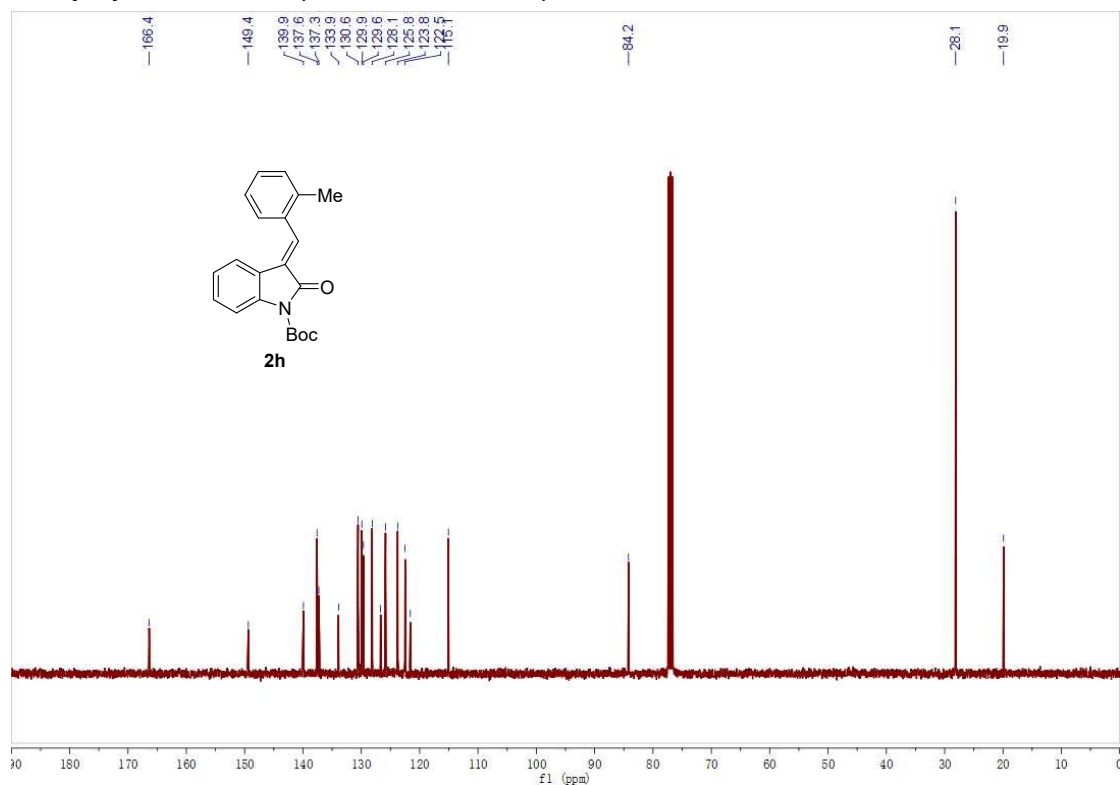

<sup>1</sup>H NMR of **2i** (400 MHz, CDCl<sub>3</sub>)

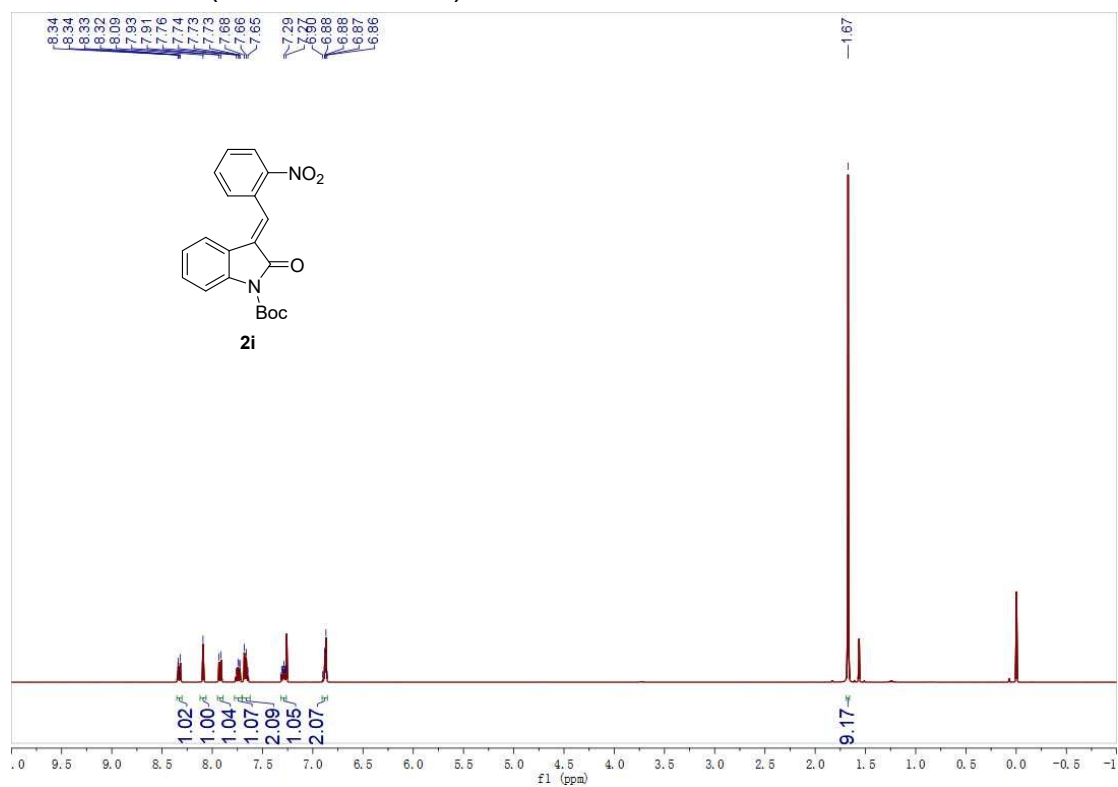

<sup>1</sup>H NMR of **2j** (400 MHz, CDCl<sub>3</sub>)

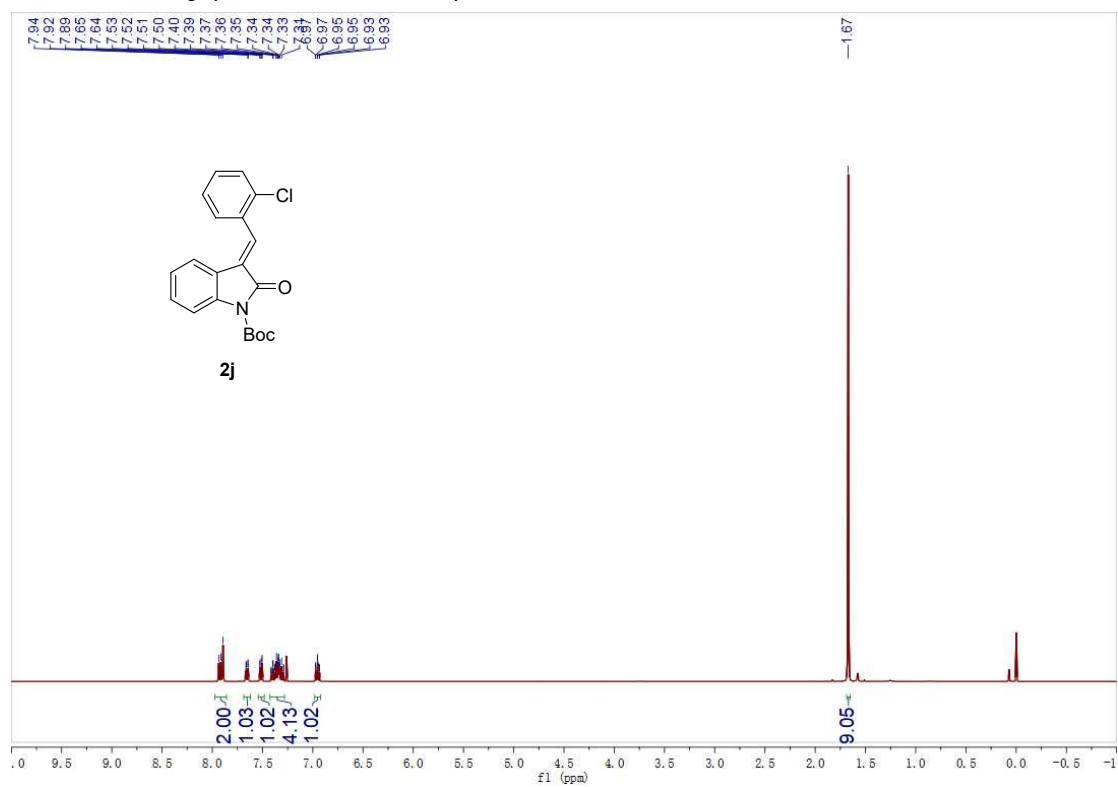

<sup>1</sup>H NMR of **2k** (400 MHz, CDCl<sub>3</sub>)

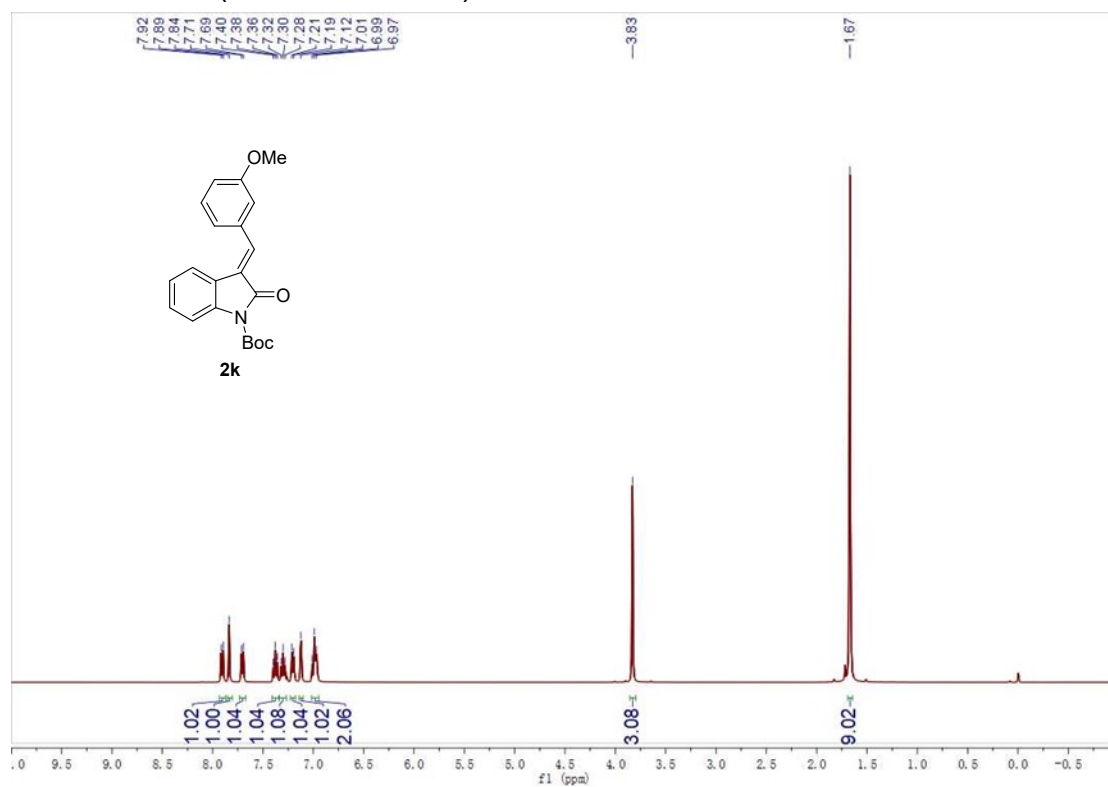

<sup>13</sup>C {<sup>1</sup>H} NMR of **2k** (100 MHz, CDCl<sub>3</sub>)

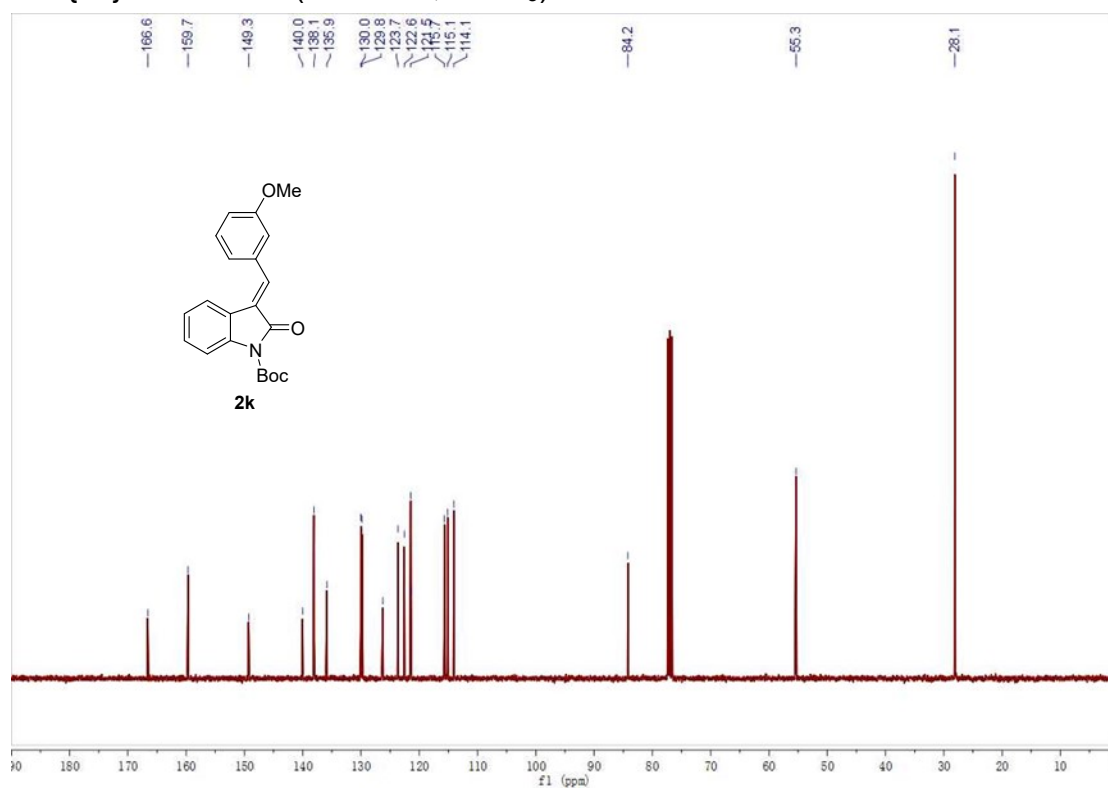

<sup>1</sup>H NMR of **2I** (400 MHz, CDCl<sub>3</sub>)

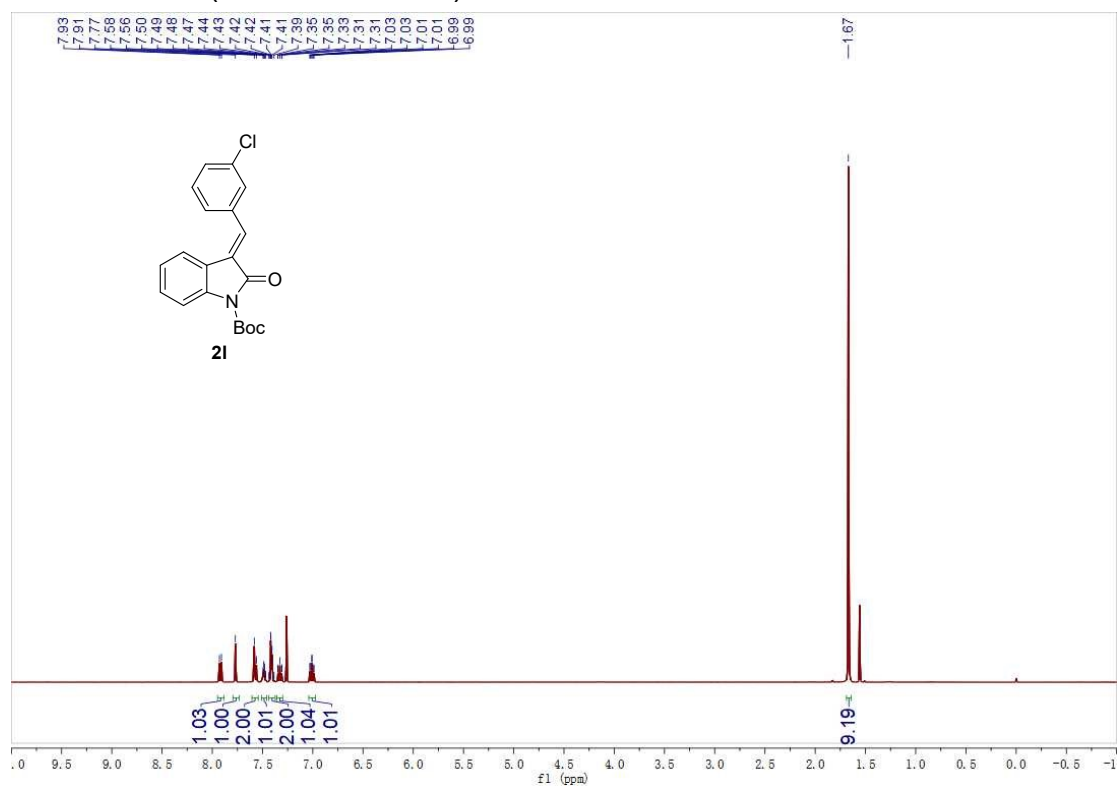

<sup>13</sup>C {<sup>1</sup>H} NMR of **2I** (100 MHz, CDCl<sub>3</sub>)

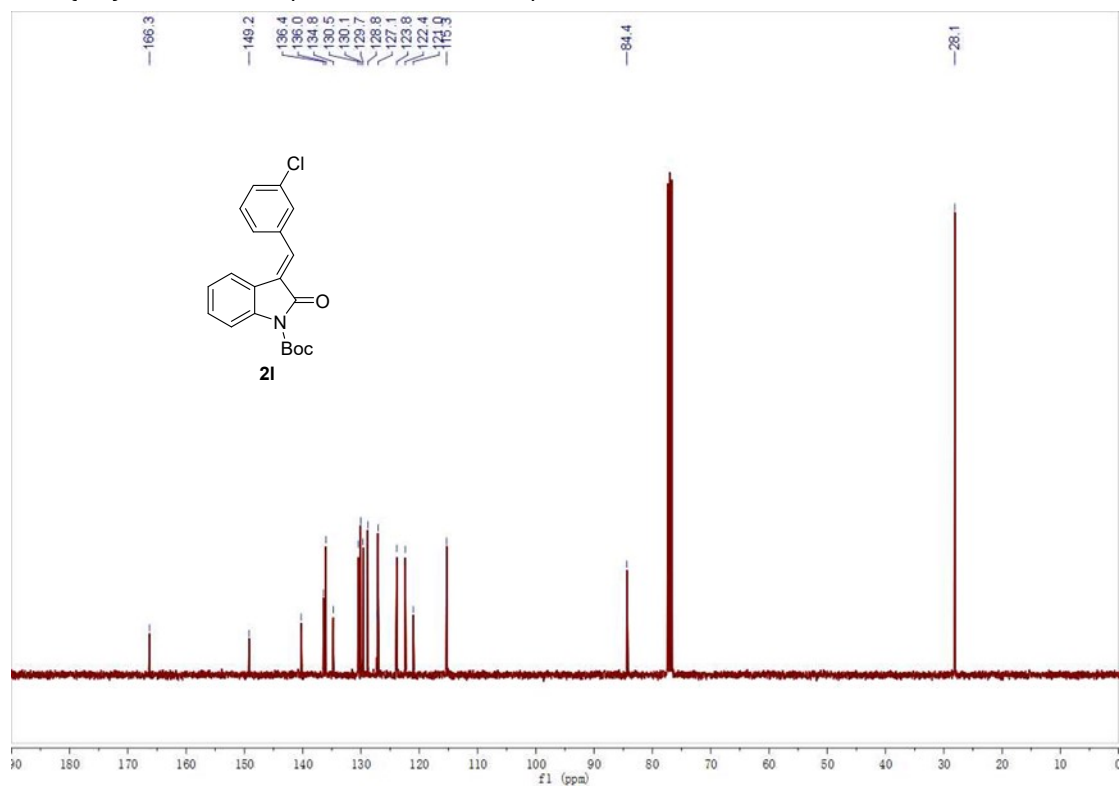

$^1\text{H}$  NMR of **2m** (400 MHz,  $\text{CDCl}_3$ )

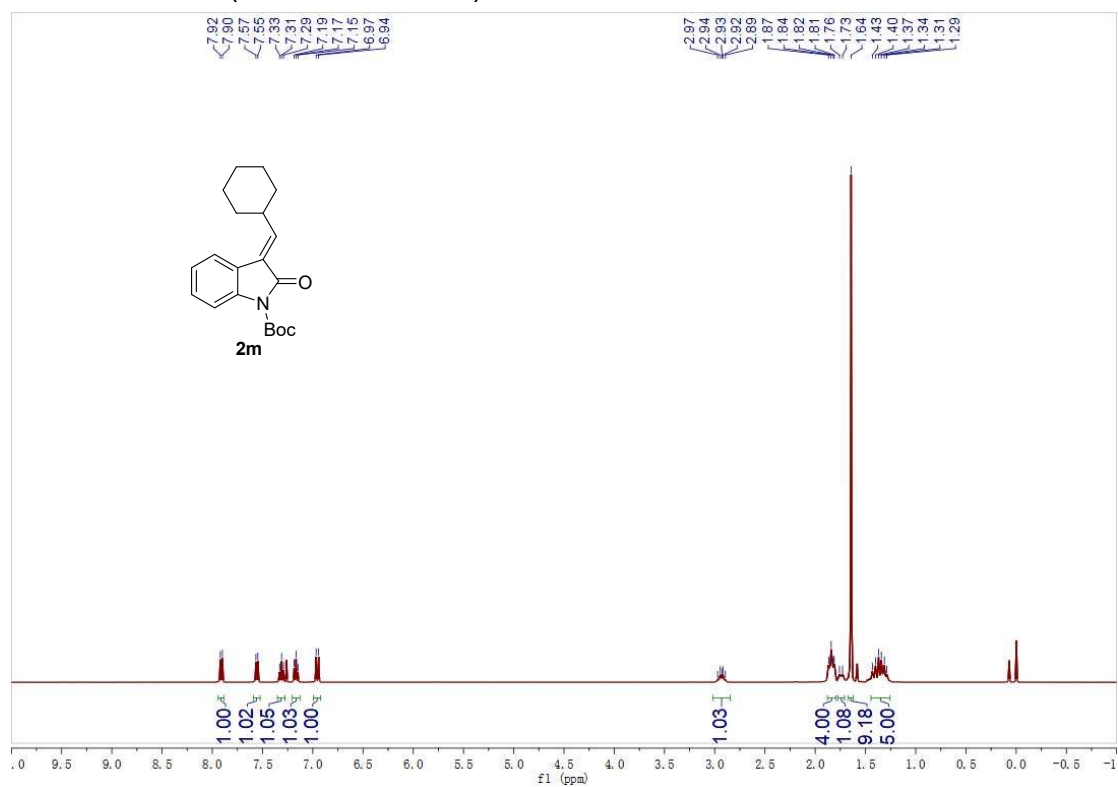

$^{13}\text{C}$   $\{^1\text{H}\}$  NMR of **2m** (100 MHz,  $\text{CDCl}_3$ )

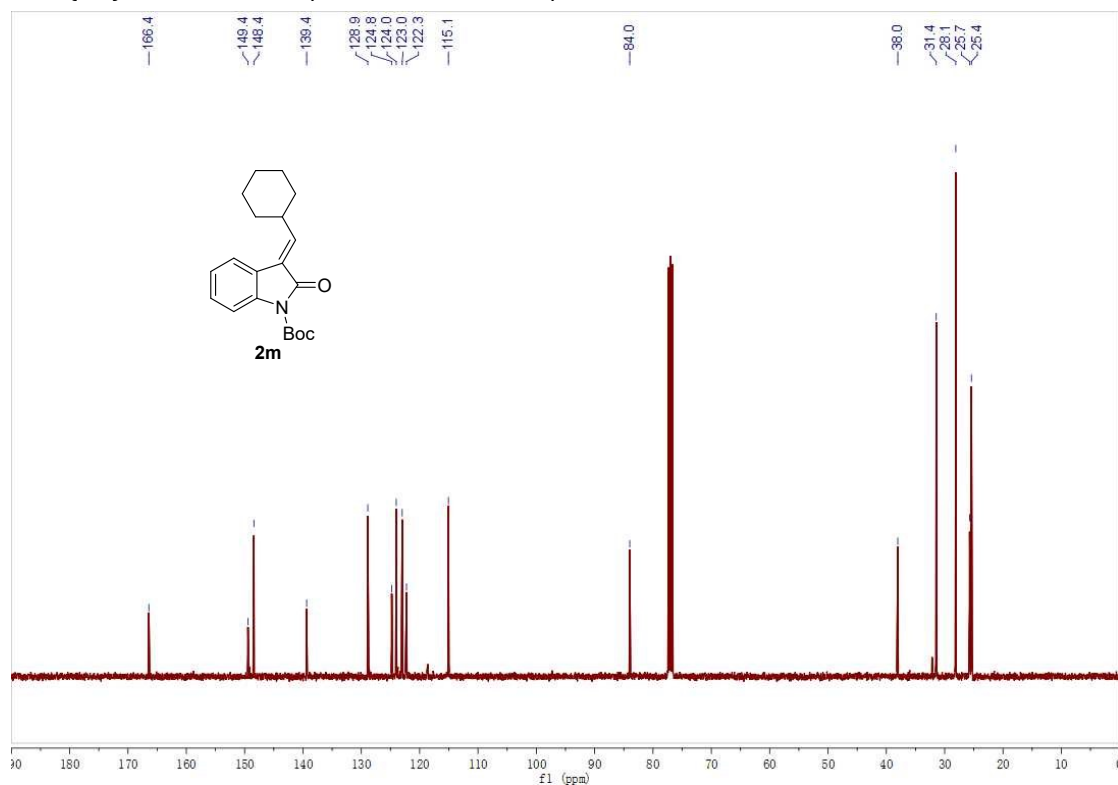

**<sup>1</sup>H NMR of 2n (400 MHz, CDCl<sub>3</sub>)**

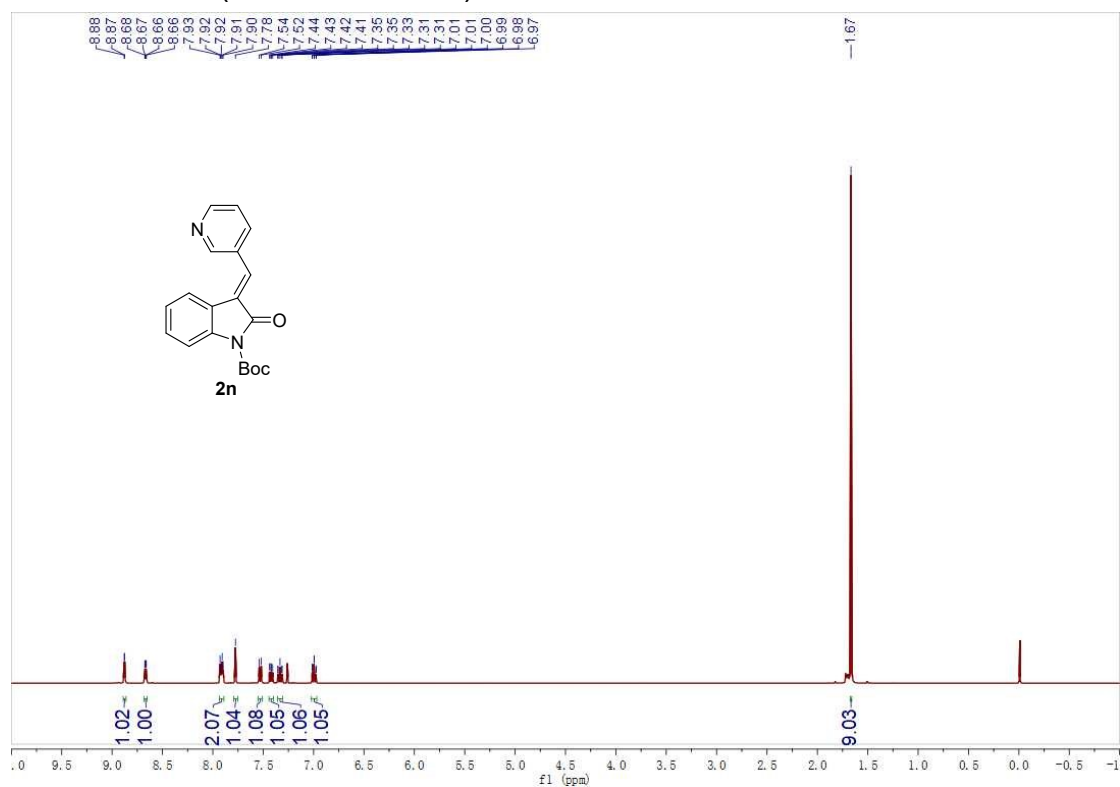

**<sup>13</sup>C {<sup>1</sup>H} NMR of 2n (100 MHz, CDCl<sub>3</sub>)**

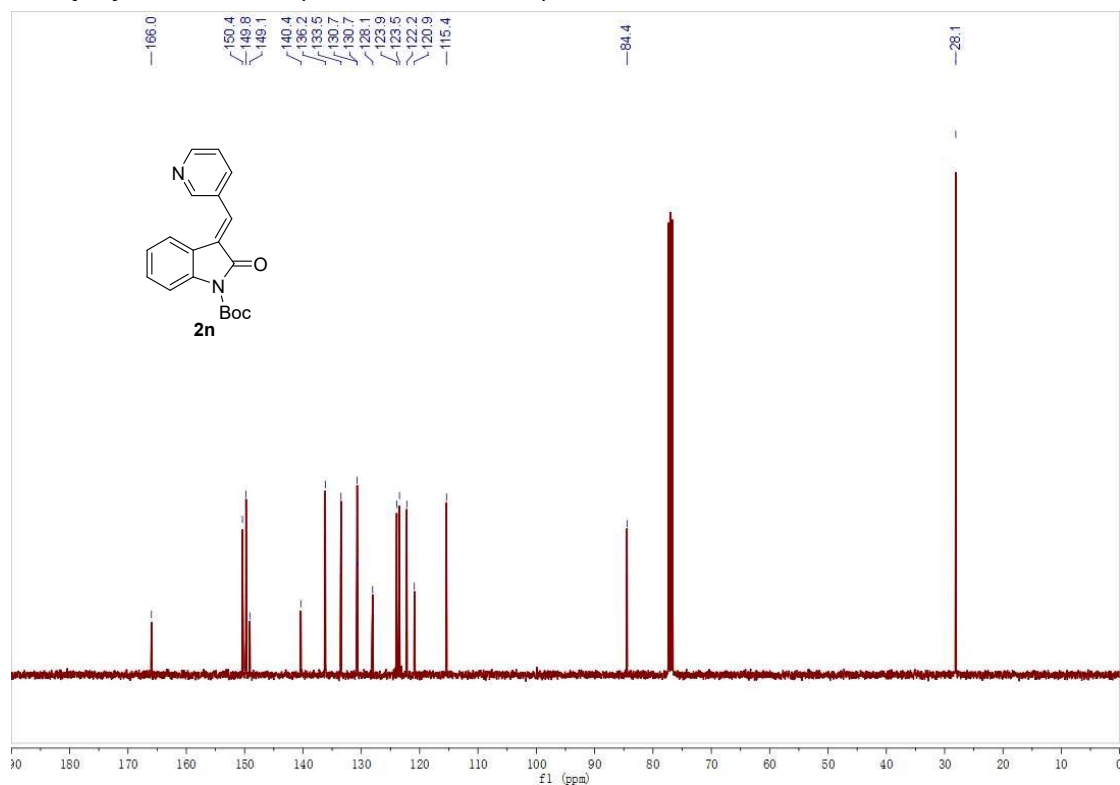

<sup>1</sup>H NMR of **2o** (400 MHz, CDCl<sub>3</sub>)

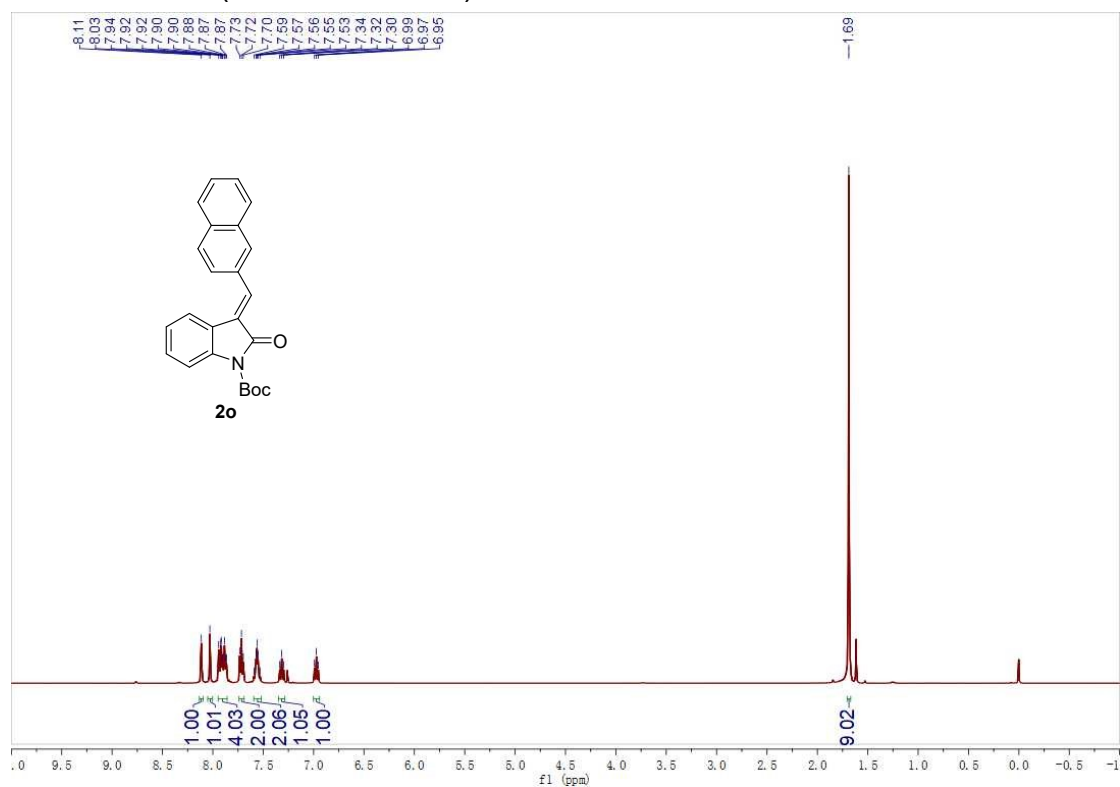

<sup>13</sup>C {<sup>1</sup>H} NMR of **2o** (100 MHz, CDCl<sub>3</sub>)

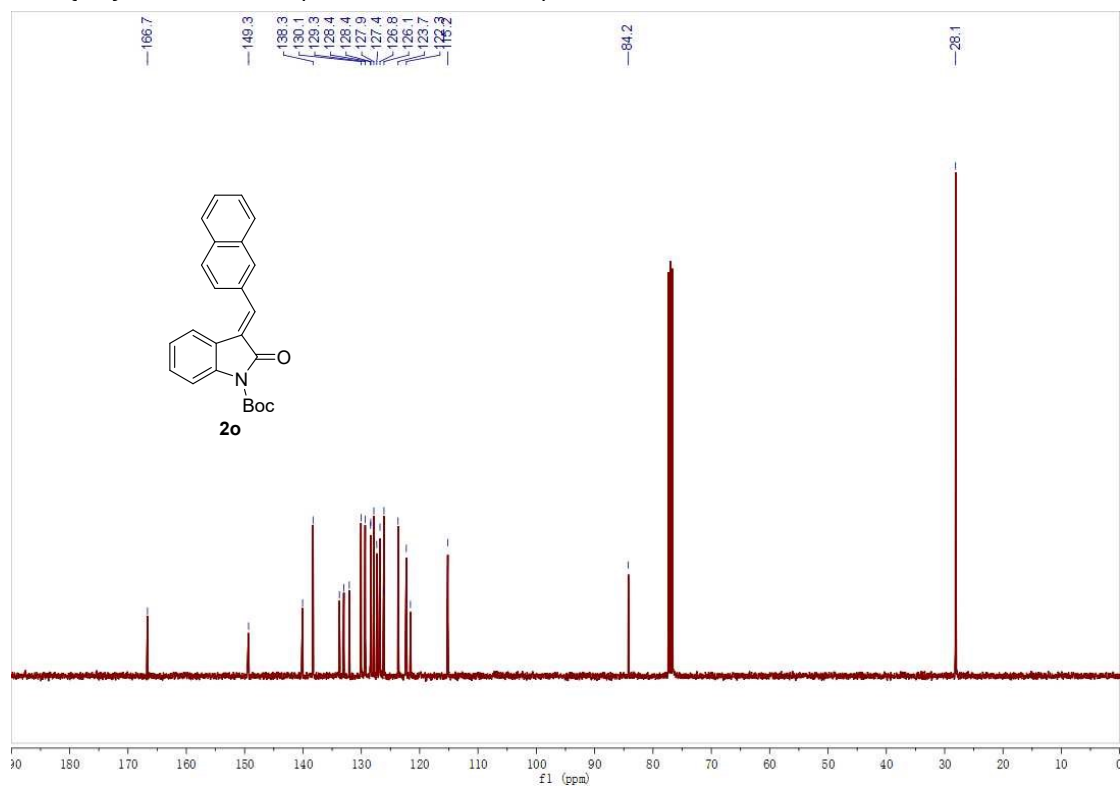



**<sup>1</sup>H NMR of 2p (400 MHz, CDCl<sub>3</sub>)**

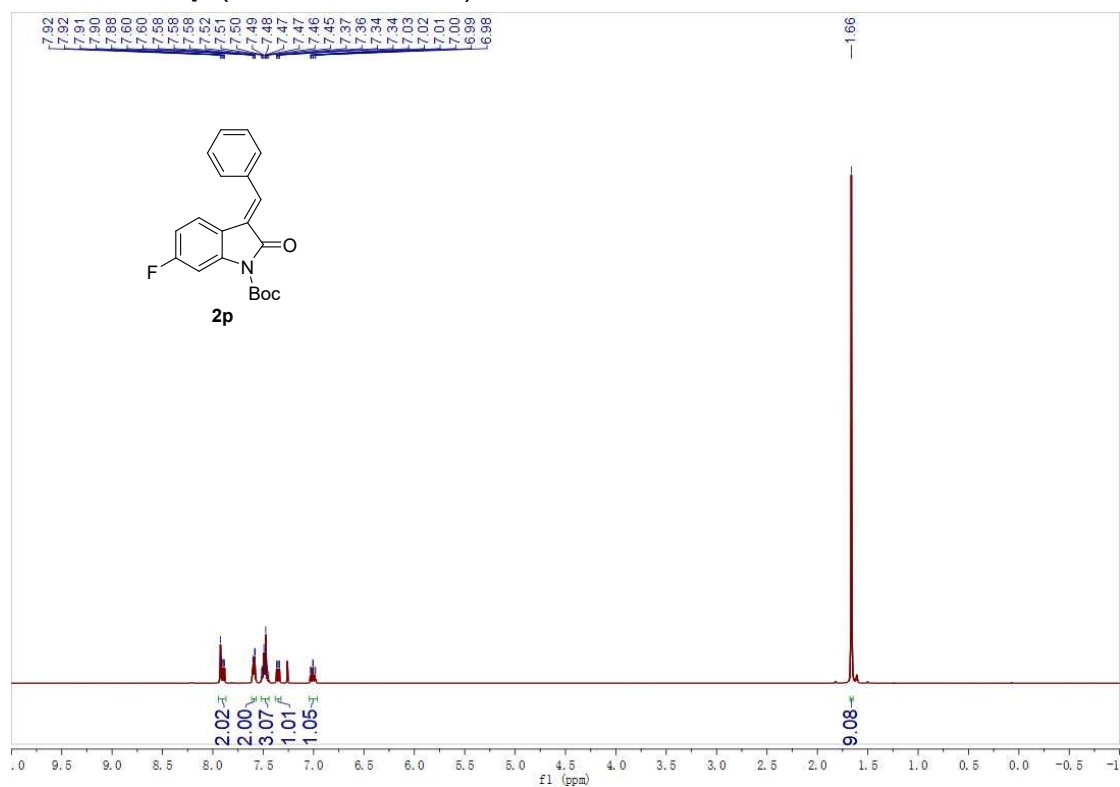

**<sup>13</sup>C {<sup>1</sup>H} NMR of 2p (100 MHz, CDCl<sub>3</sub>)**

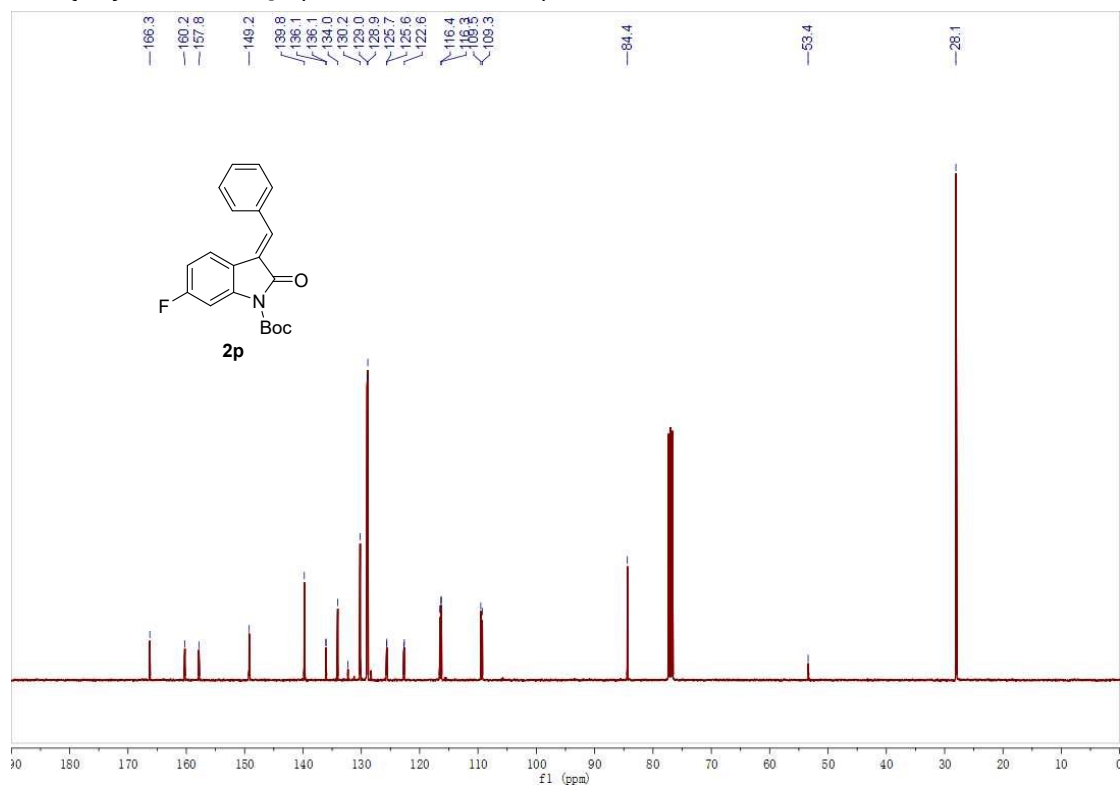

$^{19}\text{F}$  NMR of **2p** (376 MHz,  $\text{CDCl}_3$ )

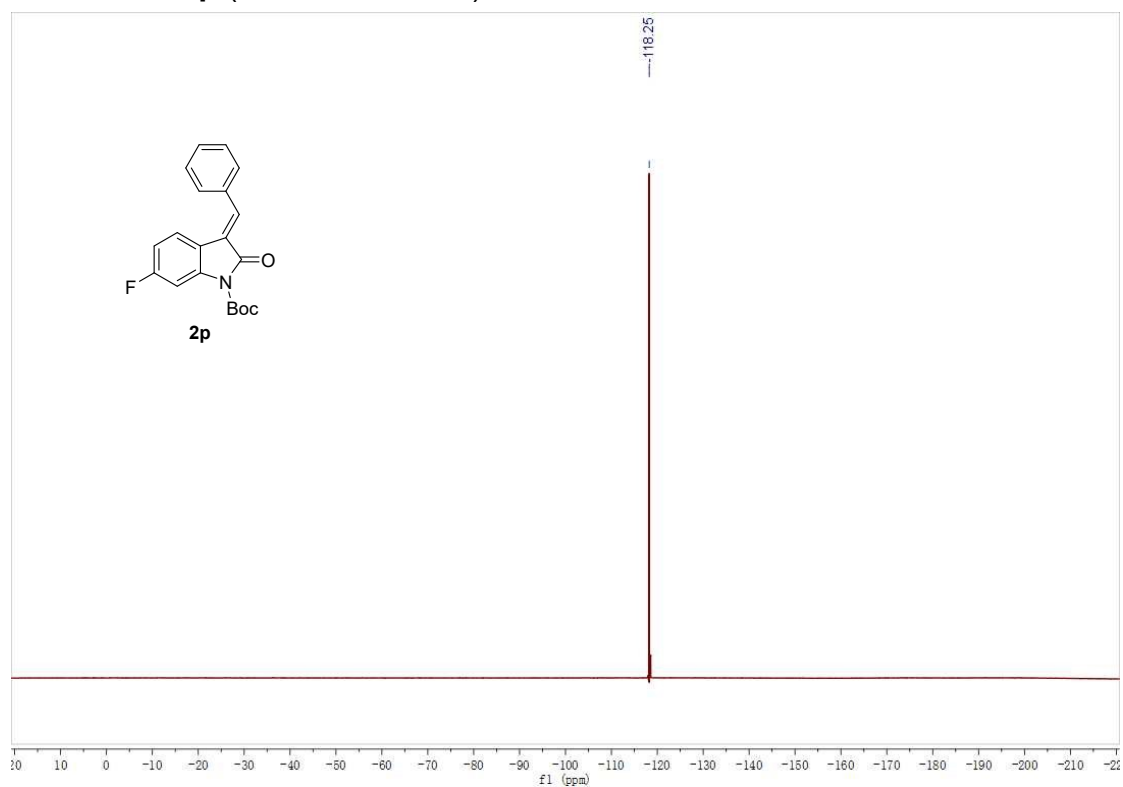

$^1\text{H}$  NMR of **2q** (400 MHz,  $\text{CDCl}_3$ )

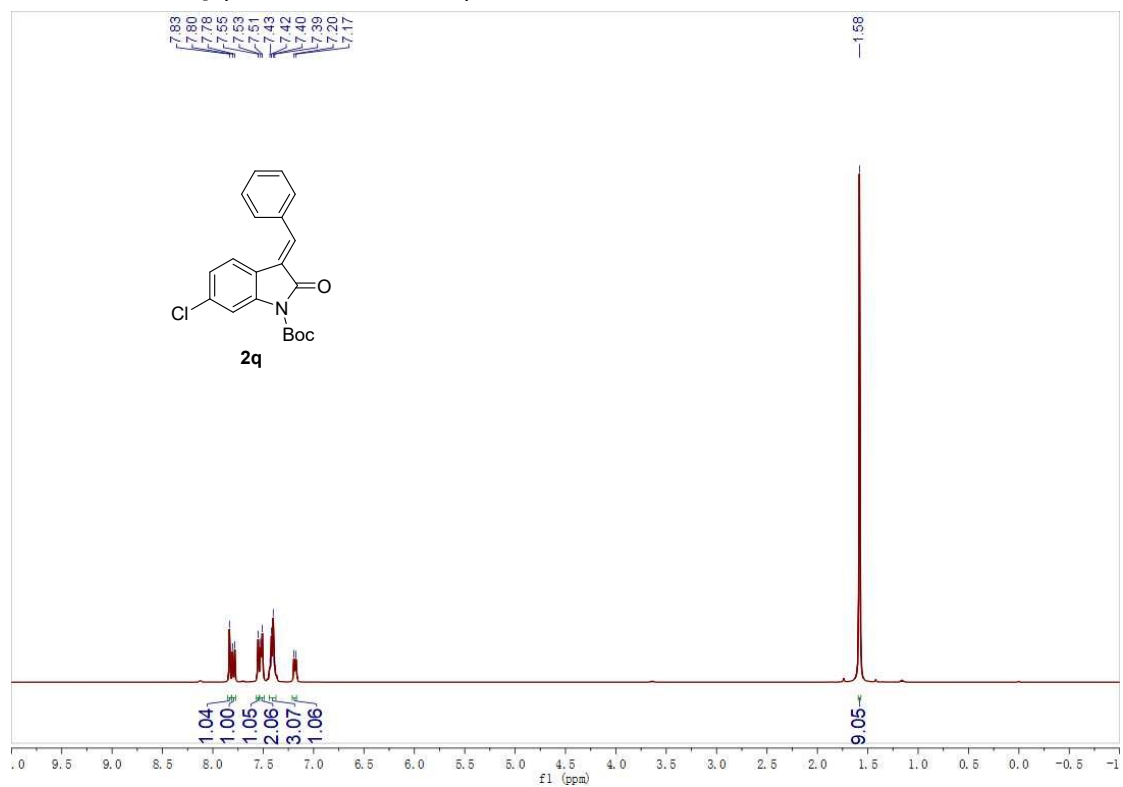

<sup>1</sup>H NMR of **2r** (400 MHz, CDCl<sub>3</sub>)

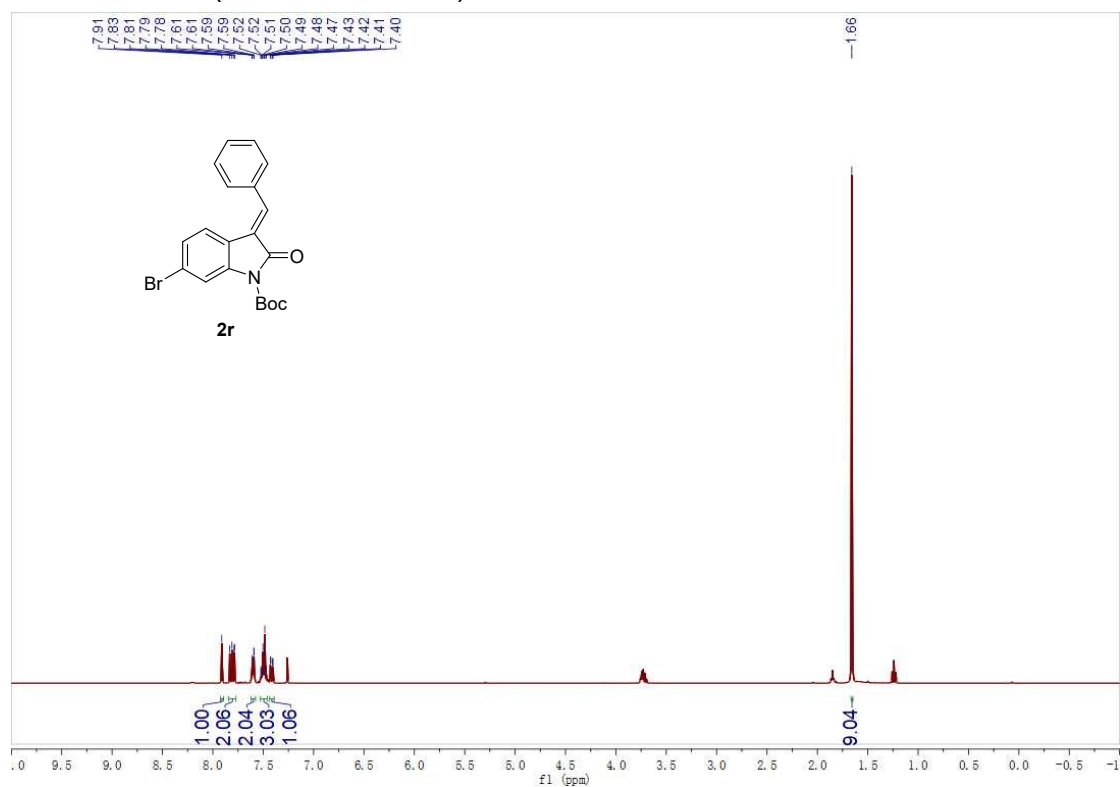

<sup>1</sup>H NMR of **2s** (400 MHz, CDCl<sub>3</sub>)

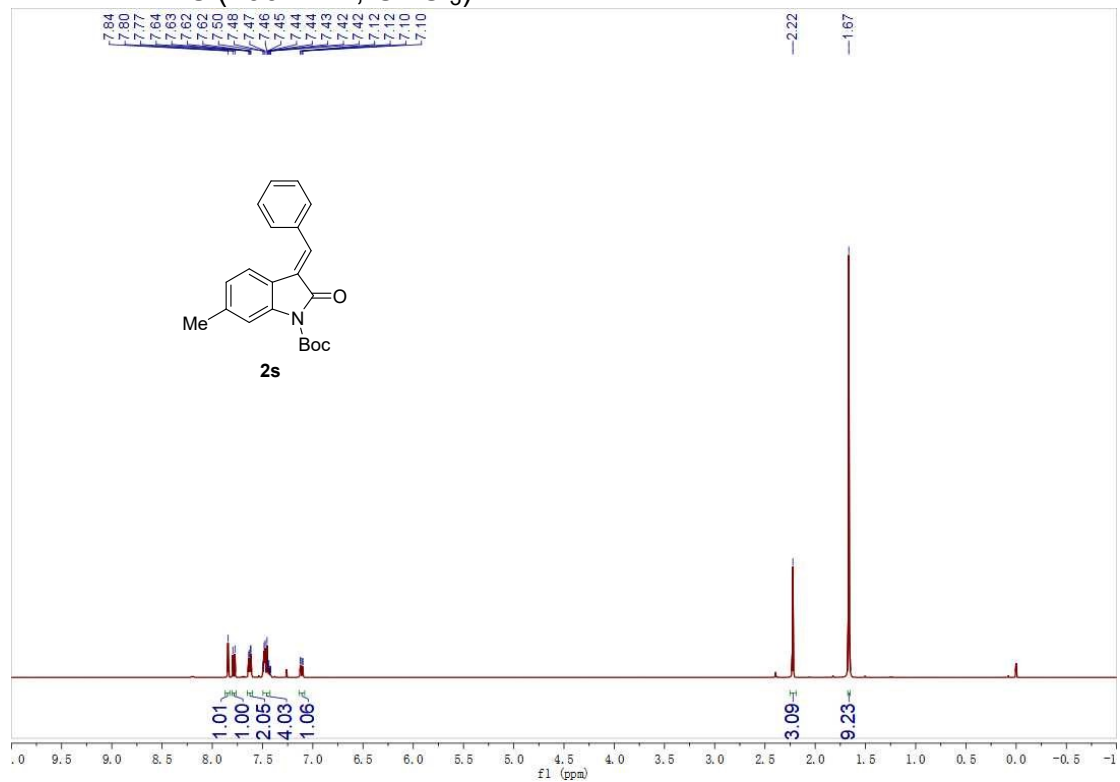

$^{13}\text{C}$   $\{^1\text{H}\}$  NMR of **2s** (100 MHz,  $\text{CDCl}_3$ )

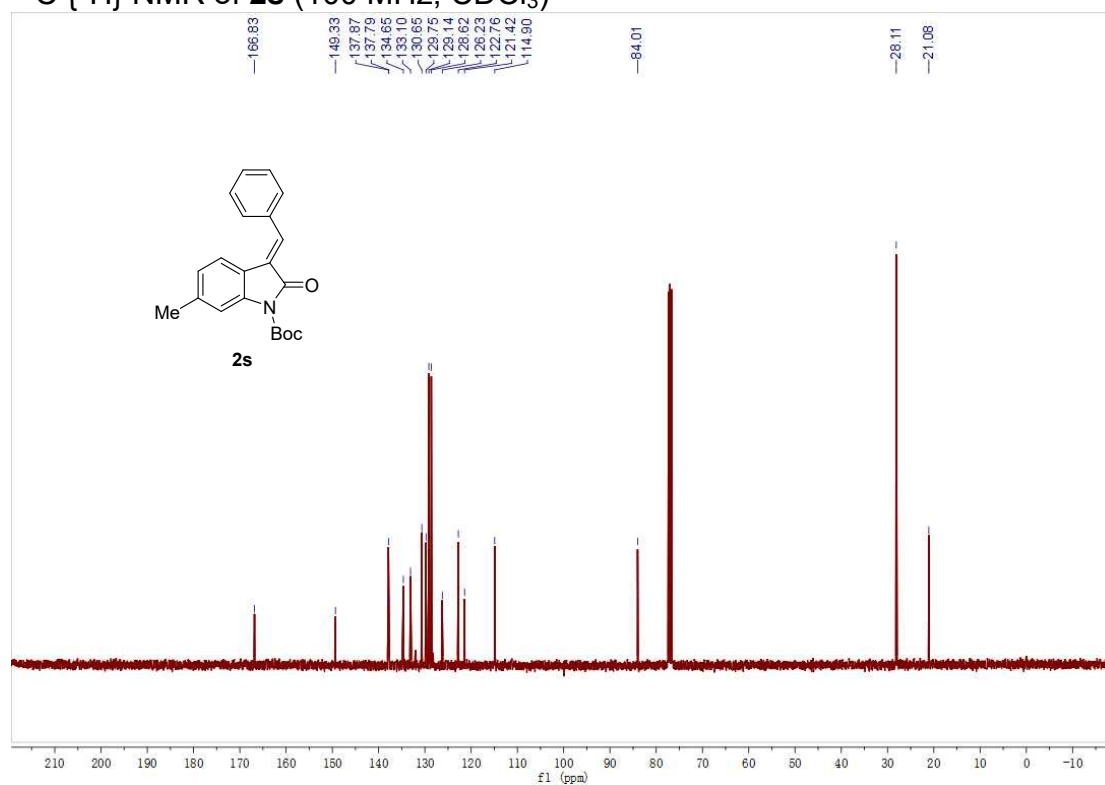

$^1\text{H}$  NMR of **2t** (400 MHz,  $\text{CDCl}_3$ )

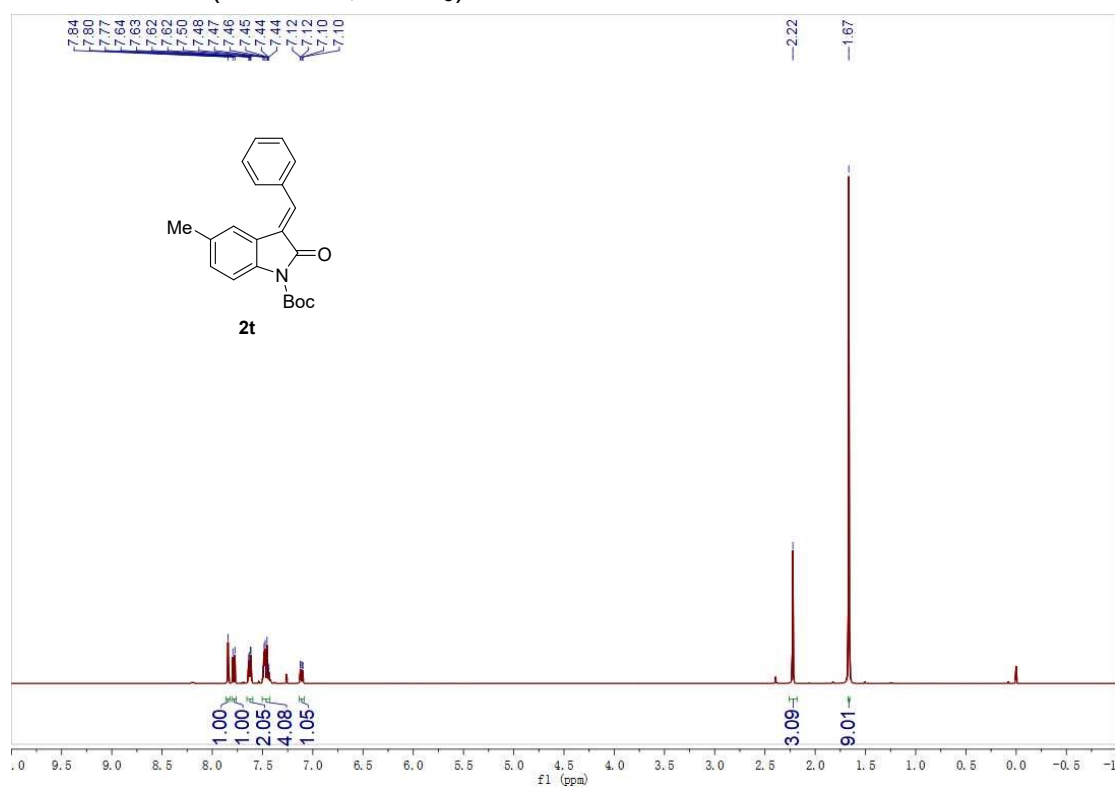

$^{13}\text{C}$   $\{^1\text{H}\}$  NMR of **2t** (100 MHz,  $\text{CDCl}_3$ )

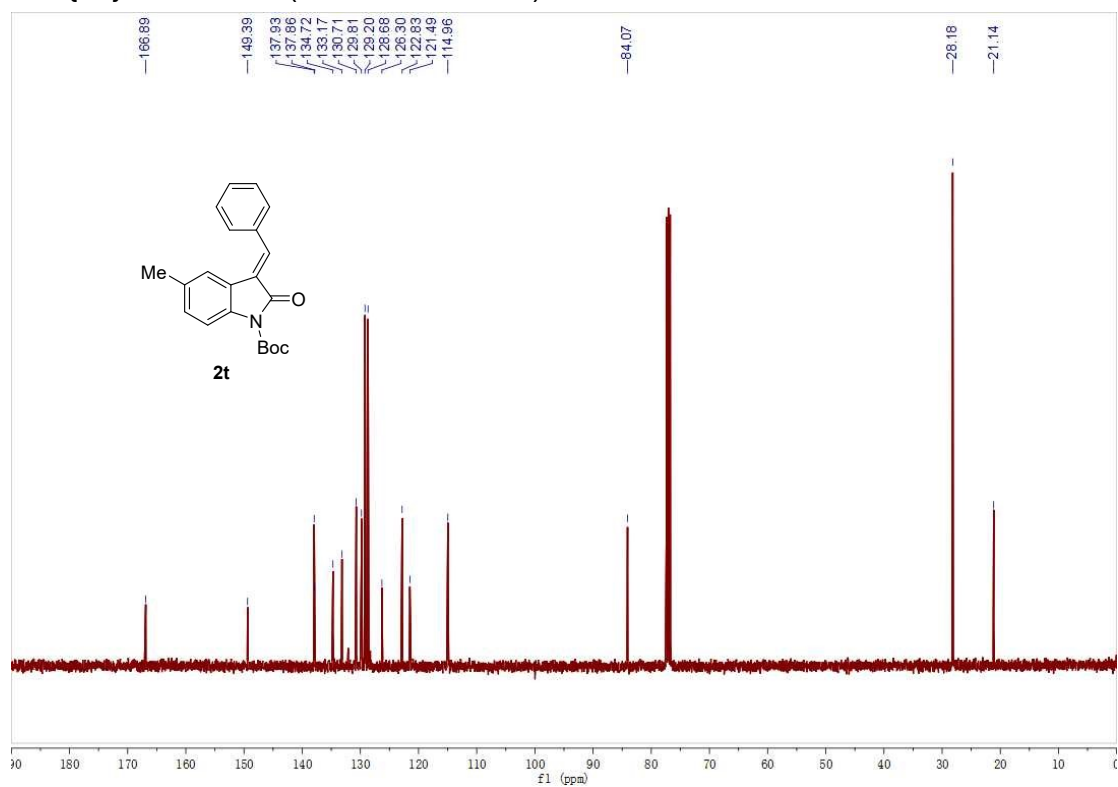

$^1\text{H}$  NMR of **2u** (400 MHz,  $\text{CDCl}_3$ )

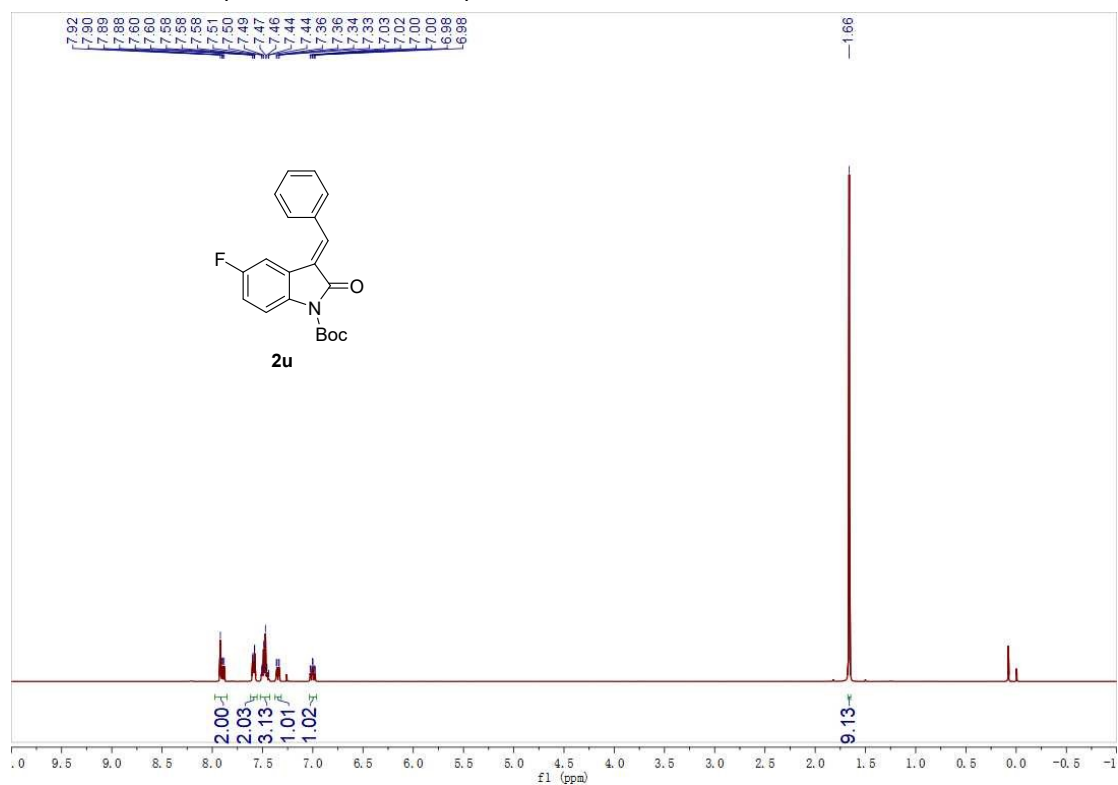

$^{13}\text{C}$   $\{^1\text{H}\}$  NMR of **2u** (100 MHz,  $\text{CDCl}_3$ )

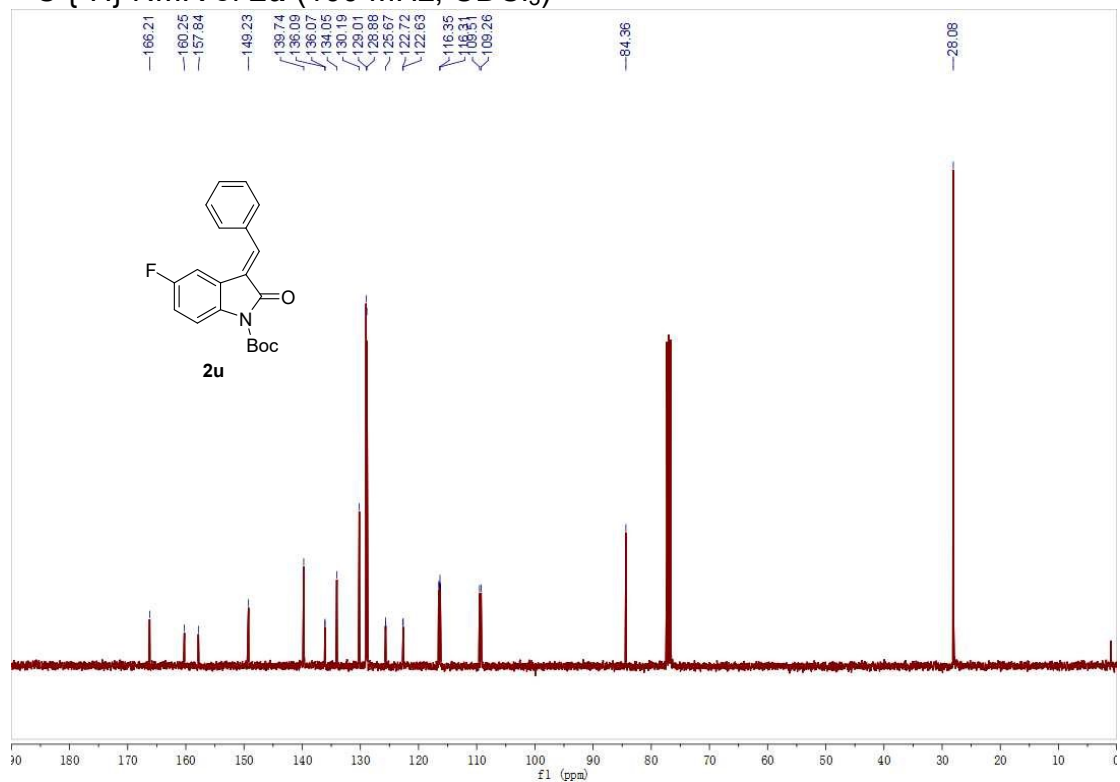

$^{19}\text{F}$  NMR of **2u** (376 MHz,  $\text{CDCl}_3$ )

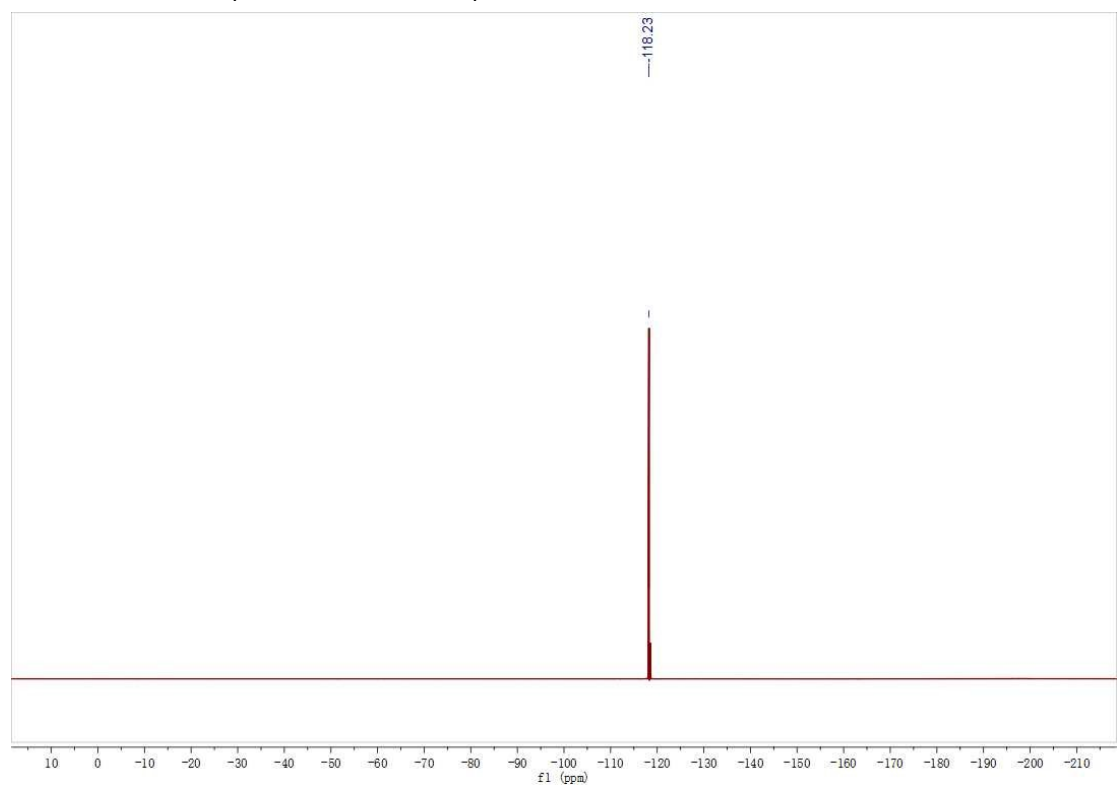

$^1\text{H}$  NMR of **2v** (400 MHz,  $\text{CDCl}_3$ )

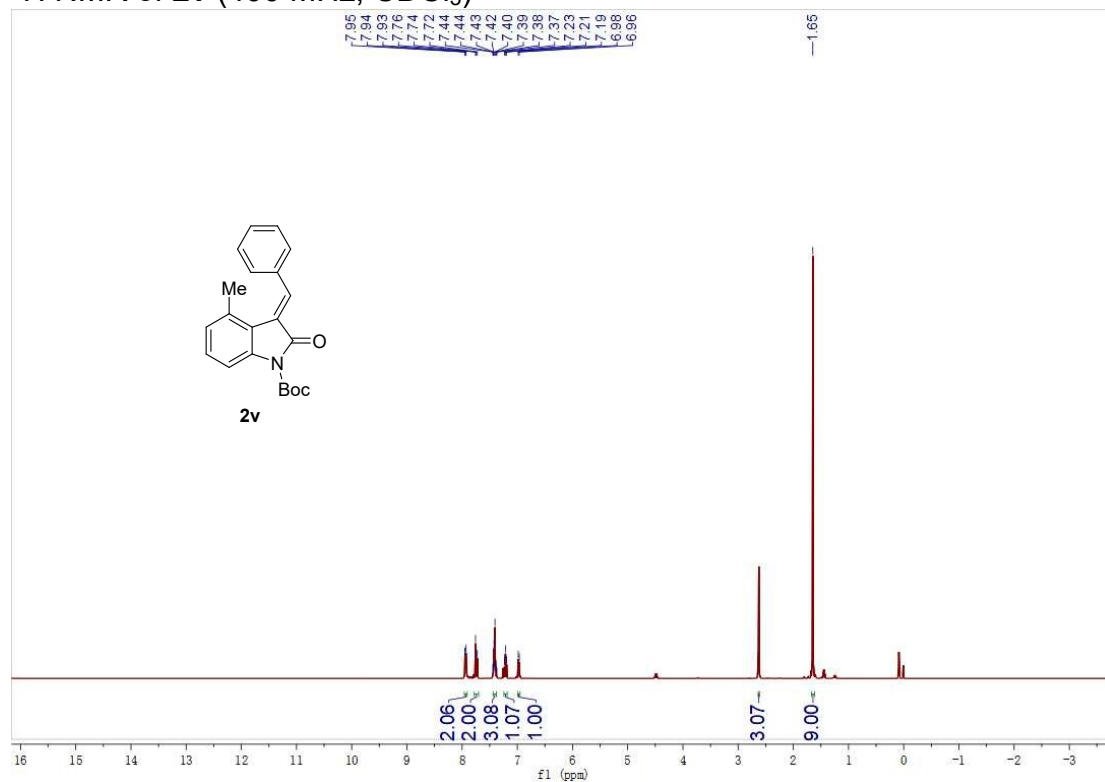

$^{13}\text{C}$   $\{^1\text{H}\}$  NMR of **2v** (100 MHz,  $\text{CDCl}_3$ )

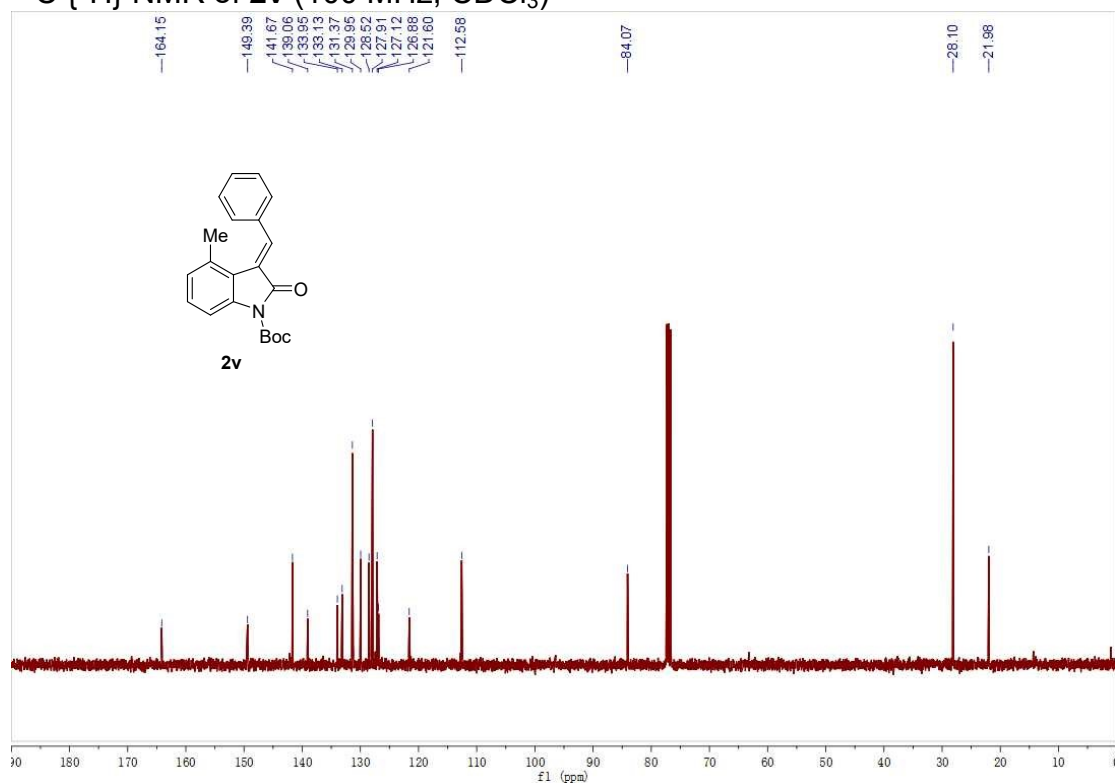

$^1\text{H}$  NMR of **2w** (400 MHz,  $\text{CDCl}_3$ )

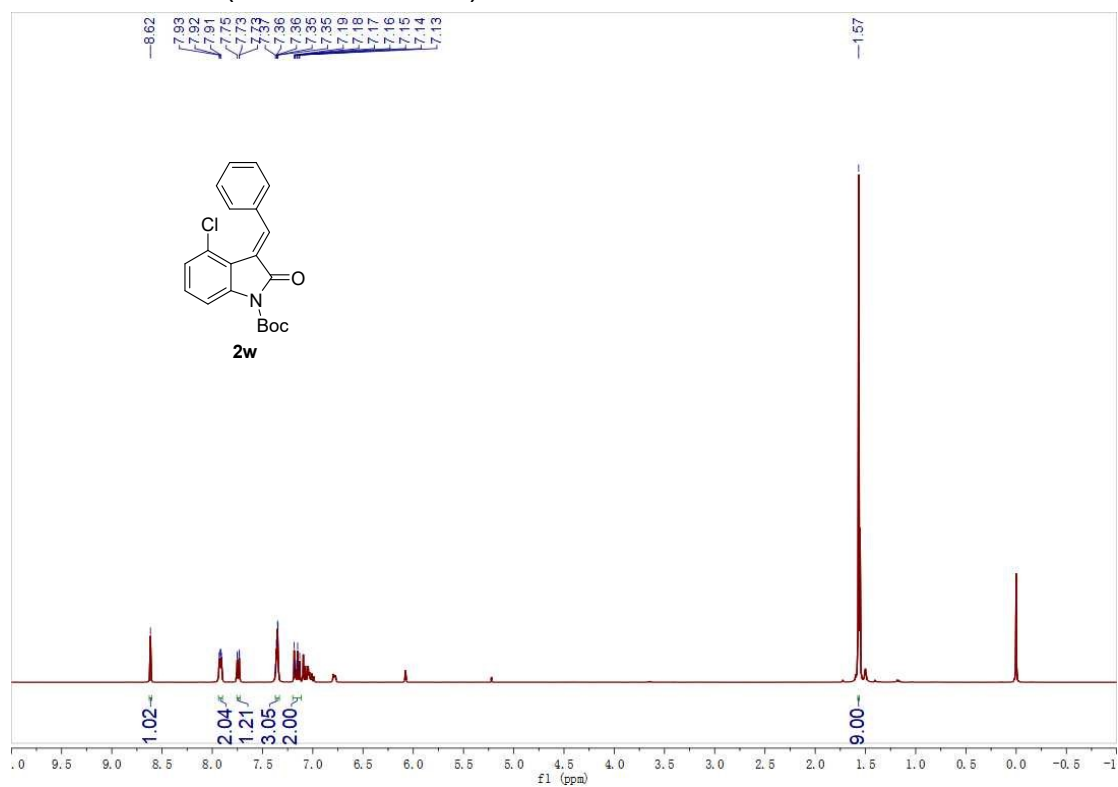

$^{13}\text{C}$   $\{^1\text{H}\}$  NMR of **2w** (100 MHz,  $\text{CDCl}_3$ )

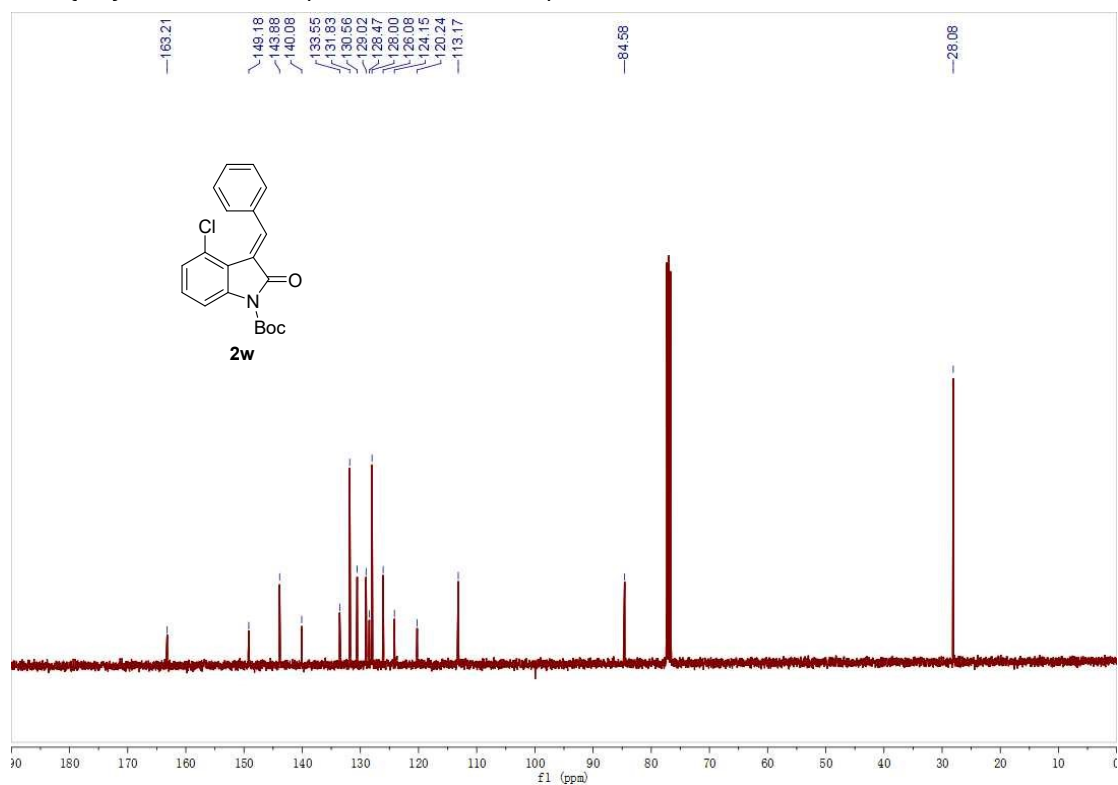



<sup>1</sup>H NMR of **2x** (400 MHz, CDCl<sub>3</sub>)

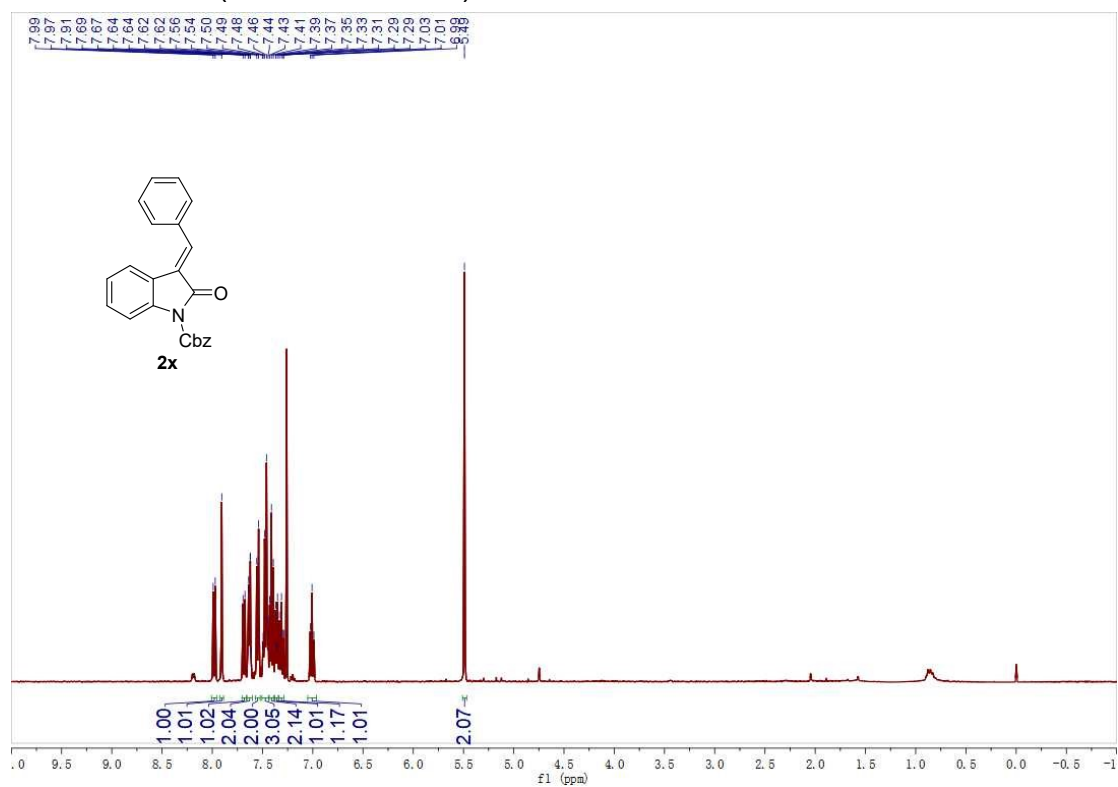

<sup>1</sup>H NMR of **2y** (400 MHz, CDCl<sub>3</sub>)

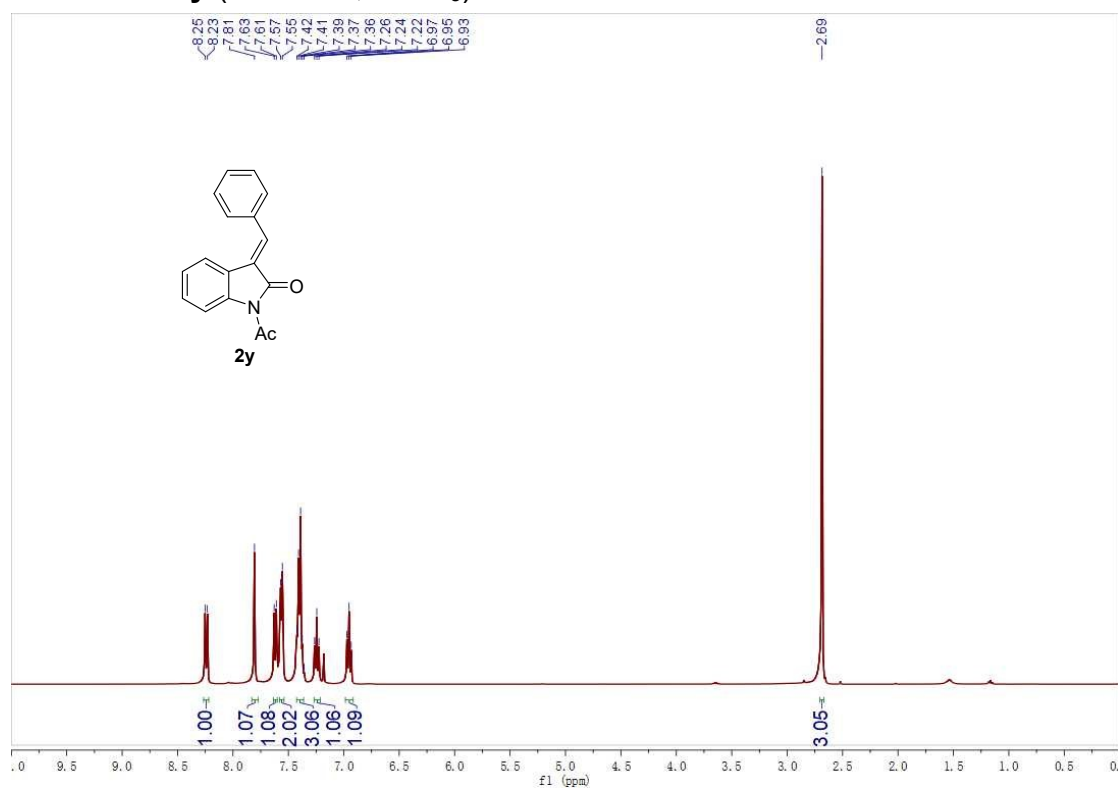

<sup>1</sup>H NMR of **1a** (400 MHz, CDCl<sub>3</sub>)

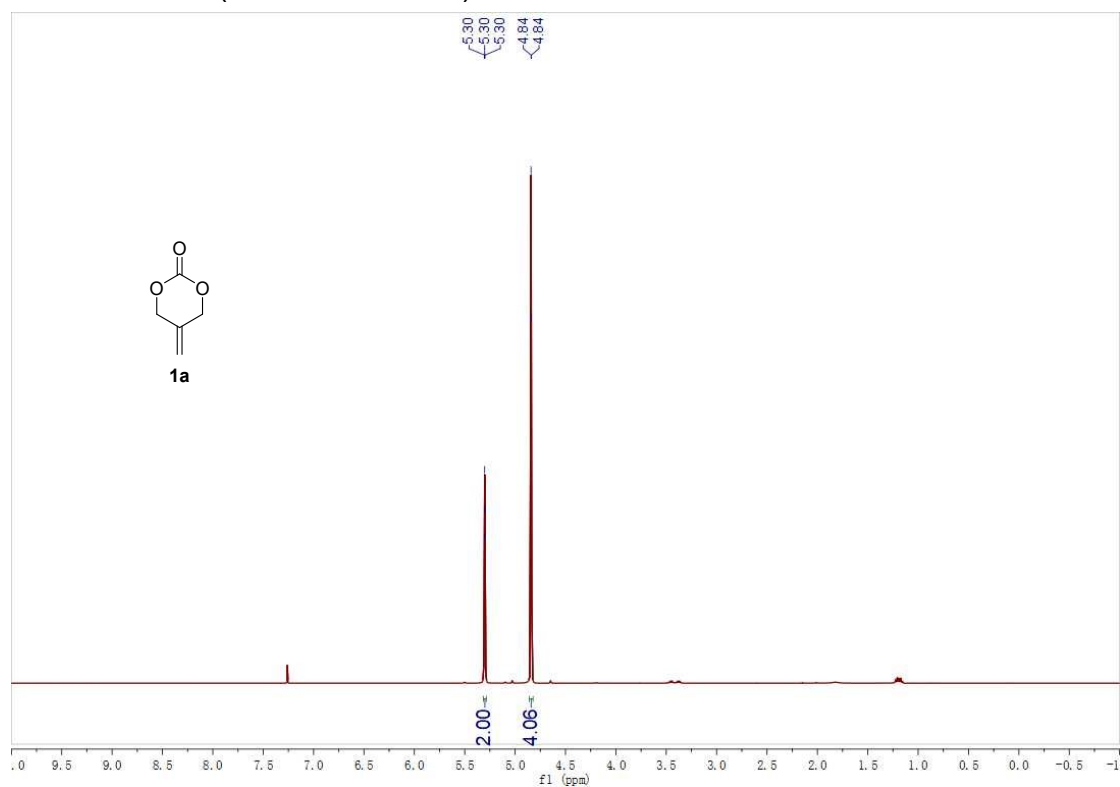

<sup>1</sup>H NMR of **1b** (400 MHz, CDCl<sub>3</sub>)

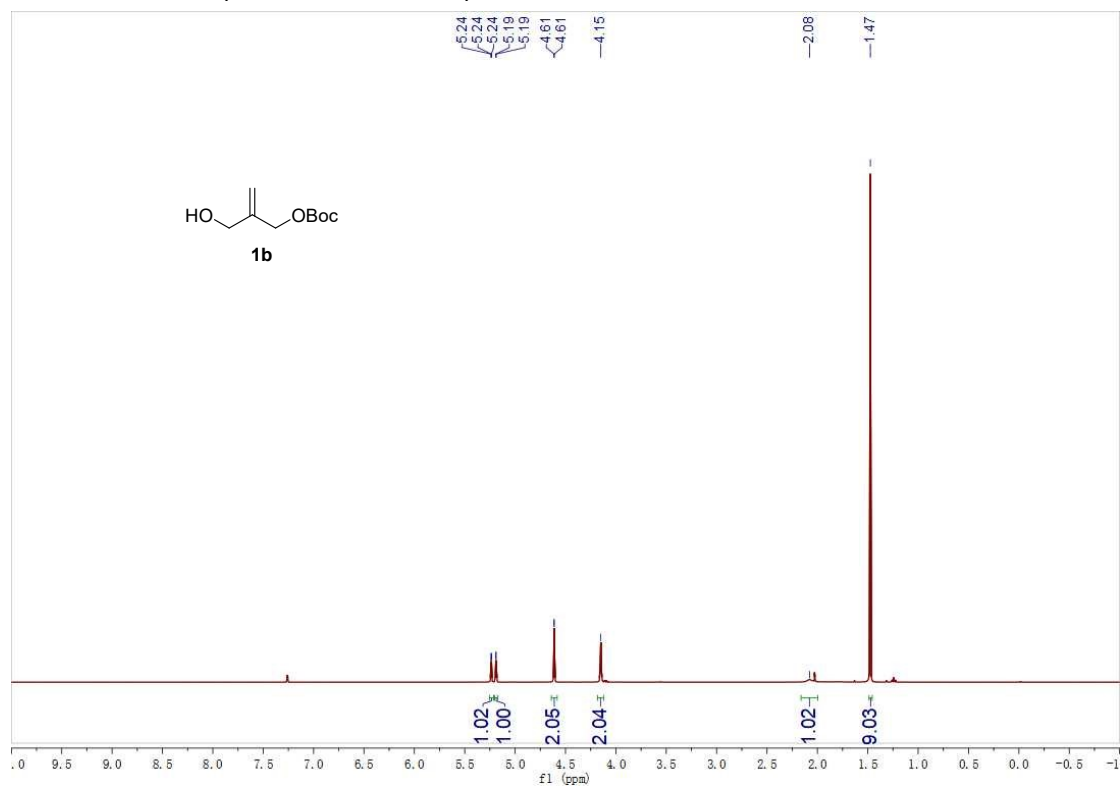

$^1\text{H}$  NMR of **3a** (400 MHz,  $\text{CDCl}_3$ )

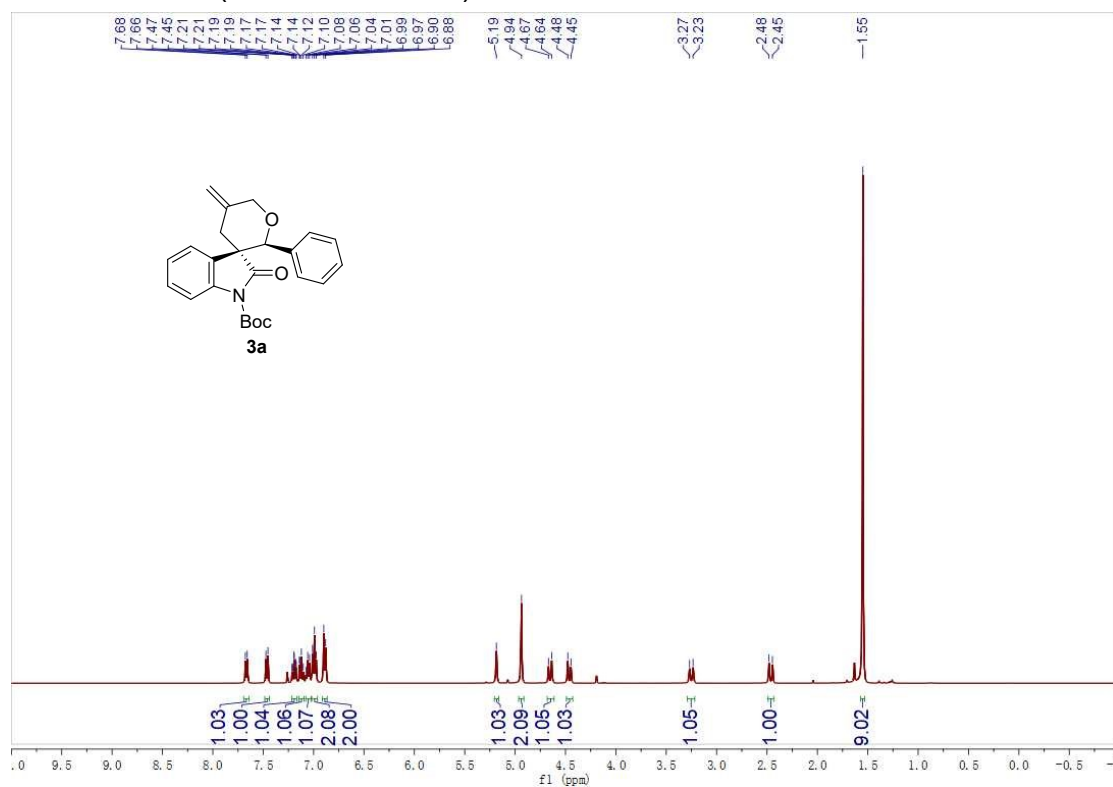

$^{13}\text{C}$   $\{^1\text{H}\}$  NMR of **3a** (100 MHz,  $\text{CDCl}_3$ )

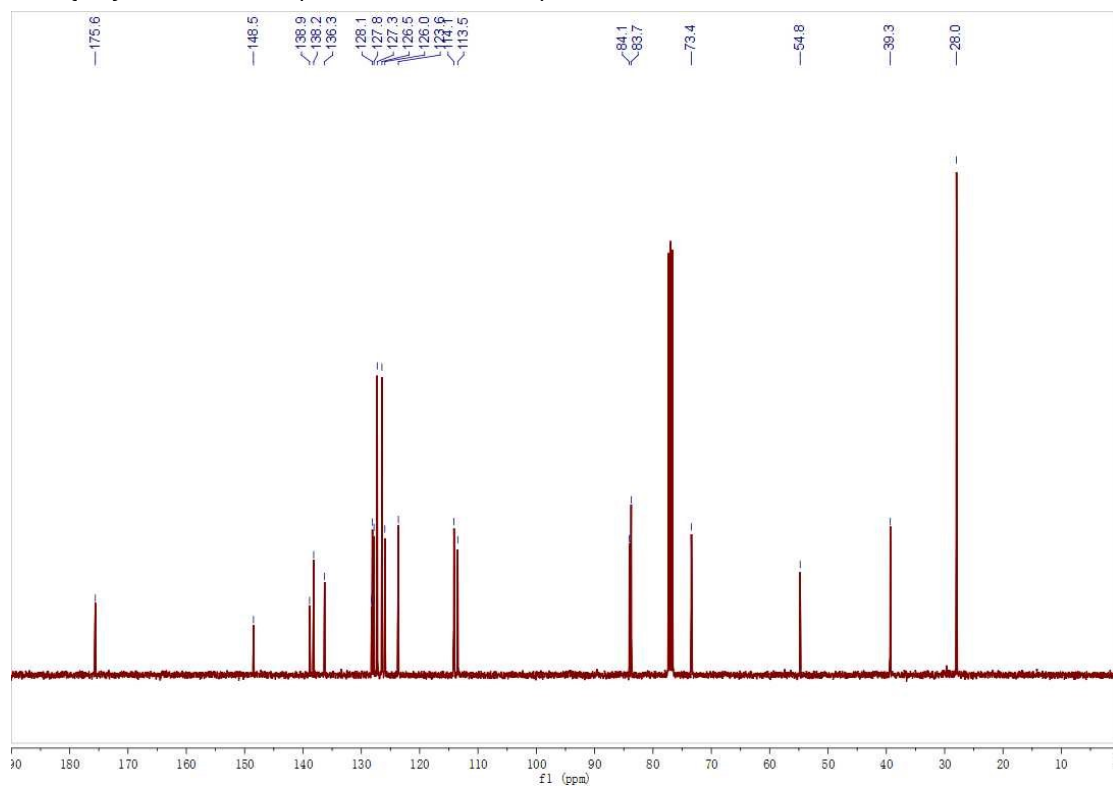

$^1\text{H}$  NMR of **3b** (400 MHz,  $\text{CDCl}_3$ )

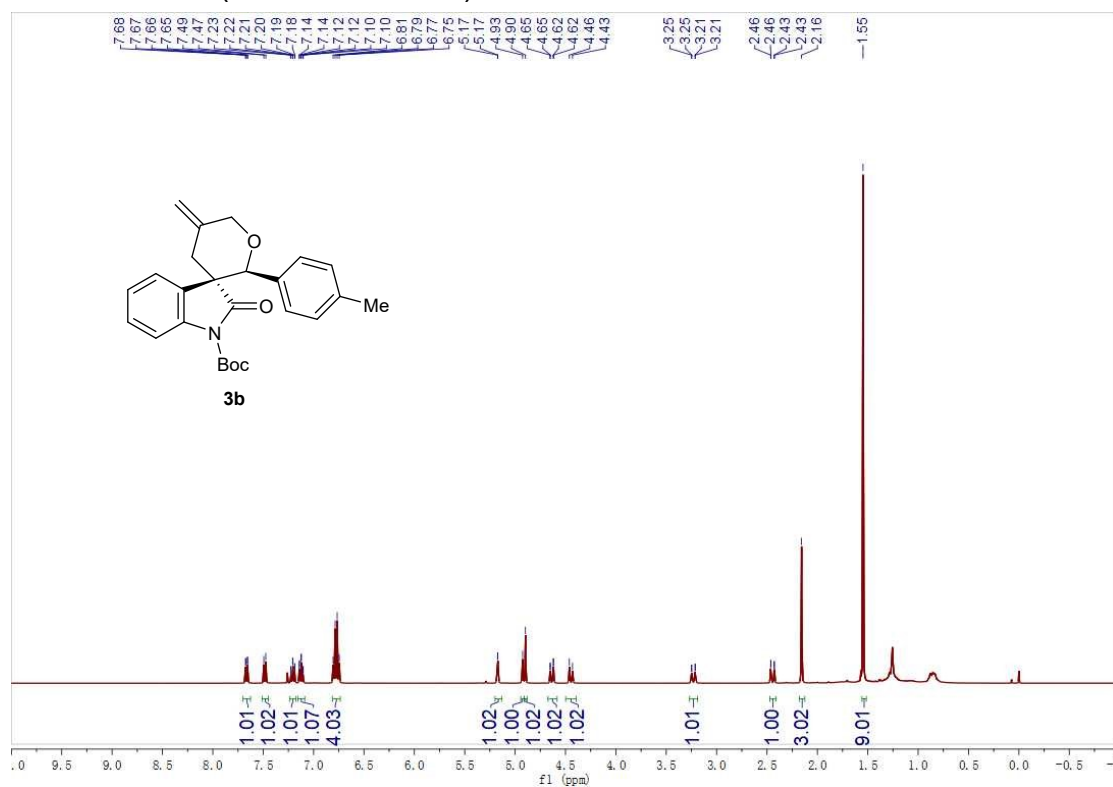

$^{13}\text{C}$  { $^1\text{H}$ } NMR of **3b** (100 MHz,  $\text{CDCl}_3$ )

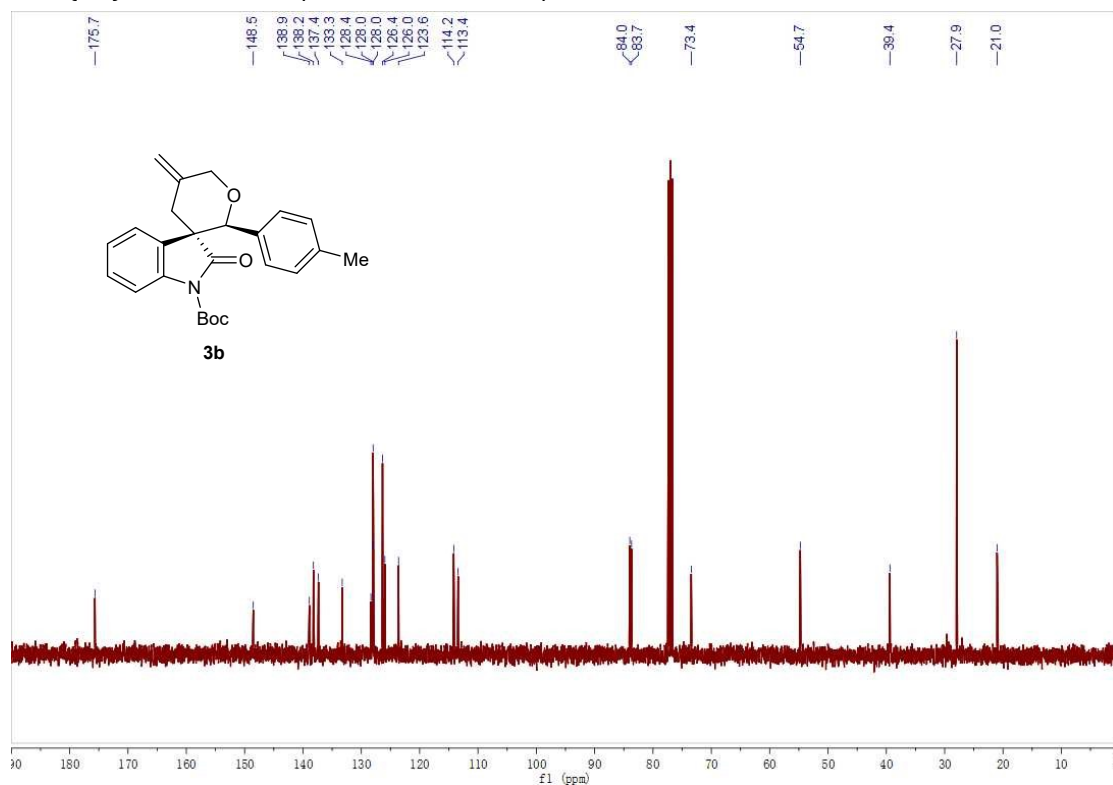

$^1\text{H}$  NMR of **3c** (400 MHz,  $\text{CDCl}_3$ )

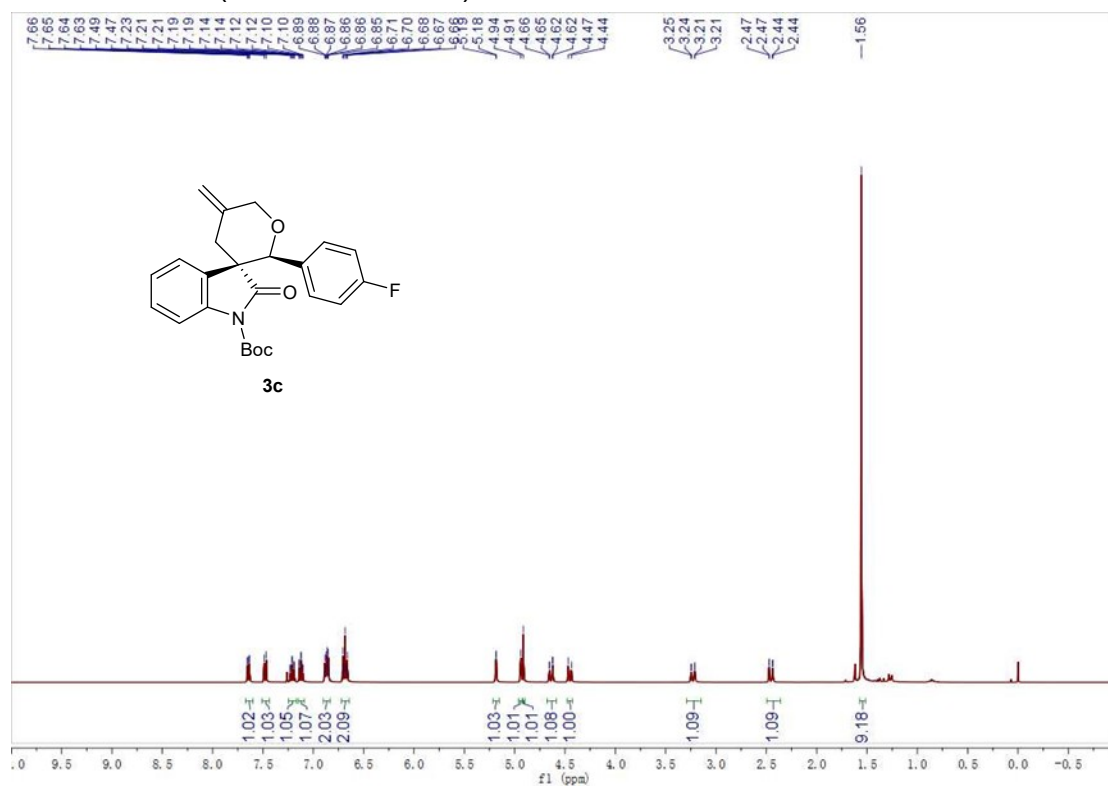

$^{13}\text{C}$  { $^1\text{H}$ } NMR of **3c** (100 MHz,  $\text{CDCl}_3$ )

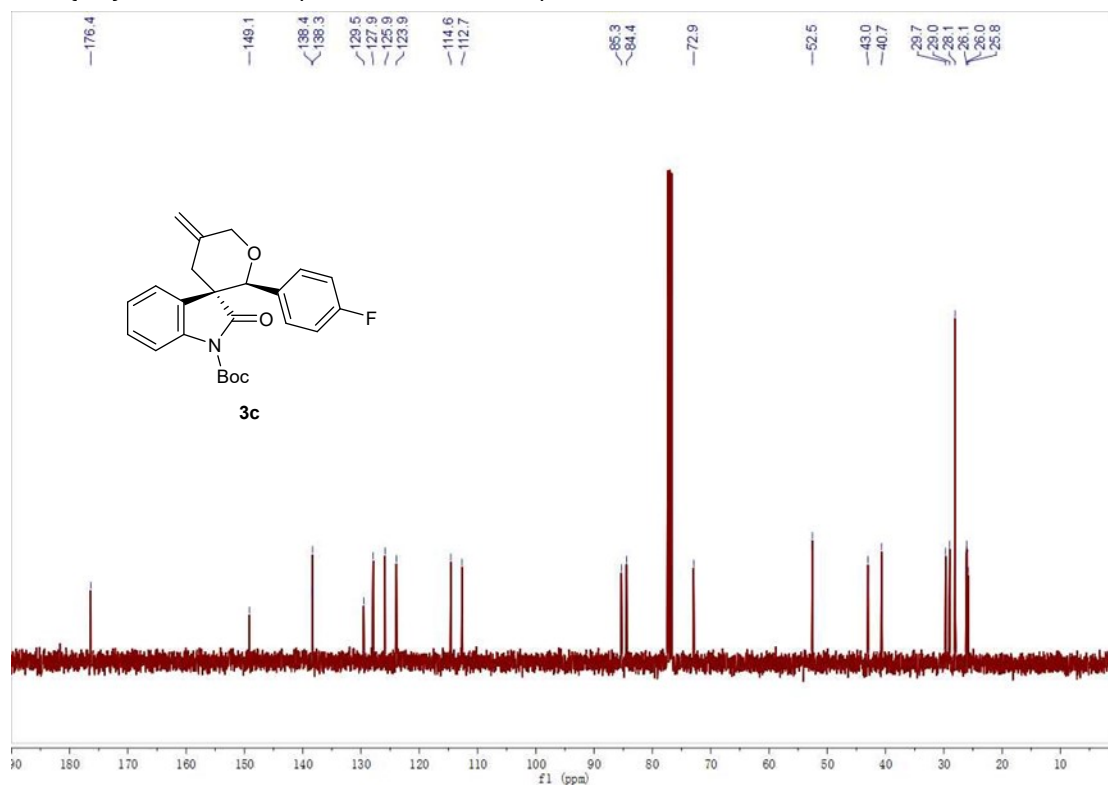

$^{19}\text{F}$  NMR of **3c** (376 MHz,  $\text{CDCl}_3$ )

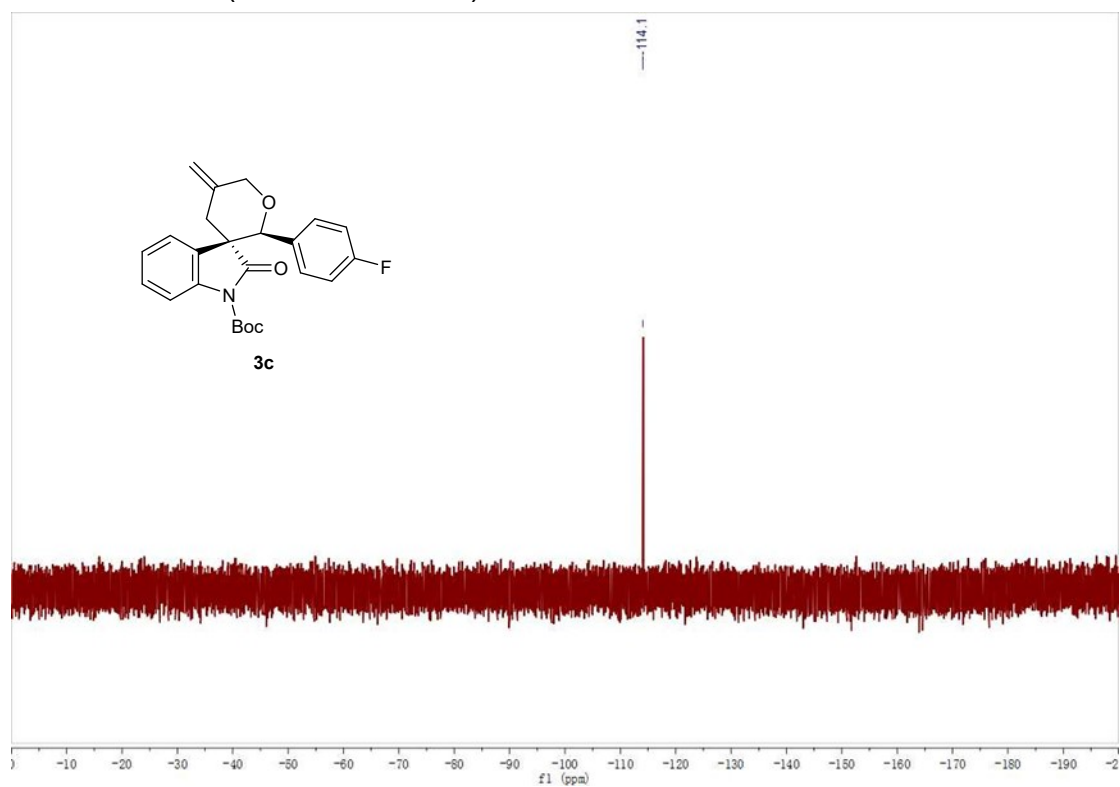

$^1\text{H}$  NMR of **3d** (400 MHz,  $\text{CDCl}_3$ )

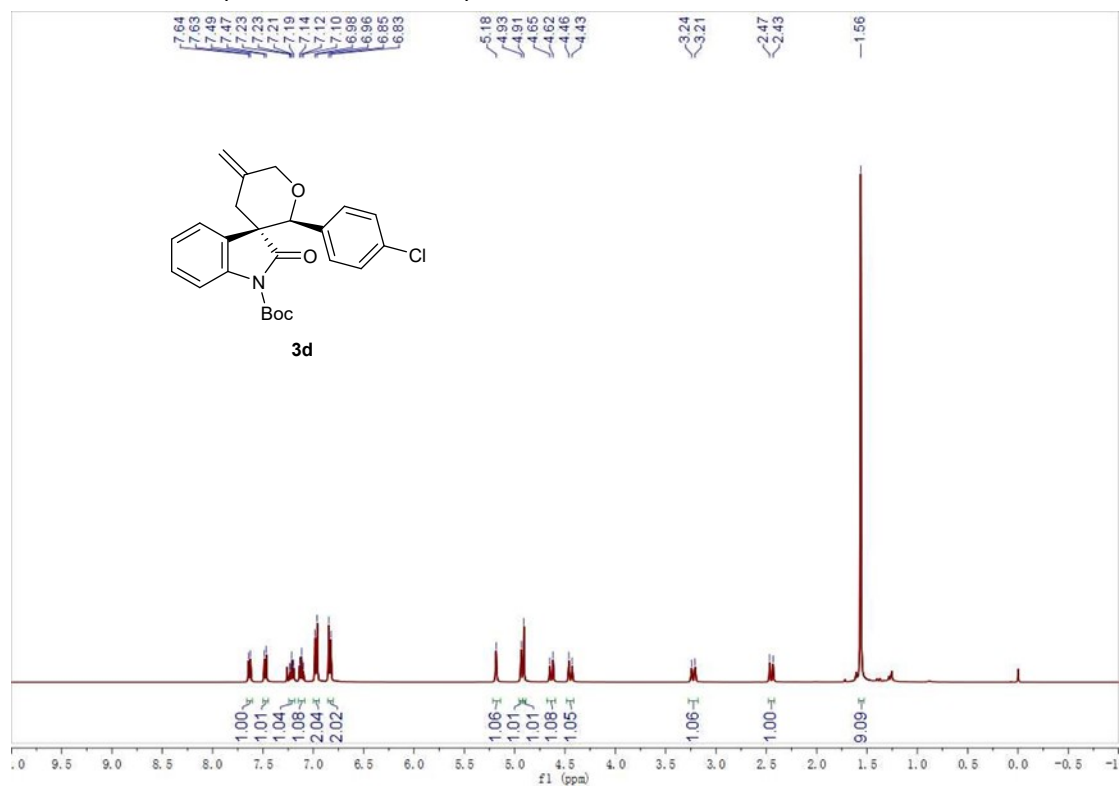

$^{13}\text{C}$   $\{^1\text{H}\}$  NMR of **3d** (100 MHz,  $\text{CDCl}_3$ )

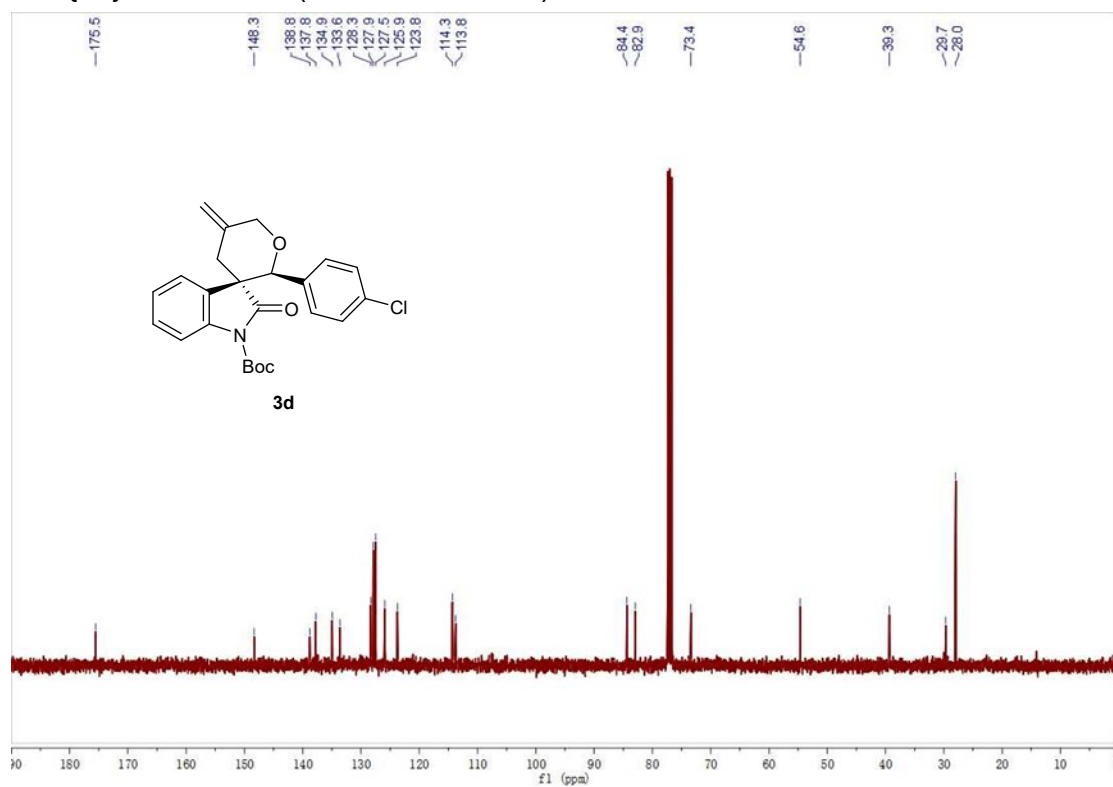

$^1\text{H}$  NMR of **3e** (400 MHz,  $\text{CDCl}_3$ )

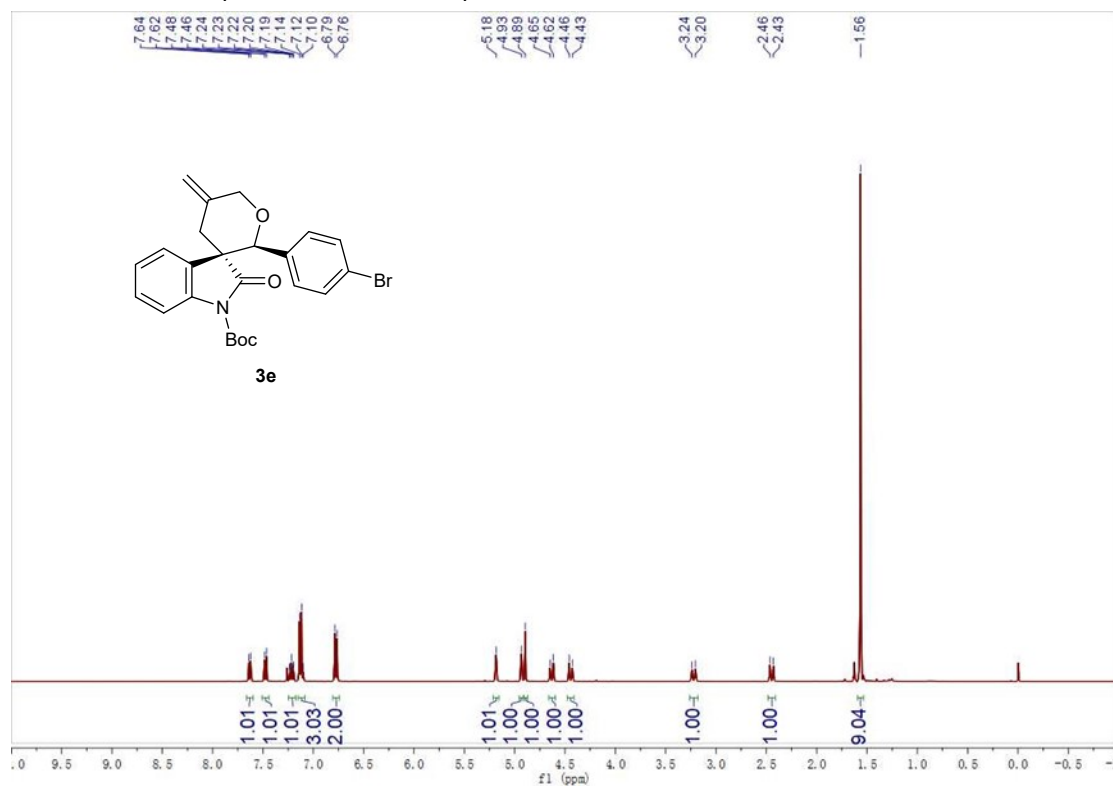

$^{13}\text{C}$   $\{^1\text{H}\}$  NMR of **3e** (100 MHz,  $\text{CDCl}_3$ )

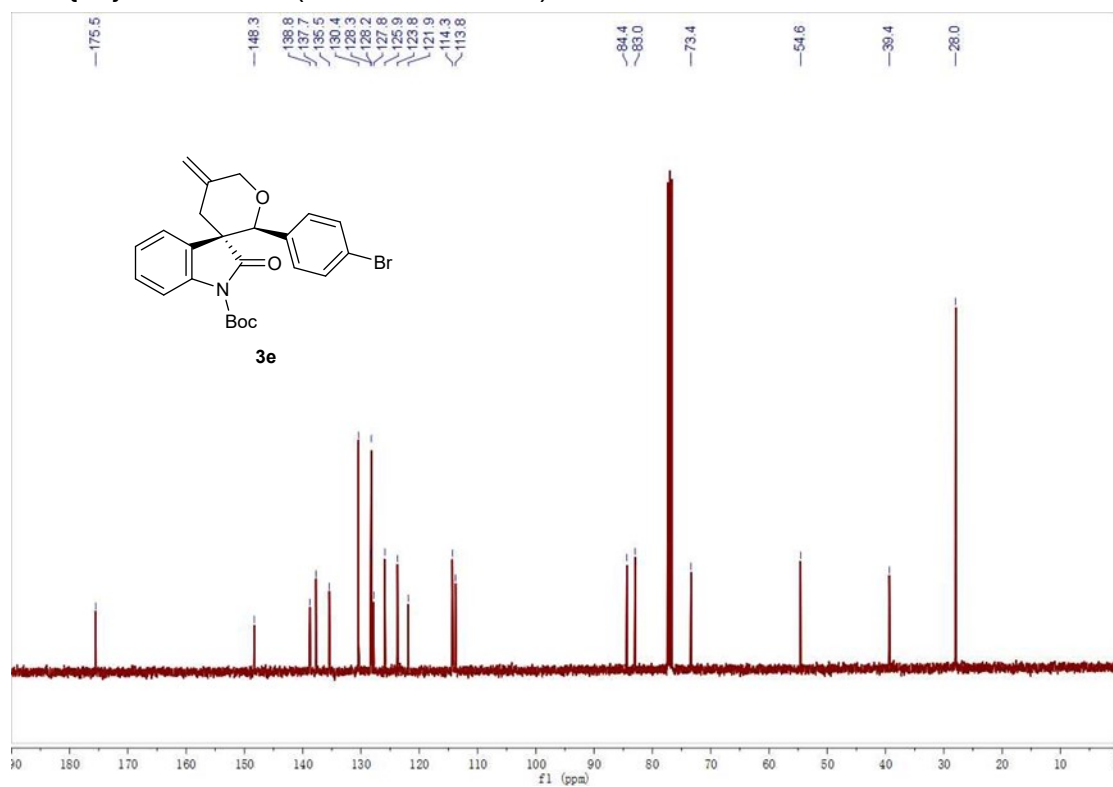

$^1\text{H}$  NMR of **3f** (400 MHz,  $\text{CDCl}_3$ )

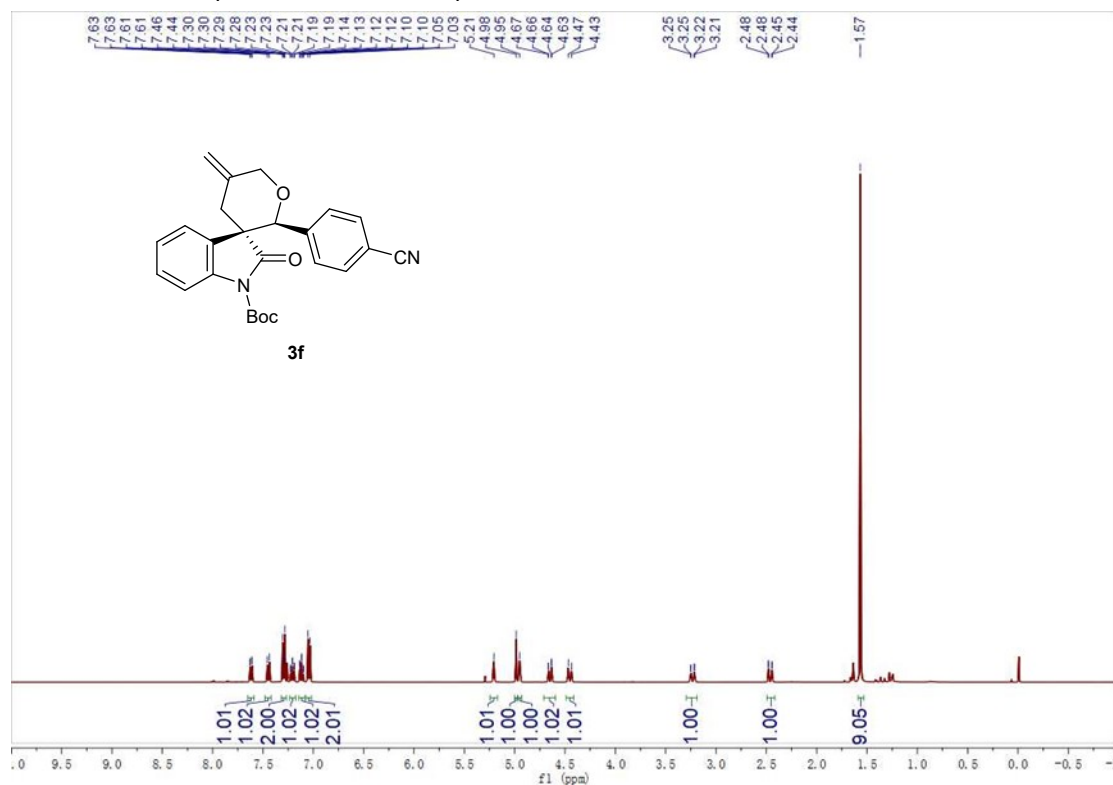



$^{13}\text{C}$   $\{^1\text{H}\}$  NMR of **3f** (100 MHz,  $\text{CDCl}_3$ )

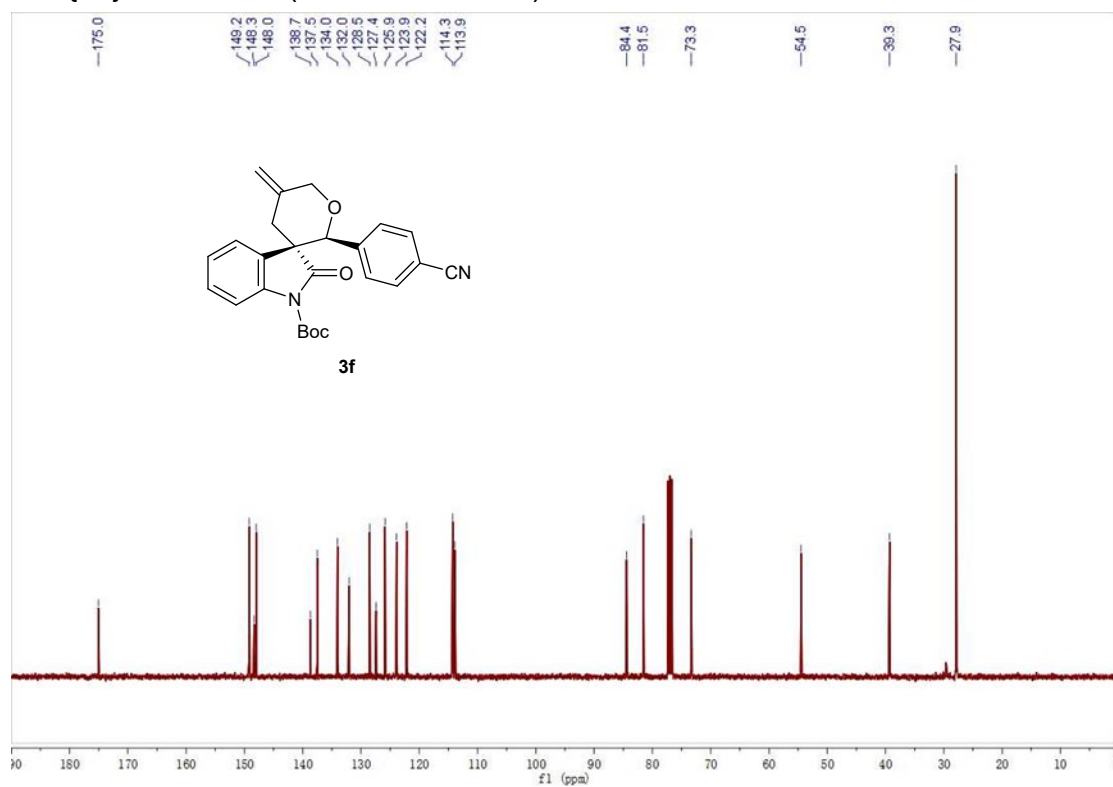

$^1\text{H}$  NMR of **3g** (400 MHz,  $\text{CDCl}_3$ )

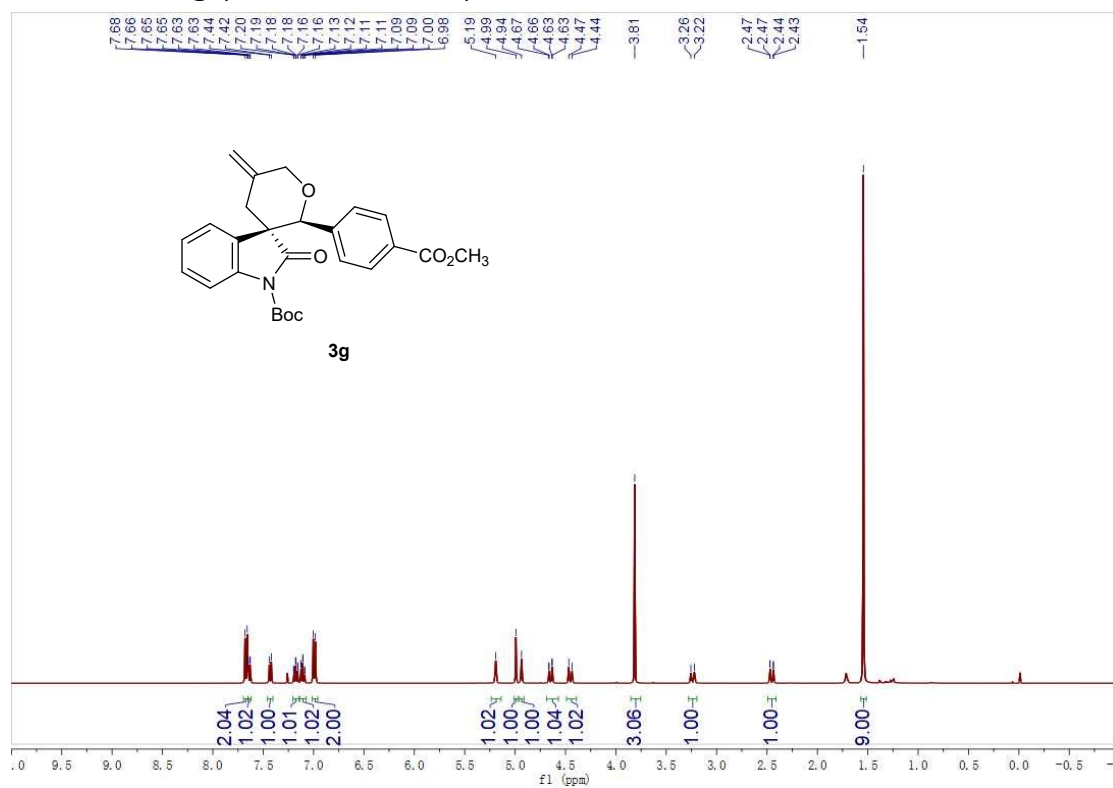

$^{13}\text{C}$   $\{^1\text{H}\}$  NMR of **3g** (100 MHz,  $\text{CDCl}_3$ )

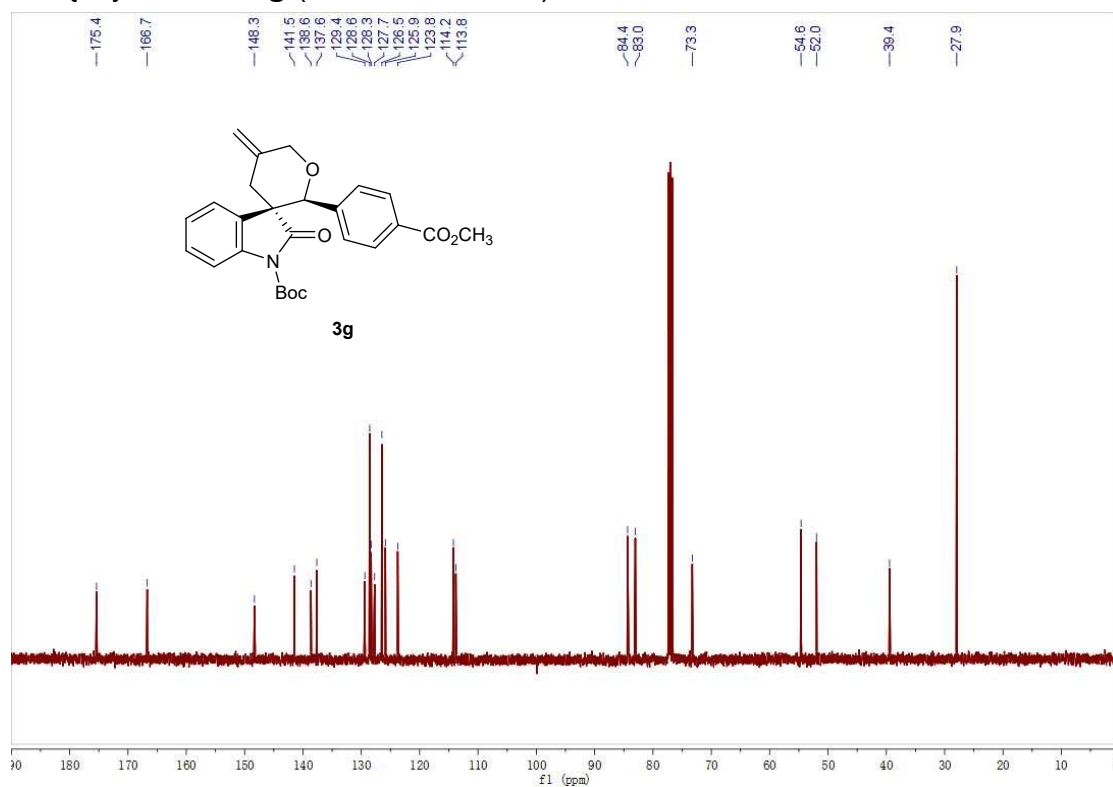

$^1\text{H}$  NMR of **3h** (400 MHz,  $\text{CDCl}_3$ )

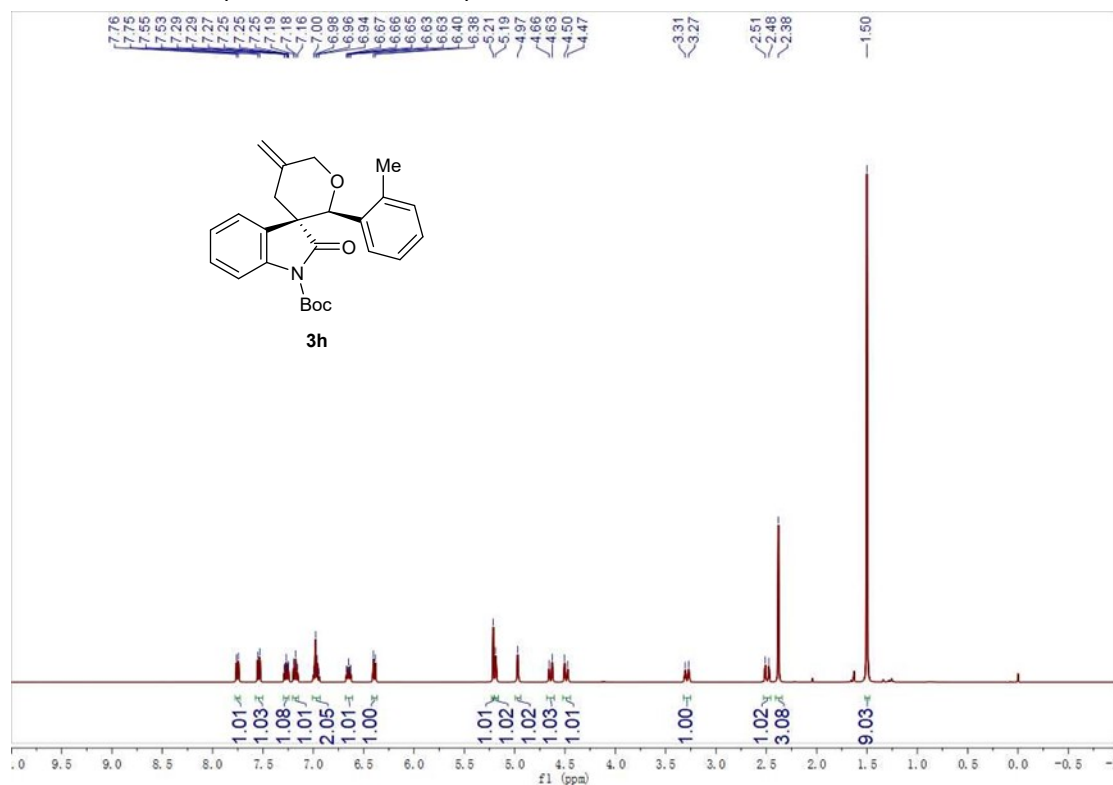

$^{13}\text{C}$   $\{^1\text{H}\}$  NMR of **3h** (100 MHz,  $\text{CDCl}_3$ )

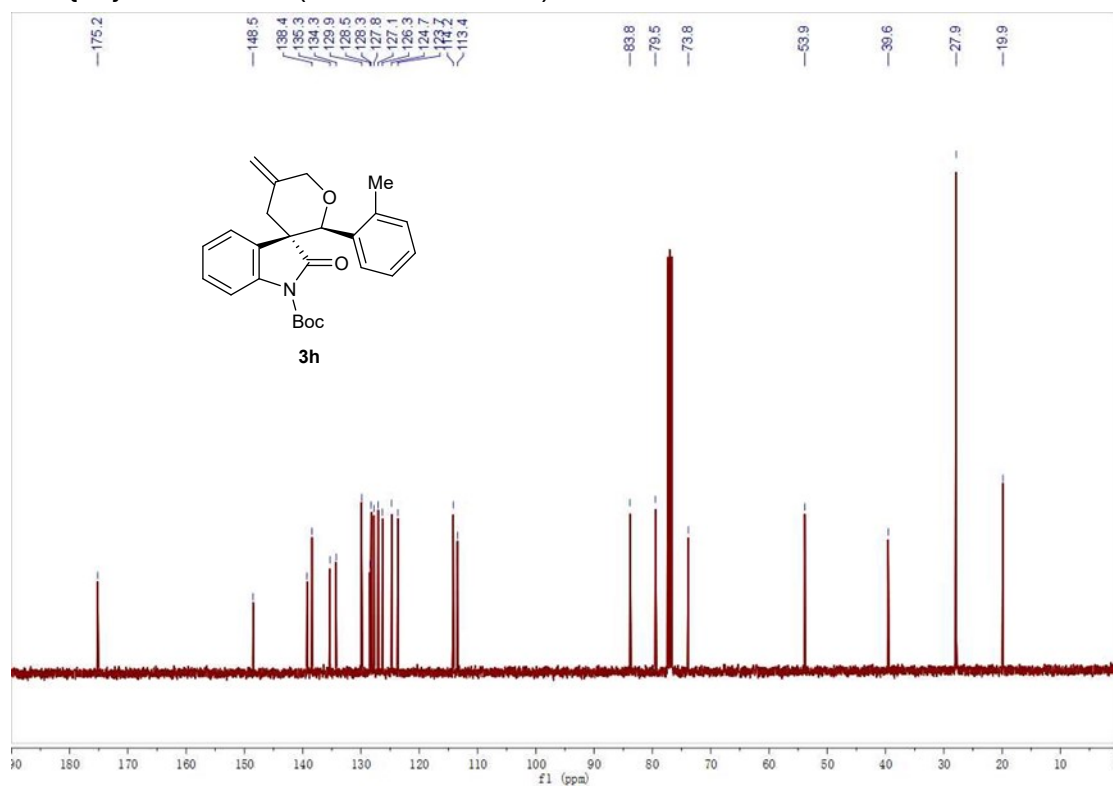

$^1\text{H}$  NMR of **3i** (400 MHz,  $\text{CDCl}_3$ )

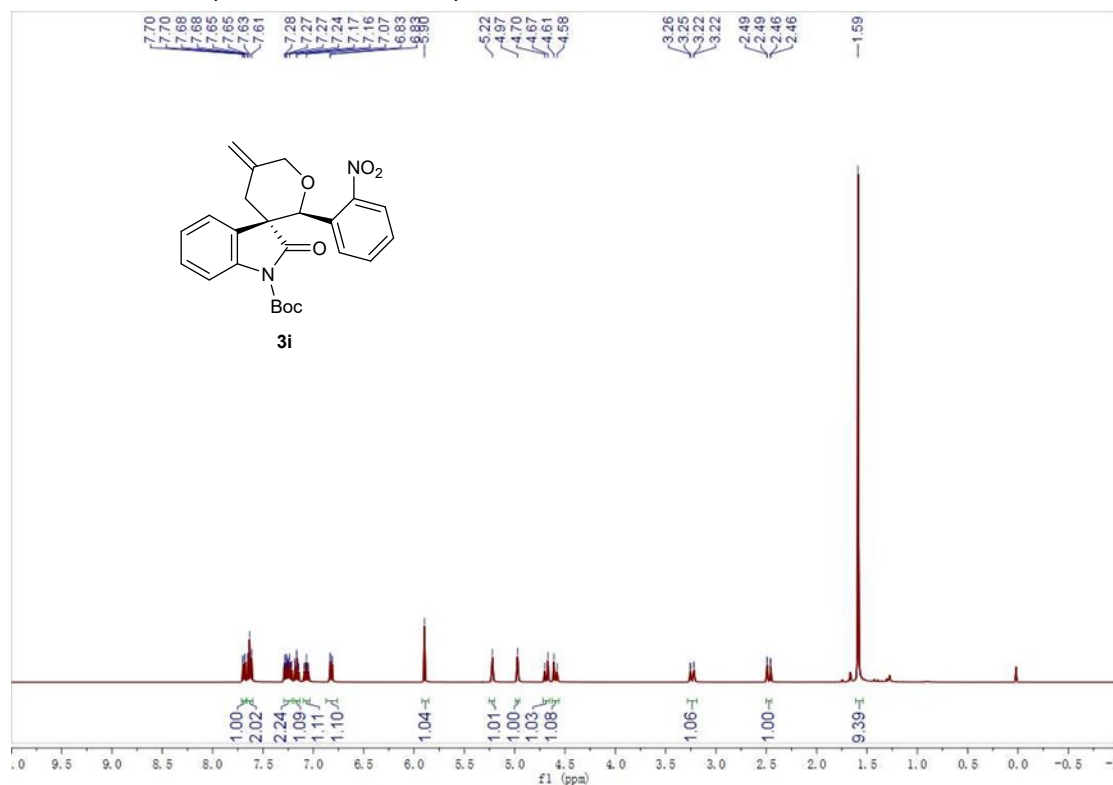

$^{13}\text{C}$   $\{^1\text{H}\}$  NMR of **3i** (100 MHz,  $\text{CDCl}_3$ )

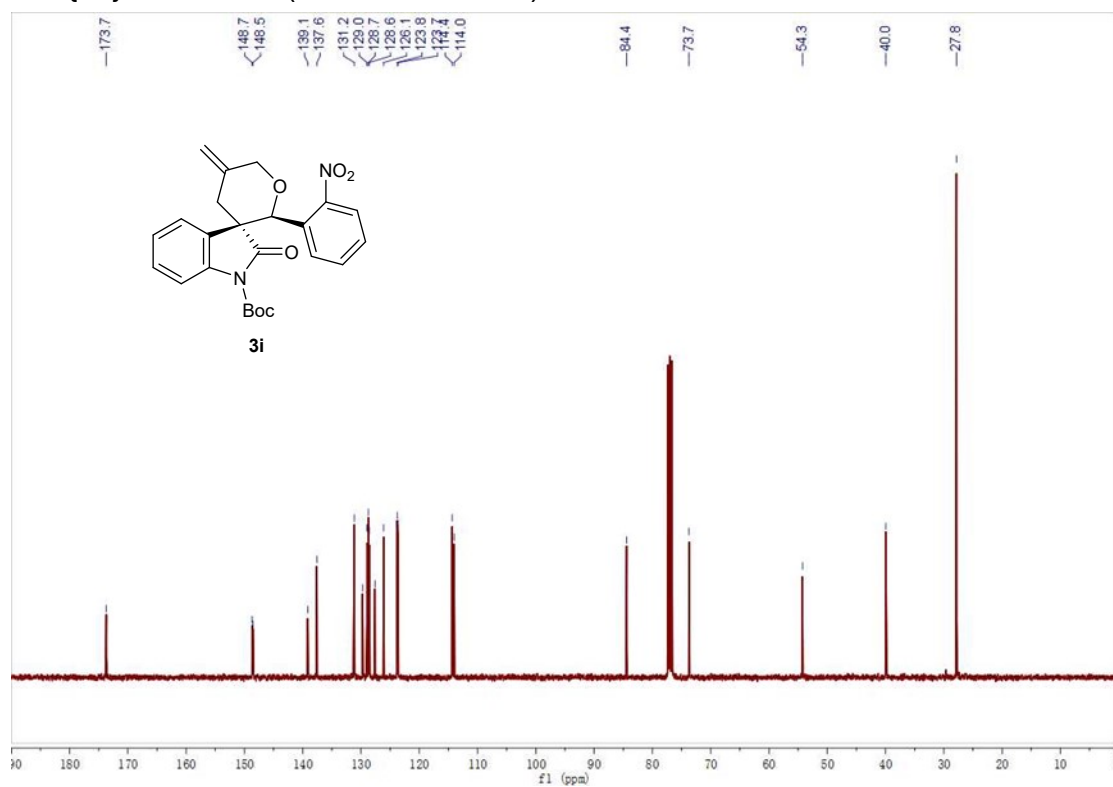

$^1\text{H}$  NMR of **3j** (400 MHz,  $\text{CDCl}_3$ )

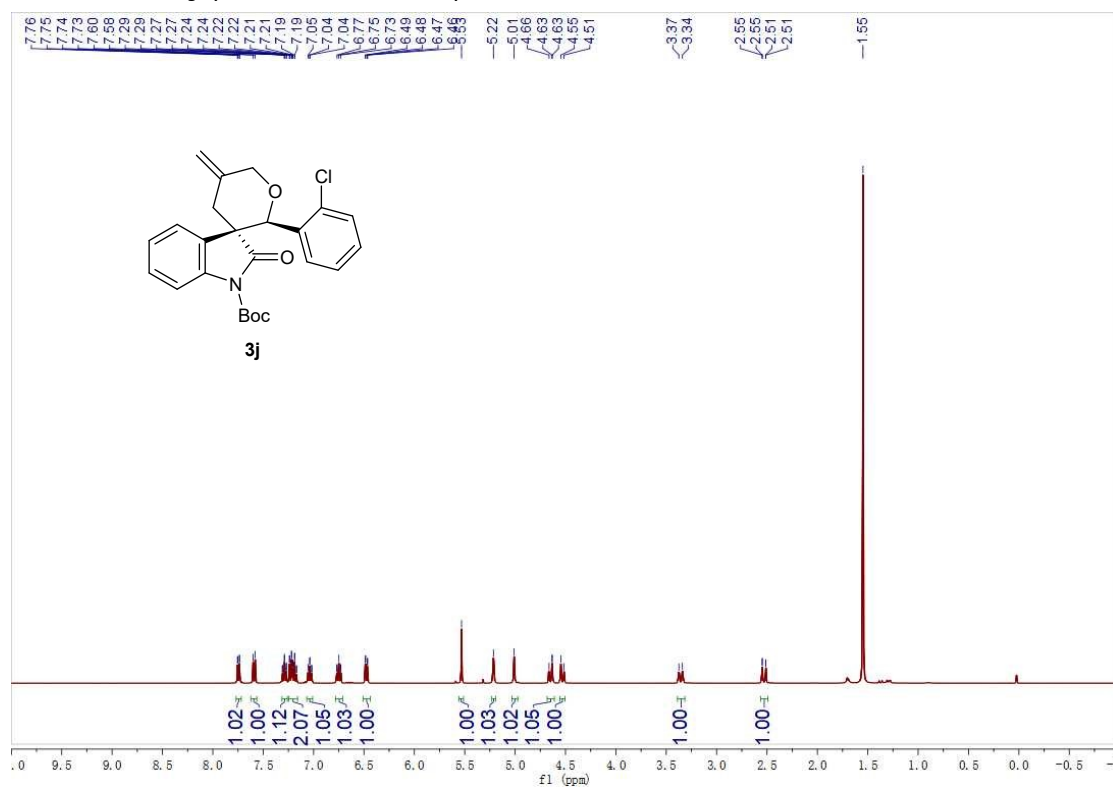

$^{13}\text{C}$   $\{^1\text{H}\}$  NMR of **3j** (100 MHz,  $\text{CDCl}_3$ )

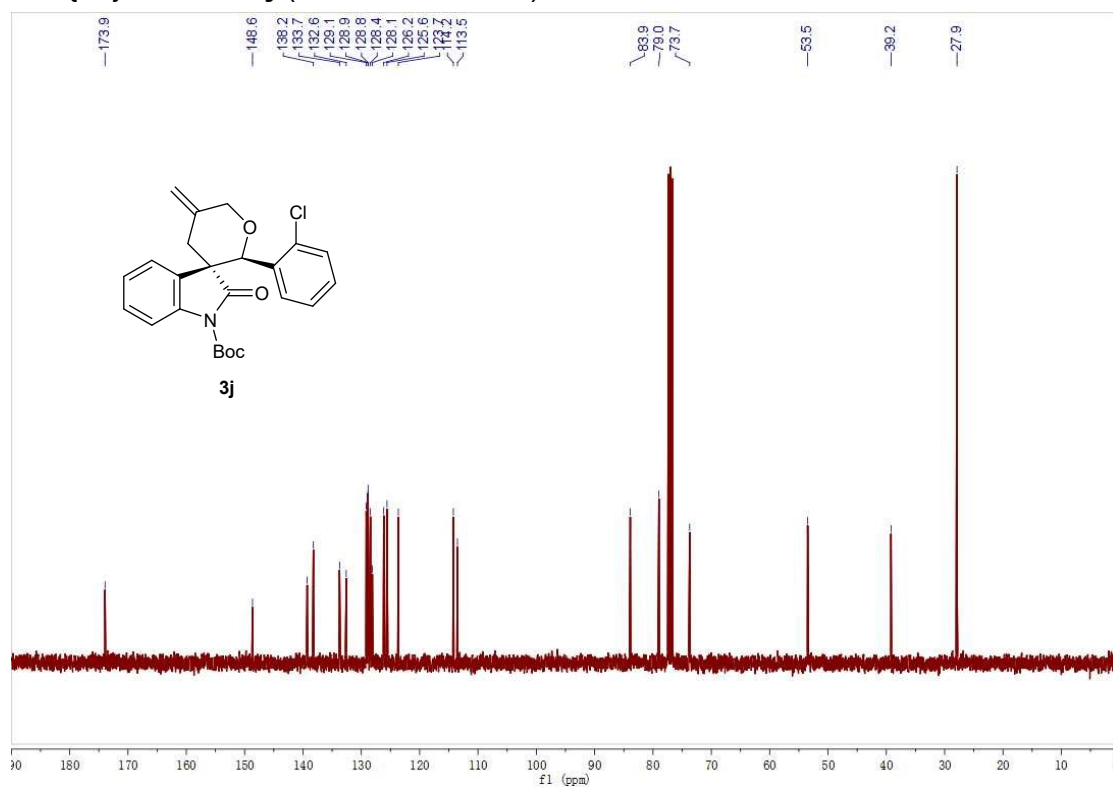

$^1\text{H}$  NMR of **3k** (400 MHz,  $\text{CDCl}_3$ )

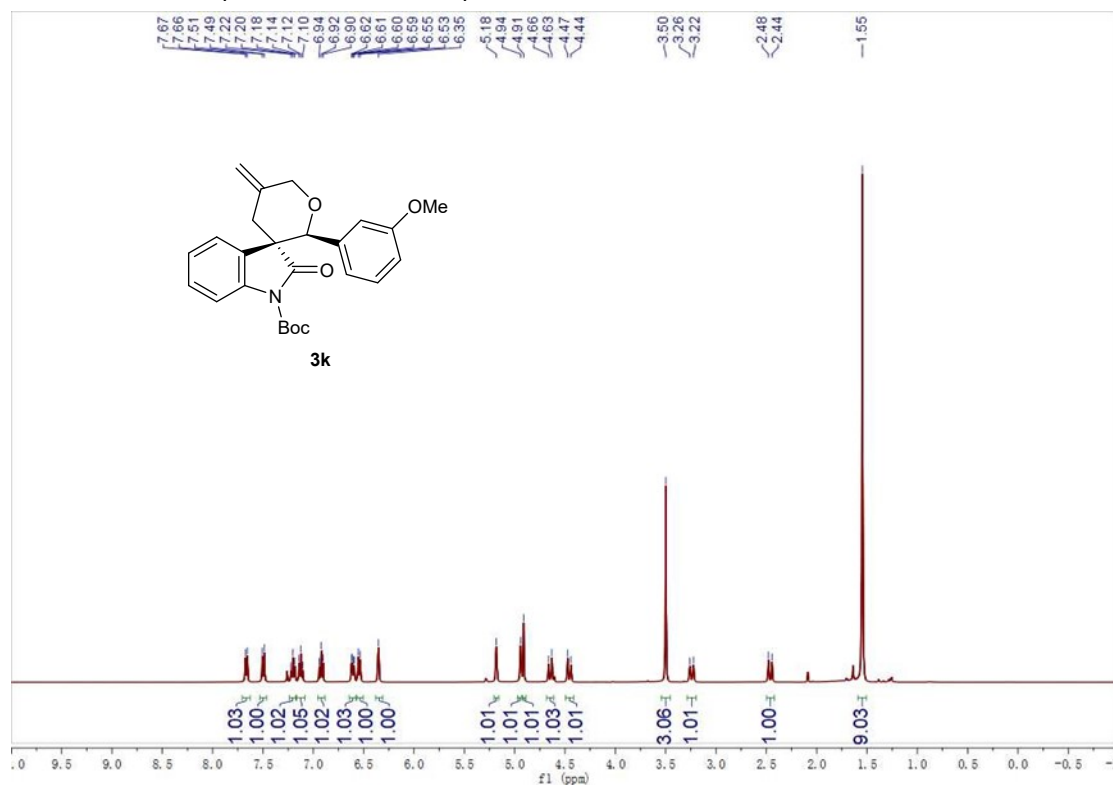

$^{13}\text{C}$   $\{^1\text{H}\}$  NMR of **3k** (100 MHz,  $\text{CDCl}_3$ )

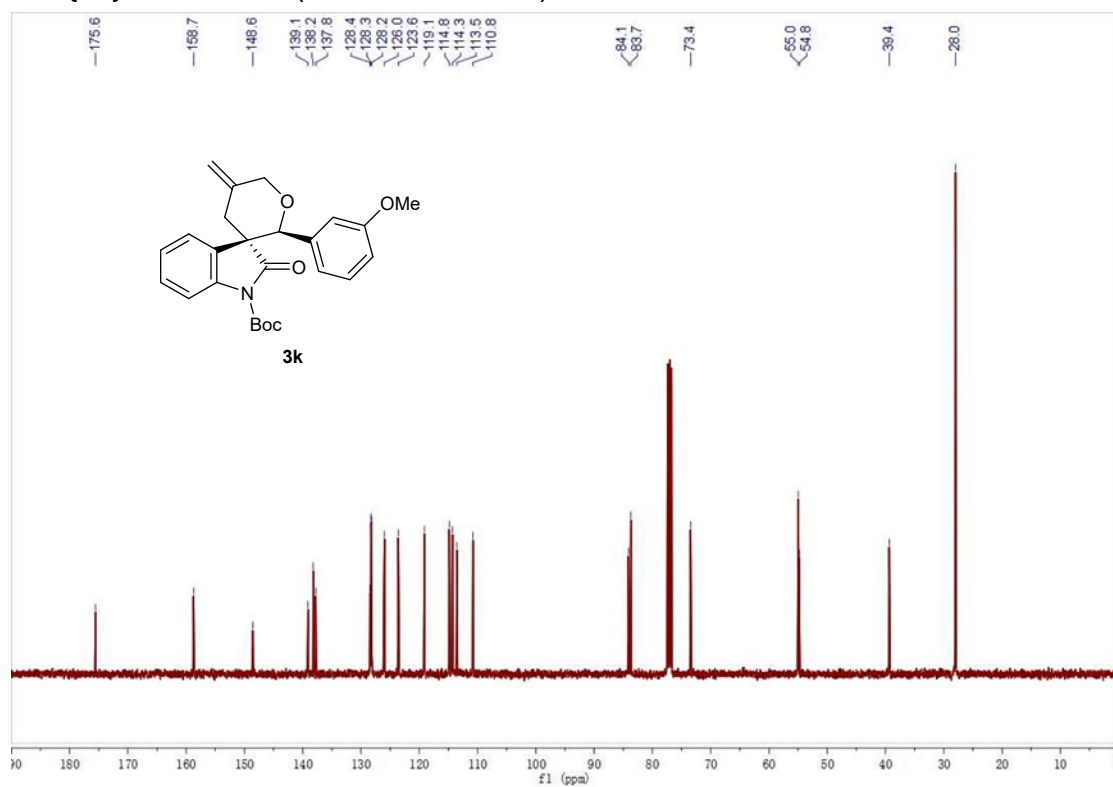

$^1\text{H}$  NMR of **3l** (400 MHz,  $\text{CDCl}_3$ )

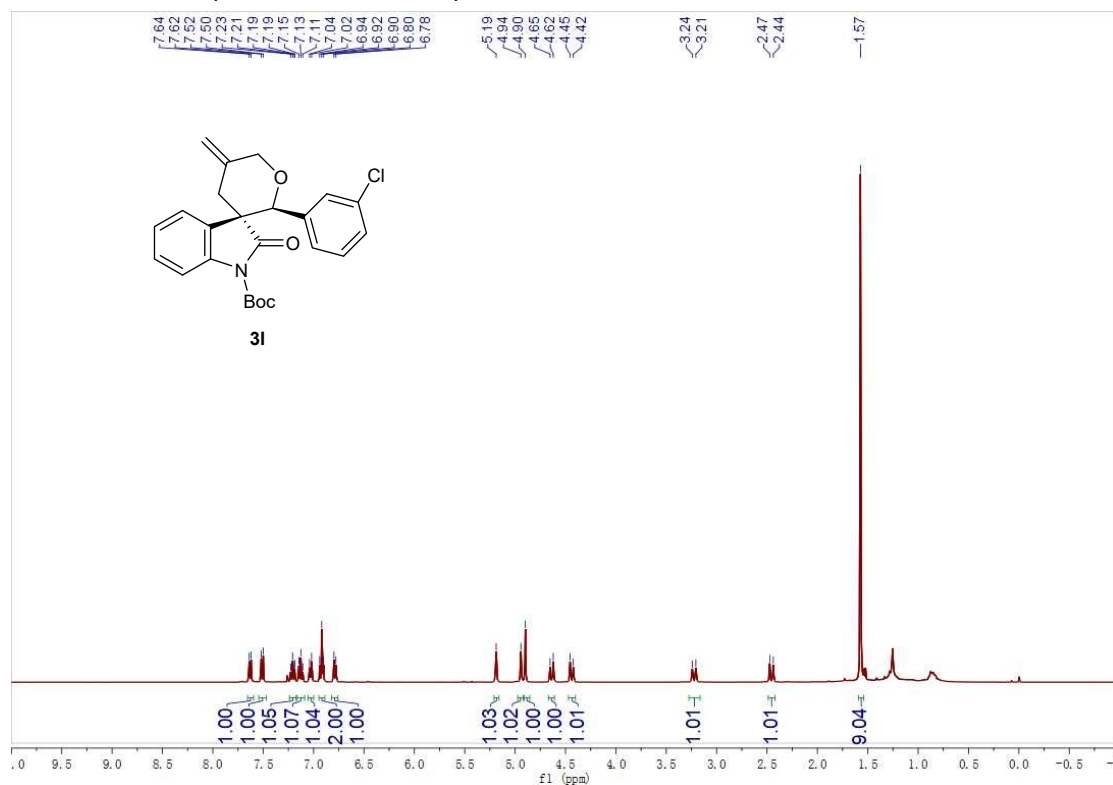

$^{13}\text{C}$   $\{^1\text{H}\}$  NMR of **3I** (100 MHz,  $\text{CDCl}_3$ )

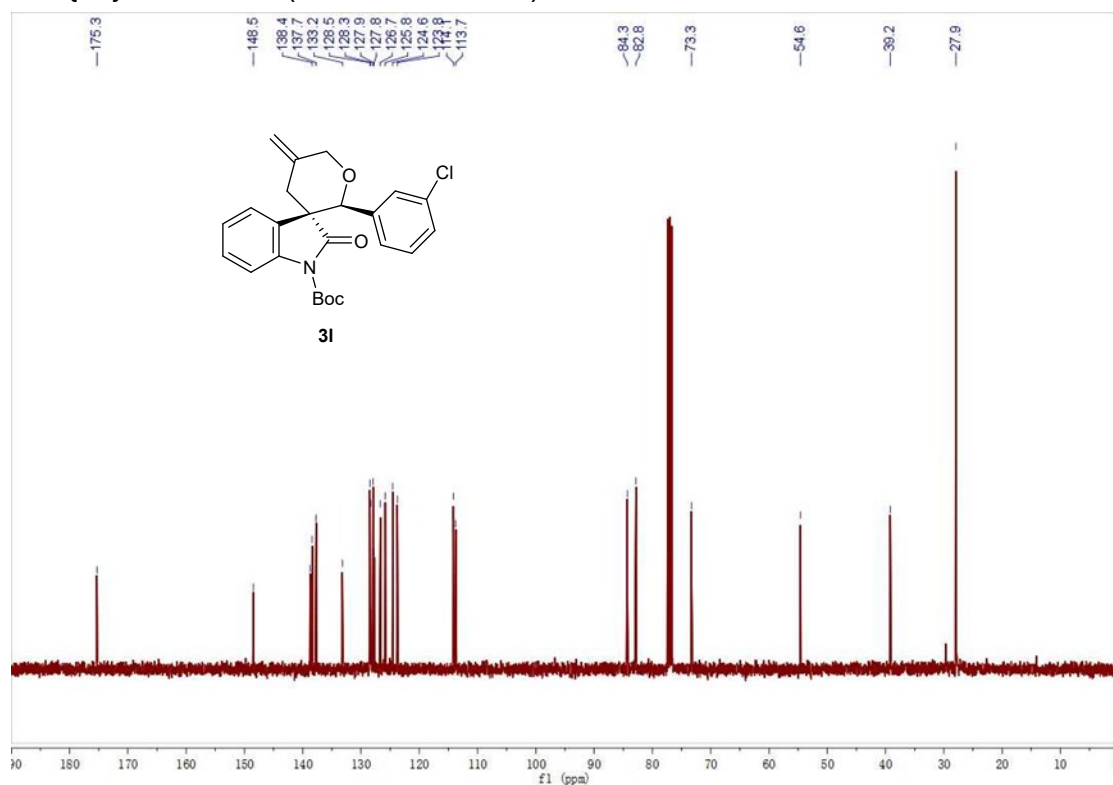

$^1\text{H}$  NMR of **3m** (400 MHz,  $\text{CDCl}_3$ )

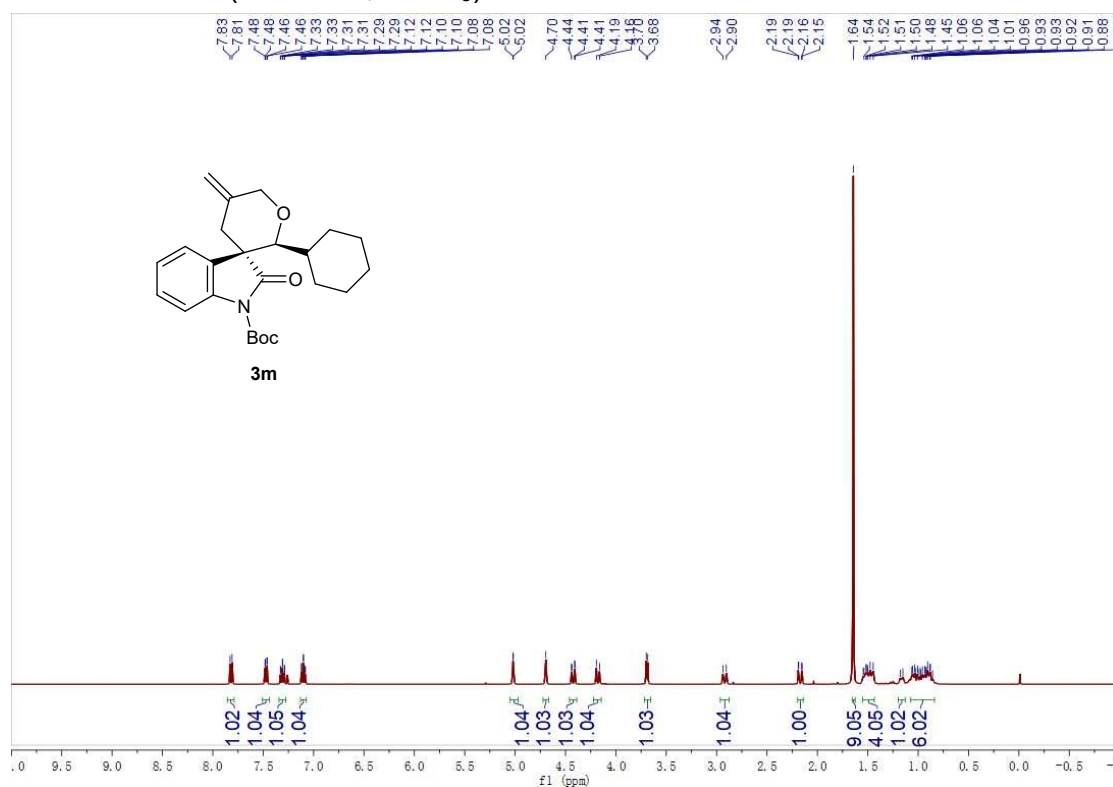

$^{13}\text{C}$   $\{^1\text{H}\}$  NMR of **3m** (100 MHz,  $\text{CDCl}_3$ )

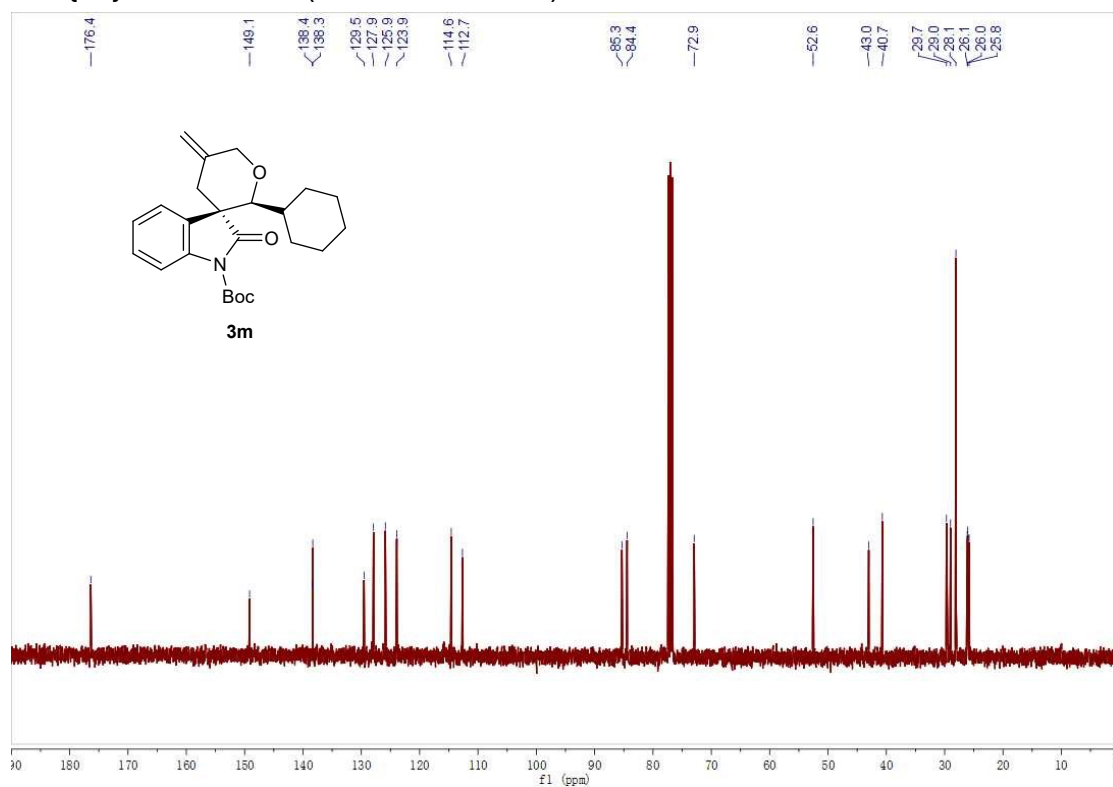

$^1\text{H}$  NMR of **3n** (400 MHz,  $\text{CDCl}_3$ )

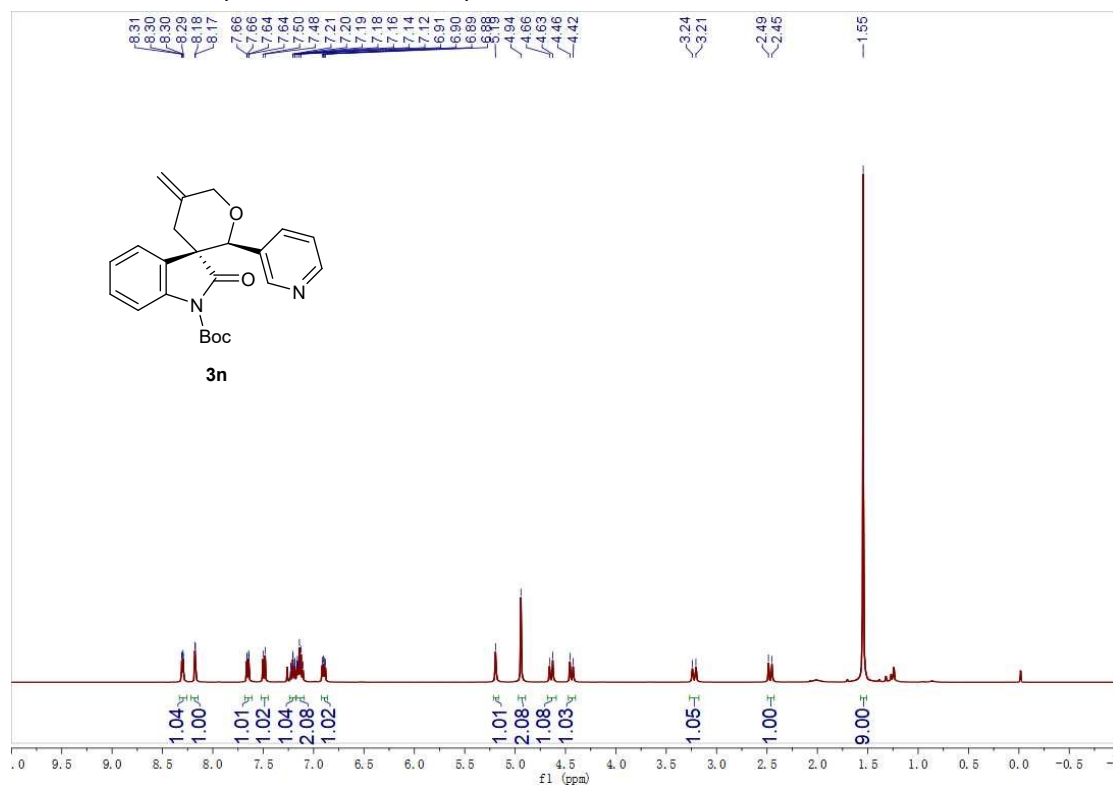



$^{13}\text{C}$   $\{^1\text{H}\}$  NMR of **3n** (100 MHz,  $\text{CDCl}_3$ )

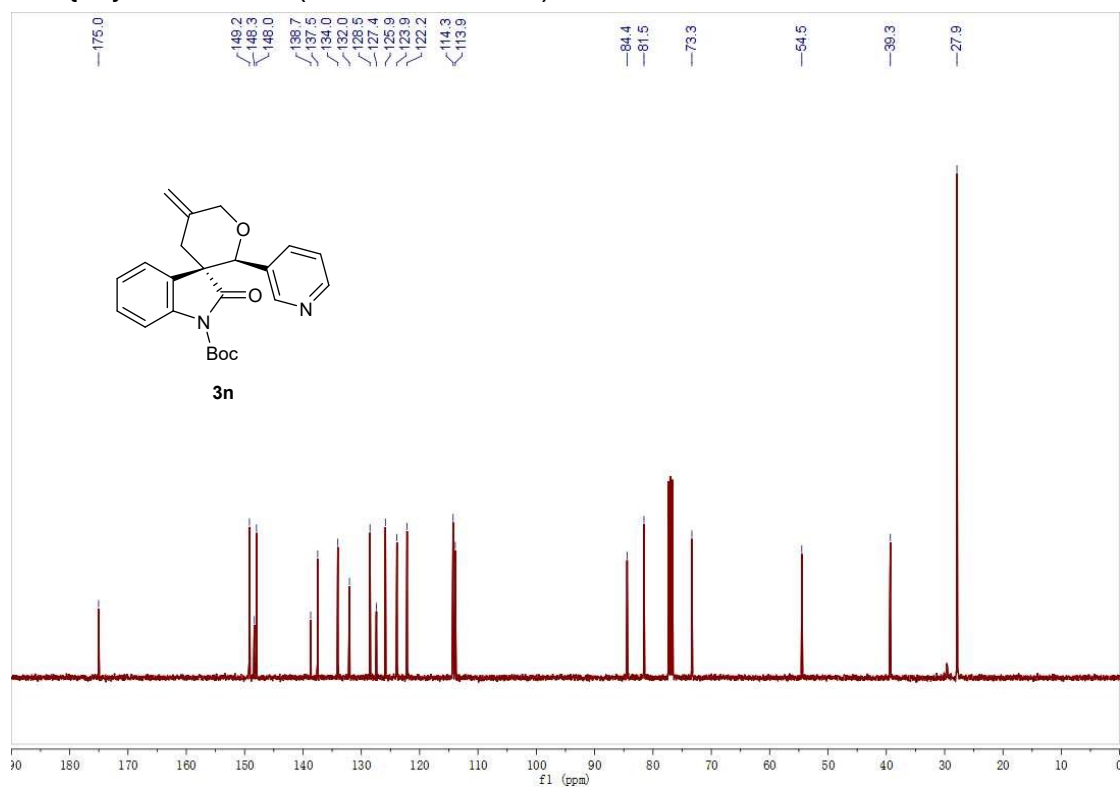

$^1\text{H}$  NMR of **3o** (400 MHz,  $\text{CDCl}_3$ )

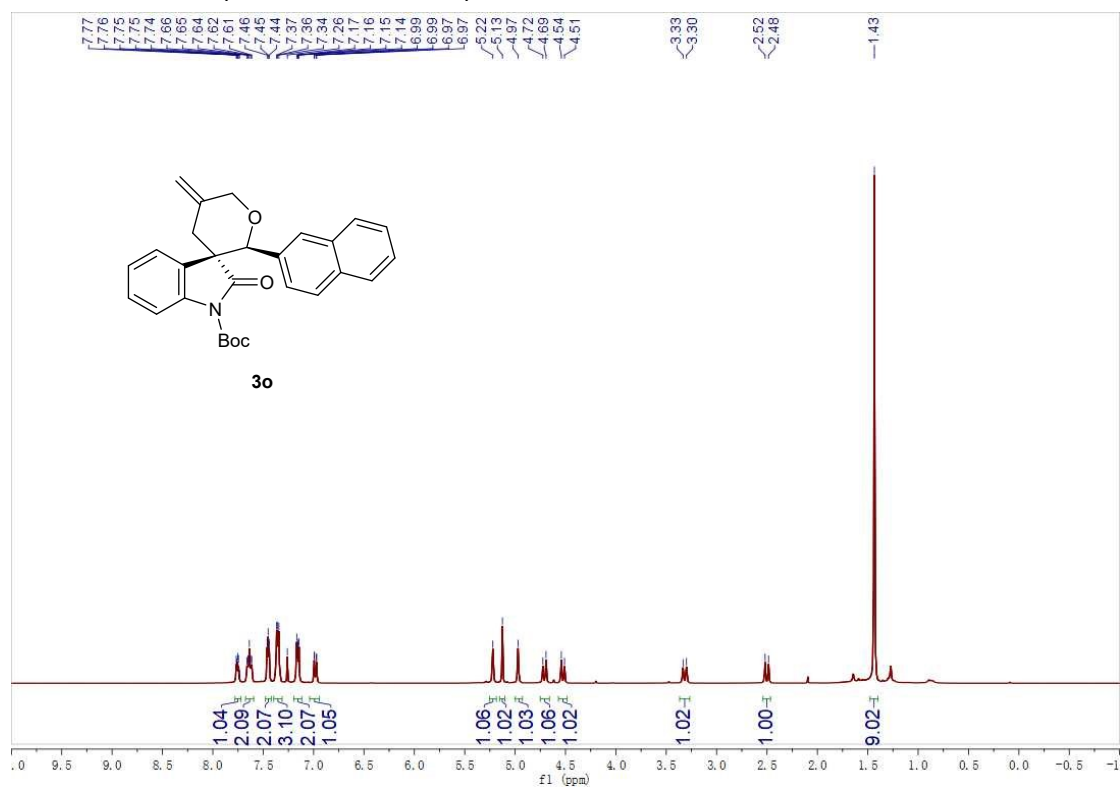

$^{13}\text{C}$   $\{^1\text{H}\}$  NMR of **3o** (100 MHz,  $\text{CDCl}_3$ )

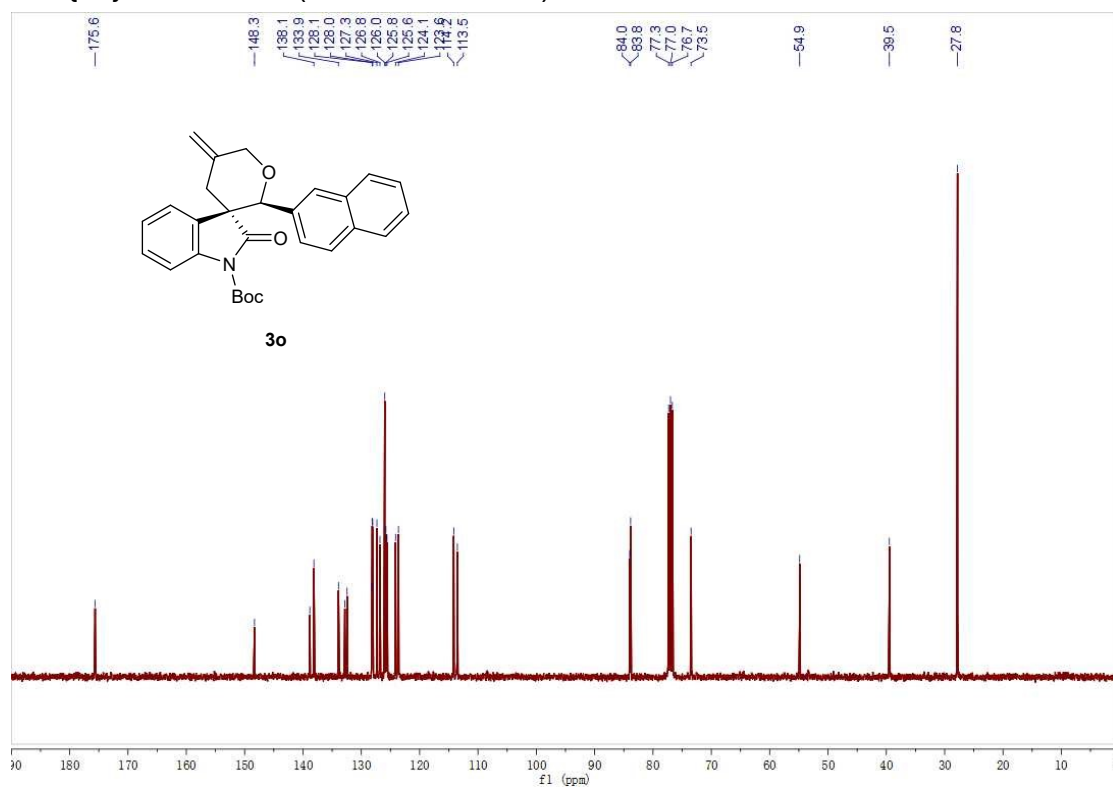

$^1\text{H}$  NMR of **3p** (400 MHz,  $\text{CDCl}_3$ )

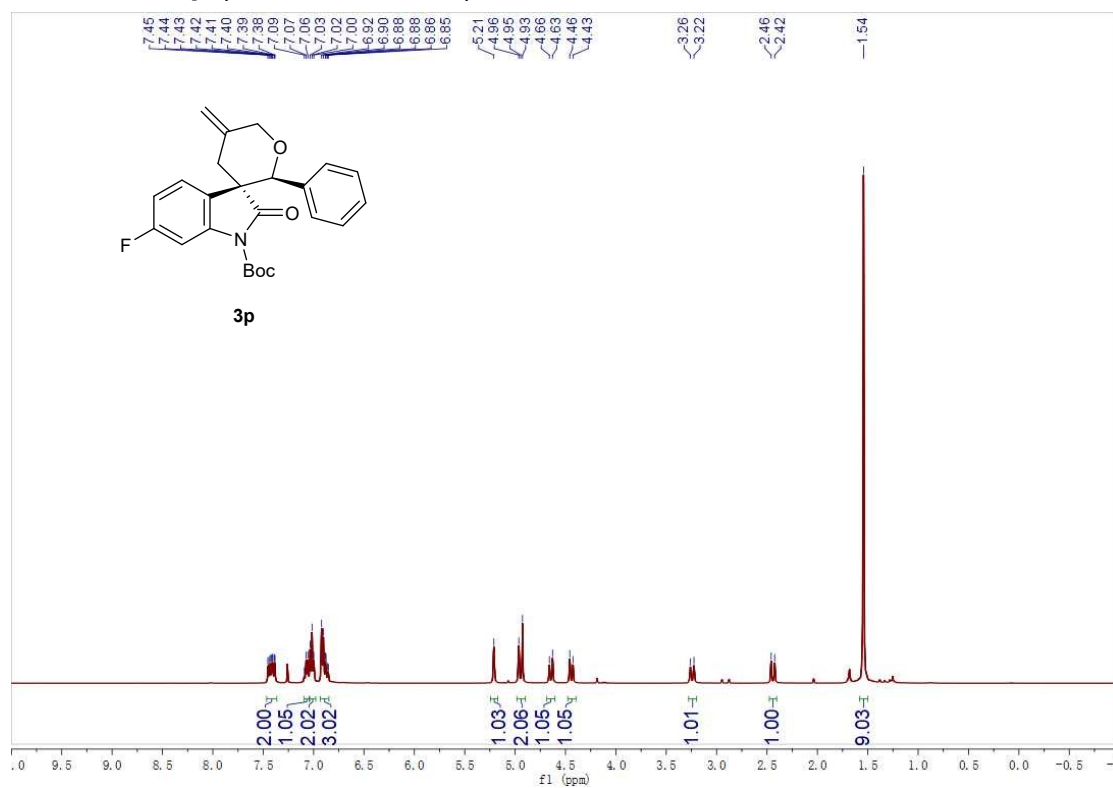

$^{13}\text{C}$   $\{^1\text{H}\}$  NMR of **3p** (100 MHz,  $\text{CDCl}_3$ )

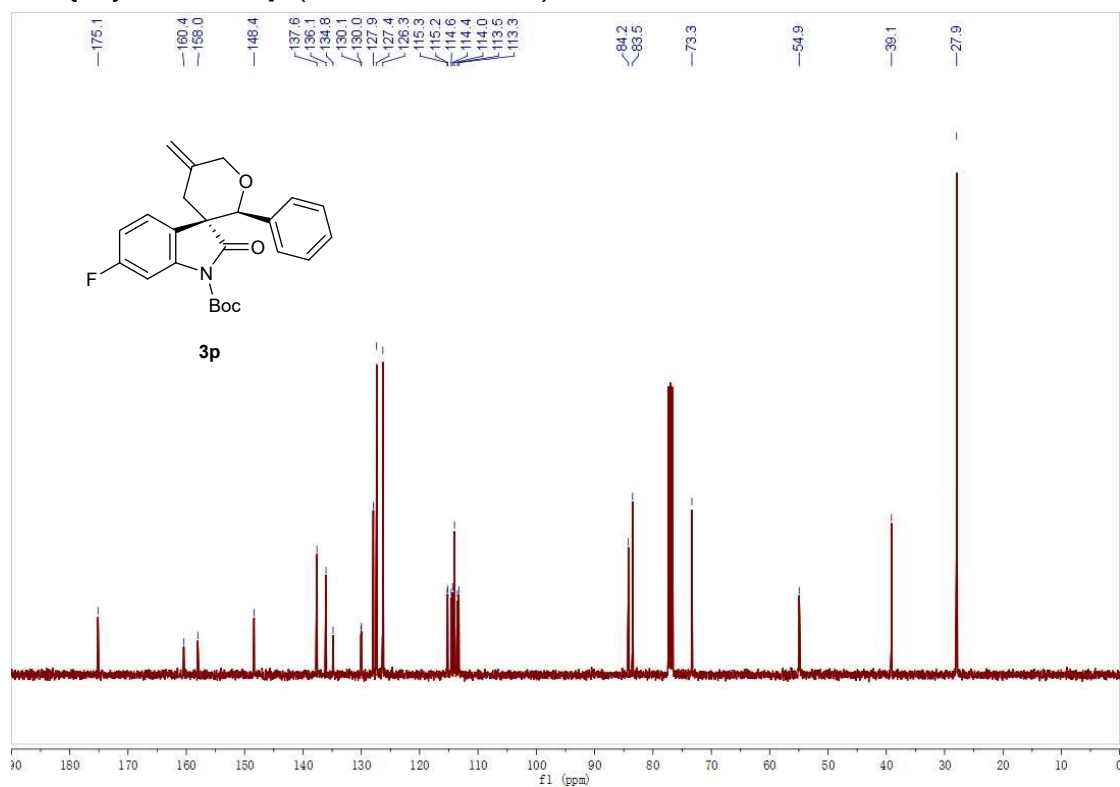

$^{19}\text{F}$  NMR of **3p** (376 MHz,  $\text{CDCl}_3$ )

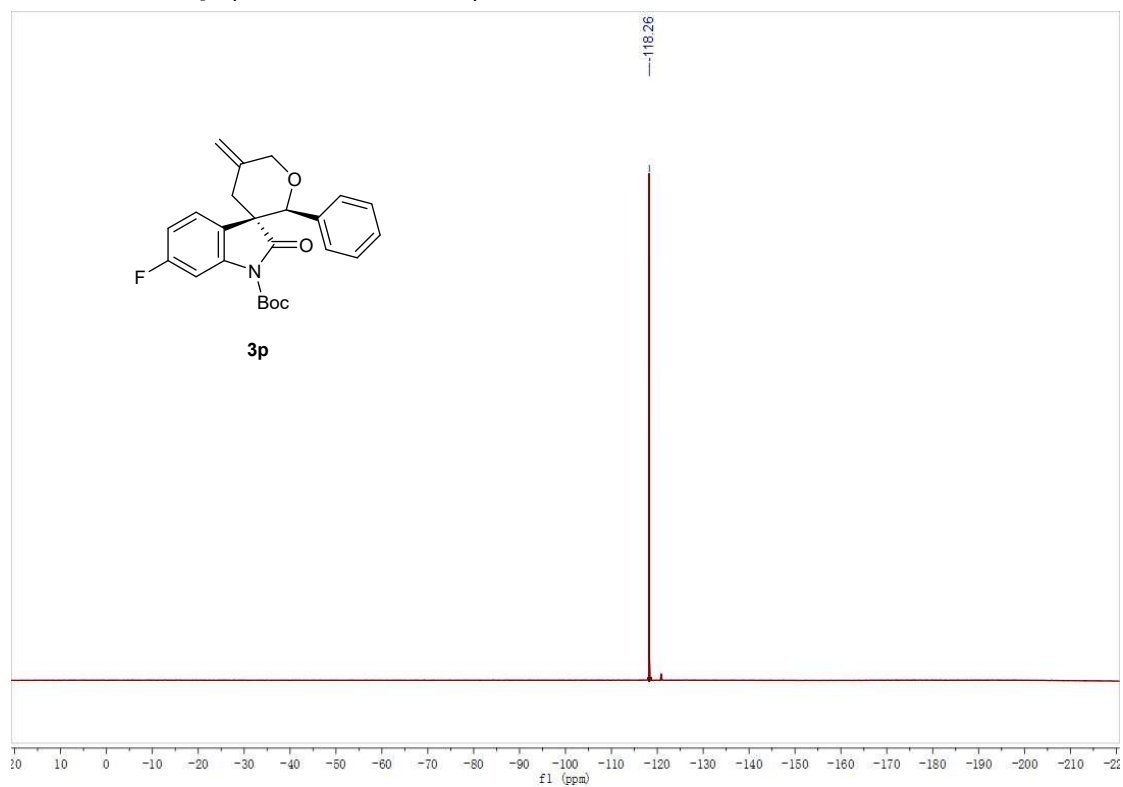

$^1\text{H}$  NMR of **3q** (400 MHz,  $\text{CDCl}_3$ )

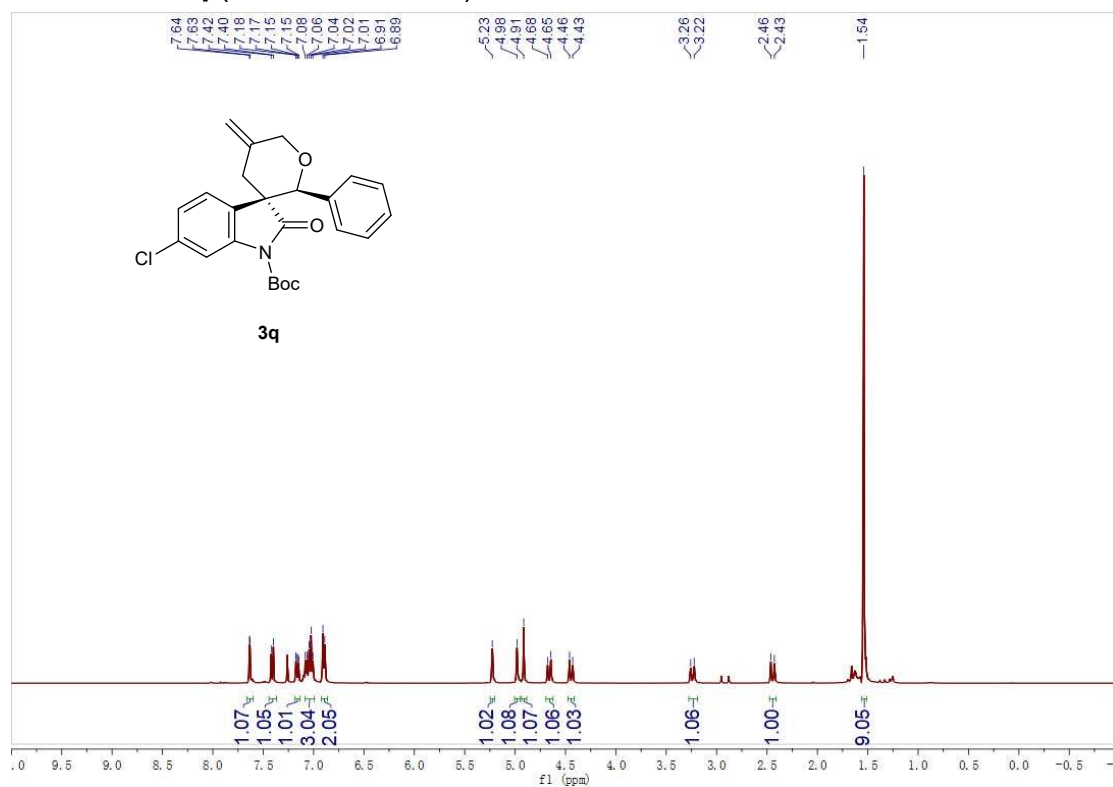

$^{13}\text{C}$   $\{^1\text{H}\}$  NMR of **3q** (100 MHz,  $\text{CDCl}_3$ )

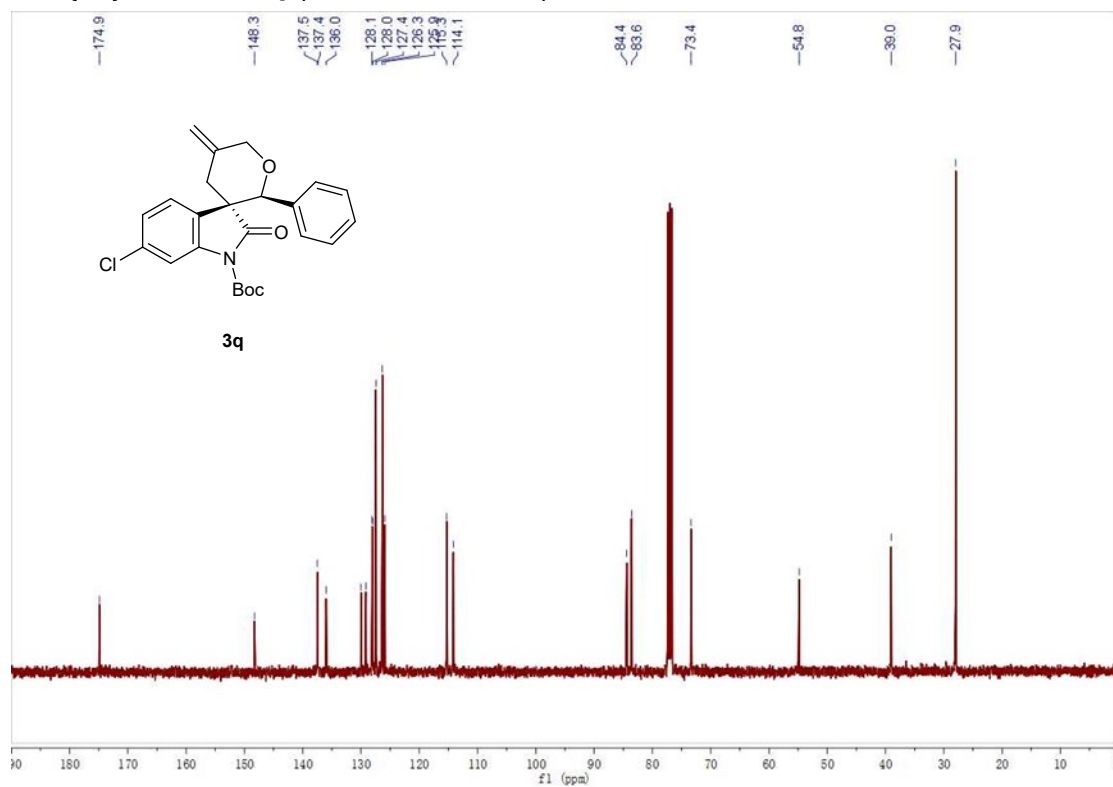

$^1\text{H}$  NMR of **3r** (400 MHz,  $\text{CDCl}_3$ )

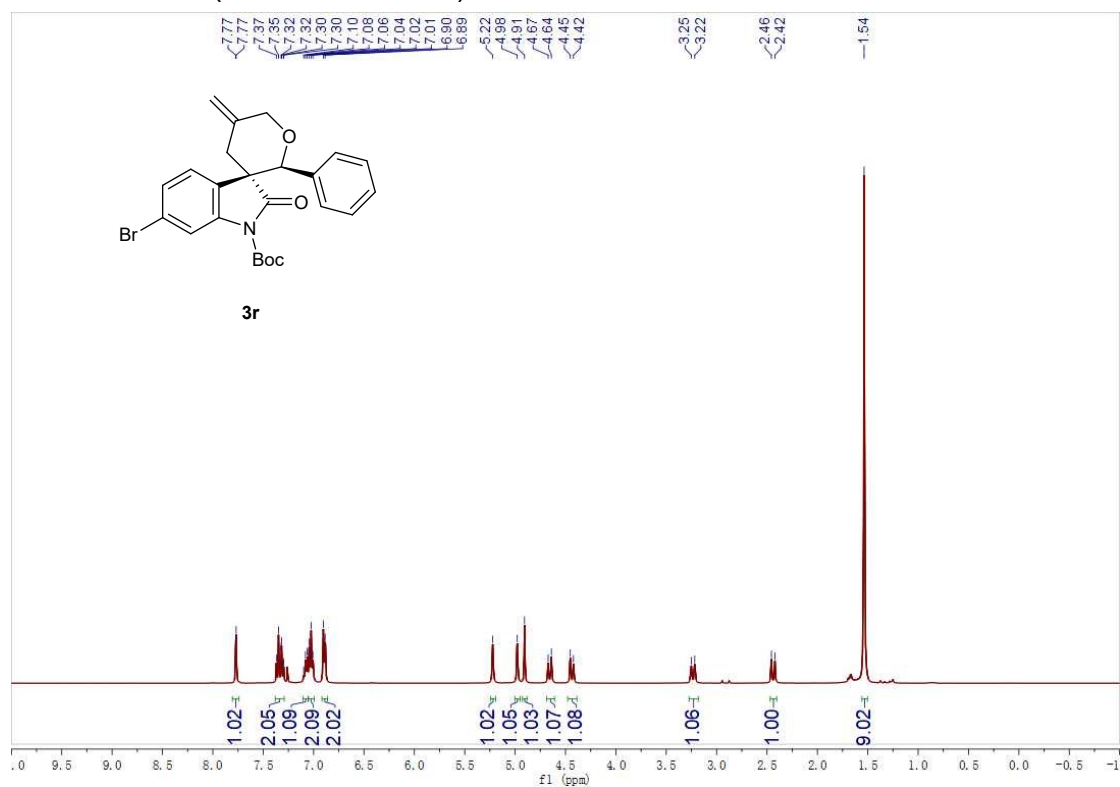

$^{13}\text{C}$   $\{^1\text{H}\}$  NMR of **3r** (100 MHz,  $\text{CDCl}_3$ )

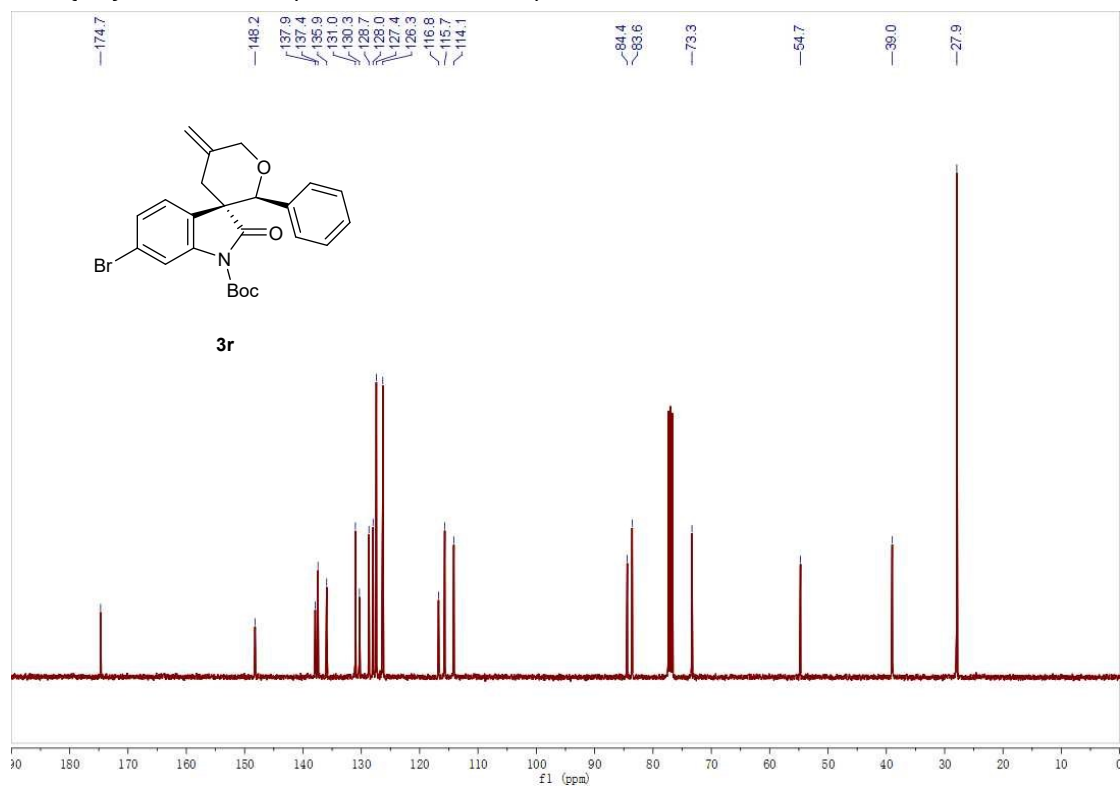

$^1\text{H}$  NMR of **3t** (400 MHz,  $\text{CDCl}_3$ )

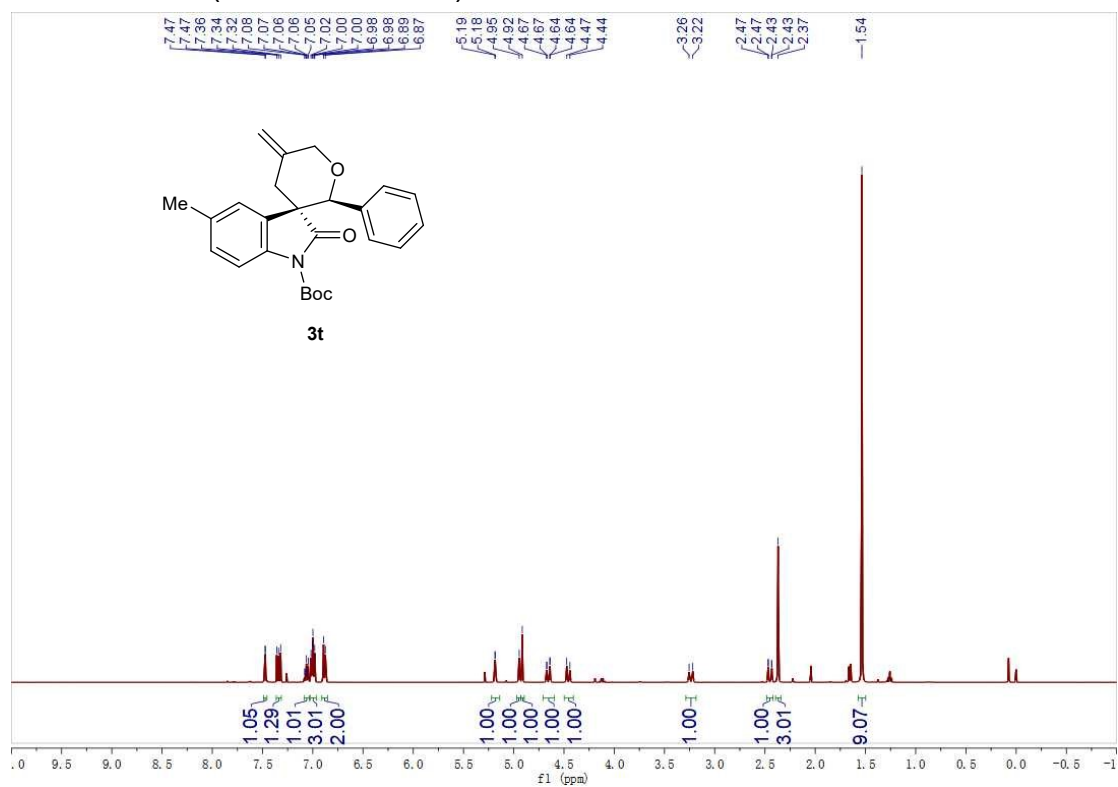

$^{13}\text{C}$   $\{^1\text{H}\}$  NMR of **3t** (100 MHz,  $\text{CDCl}_3$ )

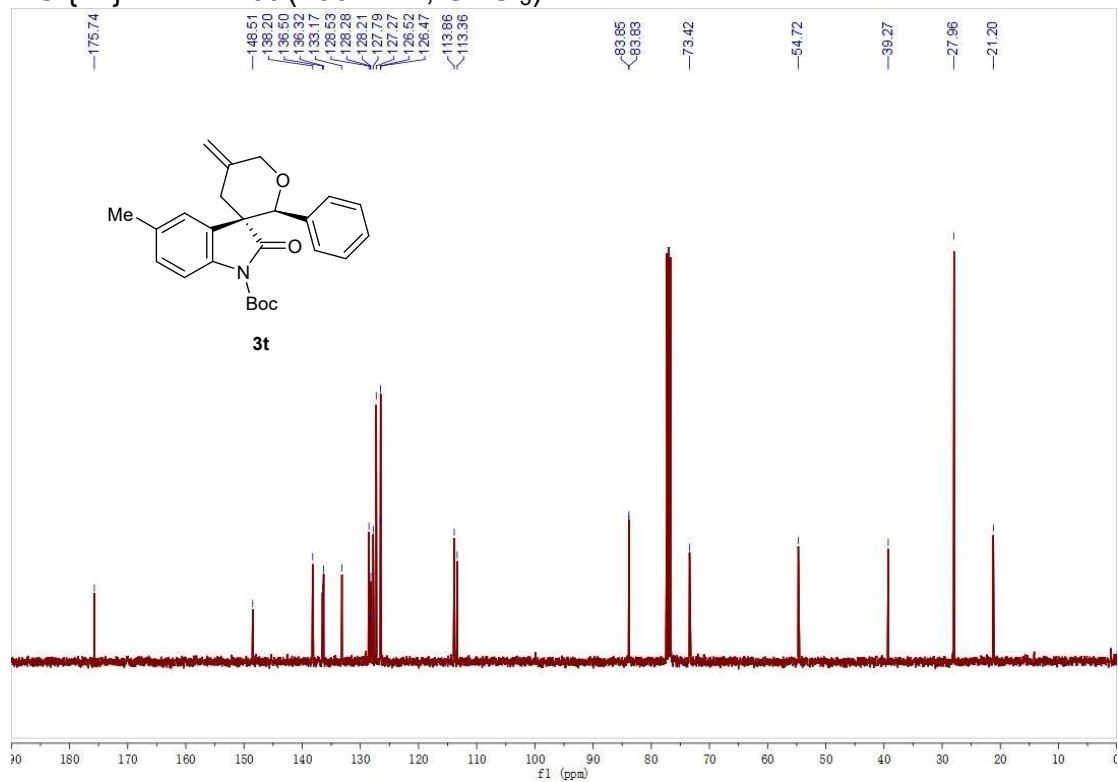

<sup>1</sup>H NMR of **3w** (400 MHz, CDCl<sub>3</sub>)

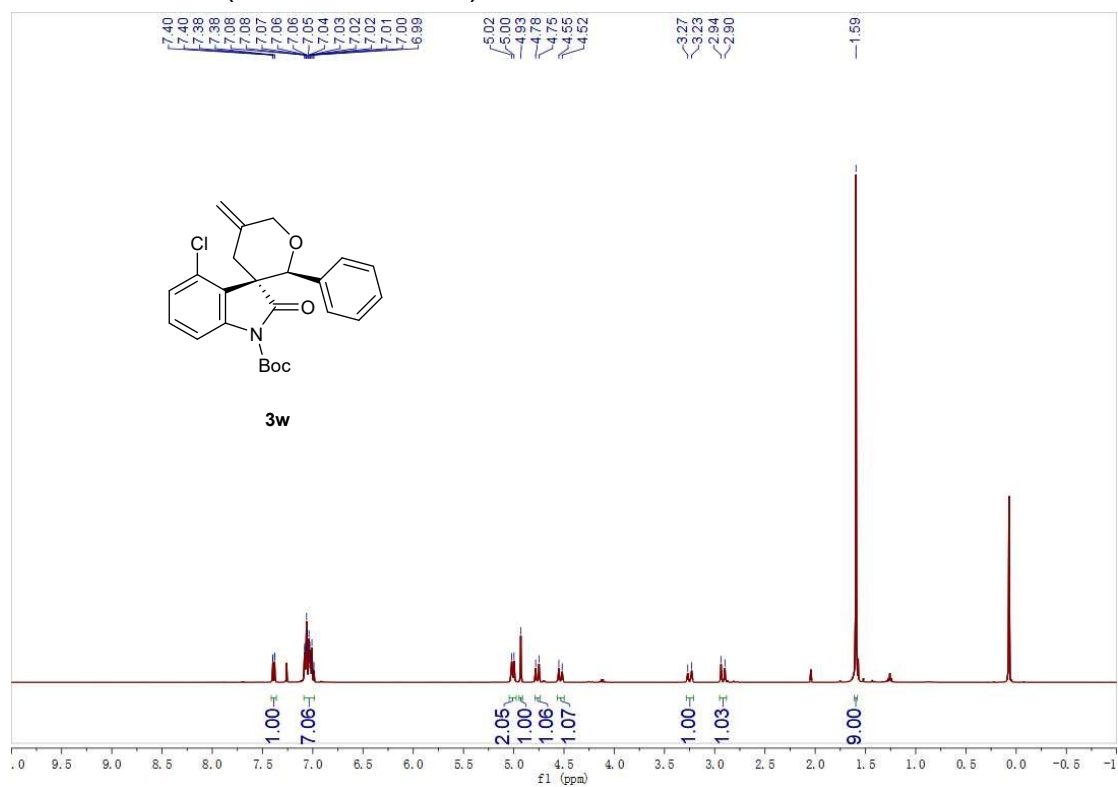

<sup>13</sup>C {<sup>1</sup>H} NMR of **3w** (100 MHz, CDCl<sub>3</sub>)

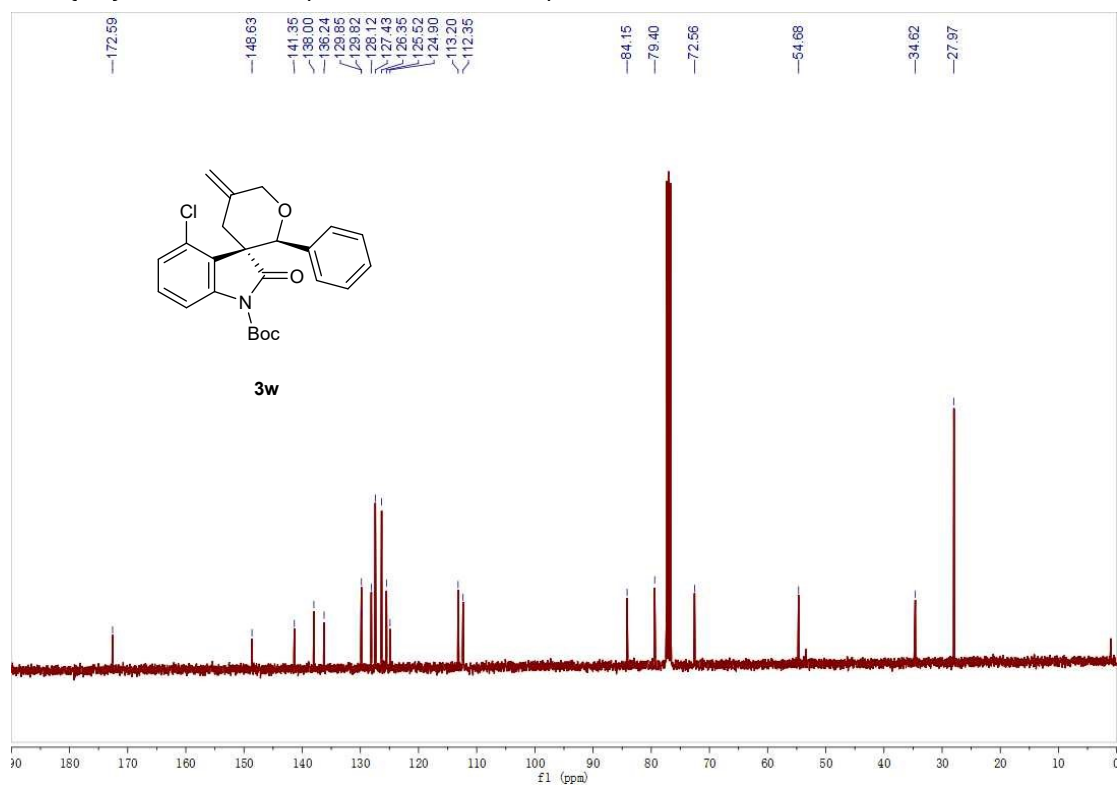

$^1\text{H}$  NMR of **3x** (400 MHz,  $\text{CDCl}_3$ )

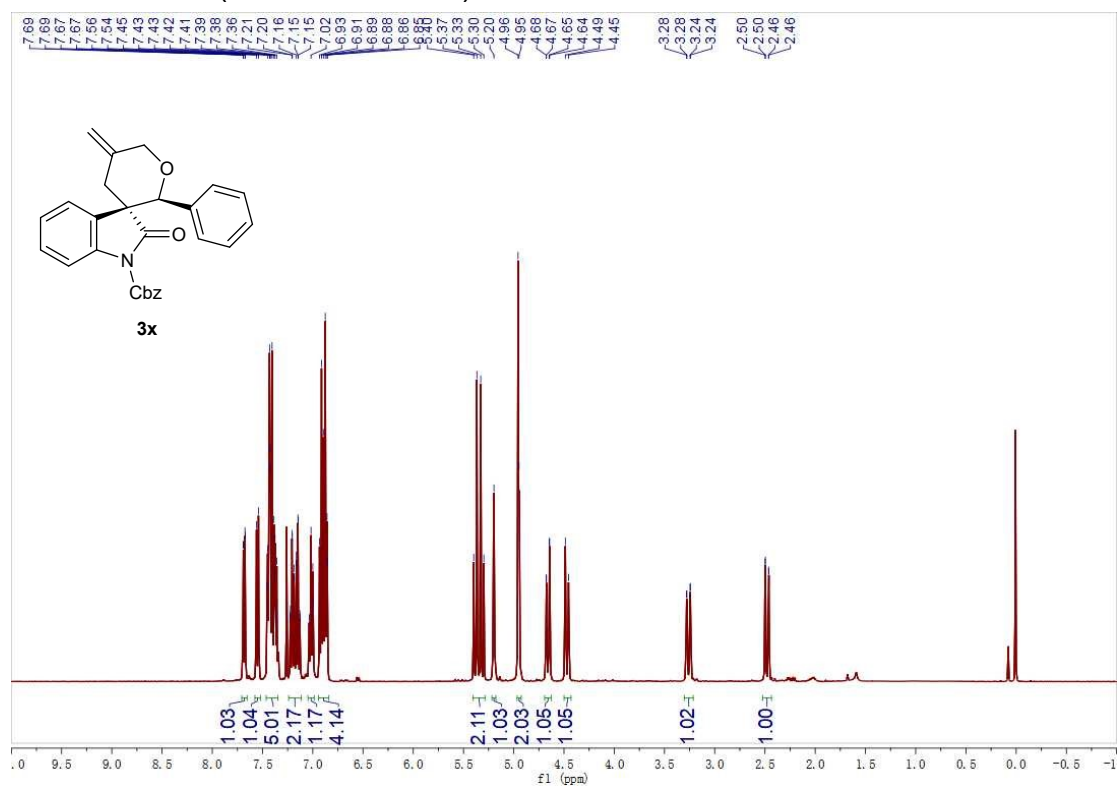

$^{13}\text{C}$   $\{^1\text{H}\}$  NMR of **3x** (100 MHz,  $\text{CDCl}_3$ )

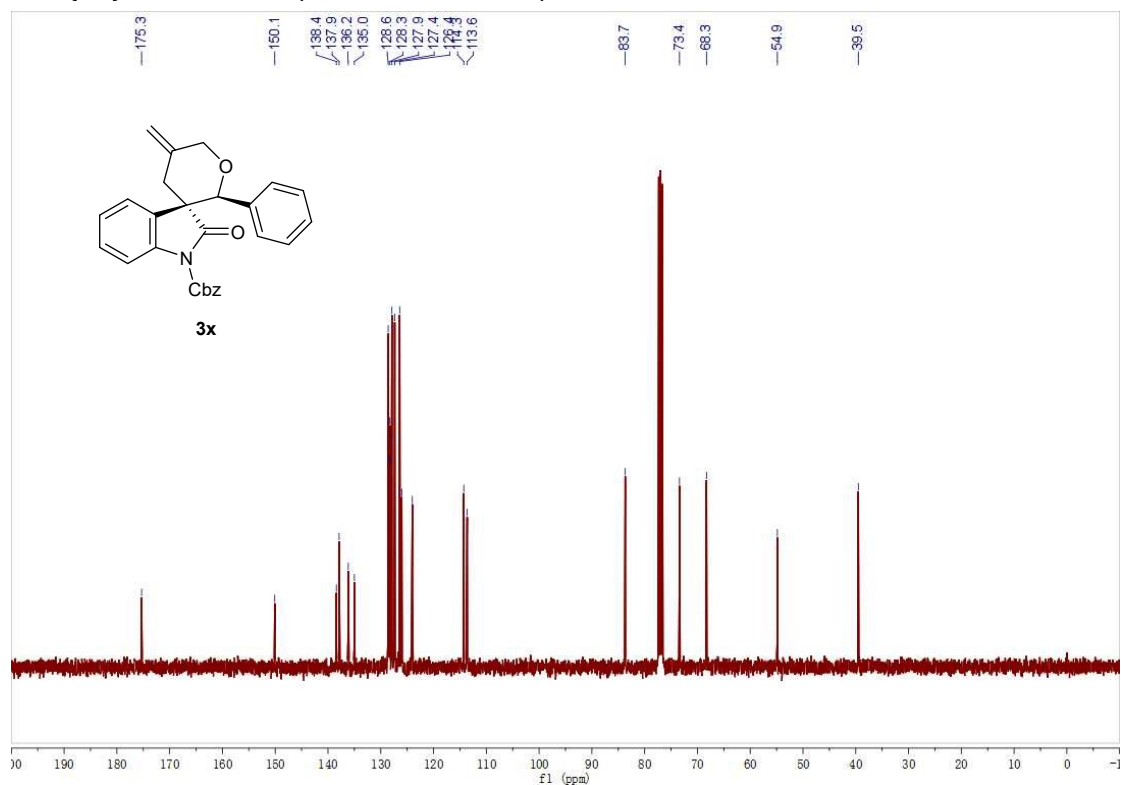



<sup>1</sup>H NMR of **3y** (400 MHz, CDCl<sub>3</sub>)

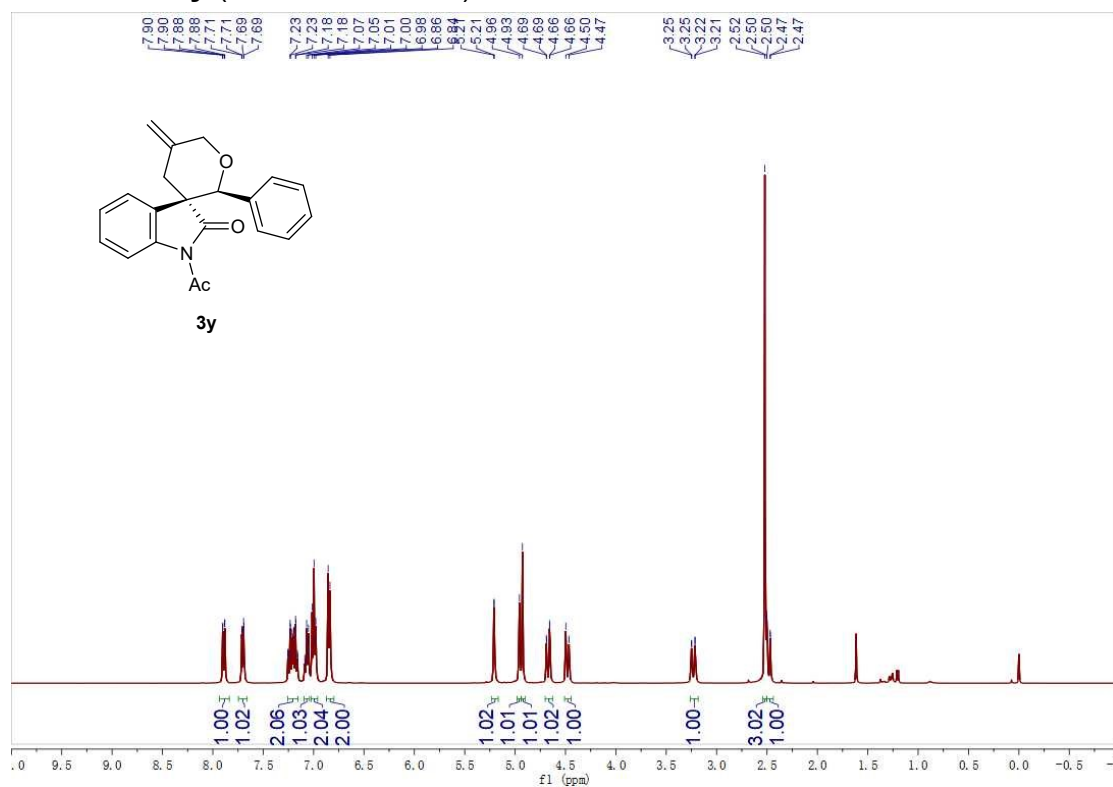

<sup>1</sup>H NMR of **4a** (400 MHz, CDCl<sub>3</sub>)

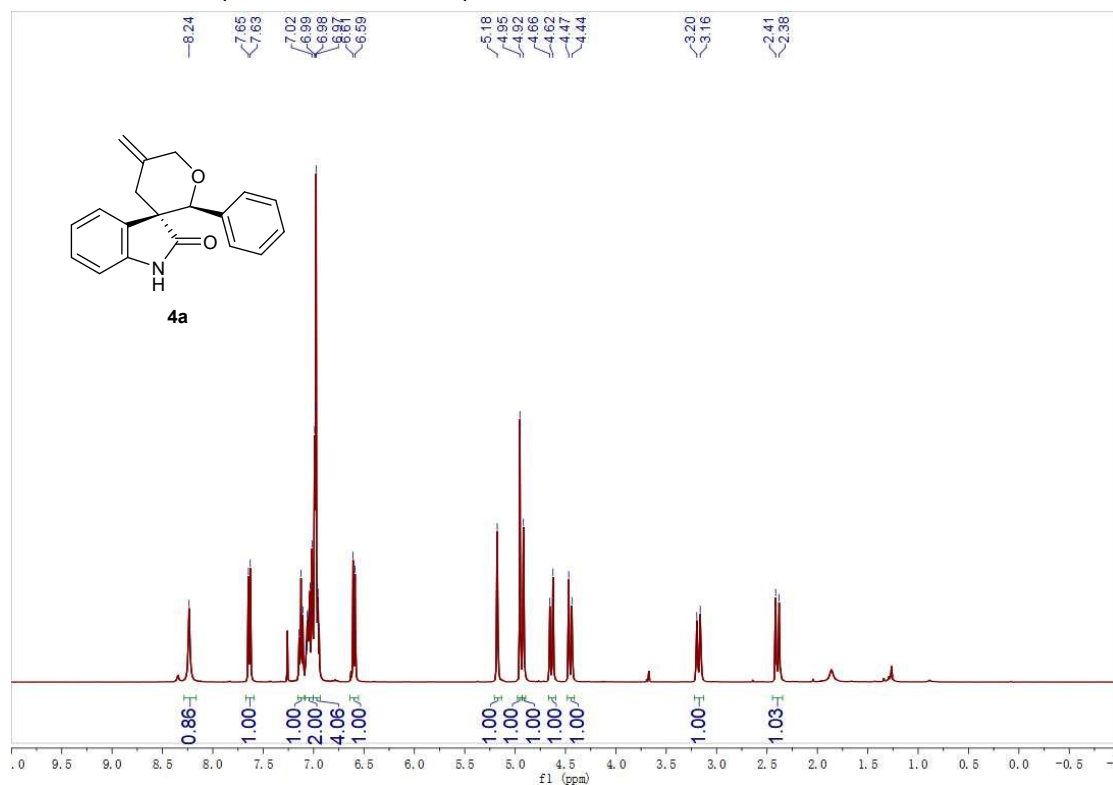

$^{13}\text{C}$   $\{^1\text{H}\}$  NMR of **4a** (100 MHz,  $\text{CDCl}_3$ )

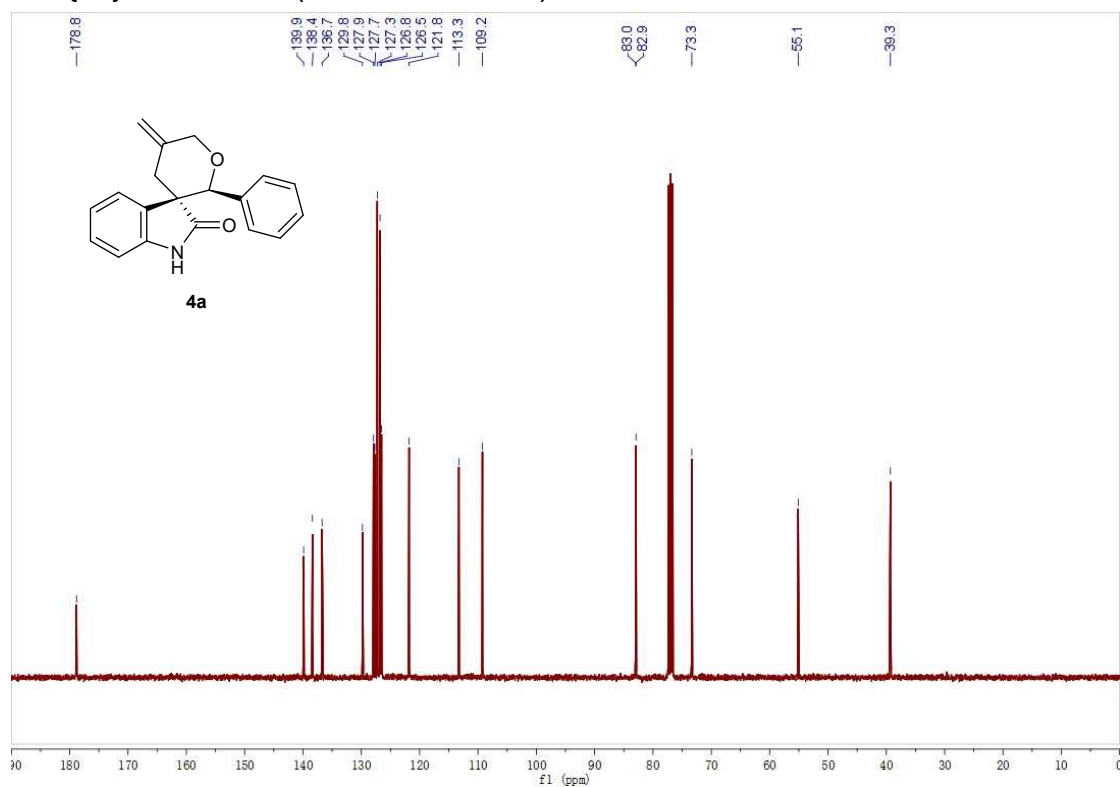

$^1\text{H}$  NMR of **5a** (400 MHz,  $\text{CDCl}_3$ )

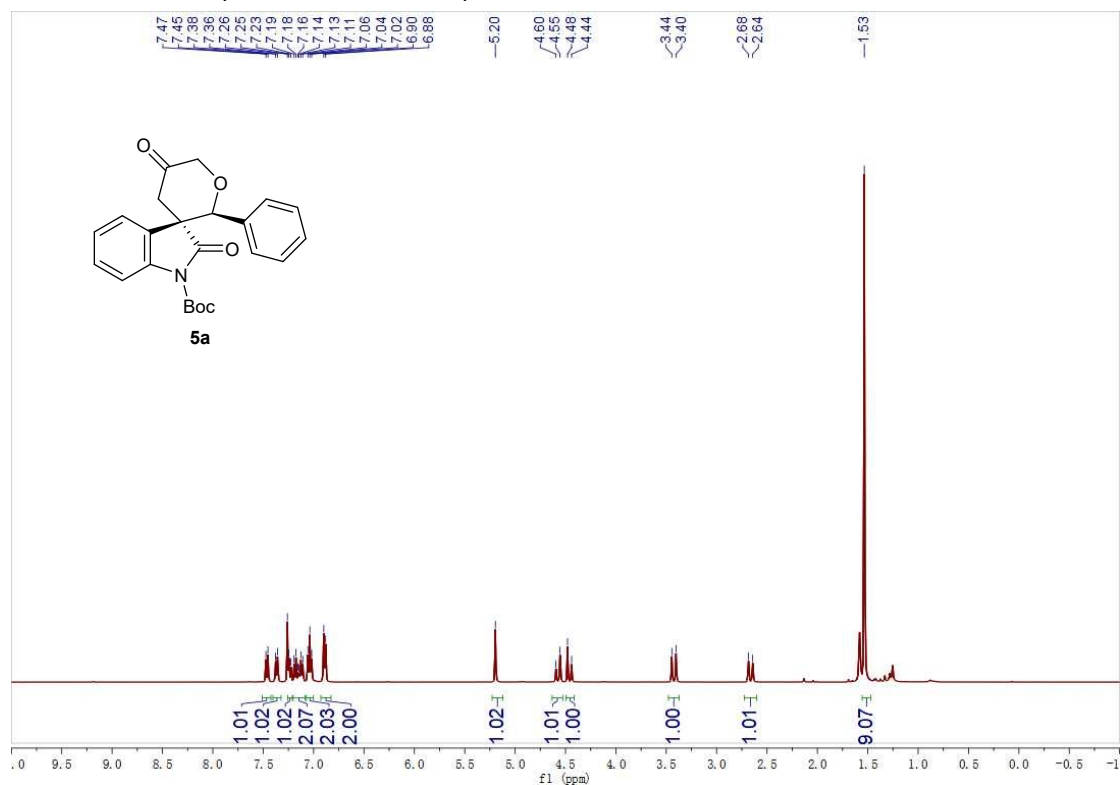

$^{13}\text{C}$   $\{^1\text{H}\}$  NMR of **5a** (100 MHz,  $\text{CDCl}_3$ )

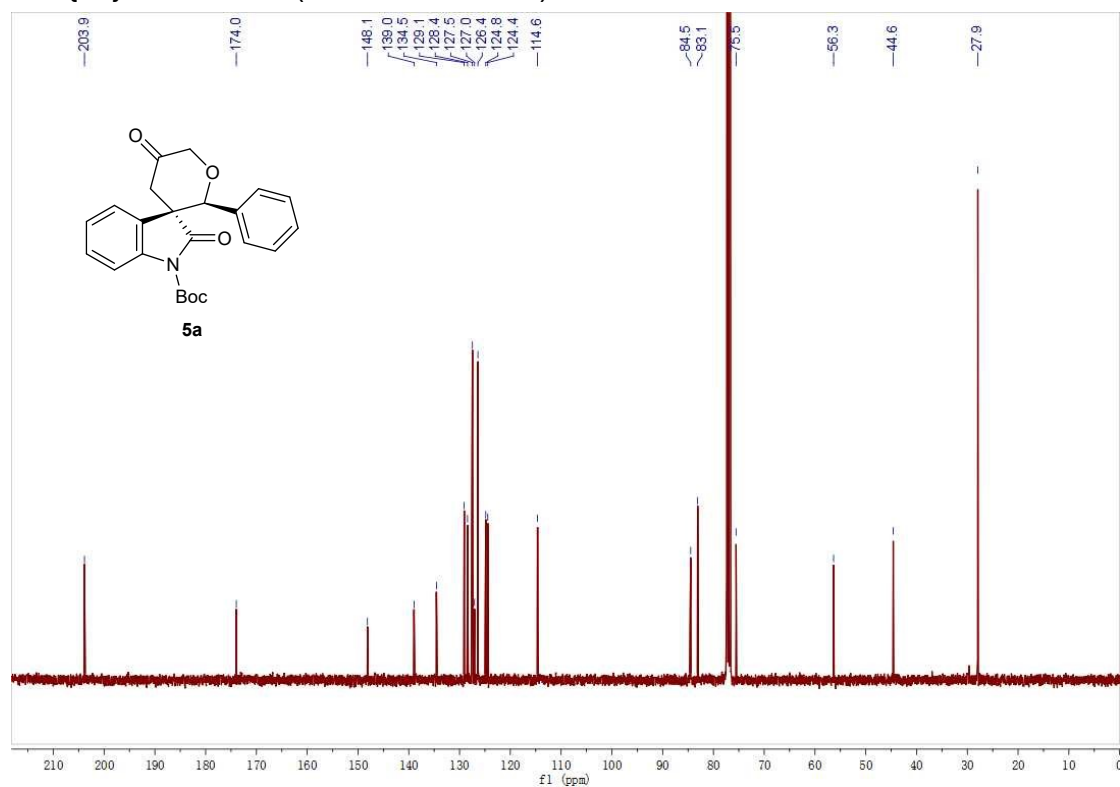

$^1\text{H}$  NMR of **6a** (400 MHz,  $\text{CDCl}_3$ )

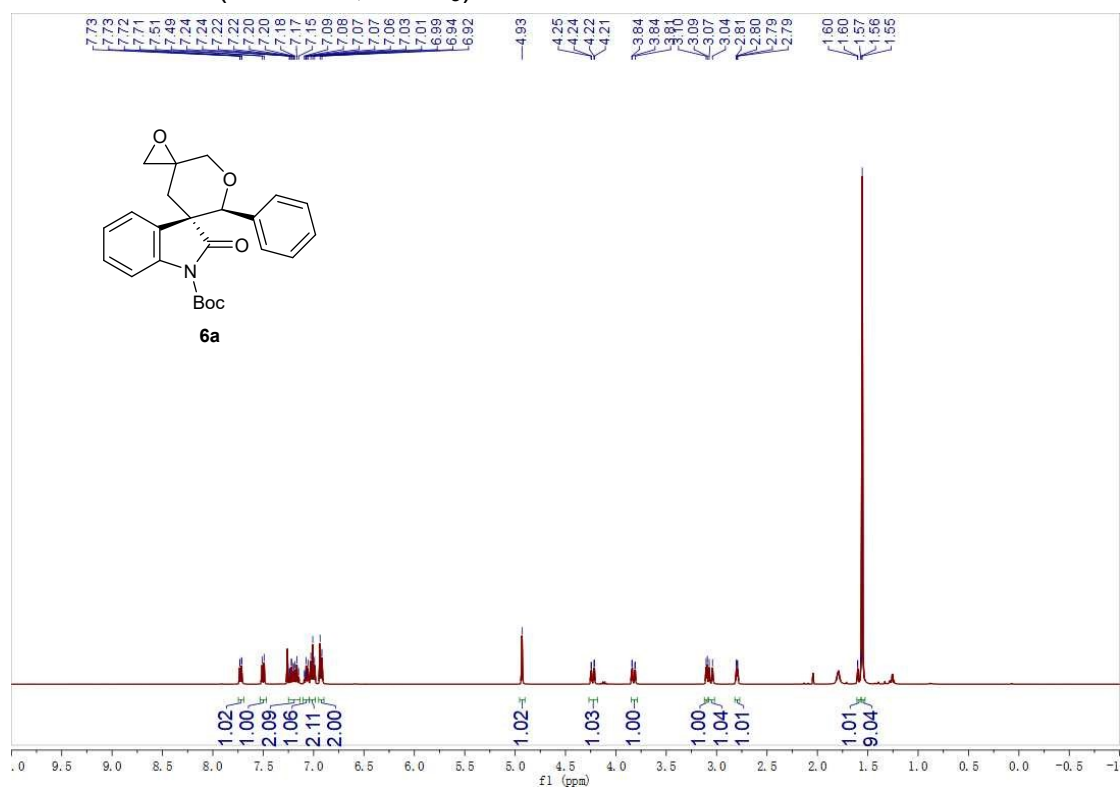

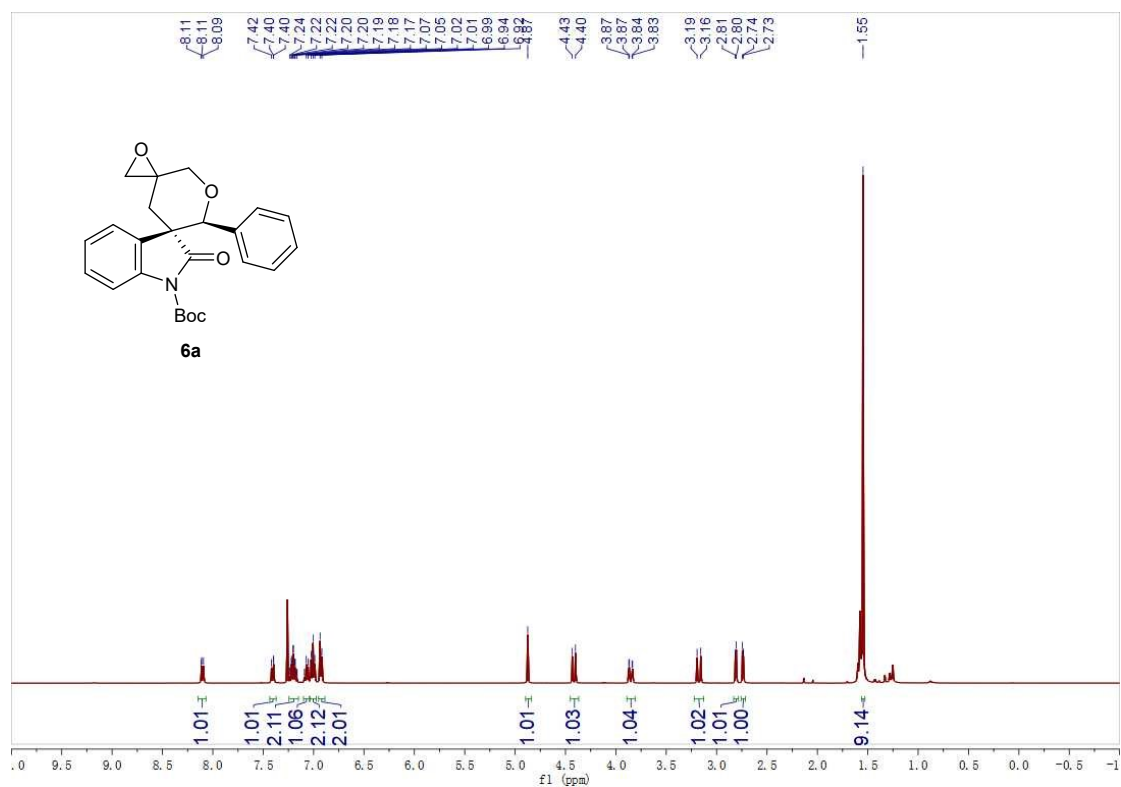

$^{13}\text{C}$   $\{^1\text{H}\}$  NMR of **6a** (100 MHz,  $\text{CDCl}_3$ )

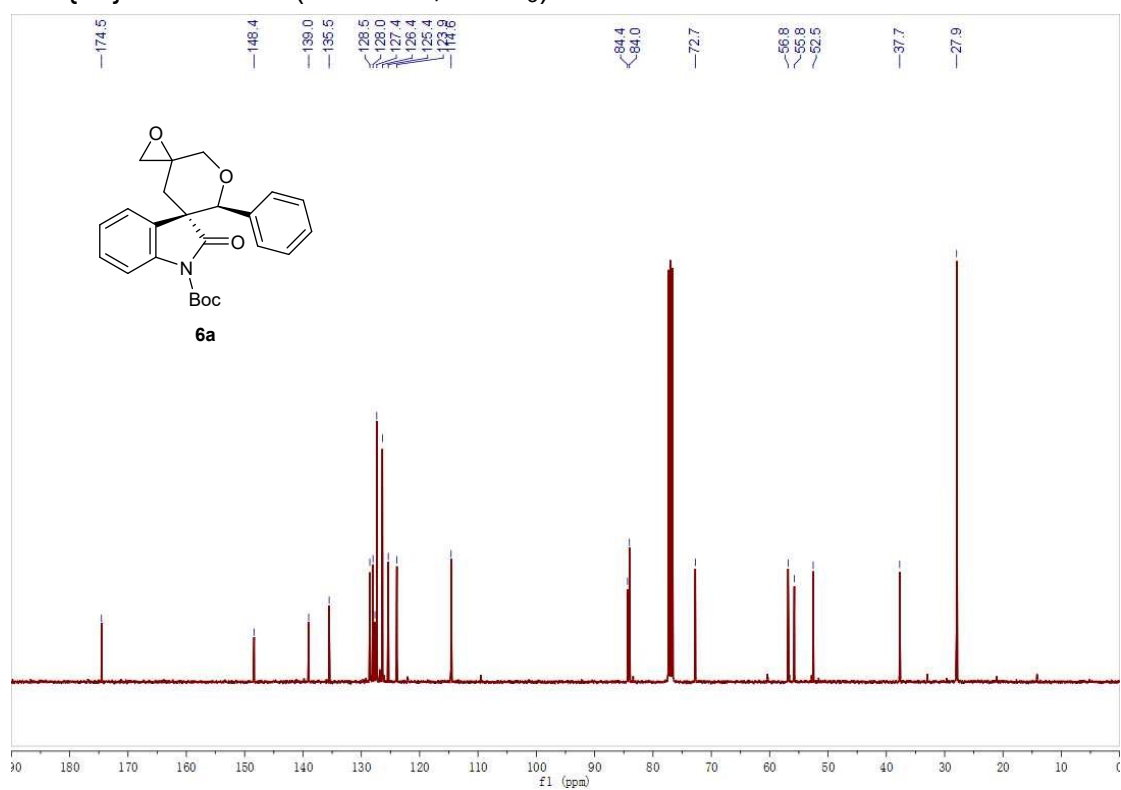

$^1\text{H}$  NMR of **7a** (400 MHz,  $\text{CDCl}_3$ )

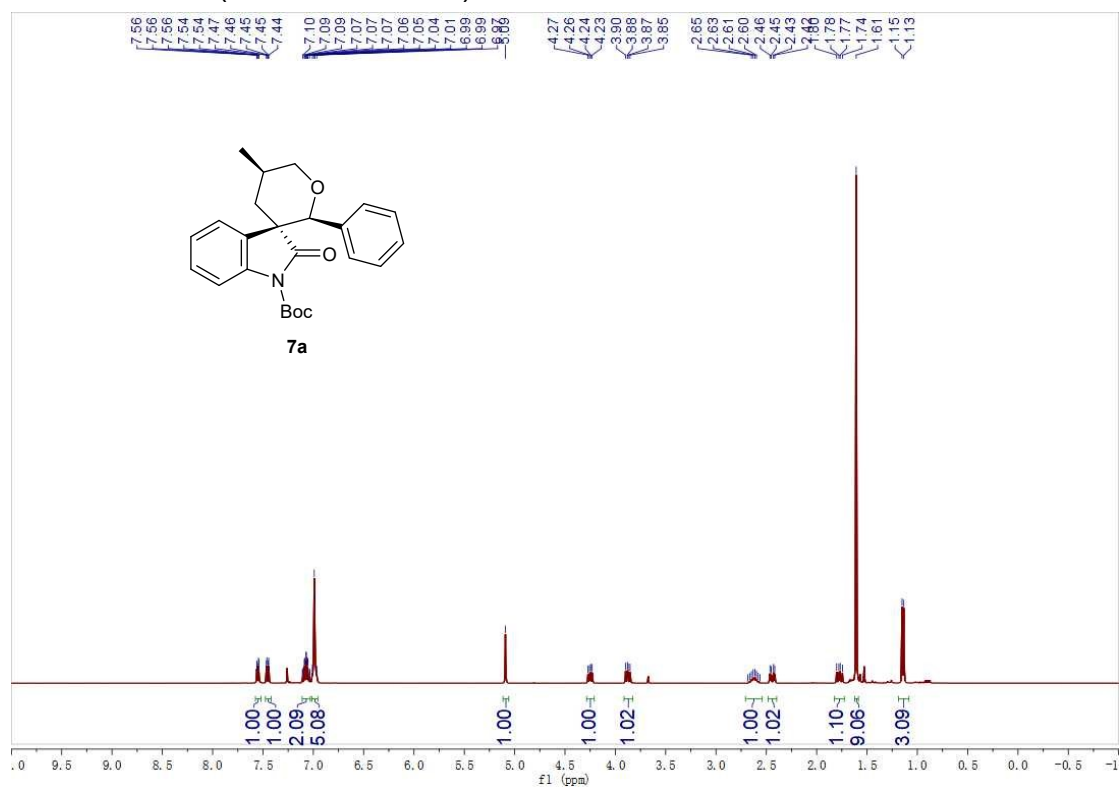

$^{13}\text{C}$   $\{^1\text{H}\}$  NMR of **7a** (100 MHz,  $\text{CDCl}_3$ )

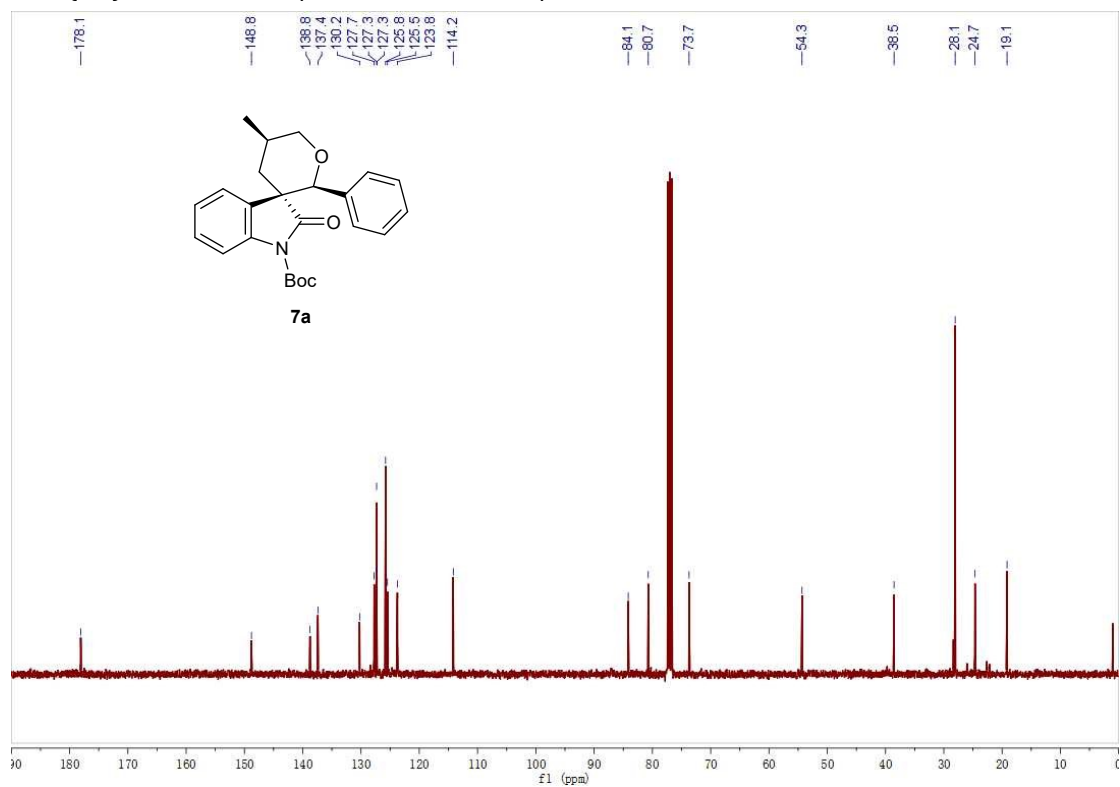

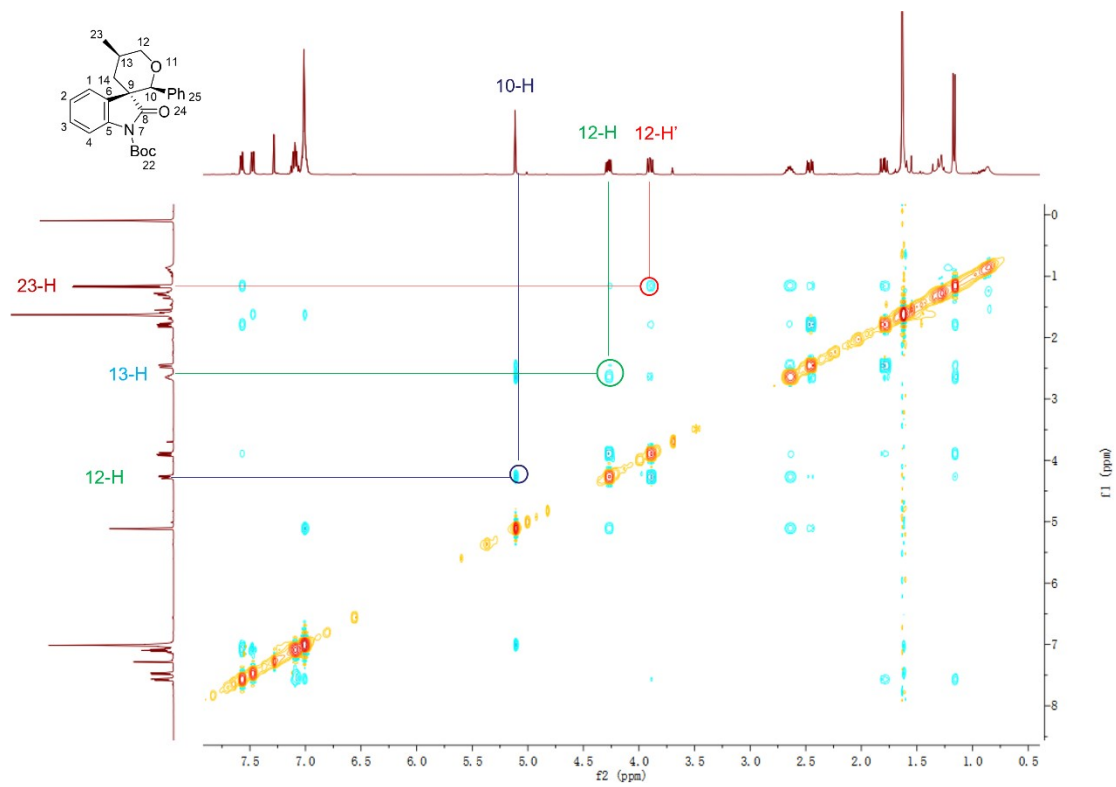

## 11. HPLC chromatograms of representative compounds

### 3a

racemic:

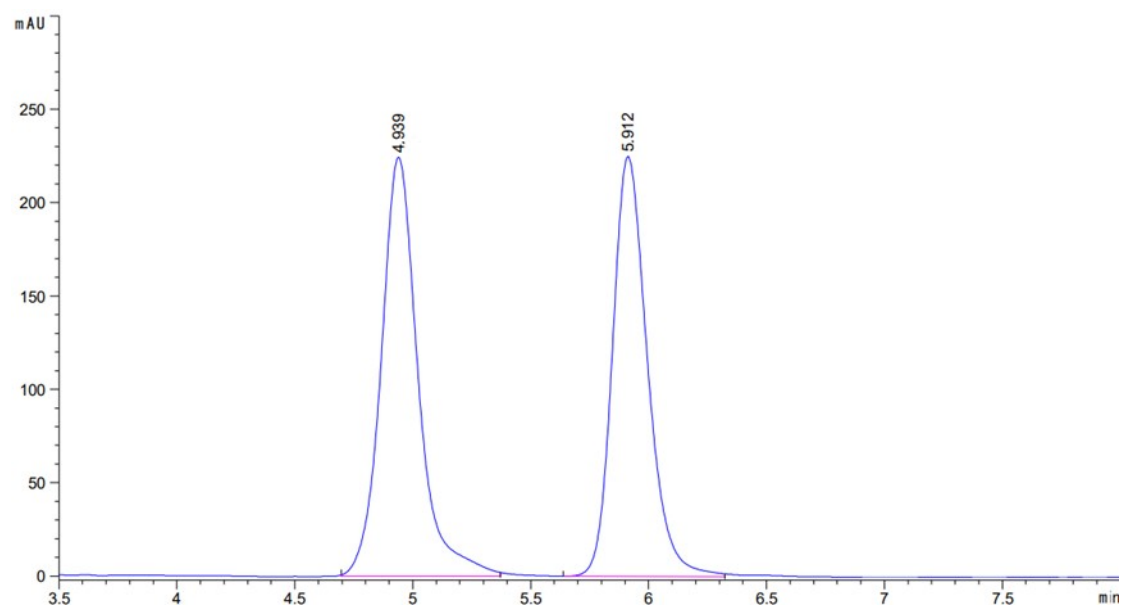

| Peak # | RetTime [min] | Type | Width [min] | Area [mAU*s] | Height [mAU] | Area %  |
|--------|---------------|------|-------------|--------------|--------------|---------|
| 1      | 4.939         | FM   | 0.1818      | 2448.62134   | 224.42850    | 51.4055 |
| 2      | 5.912         | MF   | 0.1716      | 2314.71997   | 224.85594    | 48.5945 |

chiral:

Method A

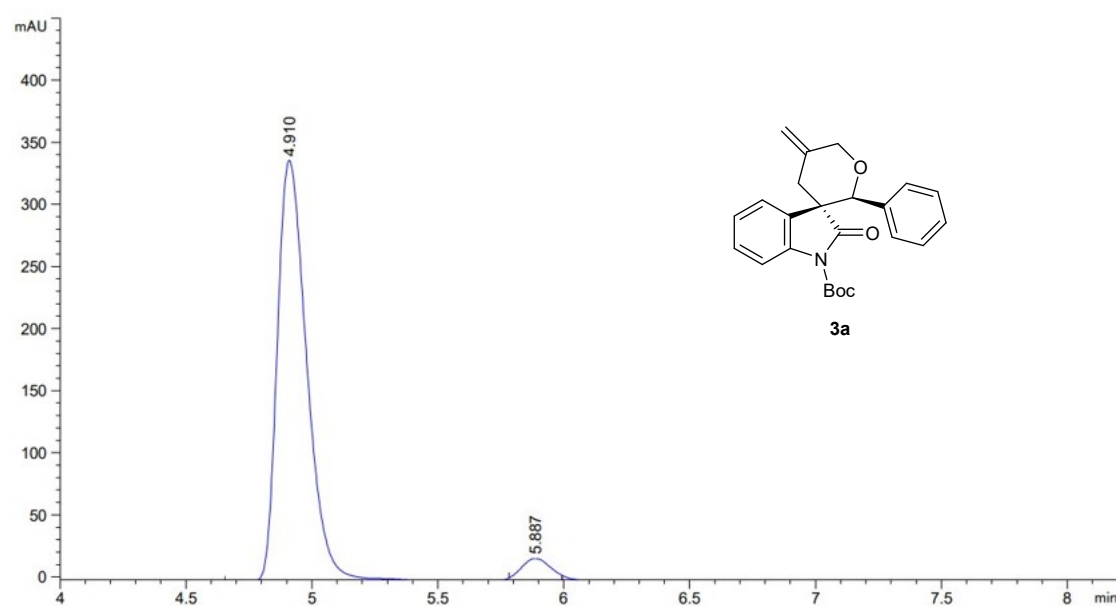

| Peak # | RetTime [min] | Type | Width [min] | Area [mAU*s] | Height [mAU] | Area %  |
|--------|---------------|------|-------------|--------------|--------------|---------|
| 1      | 4.910         | MF   | 0.1350      | 2746.08789   | 338.96597    | 94.8419 |
| 2      | 5.887         | MF   | 0.1350      | 149.35091    | 18.44167     | 5.1581  |

### Method B

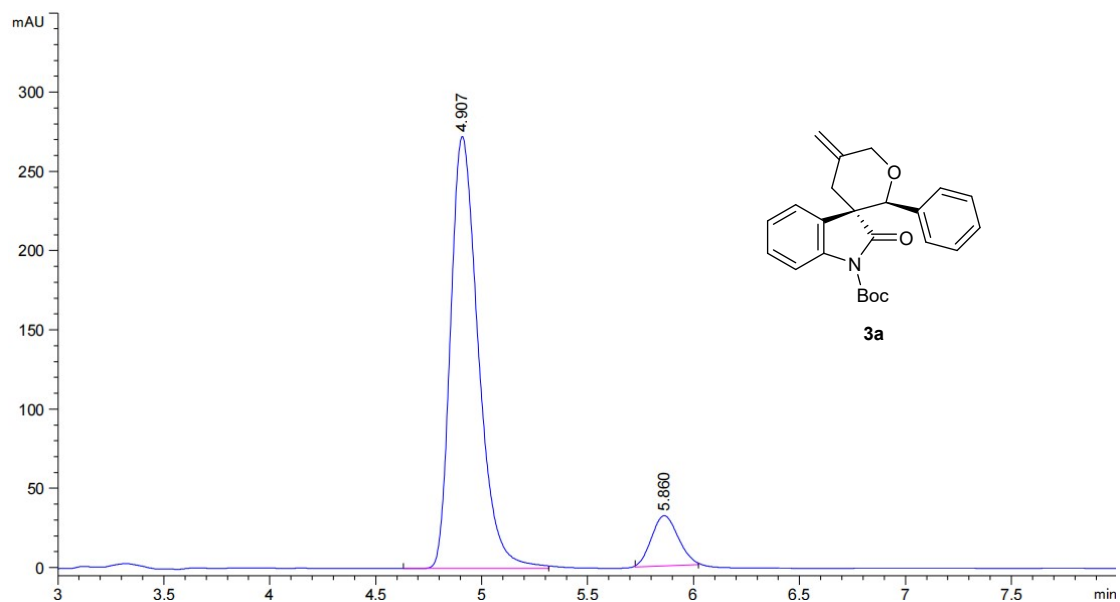

| Peak # | RetTime [min] | Type | Width [min] | Area [mAU*s] | Height [mAU] | Area %  |
|--------|---------------|------|-------------|--------------|--------------|---------|
| 1      | 4.907         | MF   | 0.1511      | 2471.22974   | 272.64468    | 89.8946 |
| 2      | 5.860         | MM   | 0.1454      | 277.80167    | 31.85209     | 10.1054 |

### 3b

racemic:

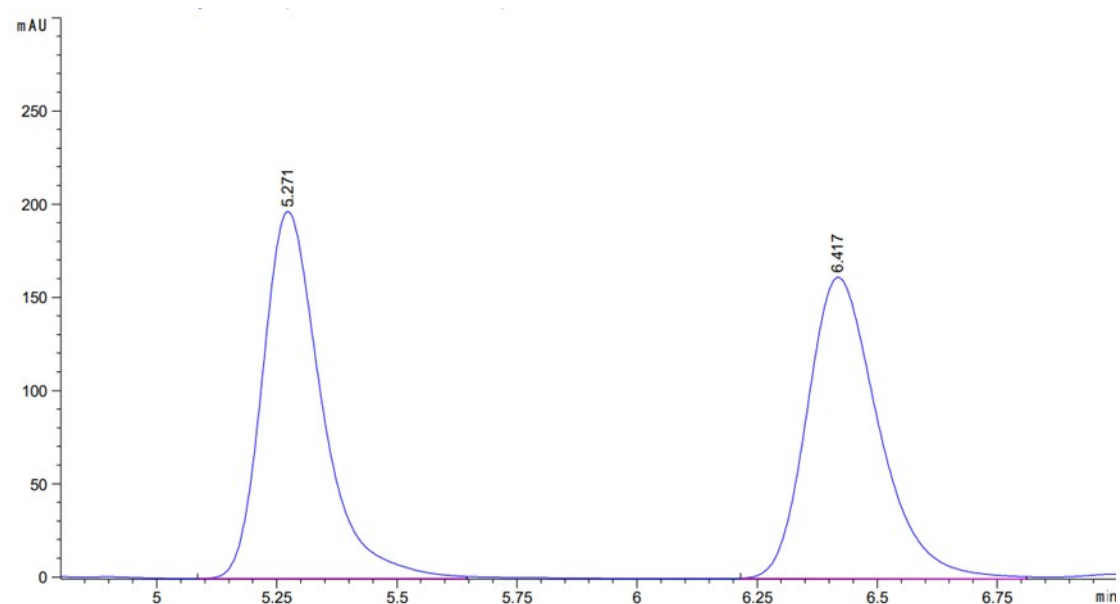



| Peak # | RetTime [min] | Type | Width [min] | Area [mAU*s] | Height [mAU] | Area %  |
|--------|---------------|------|-------------|--------------|--------------|---------|
| 1      | 5.271         | MF   | 0.1420      | 1676.79724   | 196.83427    | 50.1362 |
| 2      | 6.417         | MM   | 0.1721      | 1667.68677   | 161.52570    | 49.8638 |

chrial:  
Method A

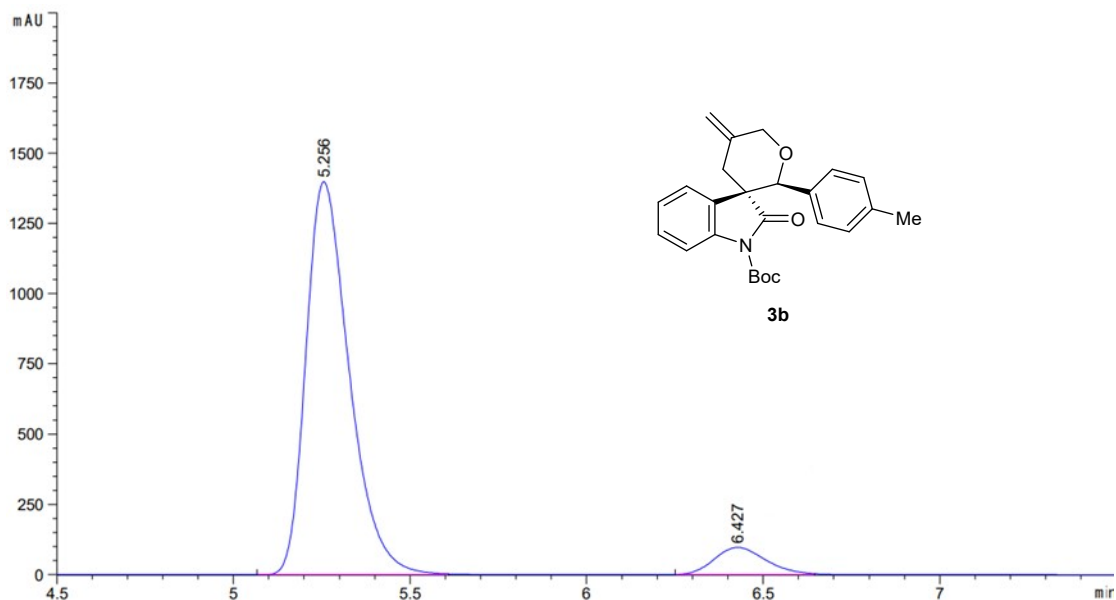

| Peak # | RetTime [min] | Type | Width [min] | Area [mAU*s] | Height [mAU] | Area %  |
|--------|---------------|------|-------------|--------------|--------------|---------|
| 1      | 5.256         | MF   | 0.1420      | 1.19249e4    | 1399.35156   | 92.3073 |
| 2      | 6.427         | MF   | 0.1702      | 993.80249    | 97.29763     | 7.6927  |

Method B

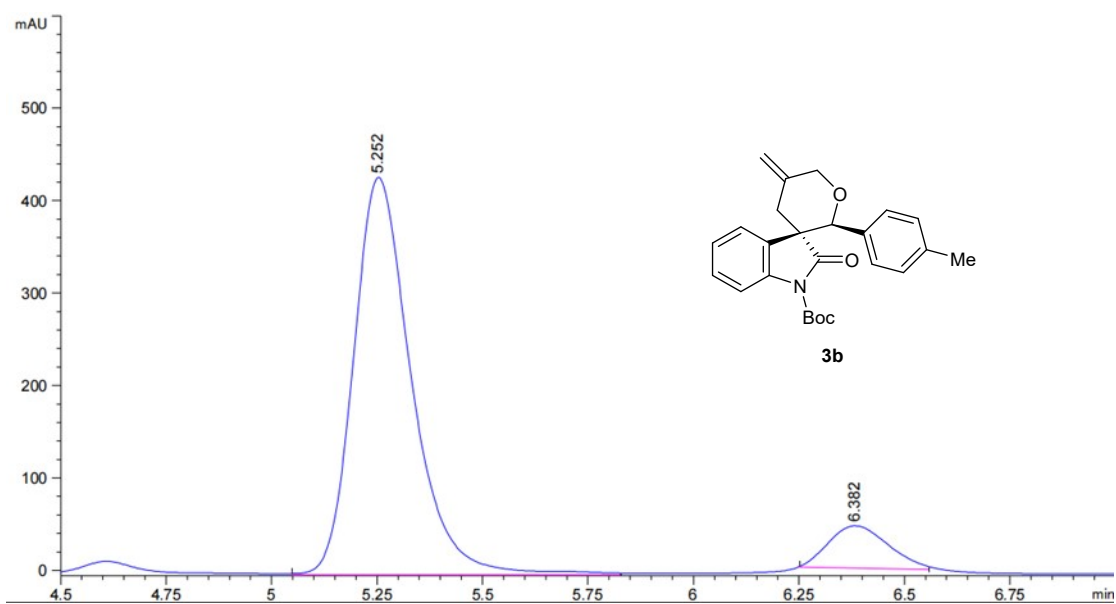

| Peak # | RetTime [min] | Type | Width [min] | Area [mAU*s] | Height [mAU] | Area %  |
|--------|---------------|------|-------------|--------------|--------------|---------|
| 1      | 5.252         | MM   | 0.1587      | 4095.69214   | 430.03888    | 90.1235 |
| 2      | 6.382         | MM   | 0.1636      | 448.84137    | 45.71336     | 9.8765  |

### 3c

racemic:

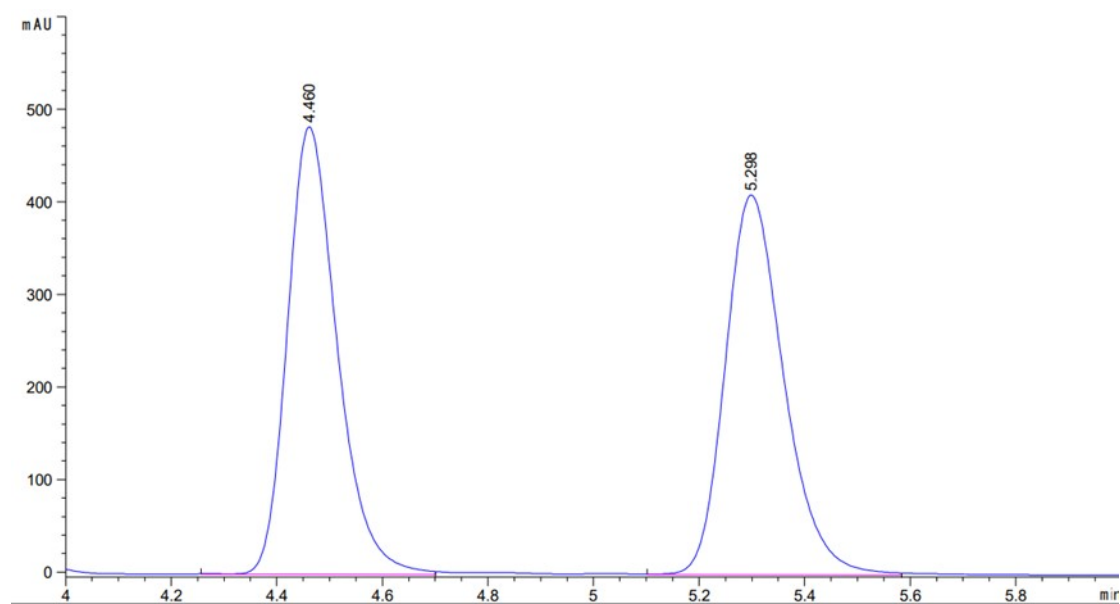

| Peak # | RetTime [min] | Type | Width [min] | Area [mAU*s] | Height [mAU] | Area %  |
|--------|---------------|------|-------------|--------------|--------------|---------|
| 1      | 4.460         | FM   | 0.1092      | 3167.48315   | 483.52481    | 50.0110 |
| 2      | 5.298         | MF   | 0.1286      | 3166.09058   | 410.27994    | 49.9890 |

chiral:

Method A

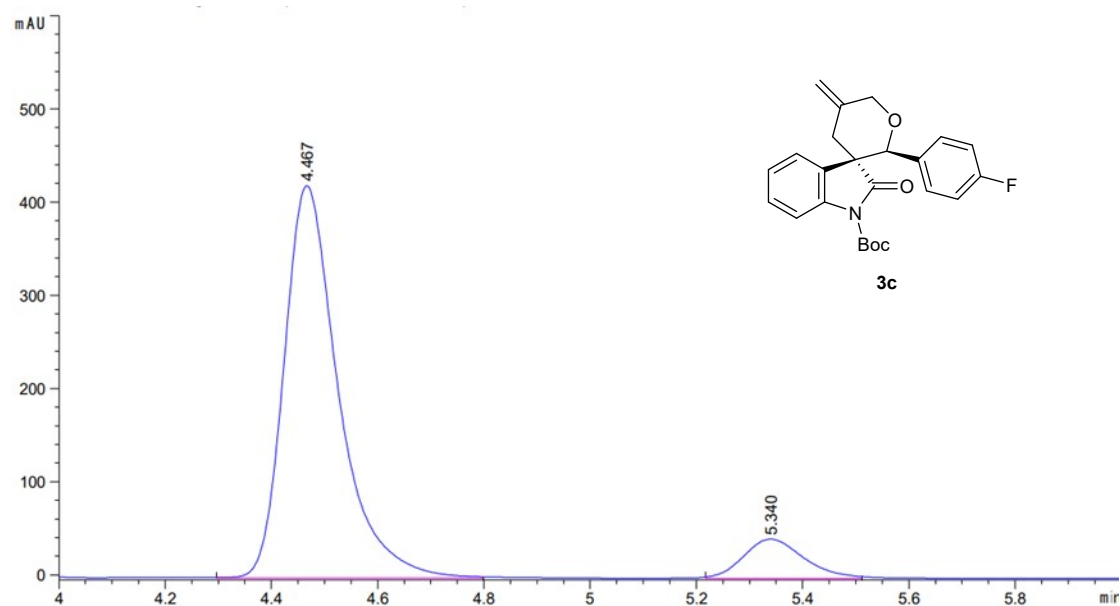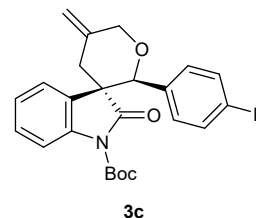

| Peak # | RetTime [min] | Type | Width [min] | Area [mAU*s] | Height [mAU] | Area %  |
|--------|---------------|------|-------------|--------------|--------------|---------|
| 1      | 4.467         | FM   | 0.1179      | 2977.93018   | 420.90634    | 90.0624 |
| 2      | 5.340         | MF   | 0.1306      | 328.58804    | 41.92053     | 9.9376  |

### Method B

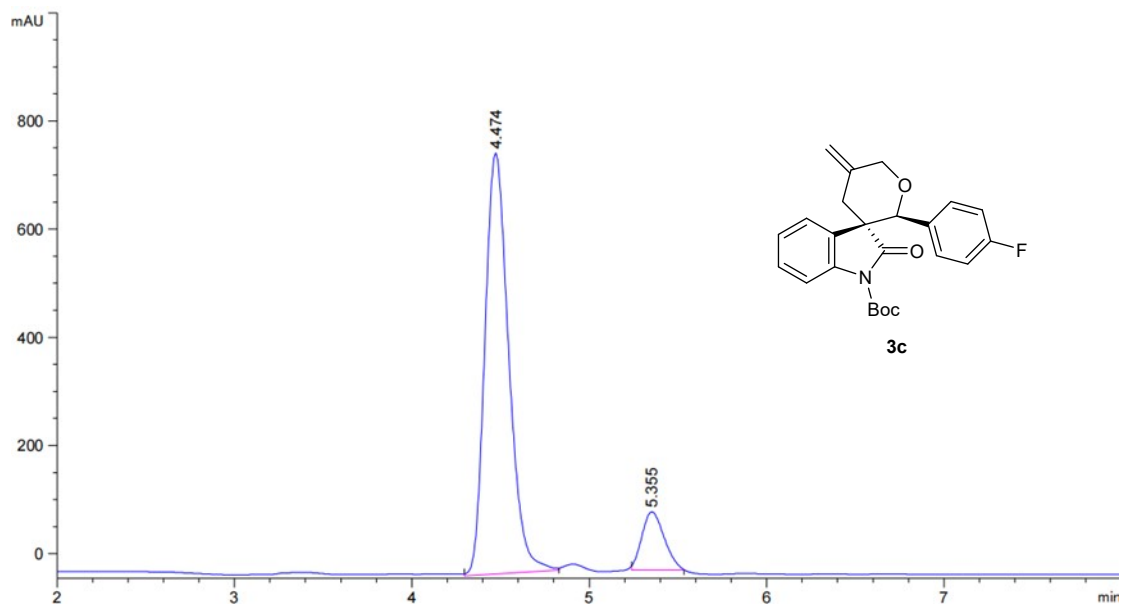

| Peak # | RetTime [min] | Type | Width [min] | Area [mAU*s] | Height [mAU] | Area %  |
|--------|---------------|------|-------------|--------------|--------------|---------|
| 1      | 4.474         | MM   | 0.1548      | 7225.14209   | 777.66626    | 88.4157 |
| 2      | 5.355         | MM   | 0.1464      | 946.64447    | 107.80237    | 11.5843 |

### 3d

racemic:

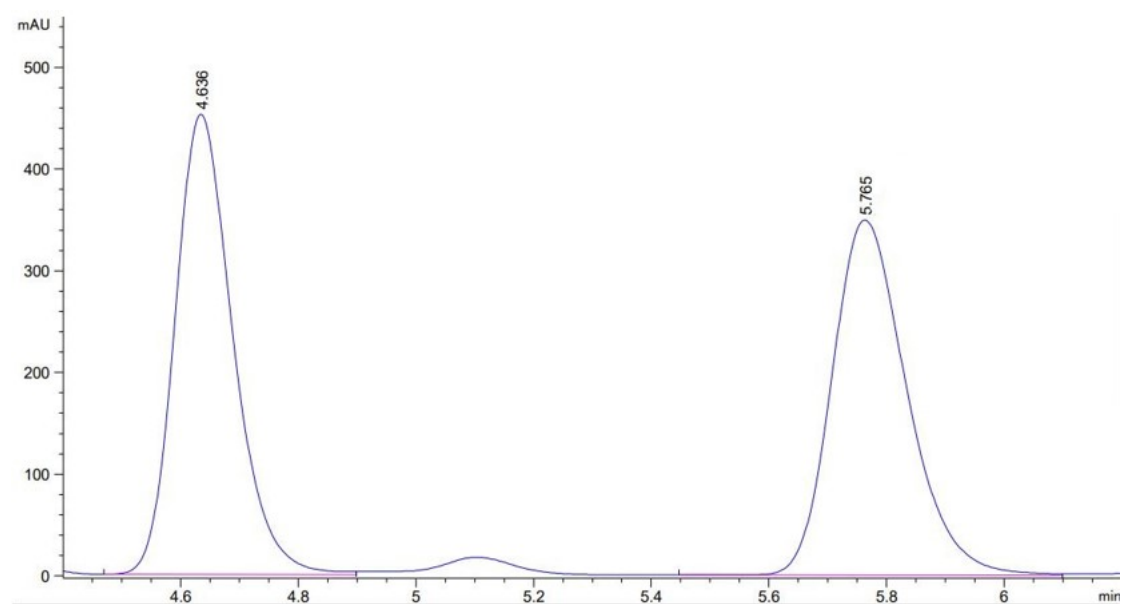

| Peak # | RetTime [min] | Type | Width [min] | Area [mAU*s] | Height [mAU] | Area %  |
|--------|---------------|------|-------------|--------------|--------------|---------|
| 1      | 4.636         | MF   | 0.1141      | 3099.31250   | 452.80240    | 50.1061 |
| 2      | 5.765         | MF   | 0.1473      | 3086.18164   | 349.22672    | 49.8939 |

chrial:  
Method A

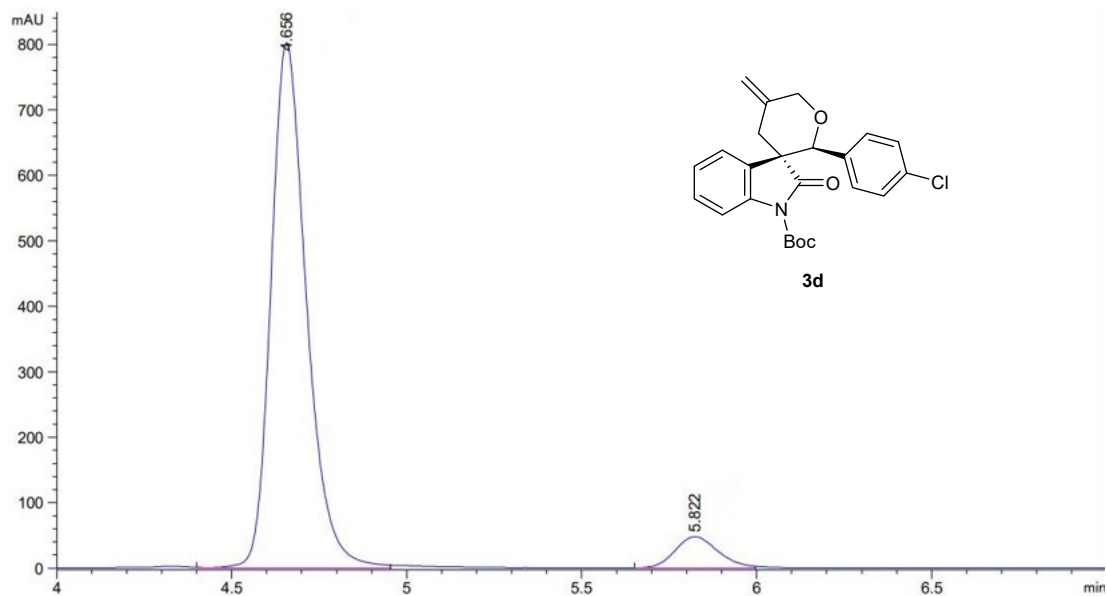

| Peak # | RetTime [min] | Type | Width [min] | Area [mAU*s] | Height [mAU] | Area %  |
|--------|---------------|------|-------------|--------------|--------------|---------|
| 1      | 4.656         | MF   | 0.1170      | 5631.16650   | 801.85394    | 93.2837 |
| 2      | 5.822         | MF   | 0.1422      | 405.43326    | 47.53395     | 6.7163  |

Method B

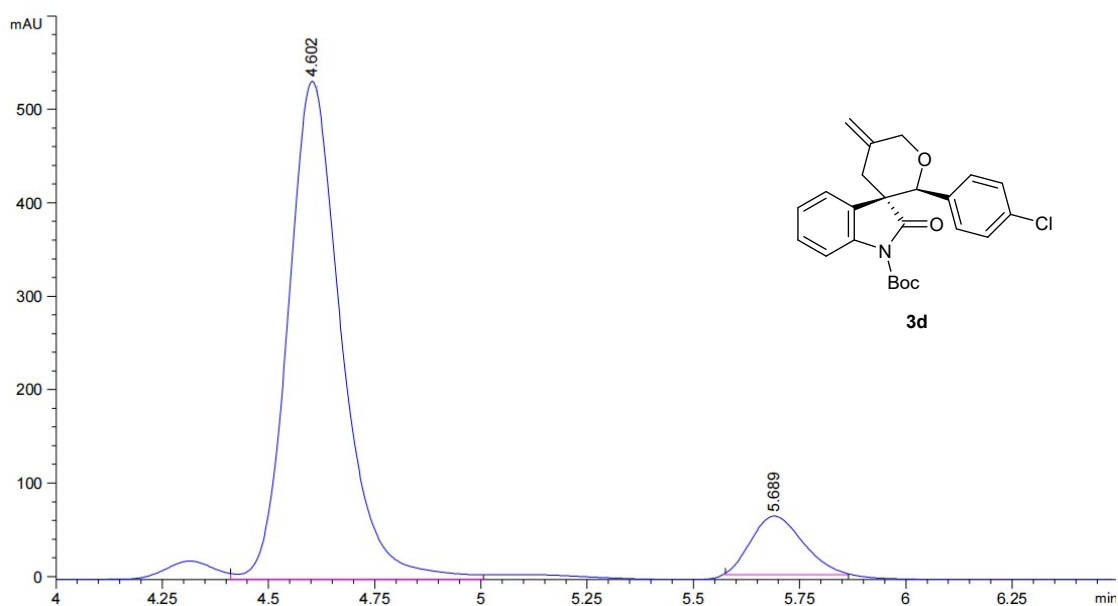

| Peak # | RetTime [min] | Type | Width [min] | Area [mAU*s] | Height [mAU] | Area %  |
|--------|---------------|------|-------------|--------------|--------------|---------|
| 1      | 4.602         | MM   | 0.1444      | 4615.93359   | 532.86615    | 89.7104 |
| 2      | 5.689         | MM   | 0.1410      | 529.43555    | 62.58767     | 10.2896 |

### 3e

racemic:

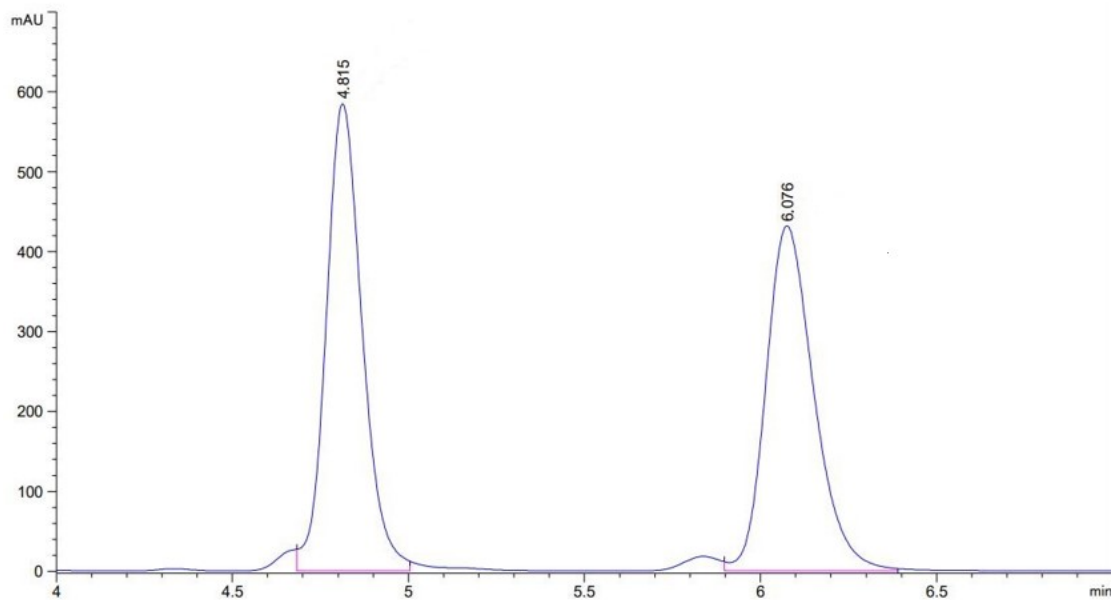

| Peak # | RetTime [min] | Type | Width [min] | Area [mAU*s] | Height [mAU] | Area %  |
|--------|---------------|------|-------------|--------------|--------------|---------|
| 1      | 4.815         | MF   | 0.1183      | 4150.43066   | 584.70441    | 50.4205 |
| 2      | 6.076         | FM   | 0.1576      | 4081.19800   | 431.68158    | 49.5795 |

chiral:

Method A

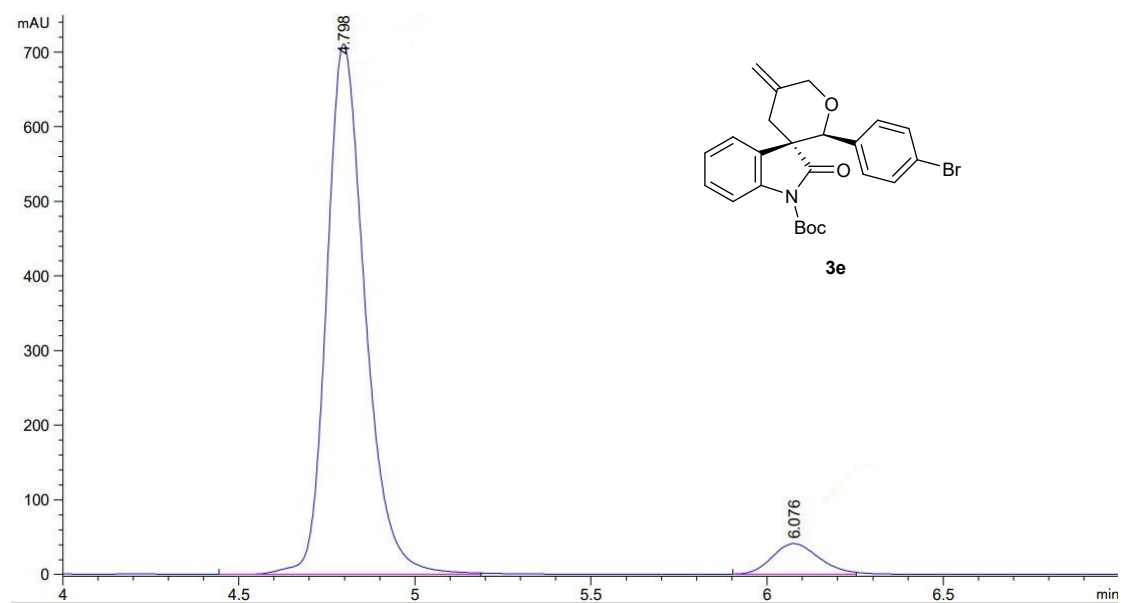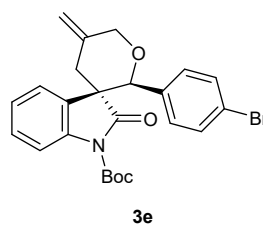

| Peak # | RetTime [min] | Type | Width [min] | Area [mAU*s] | Height [mAU] | Area %  |
|--------|---------------|------|-------------|--------------|--------------|---------|
| 1      | 4.798         | MF   | 0.1264      | 5391.36816   | 710.97644    | 93.3965 |
| 2      | 6.076         | MF   | 0.1542      | 381.18967    | 41.19269     | 6.6035  |

### Method B

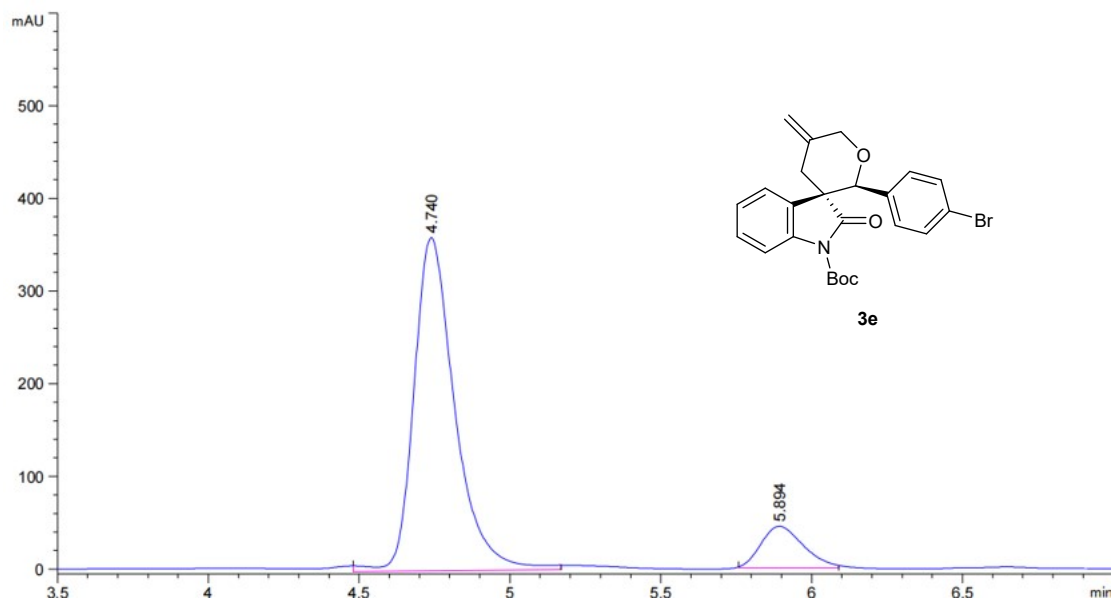

| Peak # | RetTime [min] | Type | Width [min] | Area [mAU*s] | Height [mAU] | Area %  |
|--------|---------------|------|-------------|--------------|--------------|---------|
| 1      | 4.740         | FM   | 0.1572      | 3390.49072   | 359.40253    | 88.7679 |
| 2      | 5.894         | MF   | 0.1609      | 429.01086    | 44.43409     | 11.2321 |

### 3f

racemic:

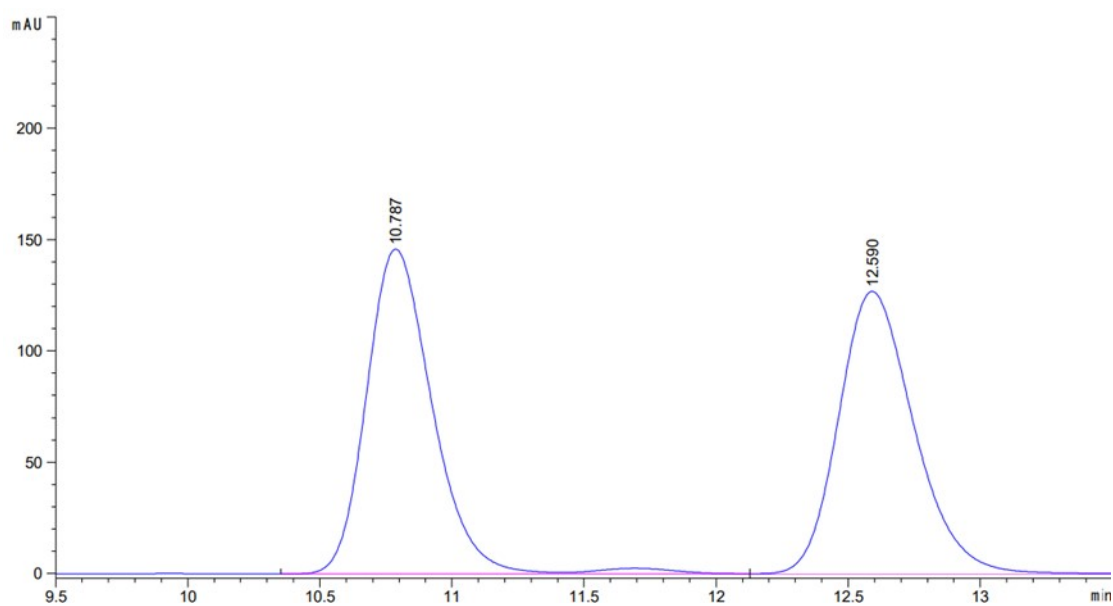

| Peak # | RetTime [min] | Type | Width [min] | Area [mAU*s] | Height [mAU] | Area %  |
|--------|---------------|------|-------------|--------------|--------------|---------|
| 1      | 10.787        | BV R | 0.2637      | 2551.31860   | 145.84697    | 50.4063 |
| 2      | 12.590        | VB   | 0.3049      | 2510.19287   | 126.80631    | 49.5937 |

chiral:

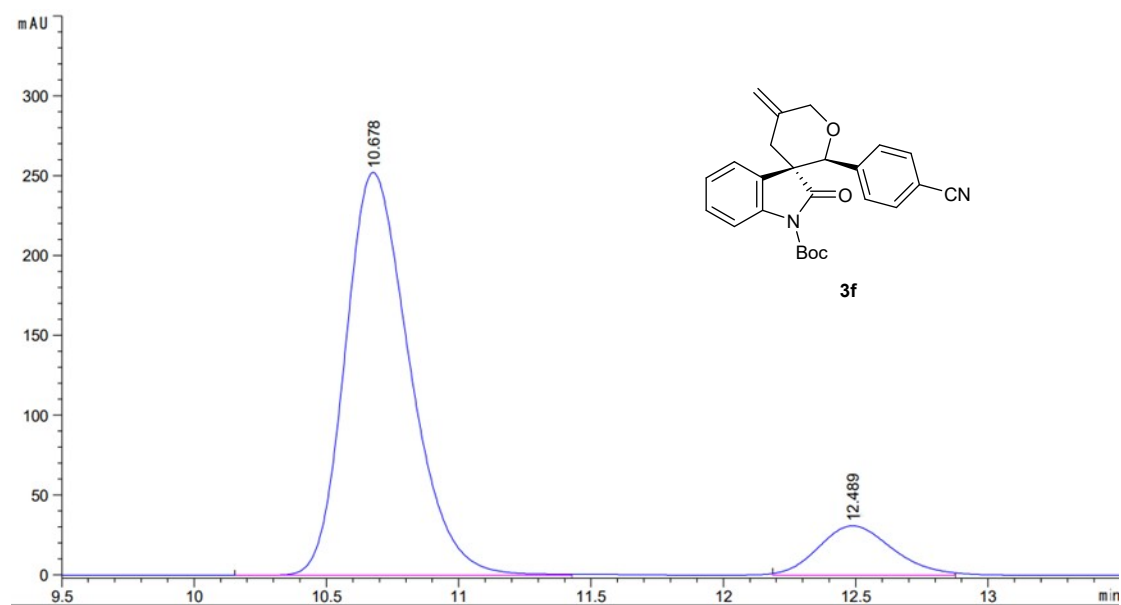

| Peak # | RetTime [min] | Type | Width [min] | Area [mAU*s] | Height [mAU] | Area %  |
|--------|---------------|------|-------------|--------------|--------------|---------|
| 1      | 10.678        | MF   | 0.2819      | 4267.26563   | 252.25377    | 87.6869 |
| 2      | 12.489        | MF   | 0.3235      | 599.21228    | 30.87482     | 12.3131 |

**3g**

racemic:

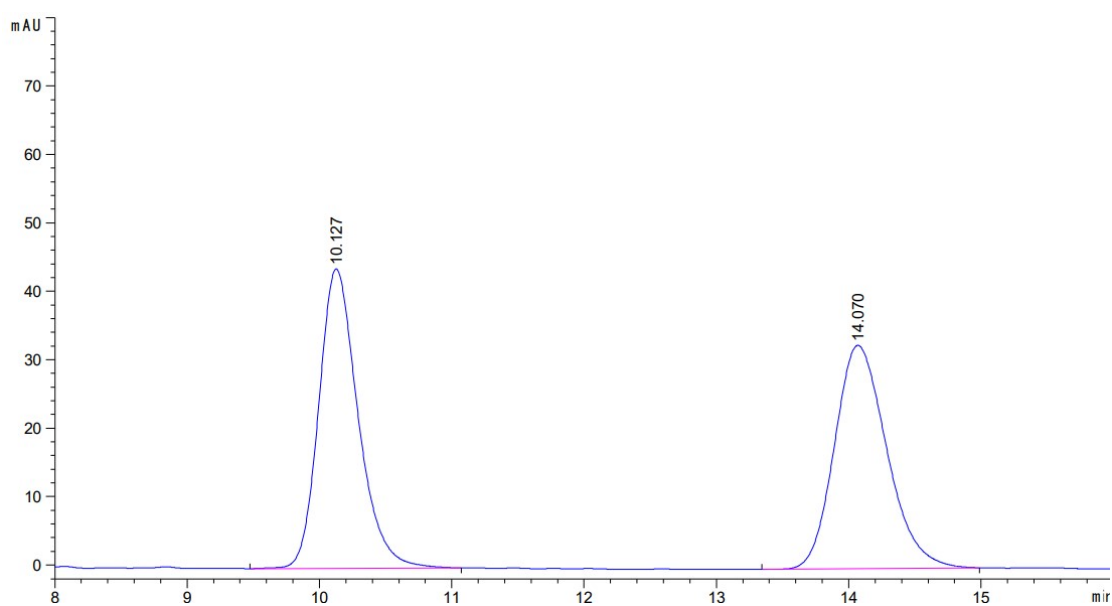

| Peak # | RetTime [min] | Type | Width [min] | Area [mAU*s] | Height [mAU] | Area %  |
|--------|---------------|------|-------------|--------------|--------------|---------|
| 1      | 10.127        | BB   | 0.3135      | 901.66119    | 43.74352     | 50.2035 |
| 2      | 14.070        | BB   | 0.4268      | 894.35260    | 32.62625     | 49.7965 |

chiral:

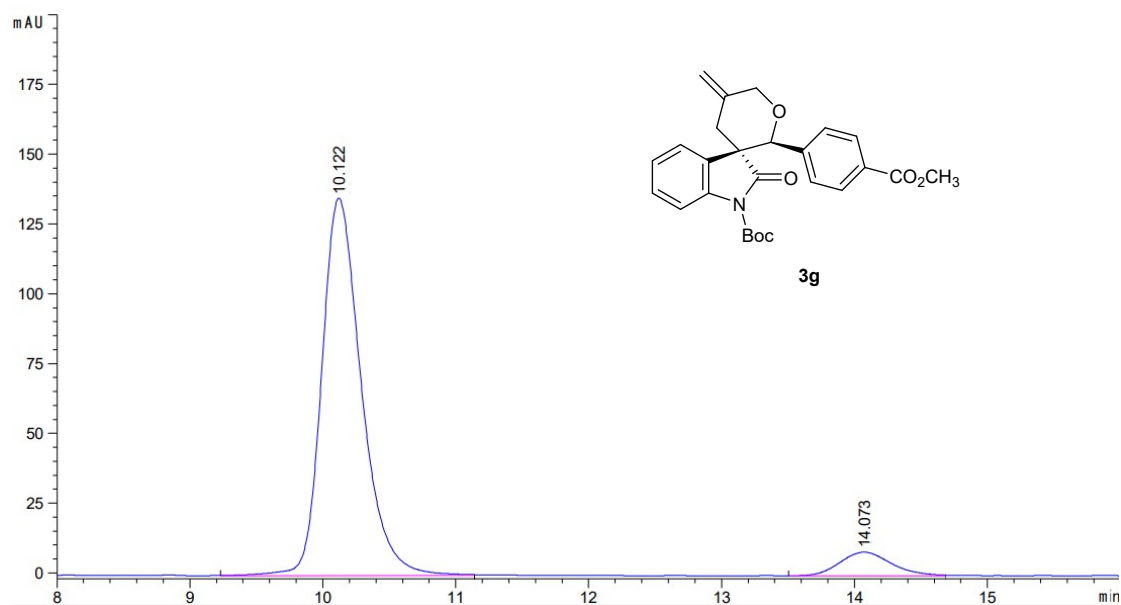

| Peak # | RetTime [min] | Type | Width [min] | Area [mAU*s] | Height [mAU] | Area %  |
|--------|---------------|------|-------------|--------------|--------------|---------|
| 1      | 10.122        | FM   | 0.3447      | 2795.11108   | 135.13371    | 92.5022 |
| 2      | 14.073        | MF   | 0.4462      | 226.55896    | 8.46265      | 7.4978  |

3h

racemic:

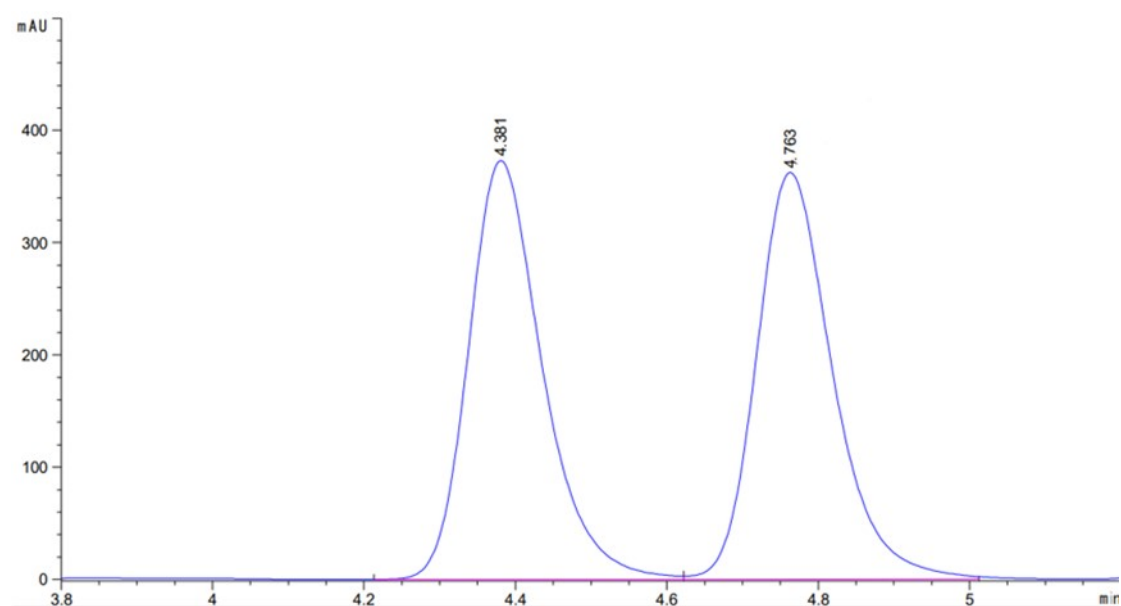



| Peak # | RetTime [min] | Type | Width [min] | Area [mAU*s] | Height [mAU] | Area %  |
|--------|---------------|------|-------------|--------------|--------------|---------|
| 1      | 4.381         | BV   | 0.1030      | 2523.75049   | 372.90582    | 49.9783 |
| 2      | 4.763         | MF   | 0.1161      | 2525.94385   | 362.55124    | 50.0217 |

chiral:

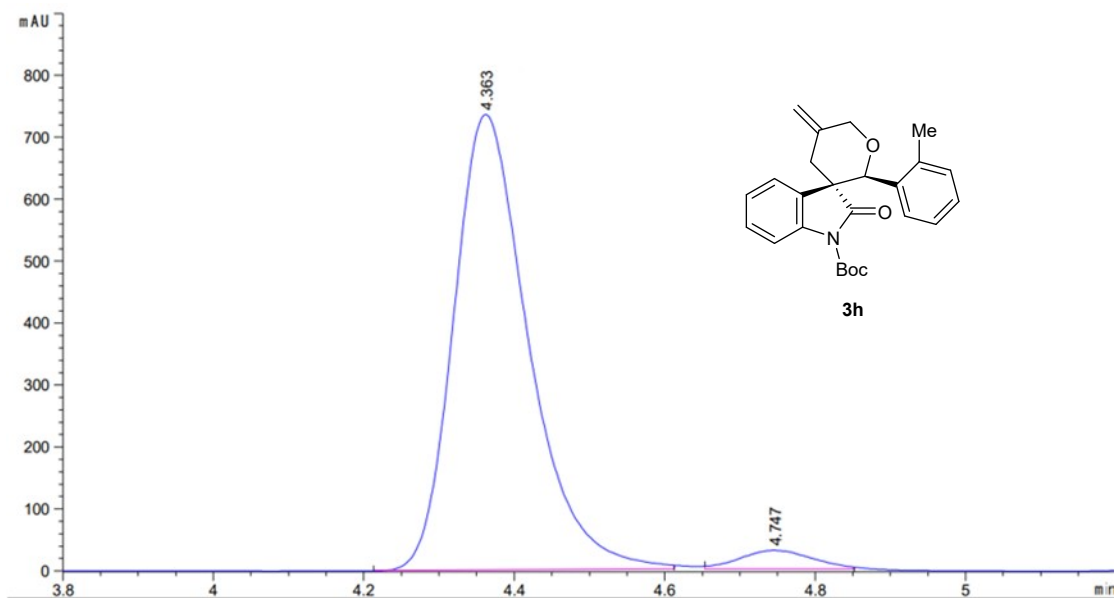

| Peak # | RetTime [min] | Type | Width [min] | Area [mAU*s] | Height [mAU] | Area %  |
|--------|---------------|------|-------------|--------------|--------------|---------|
| 1      | 4.363         | MM   | 0.1150      | 5076.57715   | 735.67627    | 96.1865 |
| 2      | 4.747         | MM   | 0.1114      | 201.27271    | 30.10432     | 3.8135  |

**3i**

racemic:

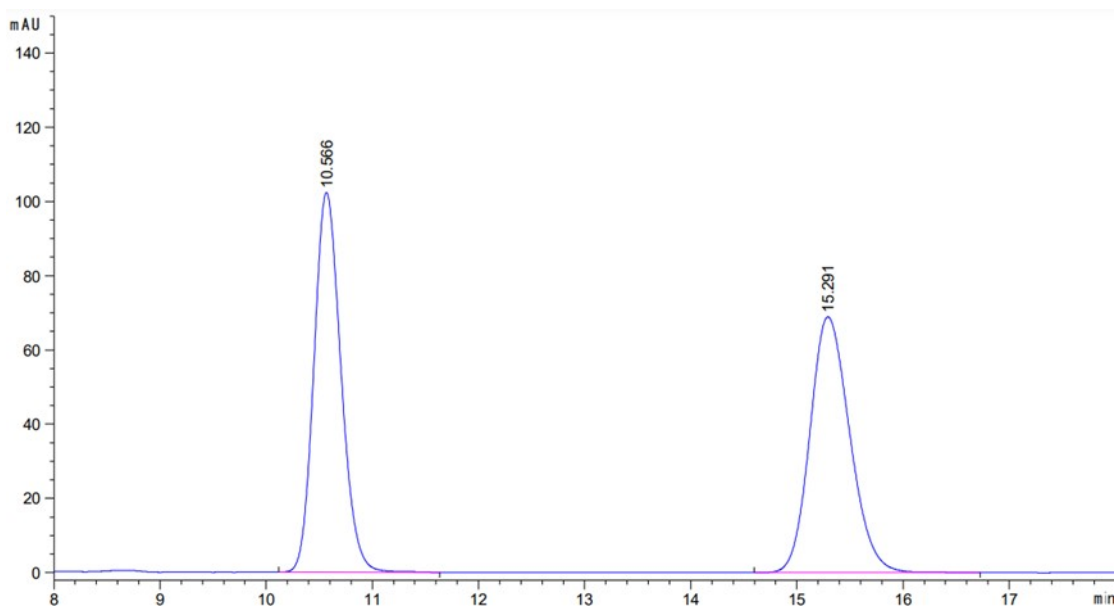

| Peak # | RetTime [min] | Type | Width [min] | Area [mAU*s] | Height [mAU] | Area %  |
|--------|---------------|------|-------------|--------------|--------------|---------|
| 1      | 10.566        | BB   | 0.2728      | 1804.48987   | 102.31963    | 50.1090 |
| 2      | 15.291        | BB   | 0.4031      | 1796.63831   | 68.92859     | 49.8910 |

chiral:

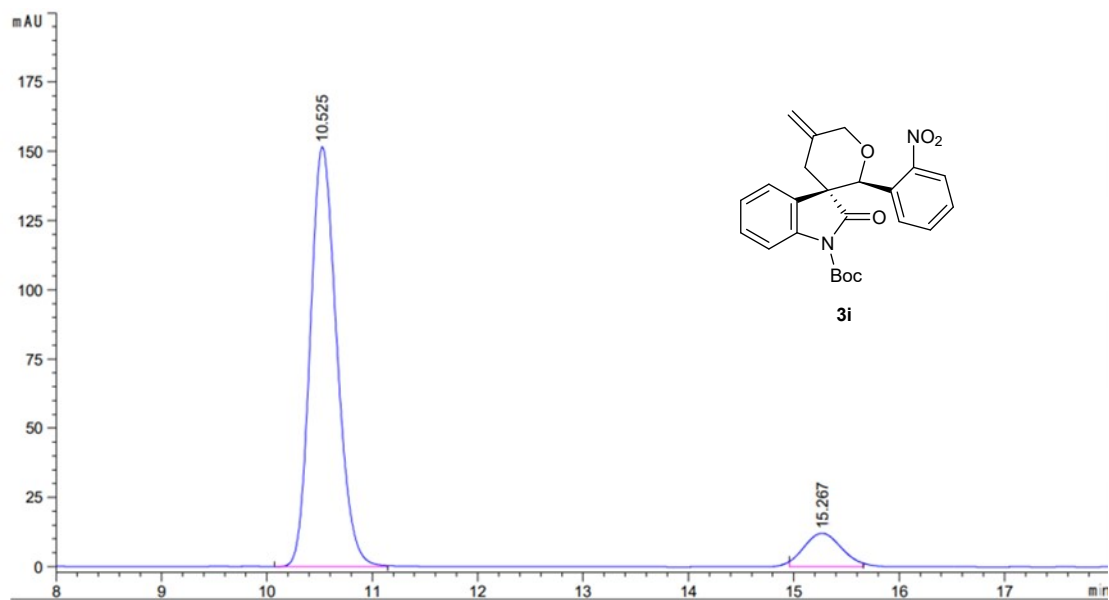

| Peak # | RetTime [min] | Type | Width [min] | Area [mAU*s] | Height [mAU] | Area %  |
|--------|---------------|------|-------------|--------------|--------------|---------|
| 1      | 10.525        | MF   | 0.2907      | 2643.95239   | 151.55995    | 89.9066 |
| 2      | 15.267        | FM   | 0.4084      | 296.82452    | 12.11333     | 10.0934 |

**3j**

racemic:

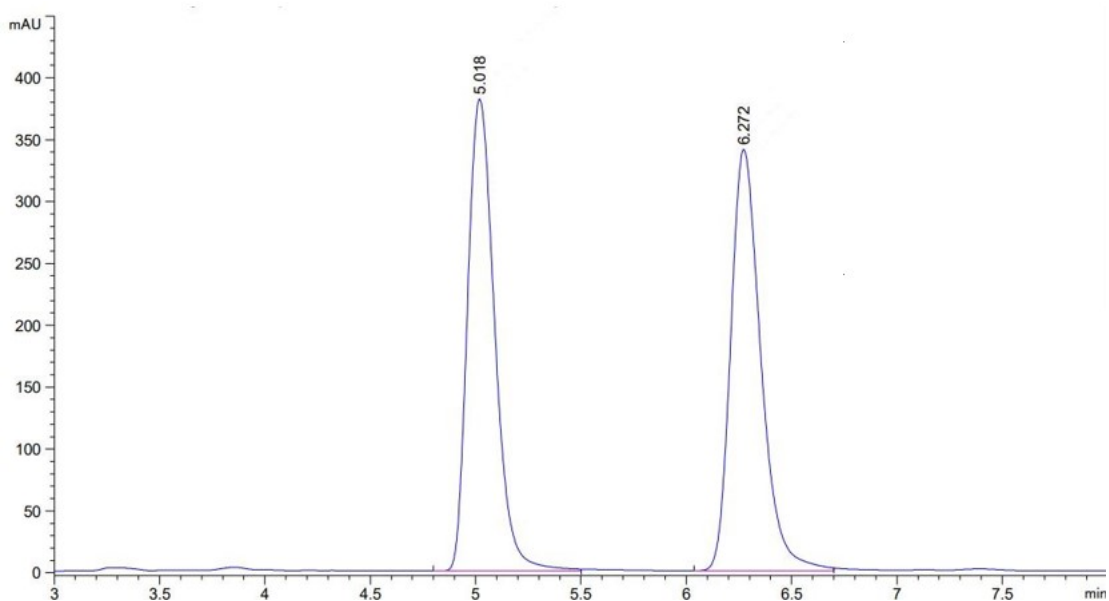

| Peak # | RetTime [min] | Type | Width [min] | Area [mAU*s] | Height [mAU] | Area %  |
|--------|---------------|------|-------------|--------------|--------------|---------|
| 1      | 5.018         | MF   | 0.1484      | 3394.32471   | 381.14948    | 50.0631 |
| 2      | 6.272         | MF   | 0.1657      | 3385.76489   | 340.45746    | 49.9369 |

chiral:

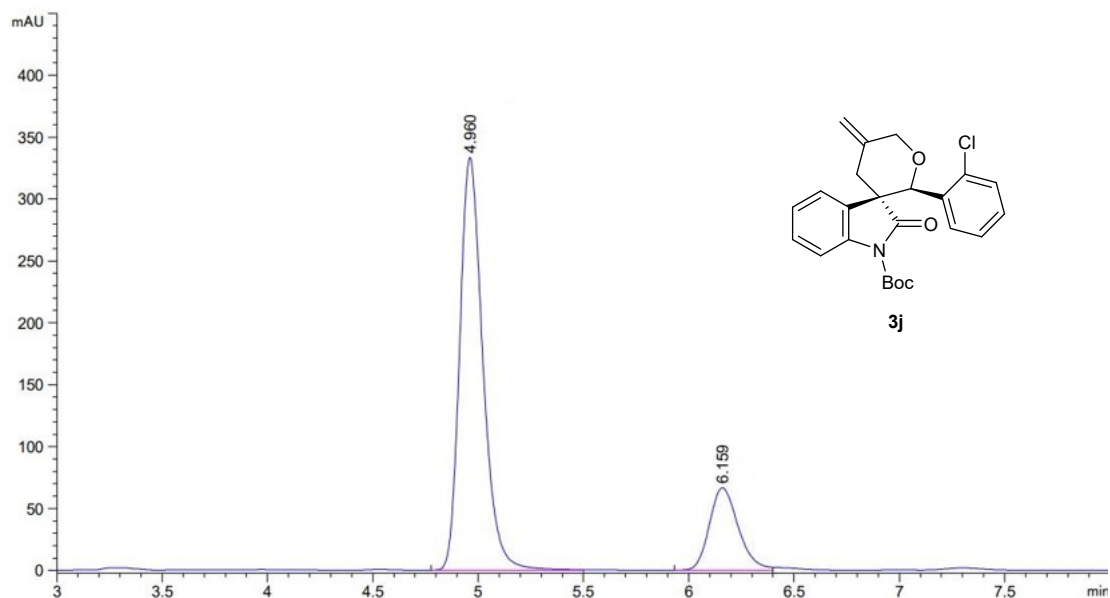

| Peak # | RetTime [min] | Type | Width [min] | Area [mAU*s] | Height [mAU] | Area %  |
|--------|---------------|------|-------------|--------------|--------------|---------|
| 1      | 4.960         | MF   | 0.1269      | 2538.50366   | 333.29126    | 80.0148 |
| 2      | 6.159         | MF   | 0.1590      | 634.04077    | 66.47869     | 19.9852 |

**3k**

racemic:

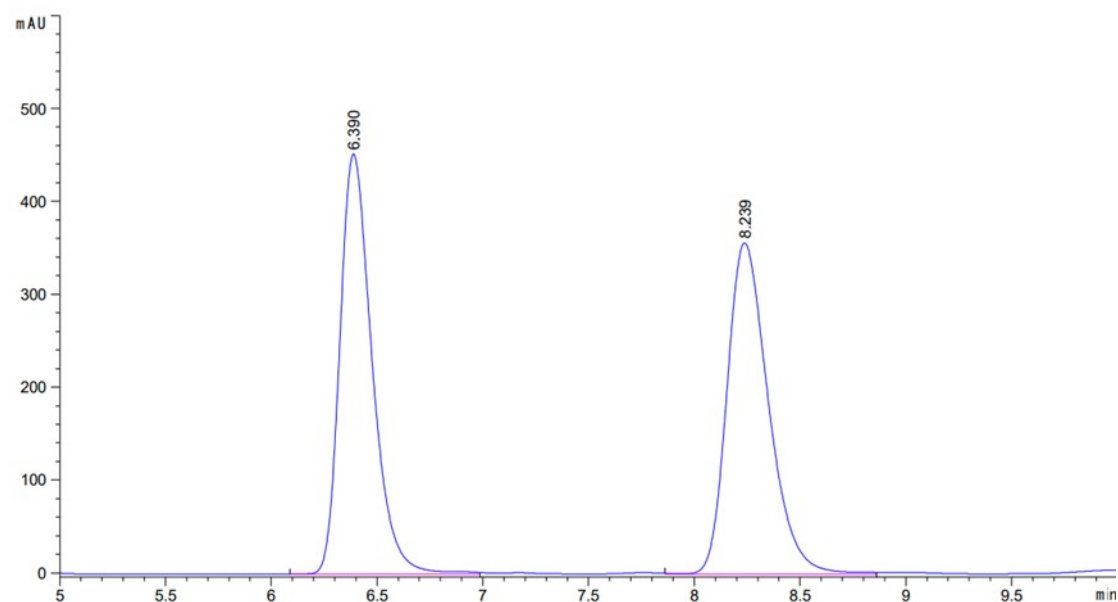

| Peak # | RetTime [min] | Type | Width [min] | Area [mAU*s] | Height [mAU] | Area %  |
|--------|---------------|------|-------------|--------------|--------------|---------|
| 1      | 6.390         | MF   | 0.1759      | 4772.33252   | 452.06946    | 49.6762 |
| 2      | 8.239         | FM   | 0.2263      | 4834.54492   | 356.12601    | 50.3238 |

chiral:  
Method A

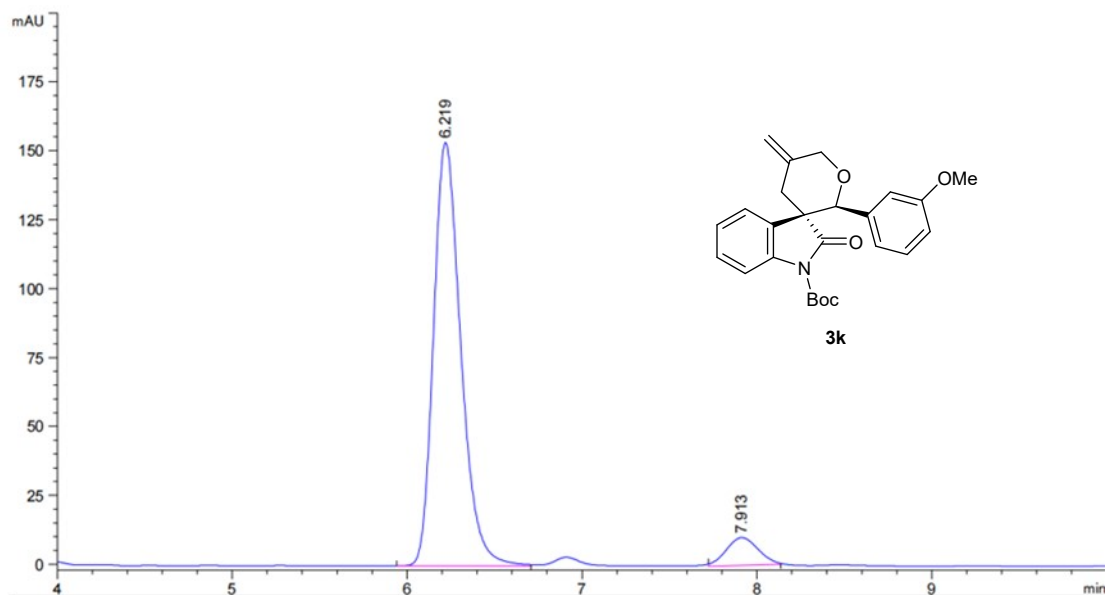

| Peak # | RetTime [min] | Type | Width [min] | Area [mAU*s] | Height [mAU] | Area %  |
|--------|---------------|------|-------------|--------------|--------------|---------|
| 1      | 6.219         | MF   | 0.1803      | 1660.34692   | 153.51534    | 92.8530 |
| 2      | 7.913         | MM   | 0.2116      | 127.79876    | 10.06773     | 7.1470  |

Method B

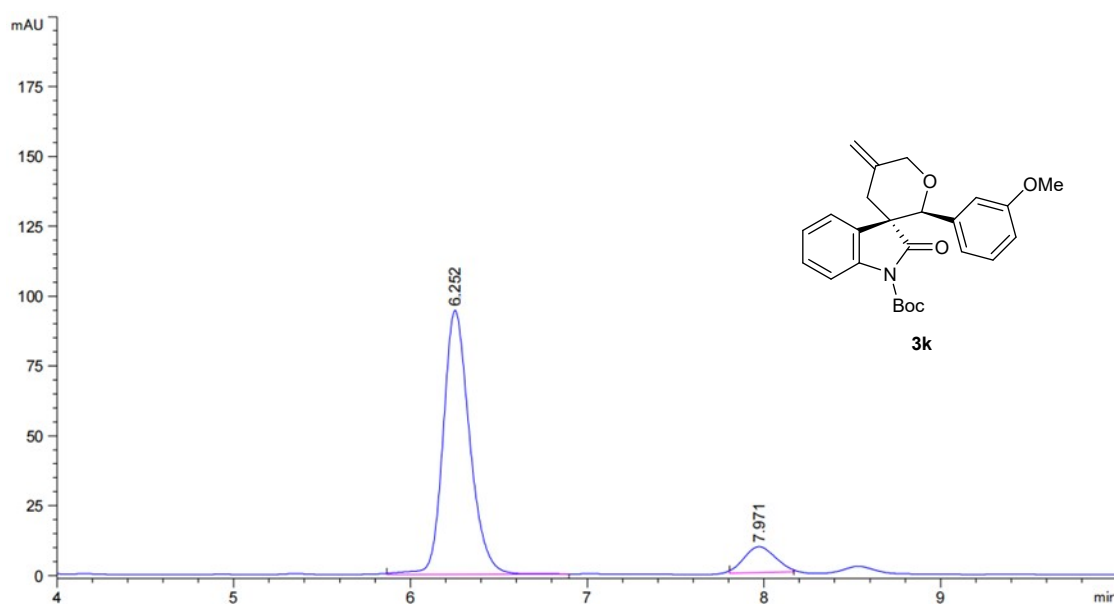

| Peak # | RetTime [min] | Type | Width [min] | Area [mAU*s] | Height [mAU] | Area %  |
|--------|---------------|------|-------------|--------------|--------------|---------|
| 1      | 6.252         | FM   | 0.1737      | 984.78021    | 94.47954     | 89.7507 |
| 2      | 7.971         | MM   | 0.2031      | 112.45901    | 9.23032      | 10.2493 |

### 3I

racemic:

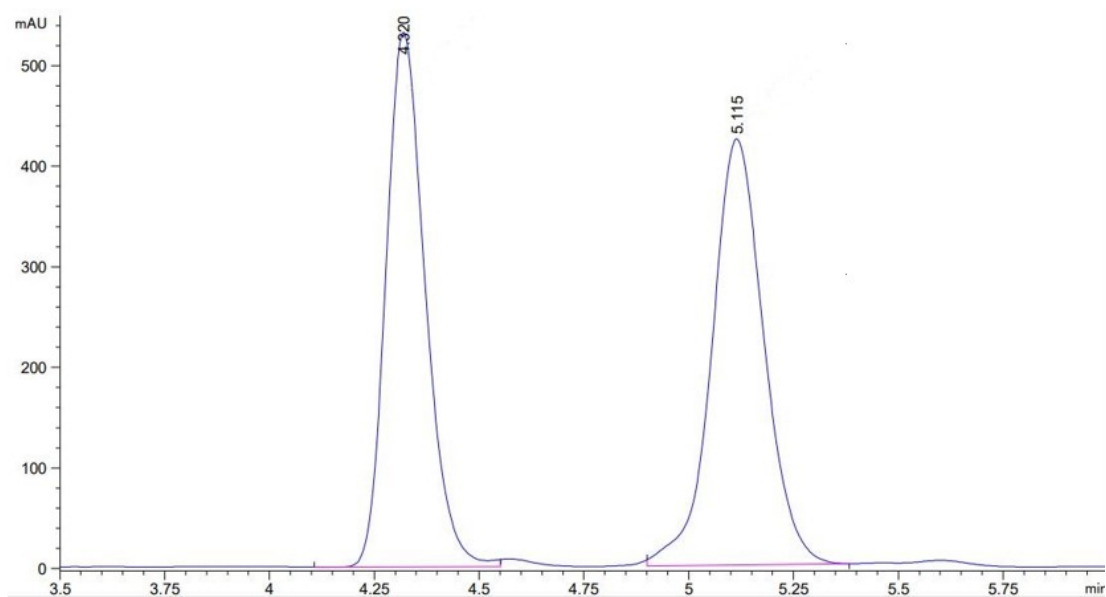

| Peak # | RetTime [min] | Type | Width [min] | Area [mAU*s] | Height [mAU] | Area %  |
|--------|---------------|------|-------------|--------------|--------------|---------|
| 1      | 4.320         | MF   | 0.1087      | 3466.08203   | 531.61023    | 48.6680 |
| 2      | 5.115         | FM   | 0.1438      | 3655.80835   | 423.76486    | 51.3320 |

chiral:

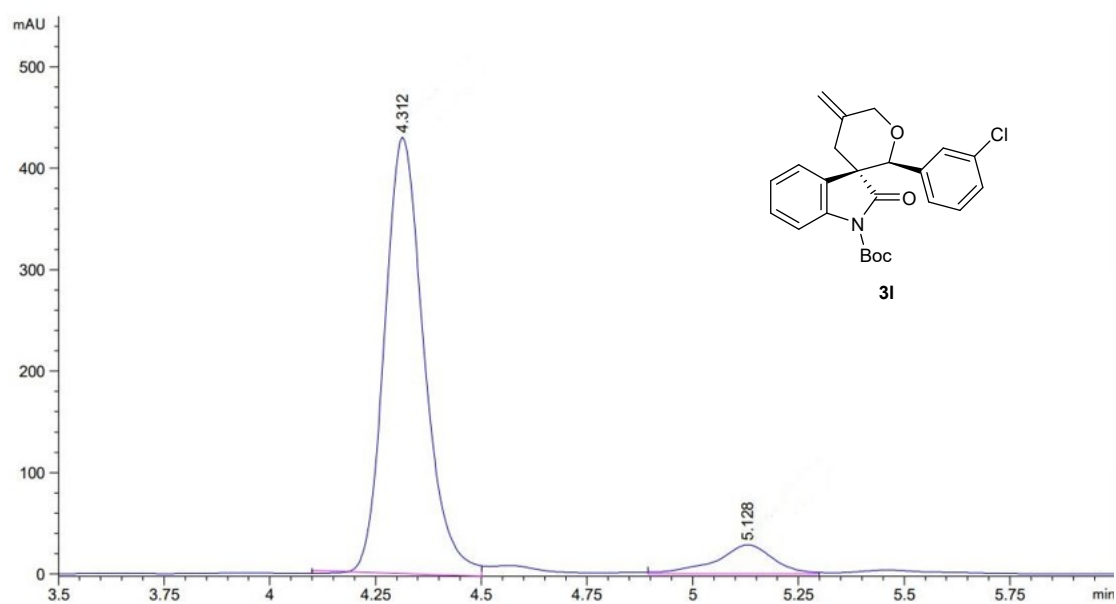

| Peak # | RetTime [min] | Type | Width [min] | Area [mAU*s] | Height [mAU] | Area %  |
|--------|---------------|------|-------------|--------------|--------------|---------|
| 1      | 4.312         | MF   | 0.1079      | 2783.65063   | 430.07074    | 91.2482 |
| 2      | 5.128         | MF   | 0.1566      | 266.98697    | 28.42067     | 8.7518  |

### 3m

racemic:

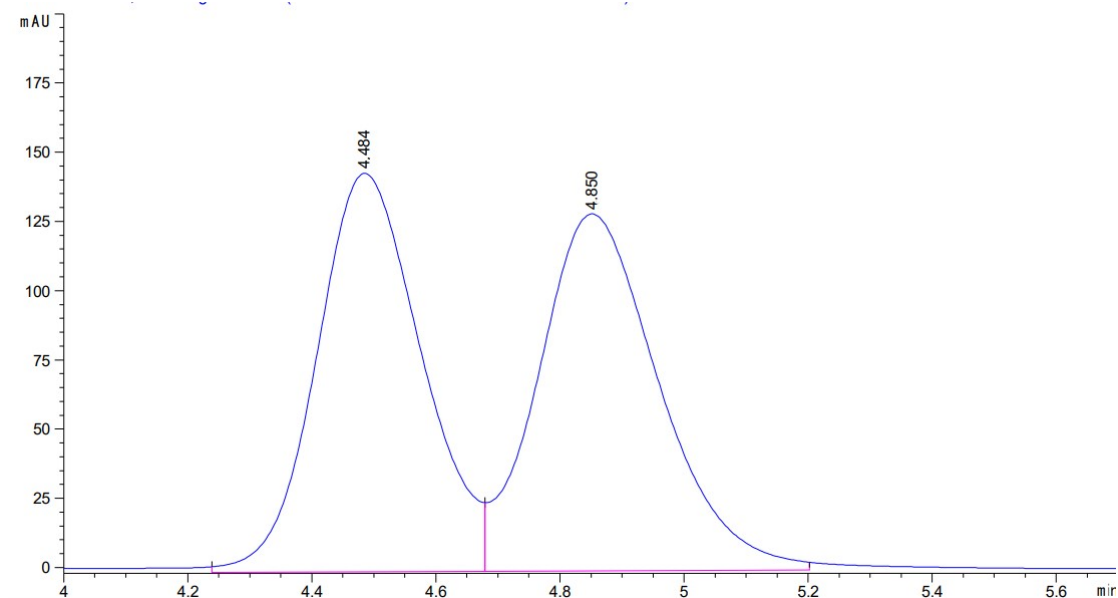

| Peak # | RetTime [min] | Type | Width [min] | Area [mAU*s] | Height [mAU] | Area %  |
|--------|---------------|------|-------------|--------------|--------------|---------|
| 1      | 4.484         | FM   | 0.1959      | 1691.66370   | 143.92958    | 49.3367 |
| 2      | 4.850         | MF   | 0.2246      | 1737.15332   | 128.92233    | 50.6633 |

chiral:

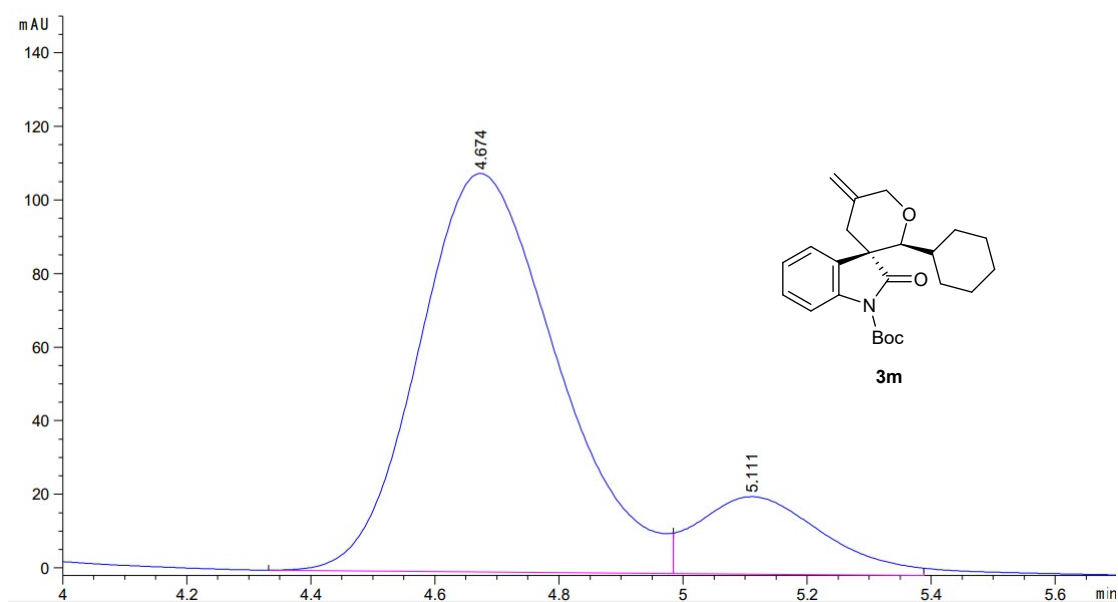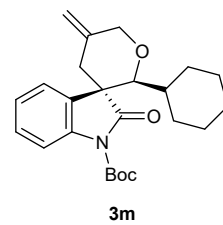

| Peak # | RetTime [min] | Type | Width [min] | Area [mAU*s] | Height [mAU] | Area %  |
|--------|---------------|------|-------------|--------------|--------------|---------|
| 1      | 4.674         | MF   | 0.2582      | 1676.73083   | 108.24329    | 85.1371 |
| 2      | 5.111         | MF   | 0.2325      | 292.71674    | 20.98120     | 14.8629 |

### 3n

racemic:

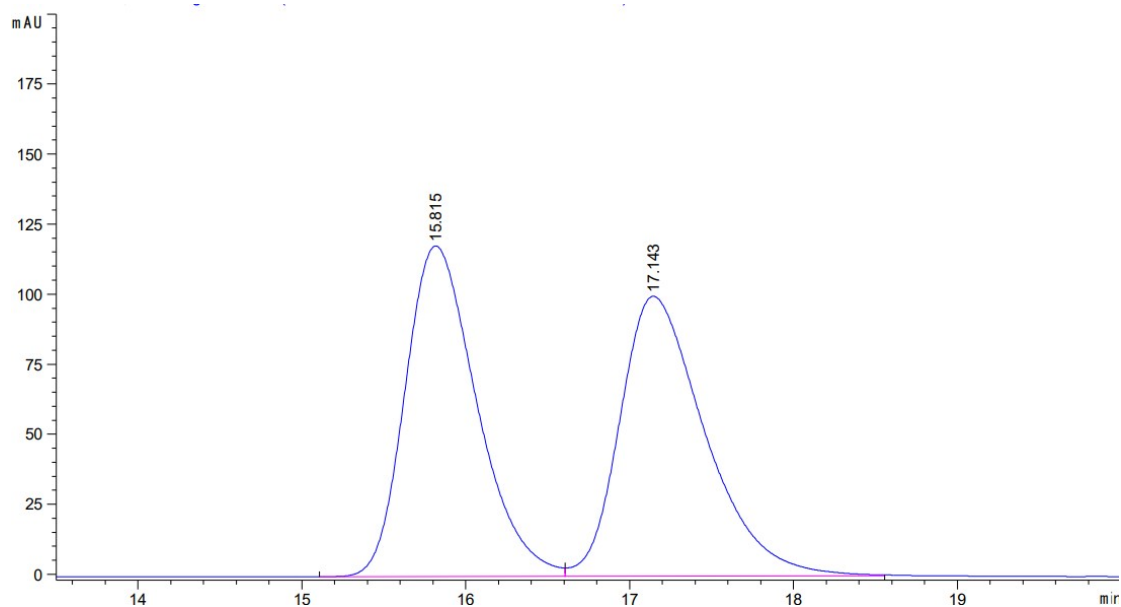

| Peak # | RetTime [min] | Type | Width [min] | Area [mAU*s] | Height [mAU] | Area %  |
|--------|---------------|------|-------------|--------------|--------------|---------|
| 1      | 15.815        | FM   | 0.5063      | 3586.72461   | 118.06325    | 49.8241 |
| 2      | 17.143        | MF   | 0.6022      | 3612.05396   | 99.96513     | 50.1759 |

chiral:

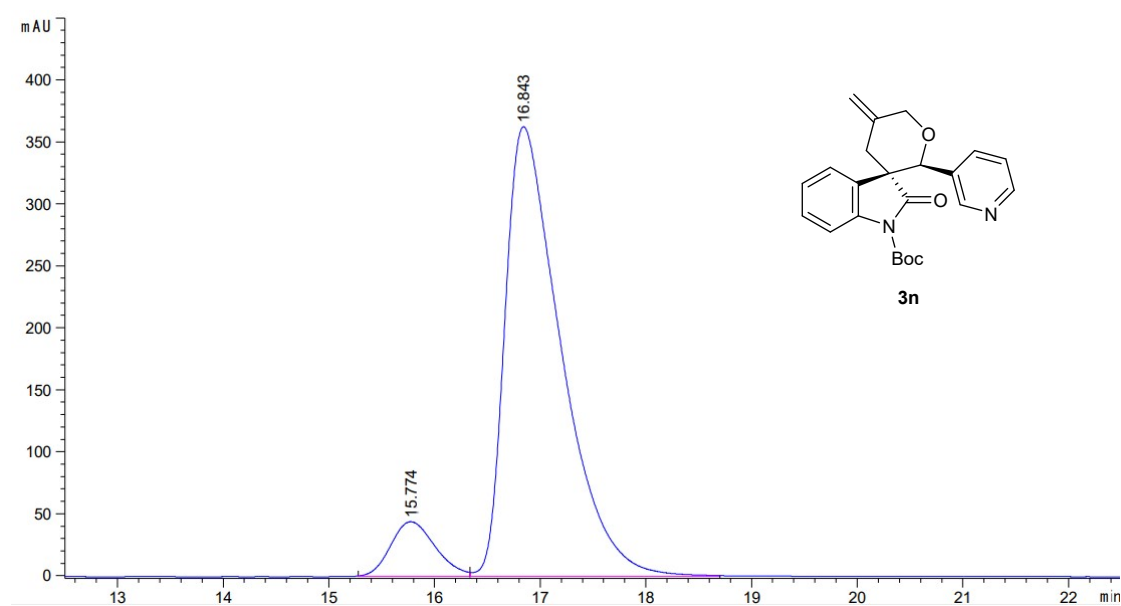

| Peak # | RetTime [min] | Type | Width [min] | Area [mAU*s] | Height [mAU] | Area %  |
|--------|---------------|------|-------------|--------------|--------------|---------|
| 1      | 15.774        | FM   | 0.4903      | 1304.78638   | 44.35469     | 8.9091  |
| 2      | 16.843        | MF   | 0.6127      | 1.33408e4    | 362.91104    | 91.0909 |

### 3o

racemic:

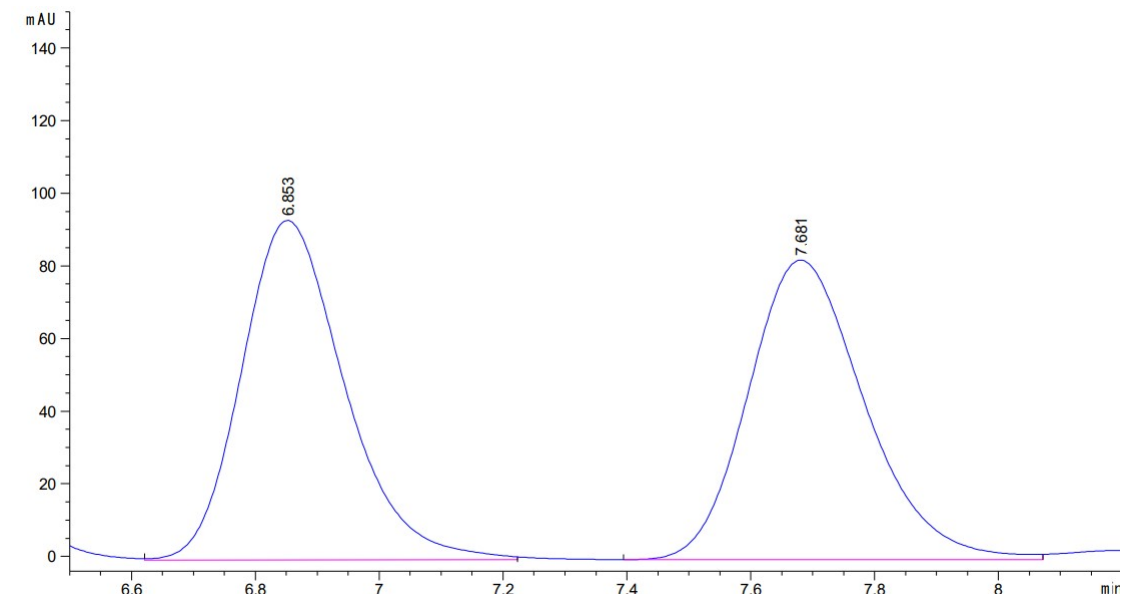

| Peak # | RetTime [min] | Type | Width [min] | Area [mAU*s] | Height [mAU] | Area %  |
|--------|---------------|------|-------------|--------------|--------------|---------|
| 1      | 6.853         | MF   | 0.1926      | 1080.77502   | 93.51992     | 50.0747 |
| 2      | 7.681         | MF   | 0.2177      | 1077.55017   | 82.50919     | 49.9253 |

chiral:

Method A

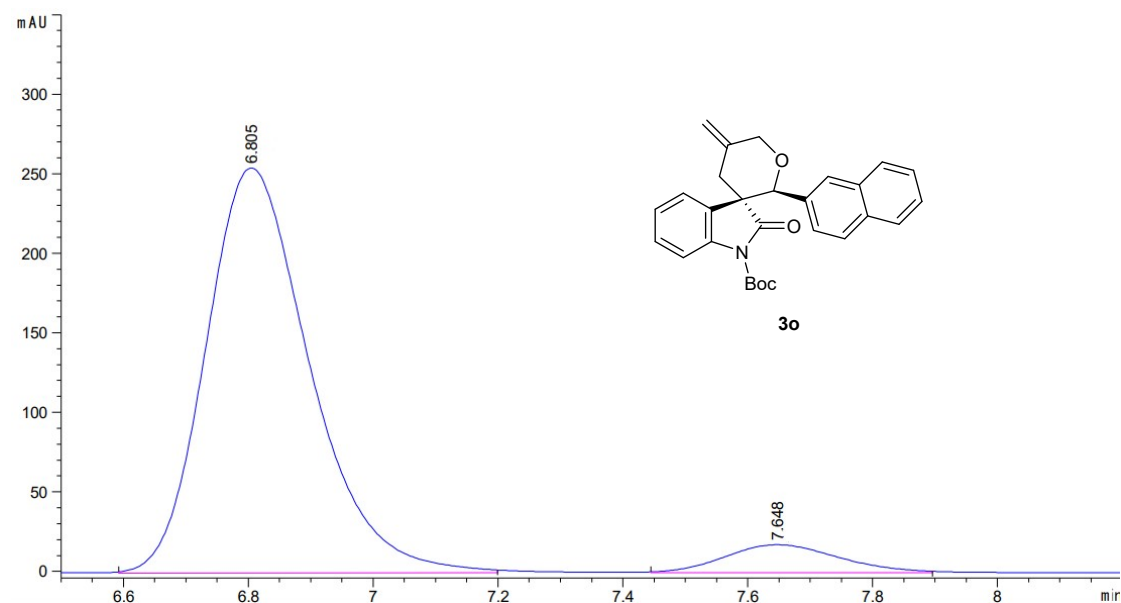



| Peak # | RetTime [min] | Type | Width [min] | Area [mAU*s] | Height [mAU] | Area %  |
|--------|---------------|------|-------------|--------------|--------------|---------|
| 1      | 6.805         | FM   | 0.1923      | 2938.55200   | 254.70947    | 92.9167 |
| 2      | 7.648         | MF   | 0.2124      | 224.01491    | 17.57987     | 7.0833  |

### Method B

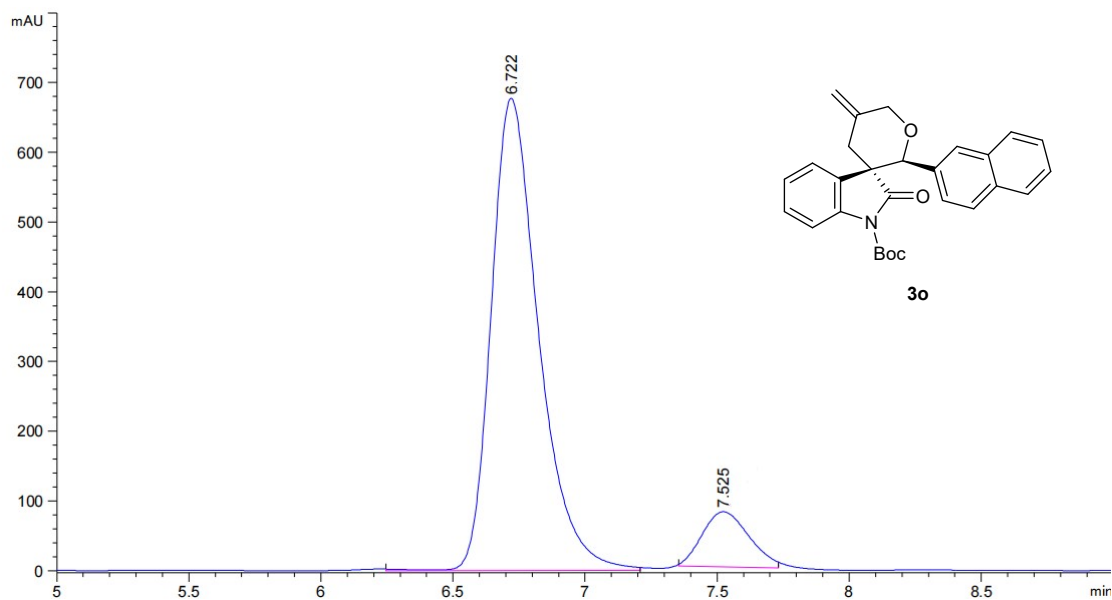

| Peak # | RetTime [min] | Type | Width [min] | Area [mAU*s] | Height [mAU] | Area %  |
|--------|---------------|------|-------------|--------------|--------------|---------|
| 1      | 6.722         | FM   | 0.2081      | 8452.79004   | 677.01843    | 89.7647 |
| 2      | 7.525         | MF   | 0.2039      | 963.81470    | 78.78664     | 10.2353 |

### 3p

racemic:

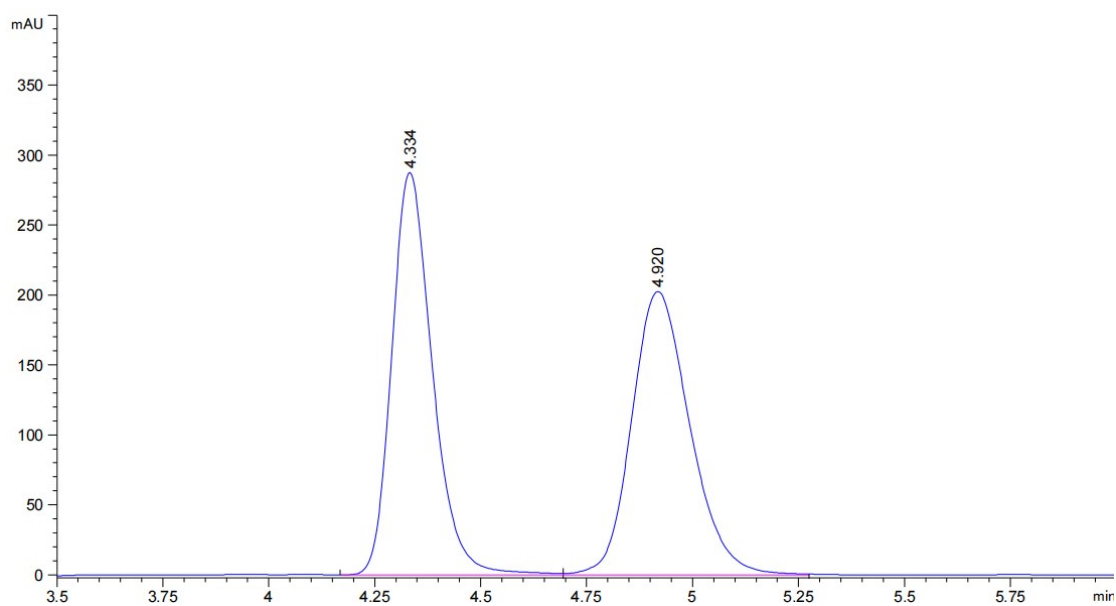

| Peak # | RetTime [min] | Type | Width [min] | Area [mAU*s] | Height [mAU] | Area %  |
|--------|---------------|------|-------------|--------------|--------------|---------|
| 1      | 4.334         | BV   | 0.1016      | 1913.91492   | 287.58292    | 49.7356 |
| 2      | 4.920         | MF   | 0.1591      | 1934.26672   | 202.67398    | 50.2644 |

chiral:

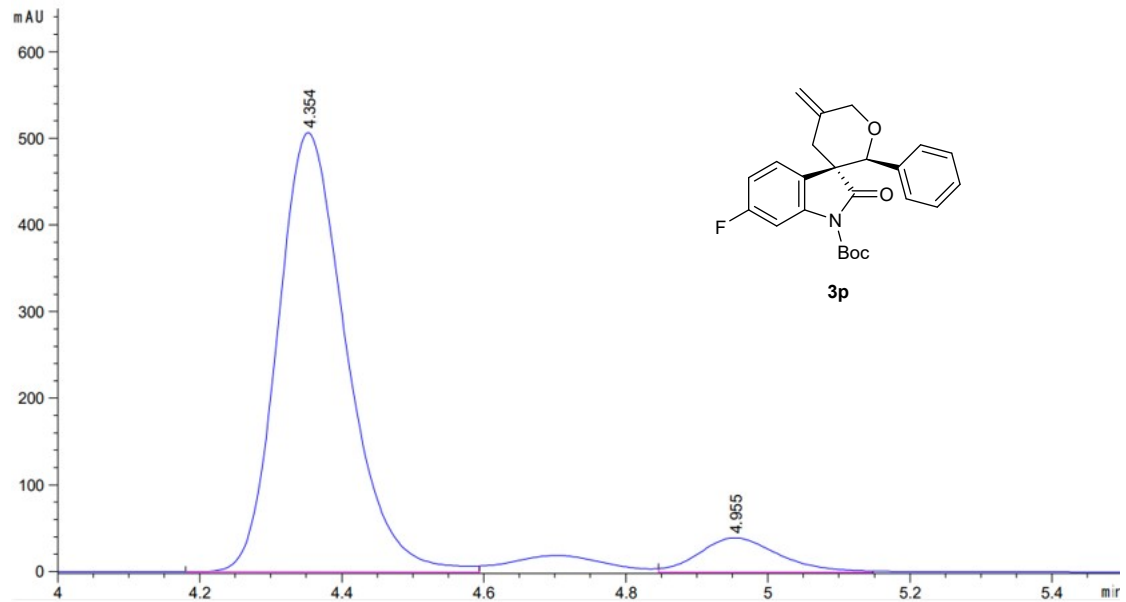

| Peak # | RetTime [min] | Type | Width [min] | Area [mAU*s] | Height [mAU] | Area %  |
|--------|---------------|------|-------------|--------------|--------------|---------|
| 1      | 4.354         | MF   | 0.1115      | 3390.38428   | 506.95749    | 91.8004 |
| 2      | 4.955         | MF   | 0.1288      | 302.82993    | 39.19435     | 8.1996  |

**3q**

racemic:

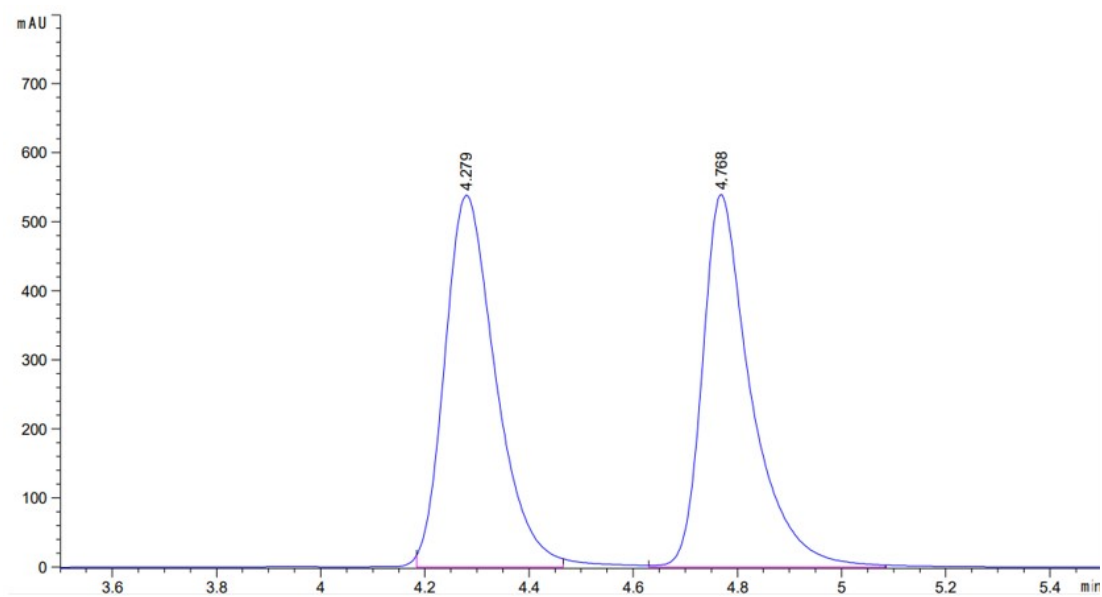

| Peak # | RetTime [min] | Type | Width [min] | Area [mAU*s] | Height [mAU] | Area %  |
|--------|---------------|------|-------------|--------------|--------------|---------|
| 1      | 4.279         | FM   | 0.1127      | 3642.46069   | 538.86841    | 50.9848 |
| 2      | 4.768         | MF   | 0.1080      | 3501.74316   | 540.24469    | 49.0152 |

chiral:

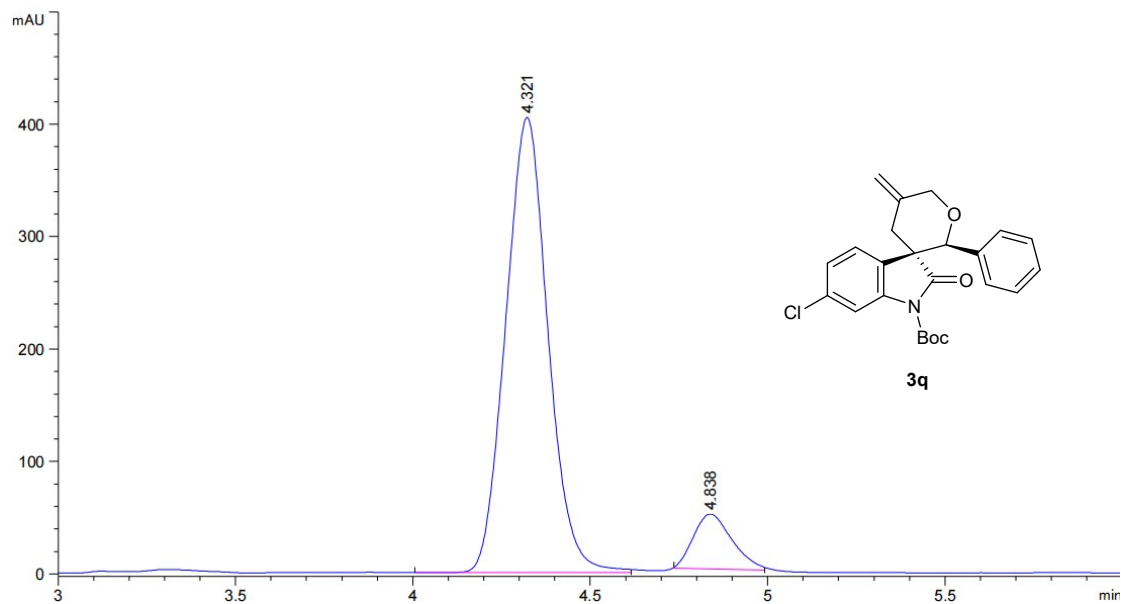

| Peak # | RetTime [min] | Type | Width [min] | Area [mAU*s] | Height [mAU] | Area %  |
|--------|---------------|------|-------------|--------------|--------------|---------|
| 1      | 4.321         | MF   | 0.1380      | 3352.76489   | 404.91397    | 90.1157 |
| 2      | 4.838         | FM   | 0.1257      | 367.74765    | 48.75218     | 9.8843  |

**3r**

racemic:

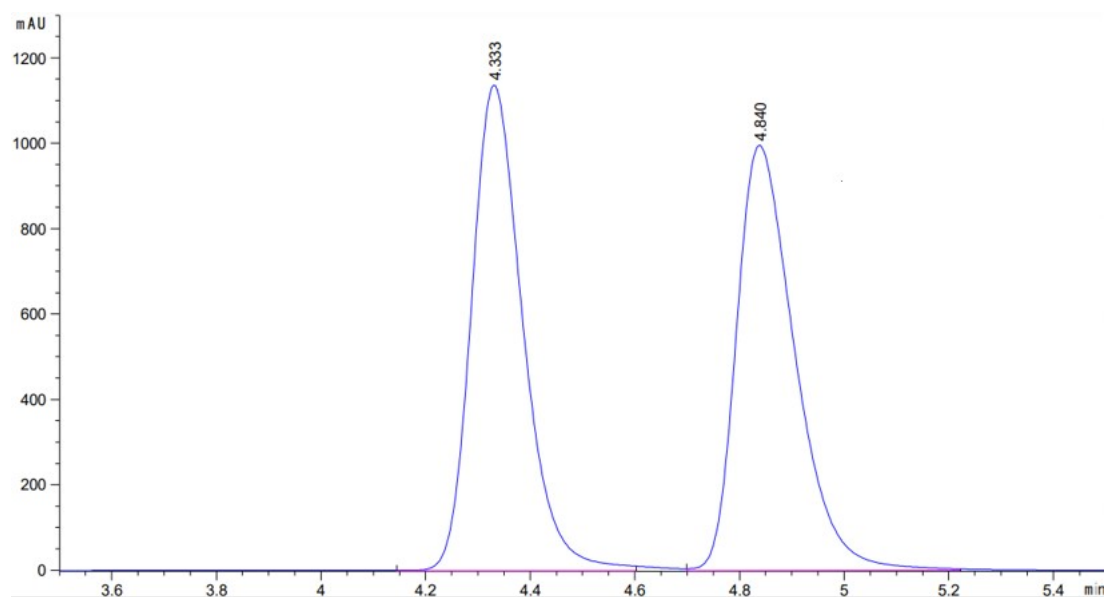

| Peak # | RetTime [min] | Type | Width [min] | Area [mAU*s] | Height [mAU] | Area %  |
|--------|---------------|------|-------------|--------------|--------------|---------|
| 1      | 4.333         | MF   | 0.1133      | 7734.58838   | 1137.72021   | 50.0703 |
| 2      | 4.840         | MF   | 0.1290      | 7712.86328   | 996.29578    | 49.9297 |

chrial:  
Method A

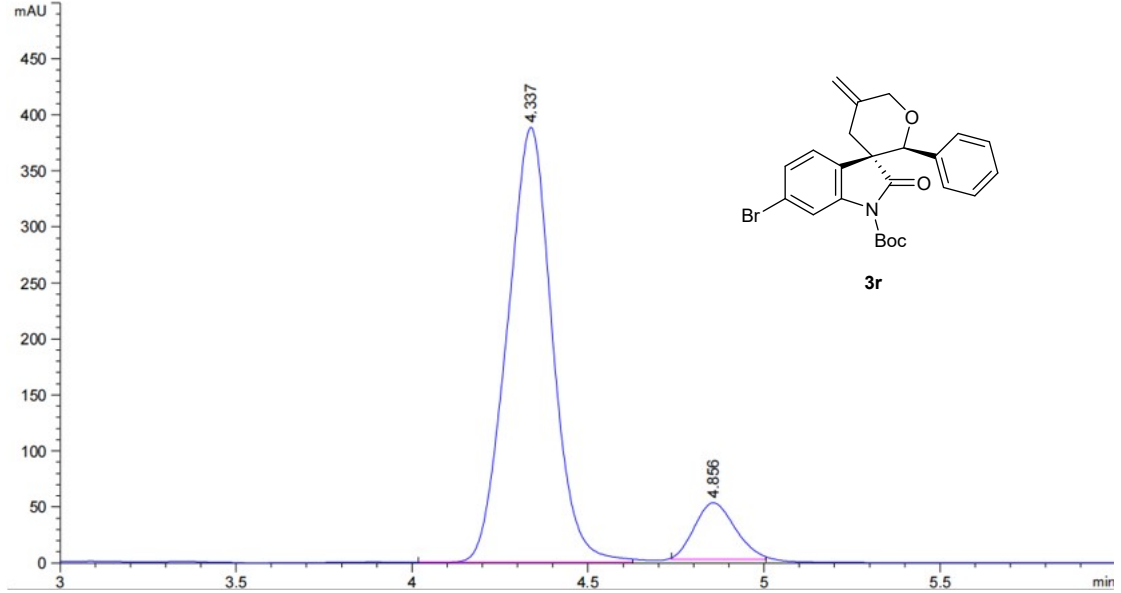

| Peak # | RetTime [min] | Type | Width [min] | Area [mAU*s] | Height [mAU] | Area %  |
|--------|---------------|------|-------------|--------------|--------------|---------|
| 1      | 4.337         | MM   | 0.1453      | 3362.88330   | 385.71609    | 89.7244 |
| 2      | 4.856         | MF   | 0.1298      | 385.13297    | 49.46754     | 10.2756 |

Method B

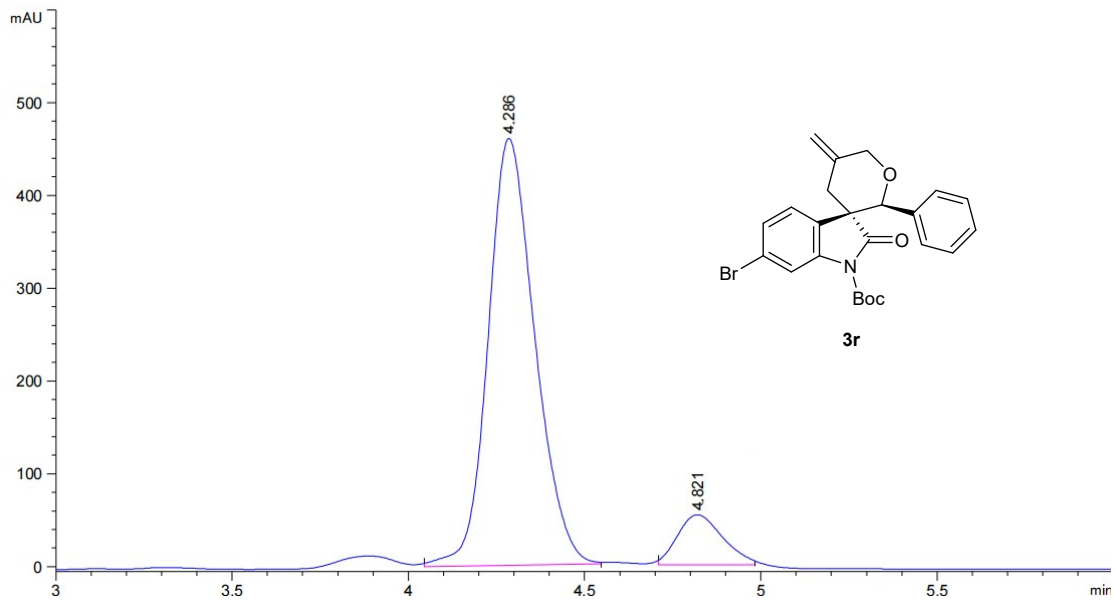

| Peak # | RetTime [min] | Type | Width [min] | Area [mAU*s] | Height [mAU] | Area %  |
|--------|---------------|------|-------------|--------------|--------------|---------|
| 1      | 4.286         | MM   | 0.1534      | 4235.17236   | 460.00714    | 89.8424 |
| 2      | 4.821         | MM   | 0.1482      | 478.83002    | 53.84668     | 10.1576 |

**3t**  
racemic:

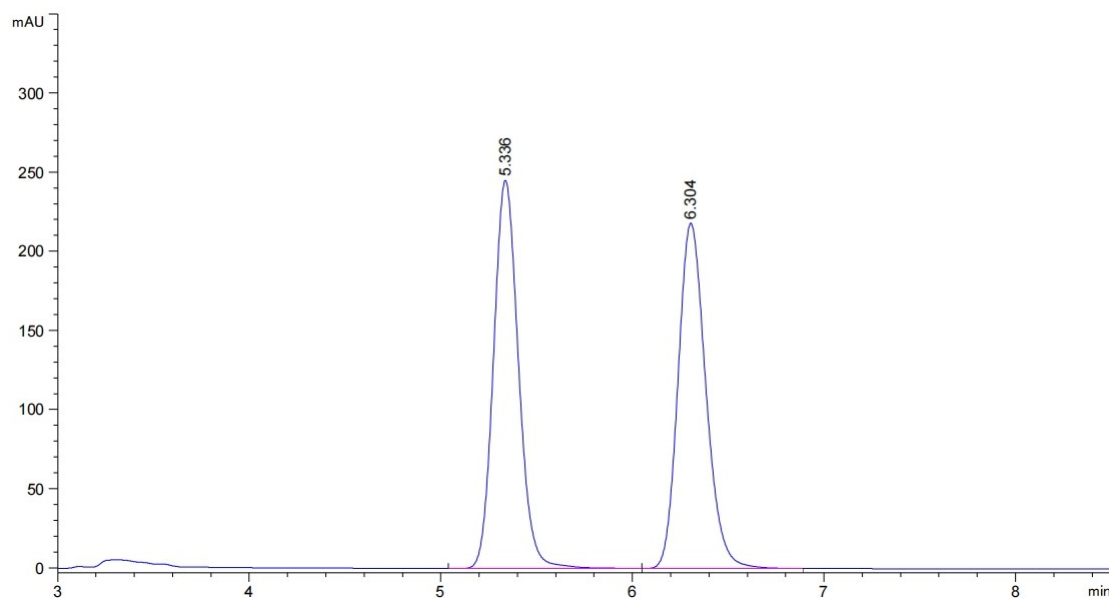

| Peak # | RetTime [min] | Type | Width [min] | Area [mAU*s] | Height [mAU] | Area %  |
|--------|---------------|------|-------------|--------------|--------------|---------|
| 1      | 5.336         | BB   | 0.1402      | 2211.37769   | 245.35794    | 50.1717 |
| 2      | 6.304         | BB   | 0.1555      | 2196.23975   | 218.14024    | 49.8283 |

chiral:

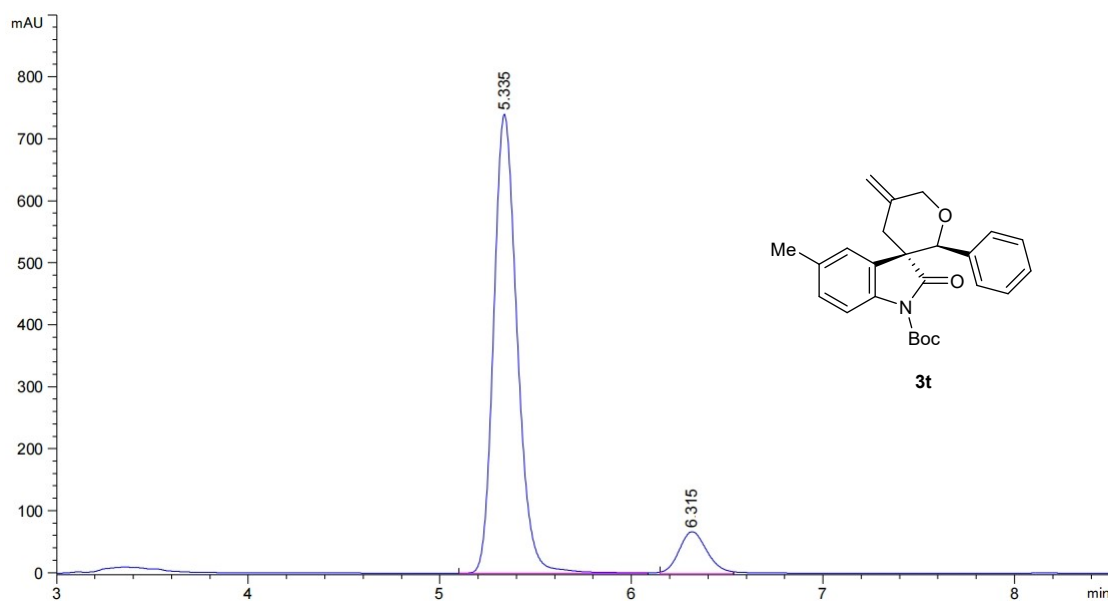

| Peak # | RetTime [min] | Type | Width [min] | Area [mAU*s] | Height [mAU] | Area %  |
|--------|---------------|------|-------------|--------------|--------------|---------|
| 1      | 5.335         | BV   | 0.1310      | 6278.23535   | 740.13330    | 89.9620 |
| 2      | 6.315         | MF   | 0.1711      | 700.52844    | 68.24059     | 10.0380 |

### 3w

racemic:

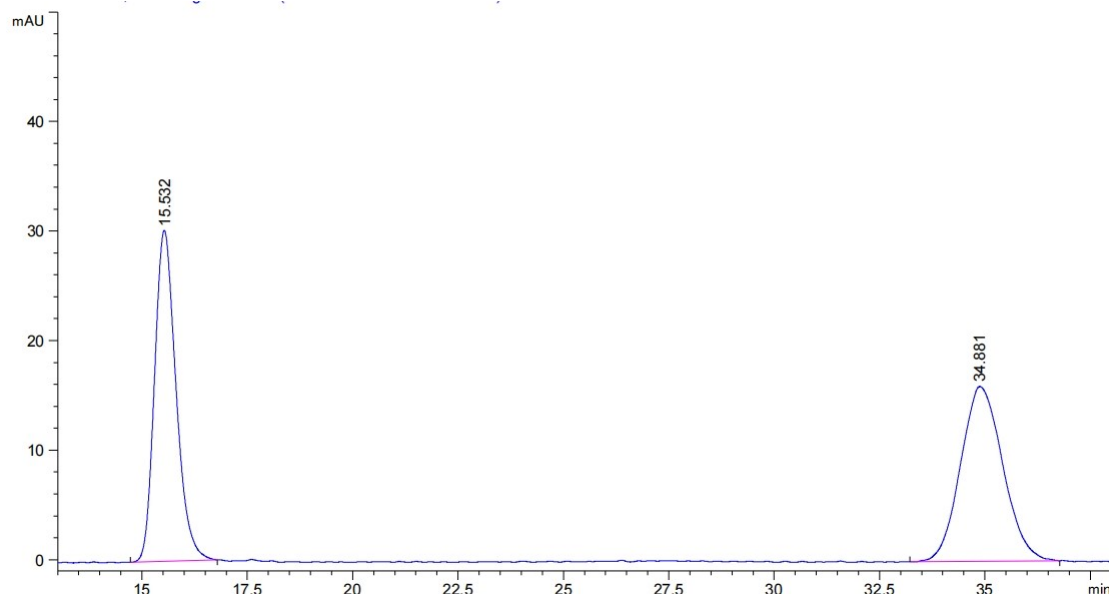

| Peak # | RetTime [min] | Type | Width [min] | Area [mAU*s] | Height [mAU] | Area %  |
|--------|---------------|------|-------------|--------------|--------------|---------|
| 1      | 15.532        | BB   | 0.5410      | 1067.05676   | 30.21641     | 49.0000 |
| 2      | 34.881        | BB   | 1.0302      | 1110.60901   | 15.95357     | 51.0000 |

chiral:

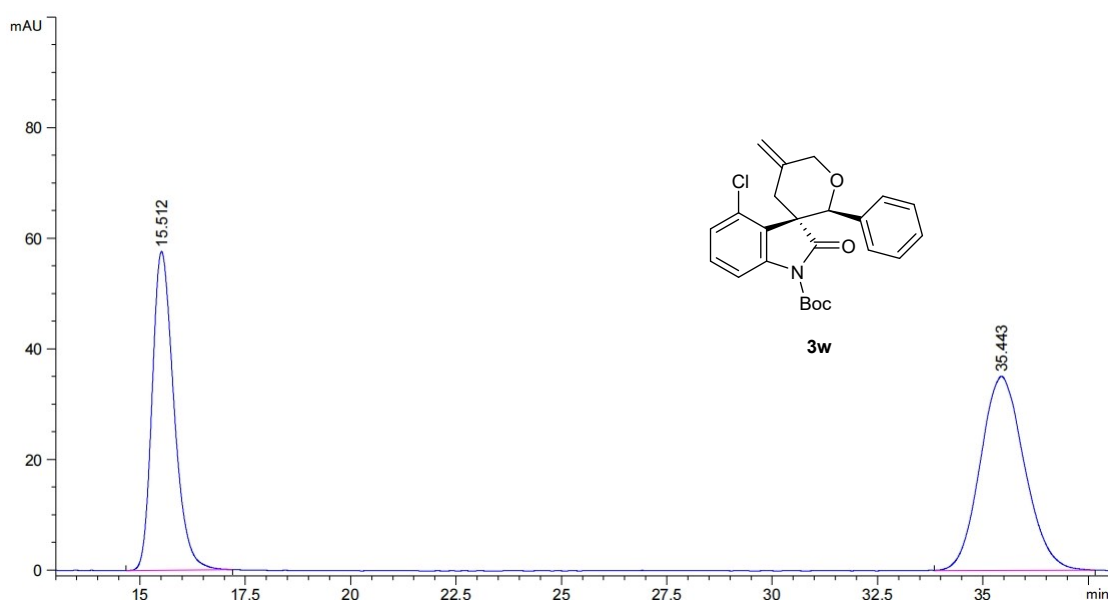

| Peak # | RetTime [min] | Type | Width [min] | Area [mAU*s] | Height [mAU] | Area %  |
|--------|---------------|------|-------------|--------------|--------------|---------|
| 1      | 15.512        | BB   | 0.5561      | 2070.10693   | 57.62291     | 44.7898 |
| 2      | 35.443        | BB   | 1.0853      | 2551.72290   | 35.05412     | 55.2102 |

**3x**  
racemic:

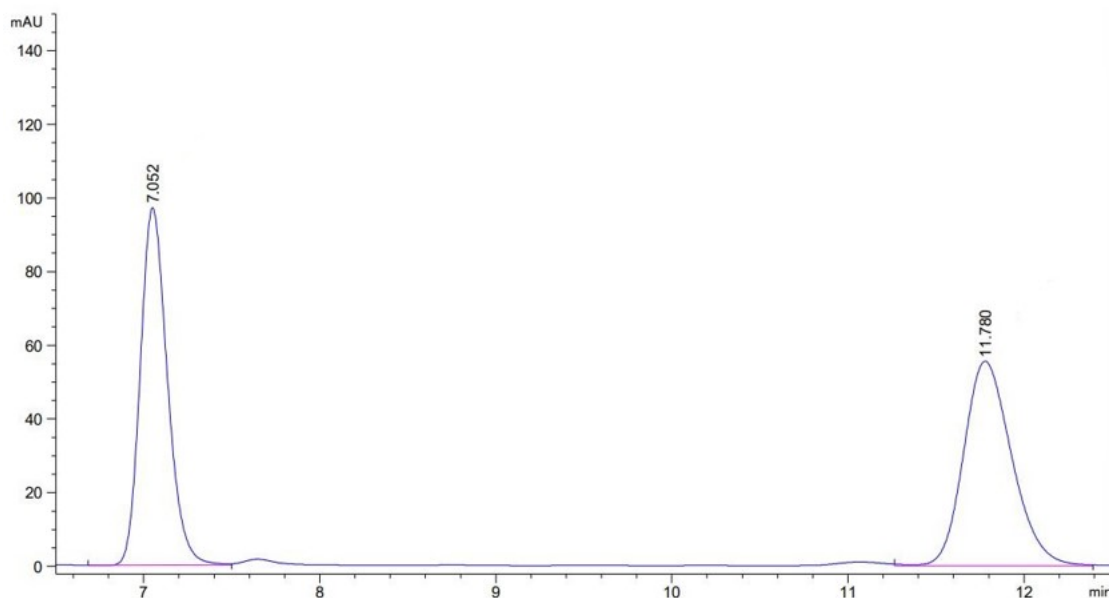

| Peak # | RetTime [min] | Type | Width [min] | Area [mAU*s] | Height [mAU] | Area %  |
|--------|---------------|------|-------------|--------------|--------------|---------|
| 1      | 7.052         | MF   | 0.1781      | 1037.28943   | 97.06059     | 49.6258 |
| 2      | 11.780        | FM   | 0.3164      | 1052.93311   | 55.46993     | 50.3742 |

chiral:

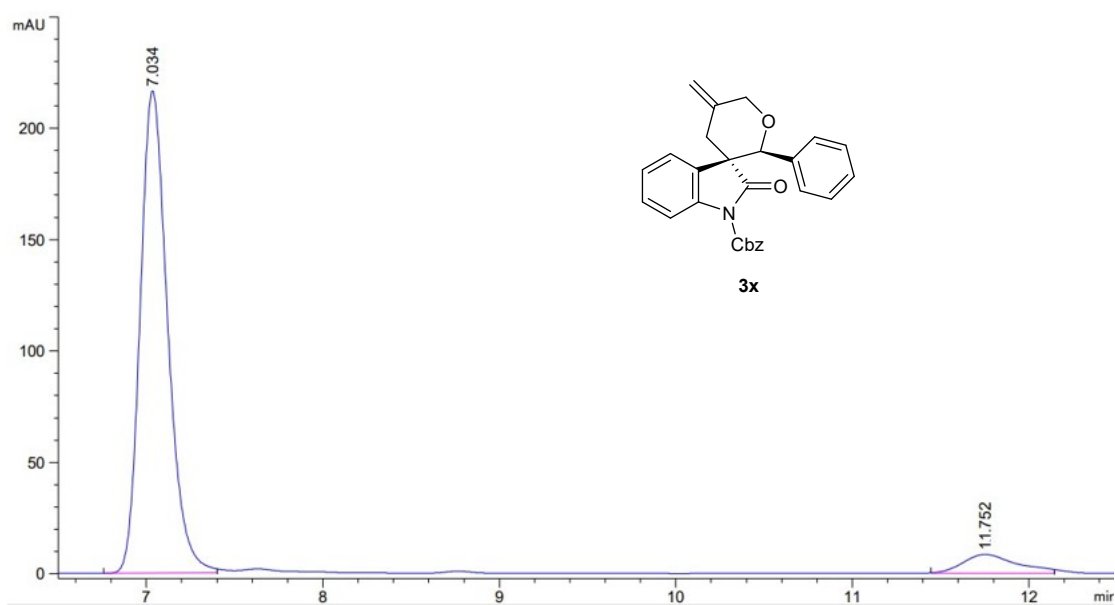

| Peak # | RetTime [min] | Type | Width [min] | Area [mAU*s] | Height [mAU] | Area %  |
|--------|---------------|------|-------------|--------------|--------------|---------|
| 1      | 7.034         | MF   | 0.1794      | 2330.57617   | 216.48880    | 92.7029 |
| 2      | 11.752        | MF   | 0.3593      | 183.45044    | 8.50857      | 7.2971  |

**3y**  
racemic:

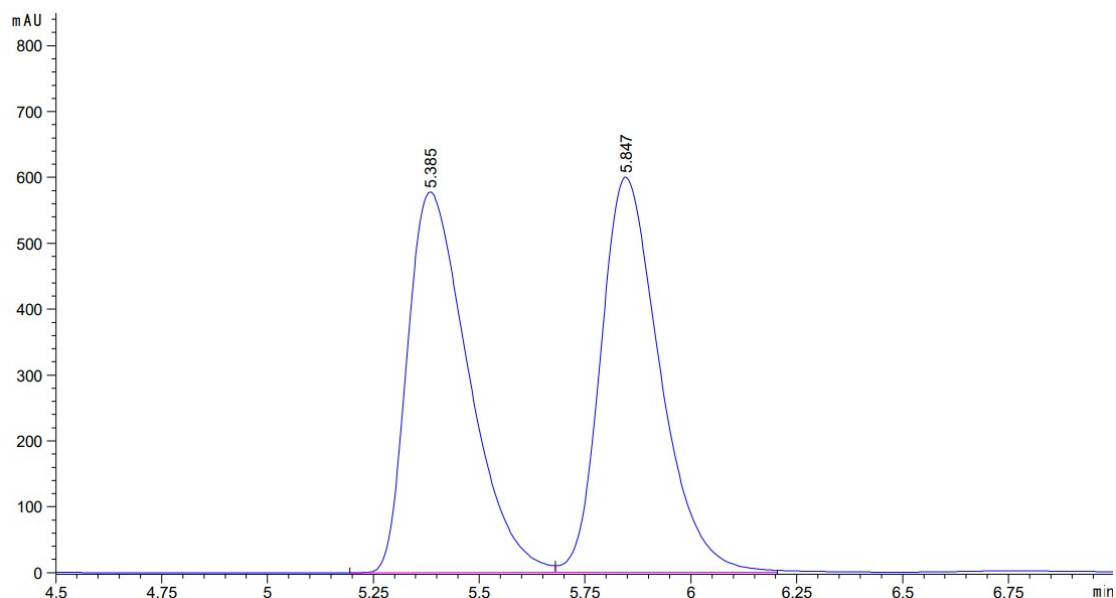

| Peak # | RetTime [min] | Type | Width [min] | Area [mAU*s] | Height [mAU] | Area %  |
|--------|---------------|------|-------------|--------------|--------------|---------|
| 1      | 5.385         | BV   | 0.1544      | 5762.96240   | 577.64154    | 49.7649 |
| 2      | 5.847         | MF   | 0.1615      | 5817.40771   | 600.16779    | 50.2351 |

chrial:

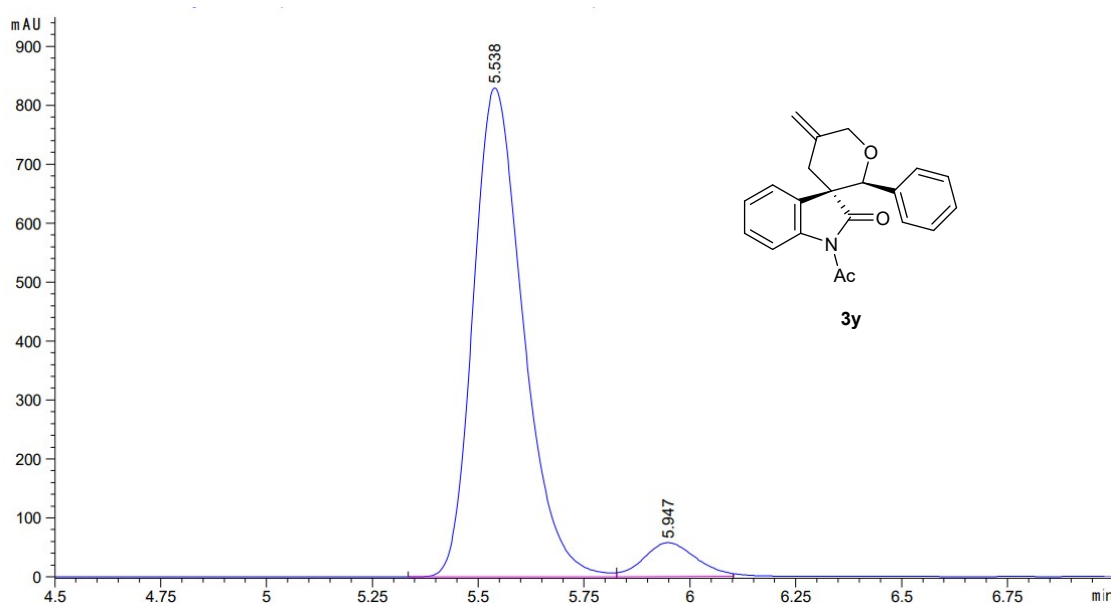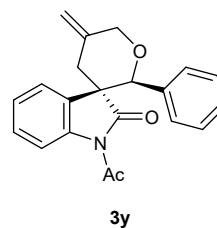



| Peak # | RetTime [min] | Type | Width [min] | Area [mAU*s] | Height [mAU] | Area %  |
|--------|---------------|------|-------------|--------------|--------------|---------|
| 1      | 5.538         | FM   | 0.1364      | 6787.28564   | 829.41815    | 93.2710 |
| 2      | 5.947         | MF   | 0.1420      | 489.66843    | 57.45892     | 6.7290  |

**4a**  
racemic:

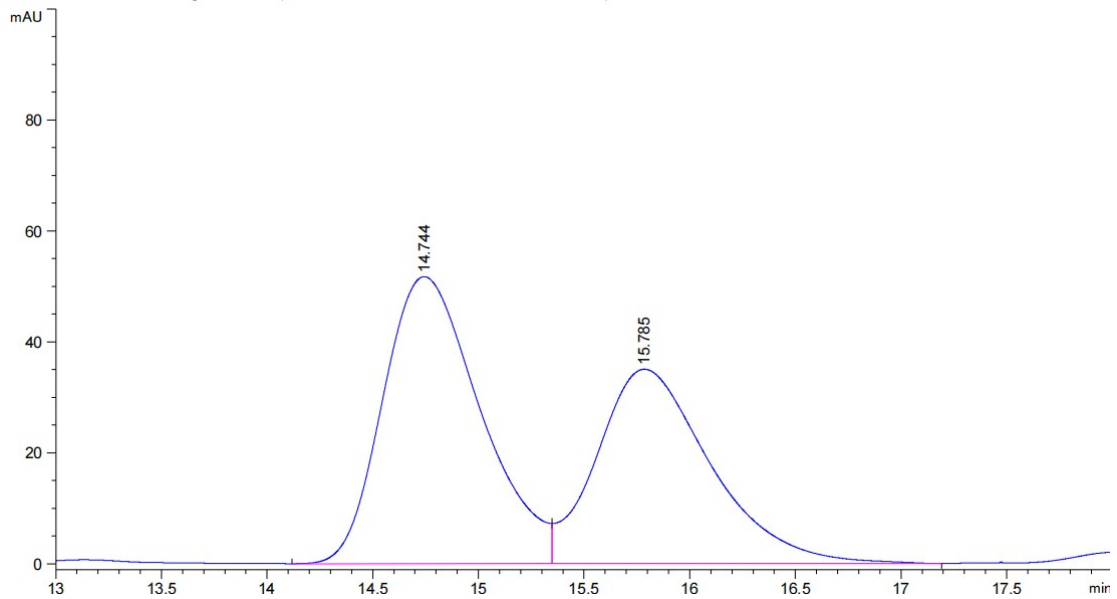

| Peak # | RetTime [min] | Type | Width [min] | Area [mAU*s] | Height [mAU] | Area %  |
|--------|---------------|------|-------------|--------------|--------------|---------|
| 1      | 14.744        | BV   | 0.4900      | 1655.19580   | 51.70258     | 55.8251 |
| 2      | 15.785        | VB   | 0.5448      | 1309.77087   | 35.02126     | 44.1749 |

chrial:

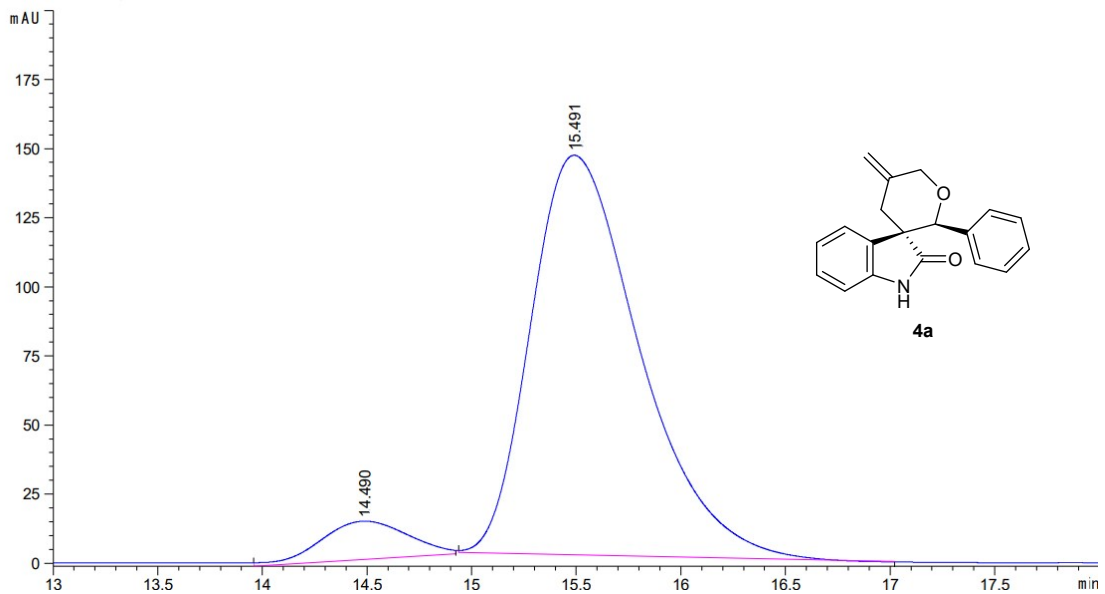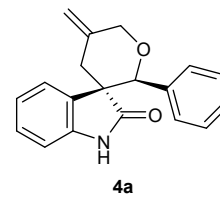

| Peak # | RetTime [min] | Type | Width [min] | Area [mAU*s] | Height [mAU] | Area %  |
|--------|---------------|------|-------------|--------------|--------------|---------|
| 1      | 14.490        | MM   | 0.4835      | 399.73343    | 13.77929     | 7.1178  |
| 2      | 15.491        | MM   | 0.6015      | 5216.21094   | 144.52611    | 92.8822 |

**5a**  
racemic:

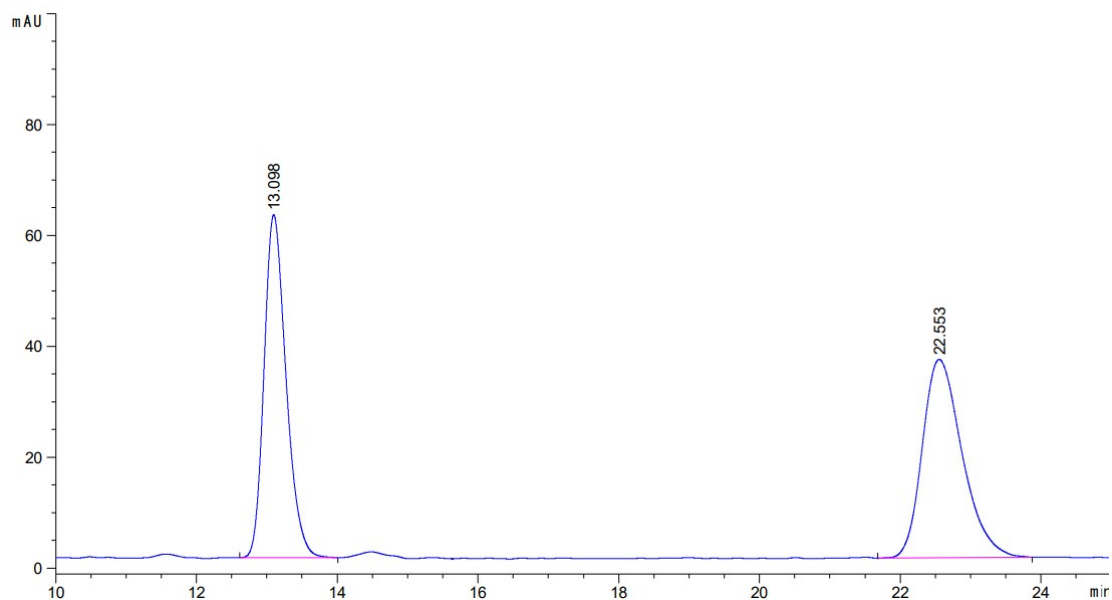

| Peak # | RetTime [min] | Type | Width [min] | Area [mAU*s] | Height [mAU] | Area %  |
|--------|---------------|------|-------------|--------------|--------------|---------|
| 1      | 13.098        | BB   | 0.3288      | 1340.18835   | 61.83987     | 48.7690 |
| 2      | 22.553        | BB   | 0.5880      | 1407.84644   | 35.78169     | 51.2310 |

chiral:

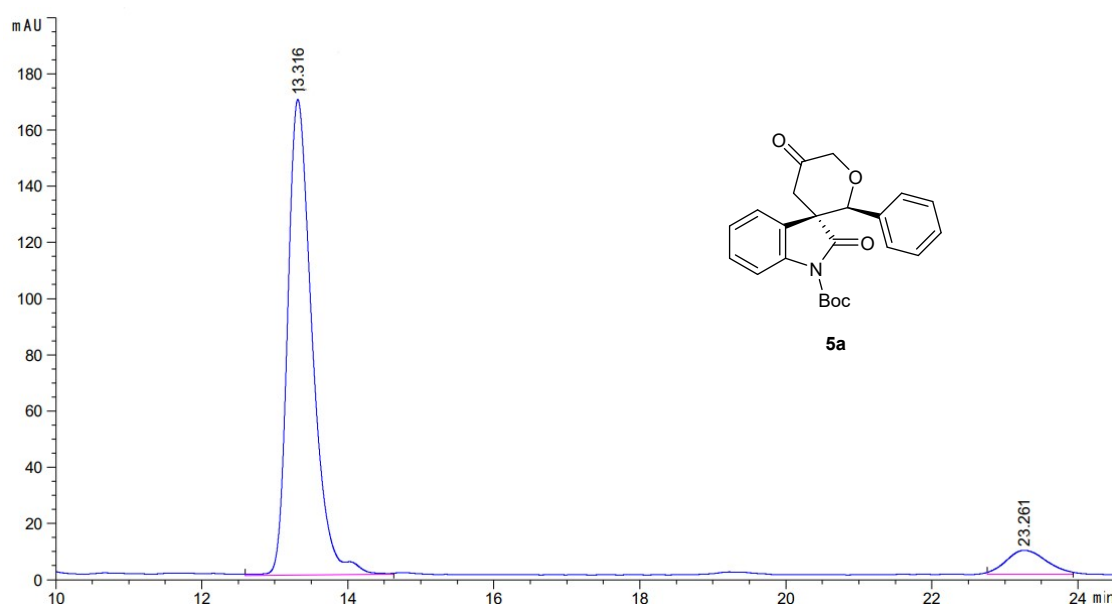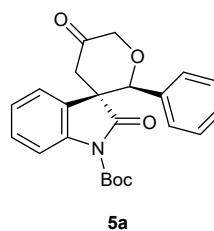

| Peak # | RetTime [min] | Type | Width [min] | Area [mAU*s] | Height [mAU] | Area %  |
|--------|---------------|------|-------------|--------------|--------------|---------|
| 1      | 13.316        | MM   | 0.3885      | 3946.72461   | 169.31685    | 92.3644 |
| 2      | 23.261        | MM   | 0.6358      | 326.26807    | 8.55324      | 7.6356  |

**6a**  
racemic:

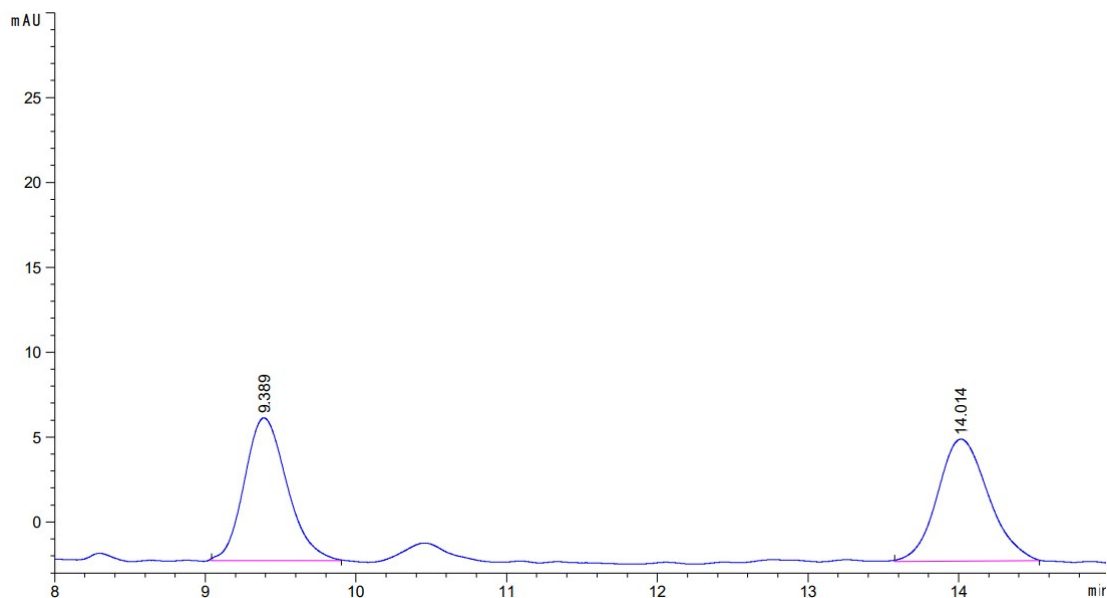

| Peak # | RetTime [min] | Type | Width [min] | Area [mAU*s] | Height [mAU] | Area %  |
|--------|---------------|------|-------------|--------------|--------------|---------|
| 1      | 9.389         | MM   | 0.3281      | 165.63104    | 8.41306      | 49.5591 |
| 2      | 14.014        | MM   | 0.3907      | 168.57825    | 7.19210      | 50.4409 |

chiral:

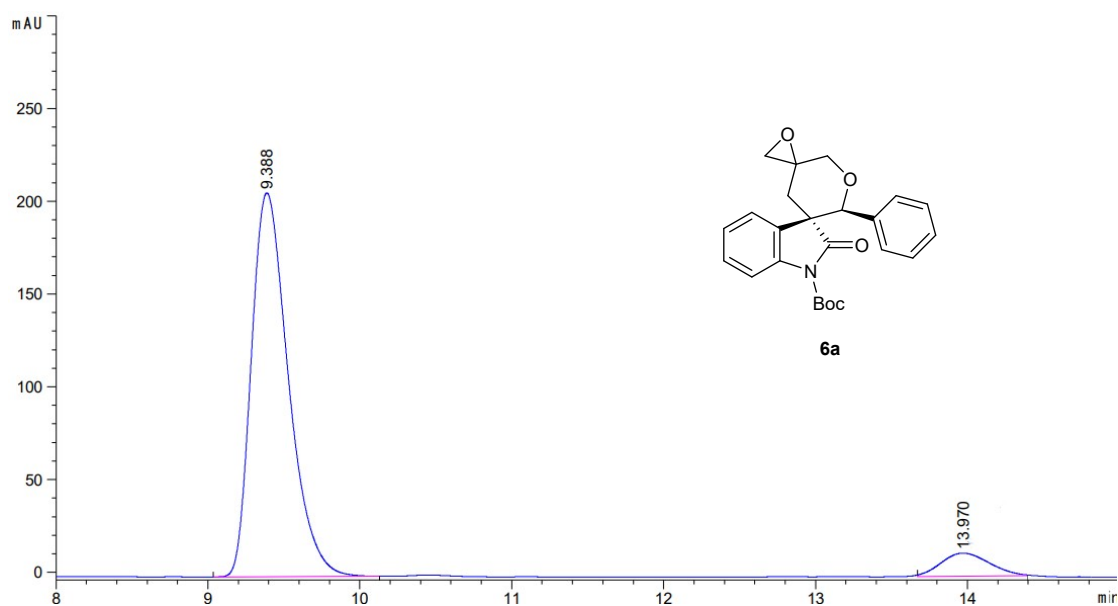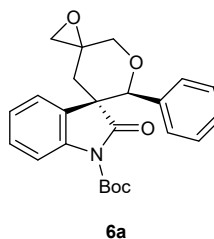

| Peak # | RetTime [min] | Type | Width [min] | Area [mAU*s] | Height [mAU] | Area %  |
|--------|---------------|------|-------------|--------------|--------------|---------|
| 1      | 9.388         | BB   | 0.2610      | 3492.31396   | 206.86449    | 92.8108 |
| 2      | 13.970        | MM   | 0.3577      | 270.51639    | 12.60367     | 7.1892  |

### 7a

racemic:

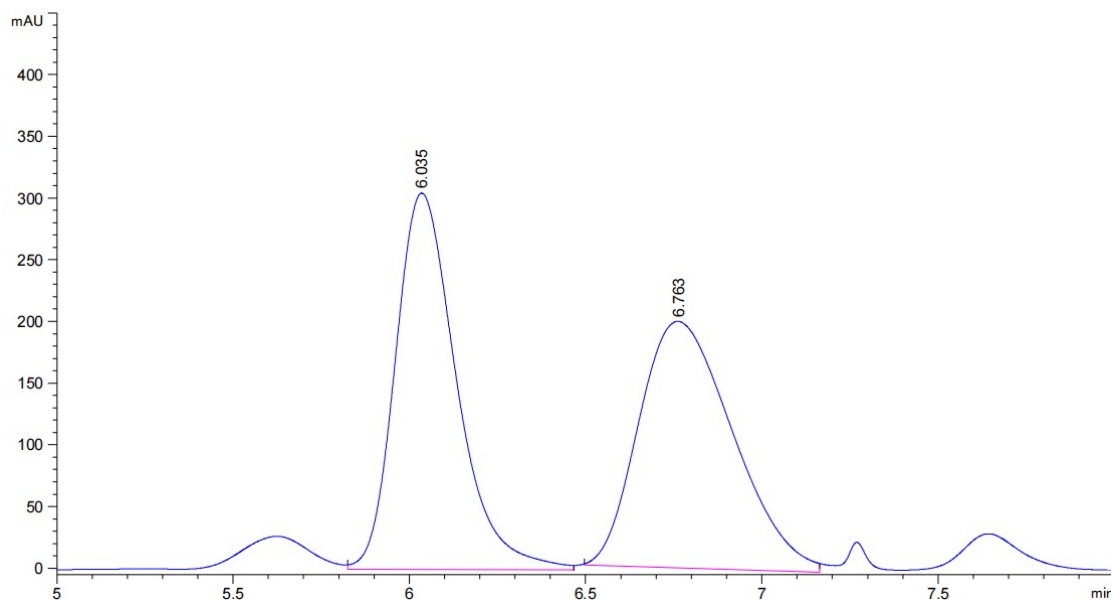

| Peak # | RetTime [min] | Type | Width [min] | Area [mAU*s] | Height [mAU] | Area %  |
|--------|---------------|------|-------------|--------------|--------------|---------|
| 1      | 6.035         | FM   | 0.2007      | 3672.75806   | 305.01614    | 49.8565 |
| 2      | 6.763         | MM   | 0.3083      | 3693.89746   | 199.69498    | 50.1435 |

chiral:

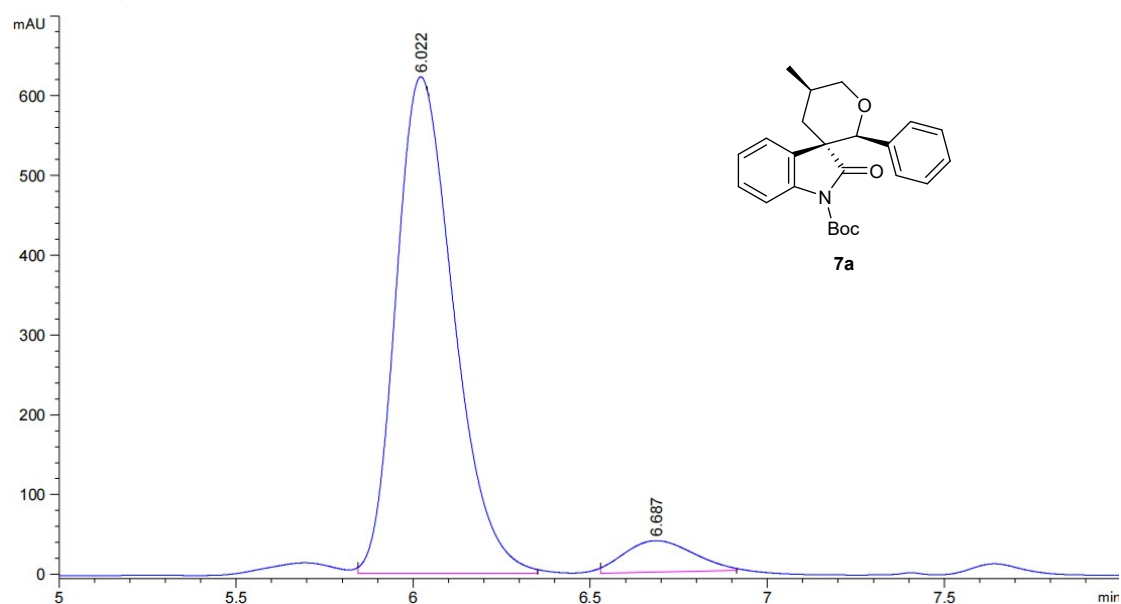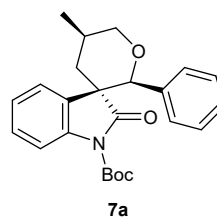

| Peak # | RetTime [min] | Type | Width [min] | Area [mAU*s] | Height [mAU] | Area %  |
|--------|---------------|------|-------------|--------------|--------------|---------|
| 1      | 6.022         | MM   | 0.1882      | 7029.52002   | 622.37854    | 92.9785 |
| 2      | 6.687         | MM   | 0.2247      | 530.84863    | 39.36784     | 7.0215  |
